# Supplementary material for: Enantiomeric scaffolding of α-tetralone and related scaffolds by EKR (Enzymatic Kinetic Resolution) and stereoselective ketoreduction with ketoreductases
Source: Royal Society of Chemistry journal article supplement (doi:10.1039/c1ob06545a), 2011-10-04

**Enantiomeric scaffolding of  $\alpha$ -tetralone and related scaffolds by  
EKR (Enzymatic Kinetic Resolution) and stereoselective  
ketoreduction with ketoreductases**

Rajib Bhuniya and Samik Nanda\*

Department of Chemistry, Indian Institute of Technology, Kharagpur, 721302, India

[snanda@chem.iitkgp.ernet.in](mailto:snanda@chem.iitkgp.ernet.in)

**Supporting Information Part I**

| <b>Contents</b>    | <b>Page number</b> |
|--------------------|--------------------|
| <b>NMR spectra</b> | <b>2-134</b>       |

# <sup>1</sup>H NMR of compound 2

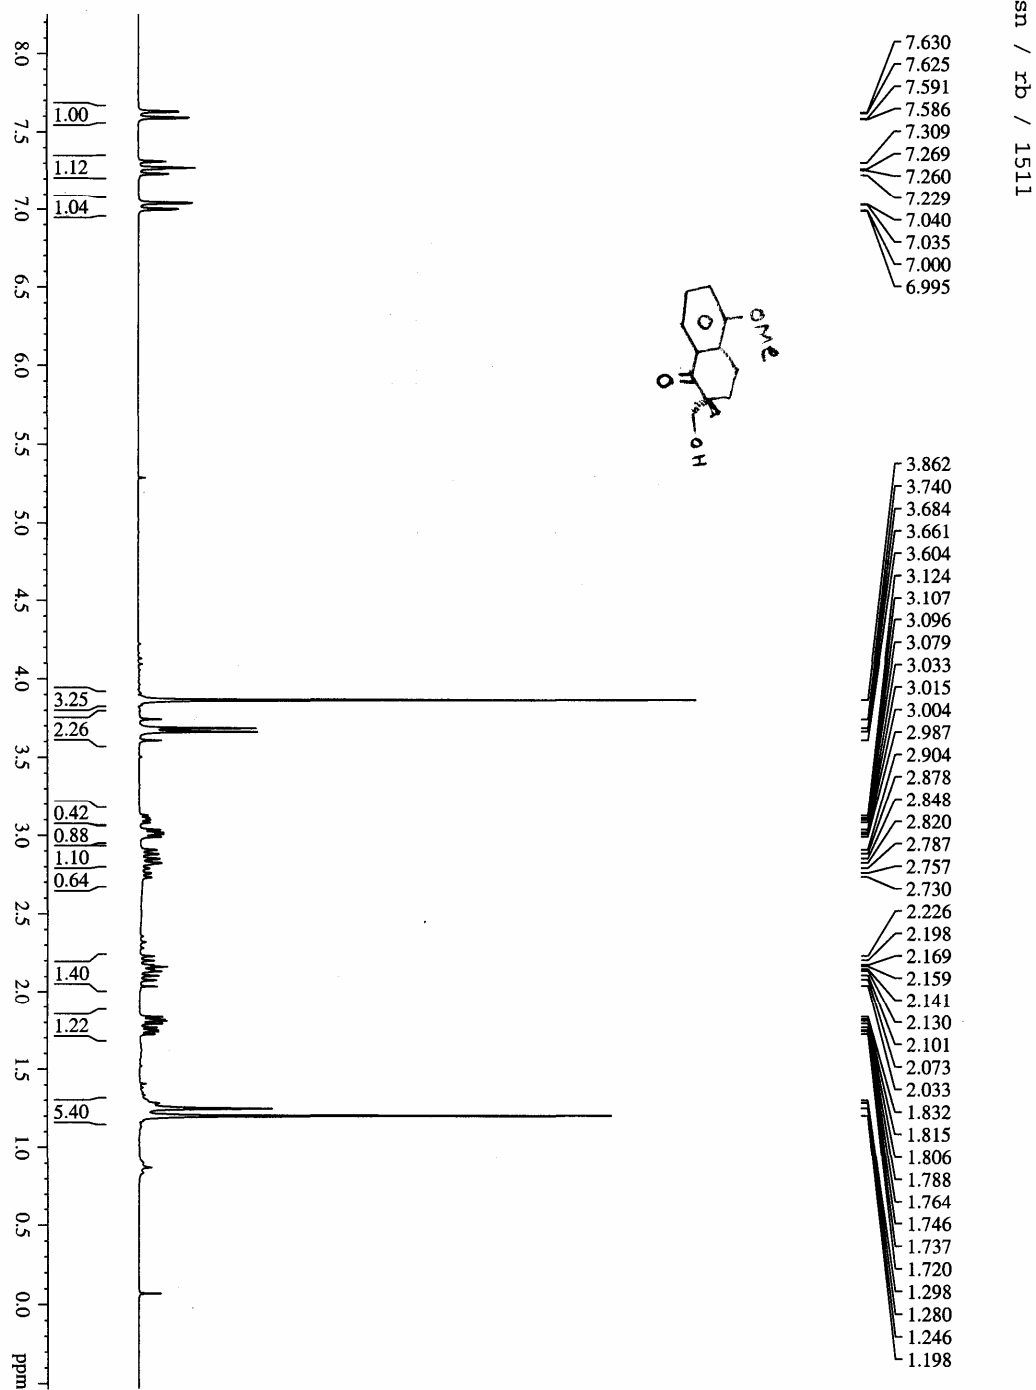

# <sup>13</sup>C NMR of compound 2

sn / rb / rn - 151 - 1 - 13c

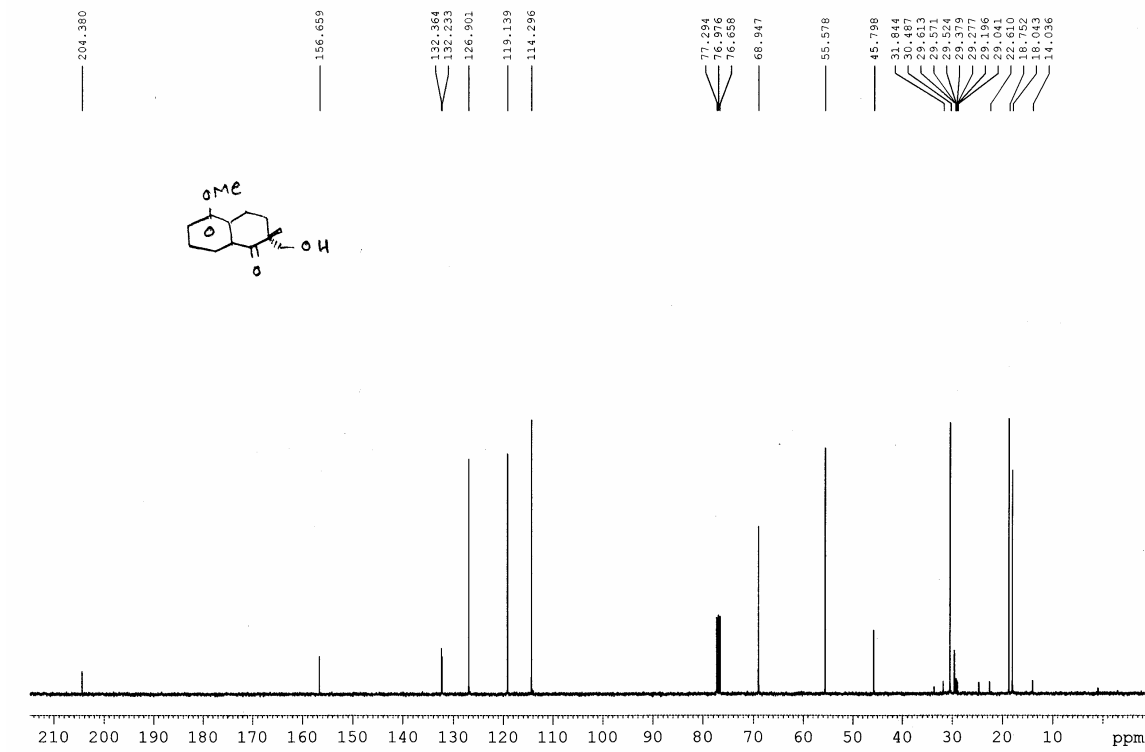

# <sup>1</sup>H NMR of acetate derivative of 2

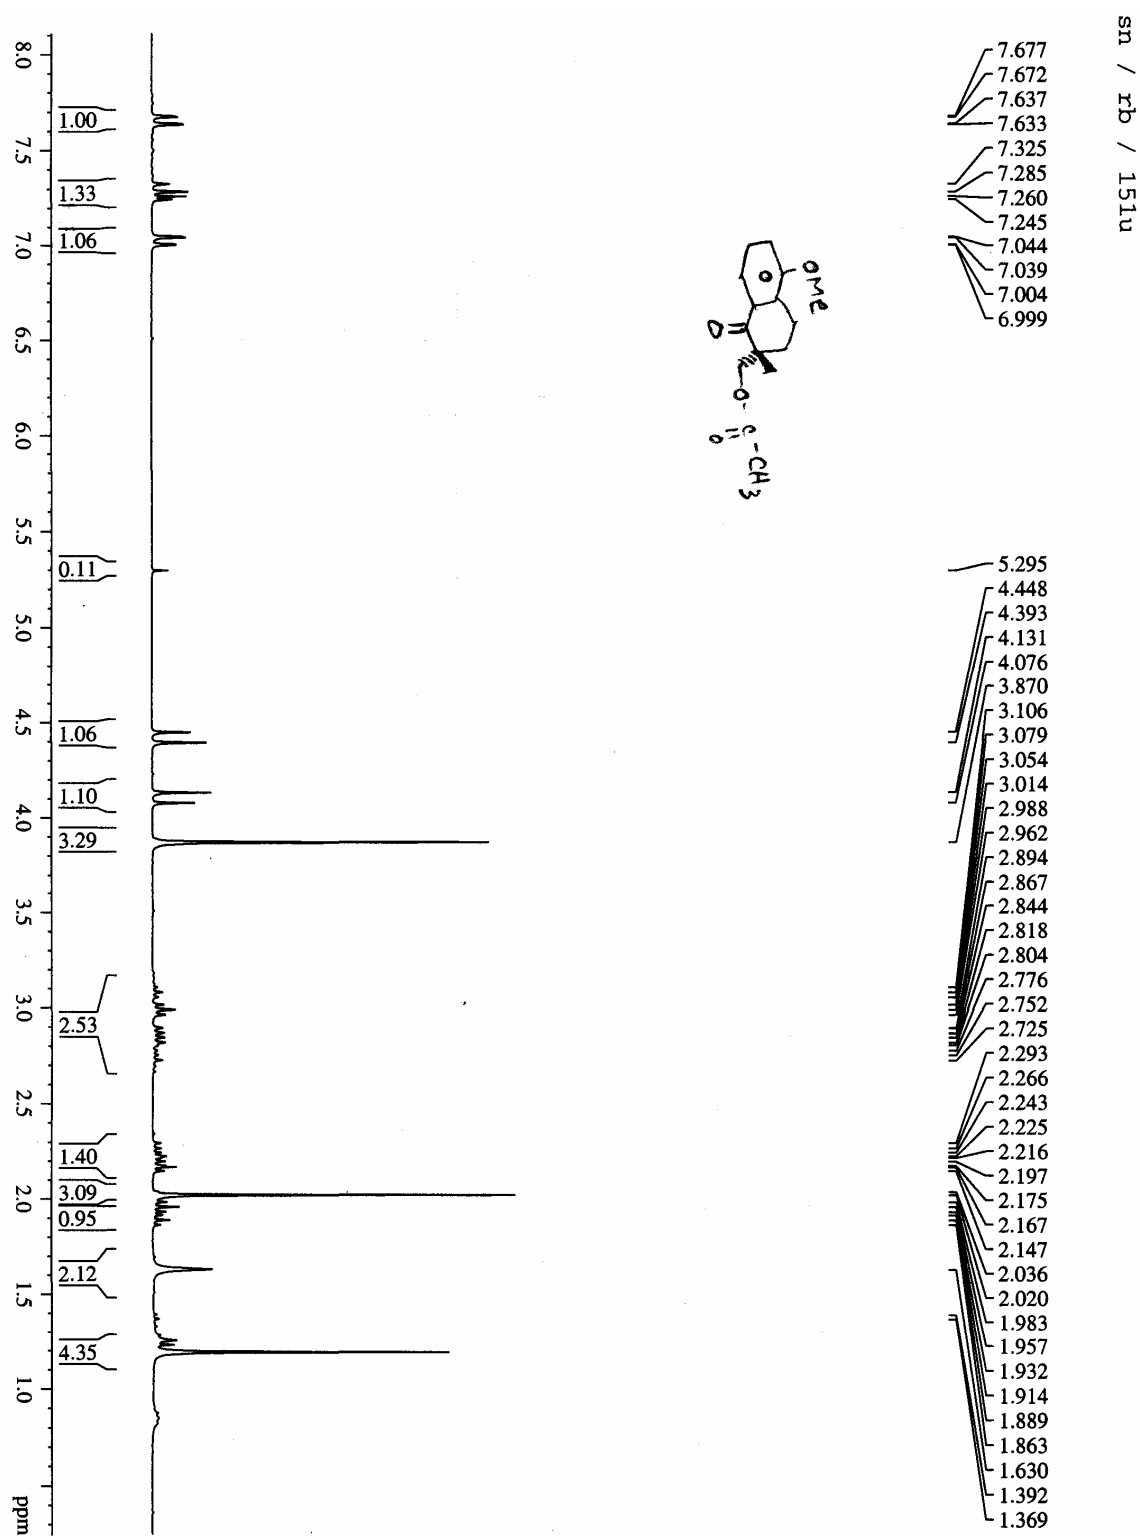



# <sup>13</sup>C NMR of acetate derivative of 2

sn / rb / rn - 151 - 13c

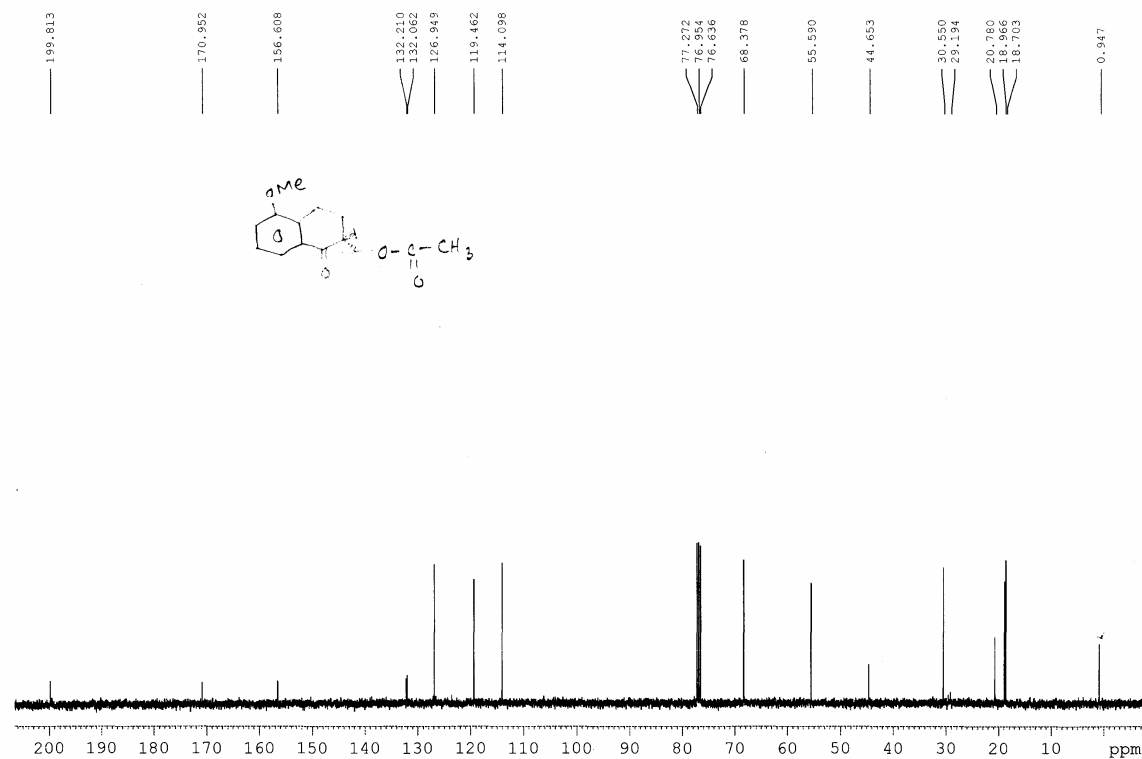

# <sup>1</sup>H NMR of compound 3

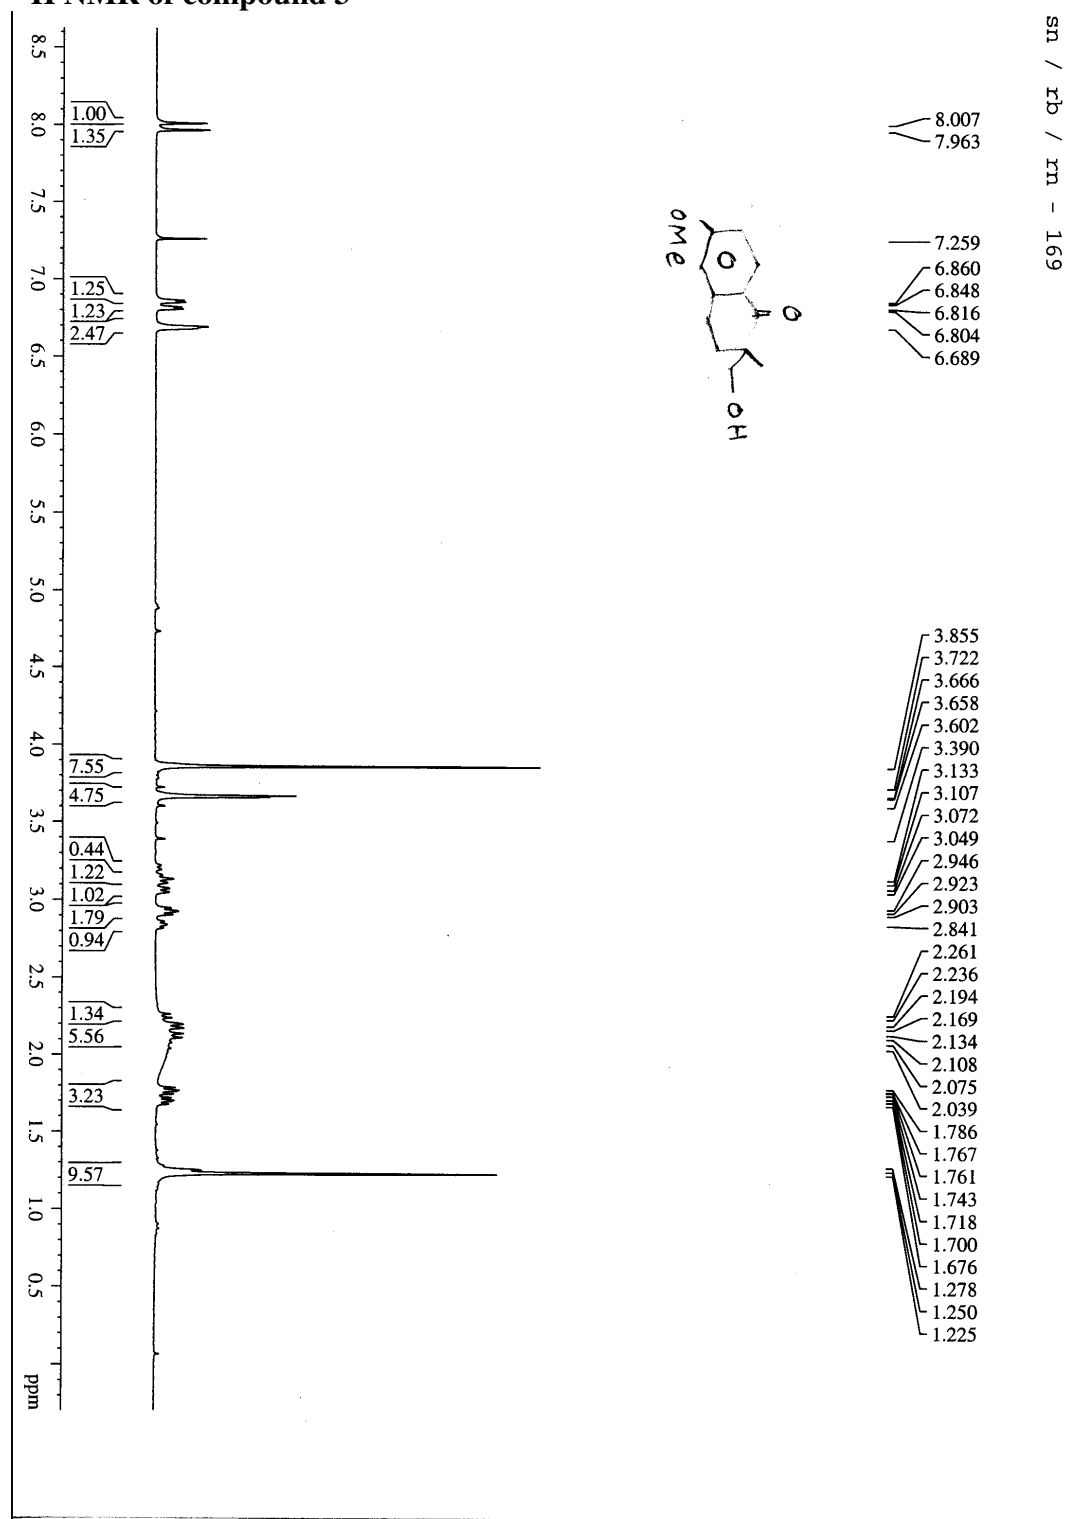

# <sup>13</sup>C NMR of compound 3

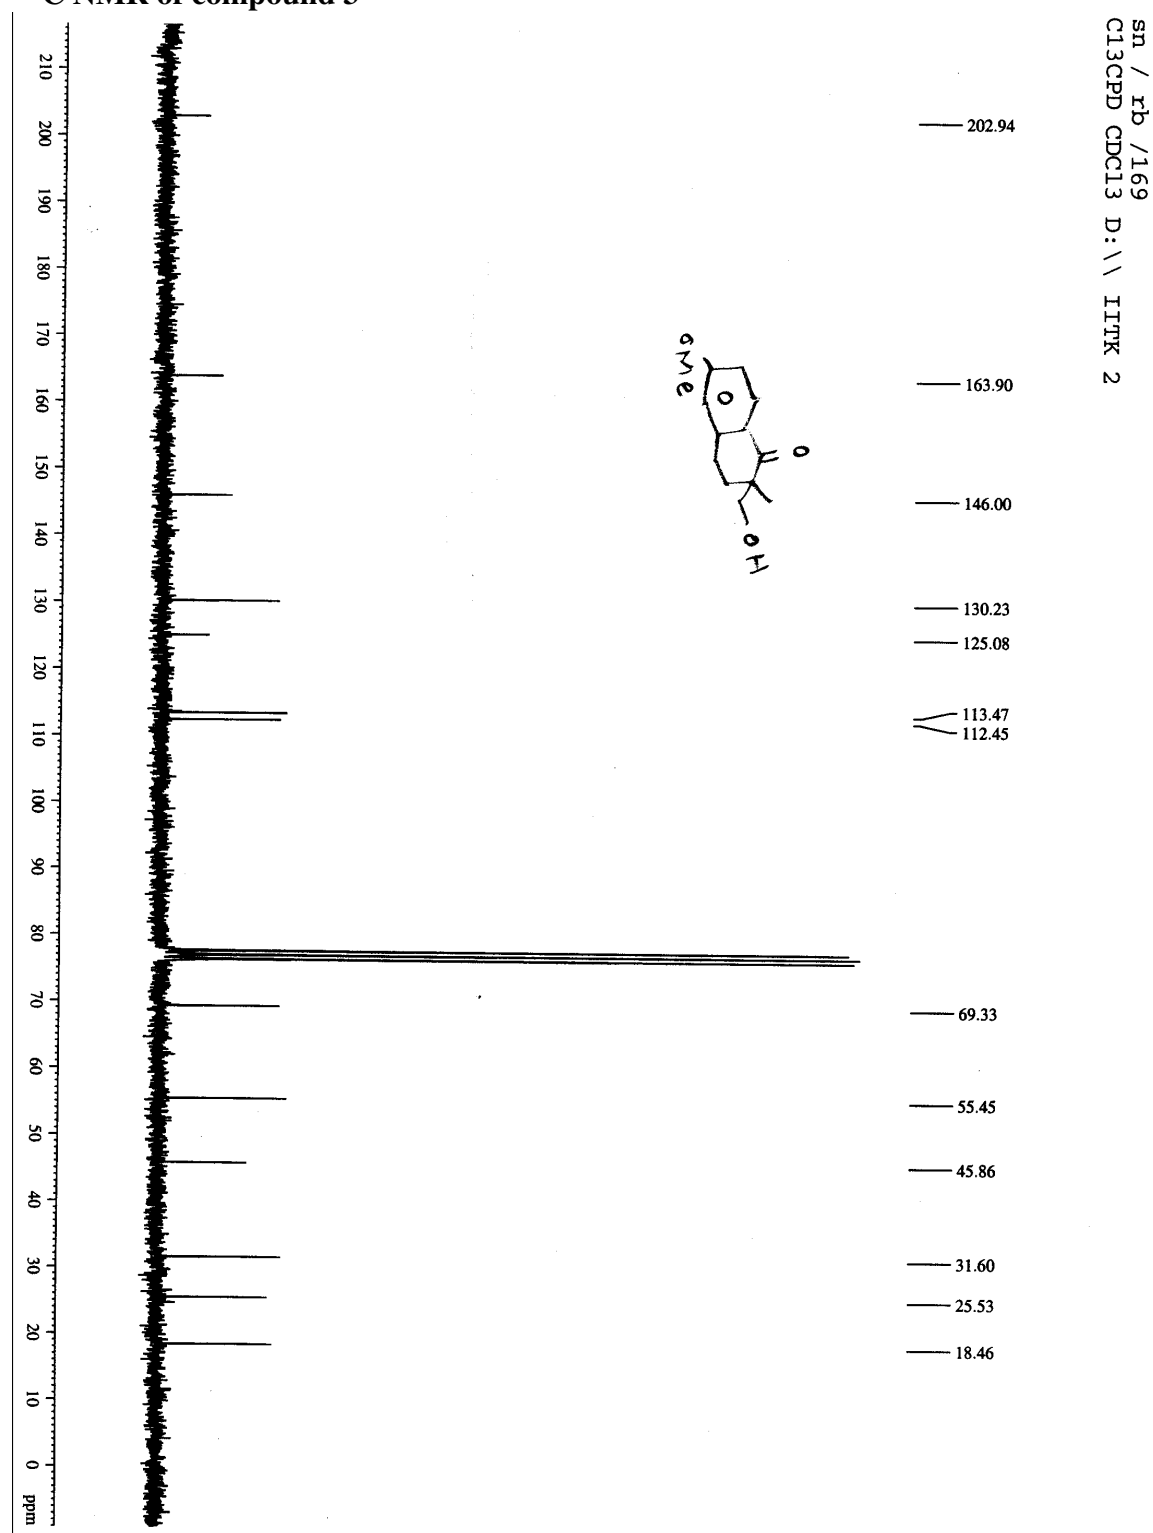

# <sup>1</sup>H NMR of acetate derivative of 3

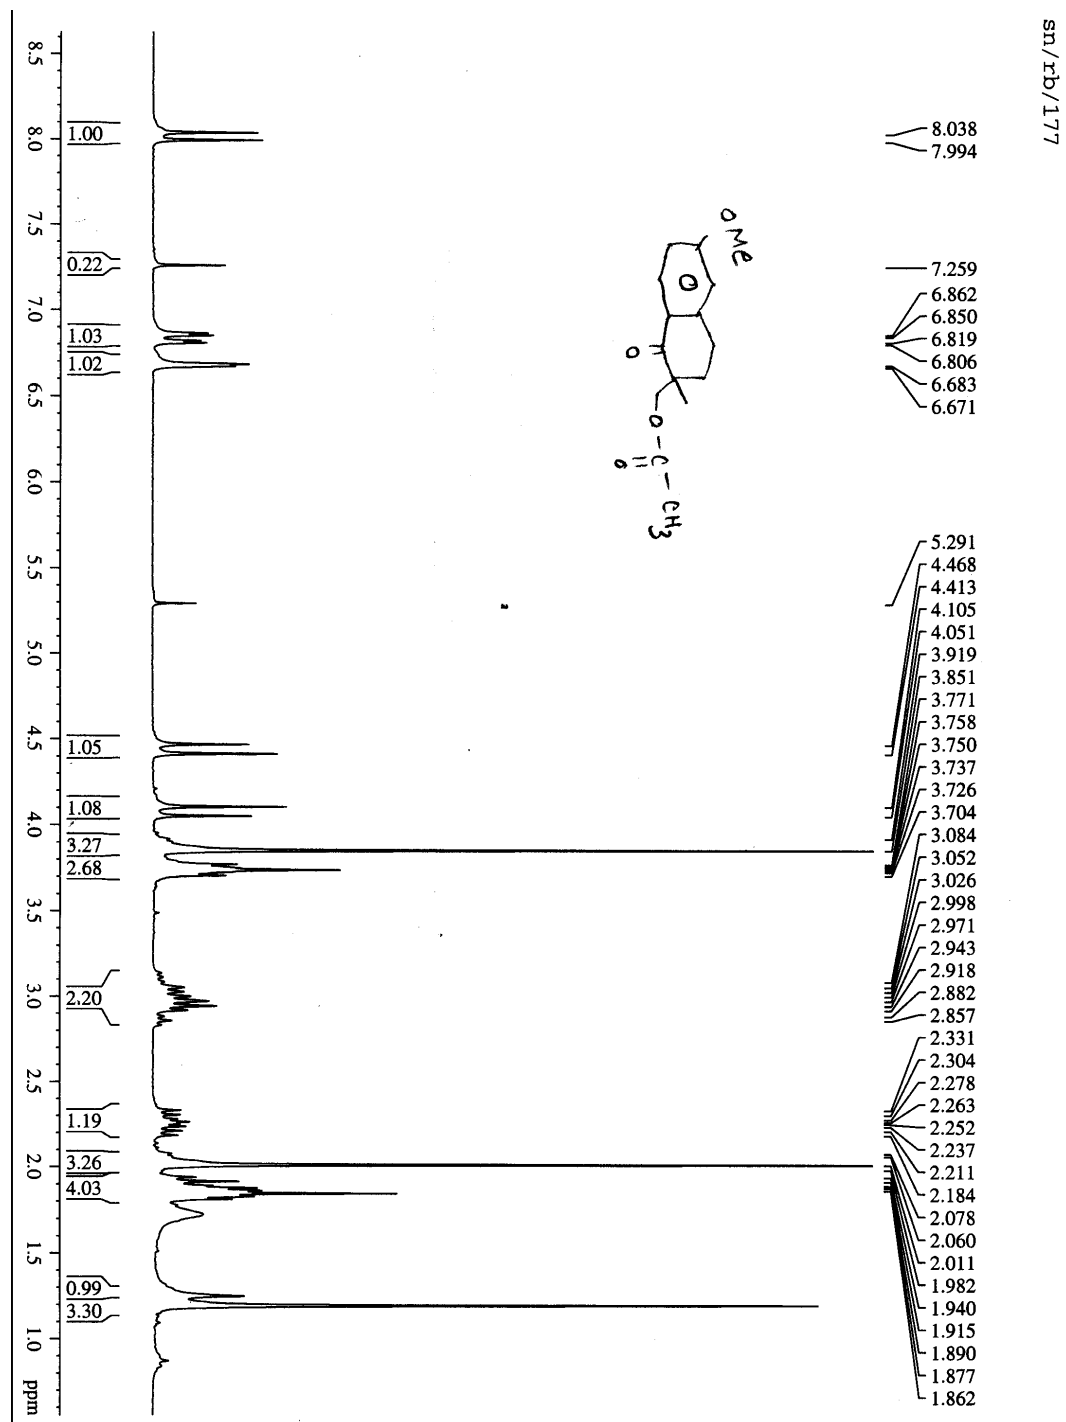

# <sup>13</sup>C NMR of acetate derivative of 3

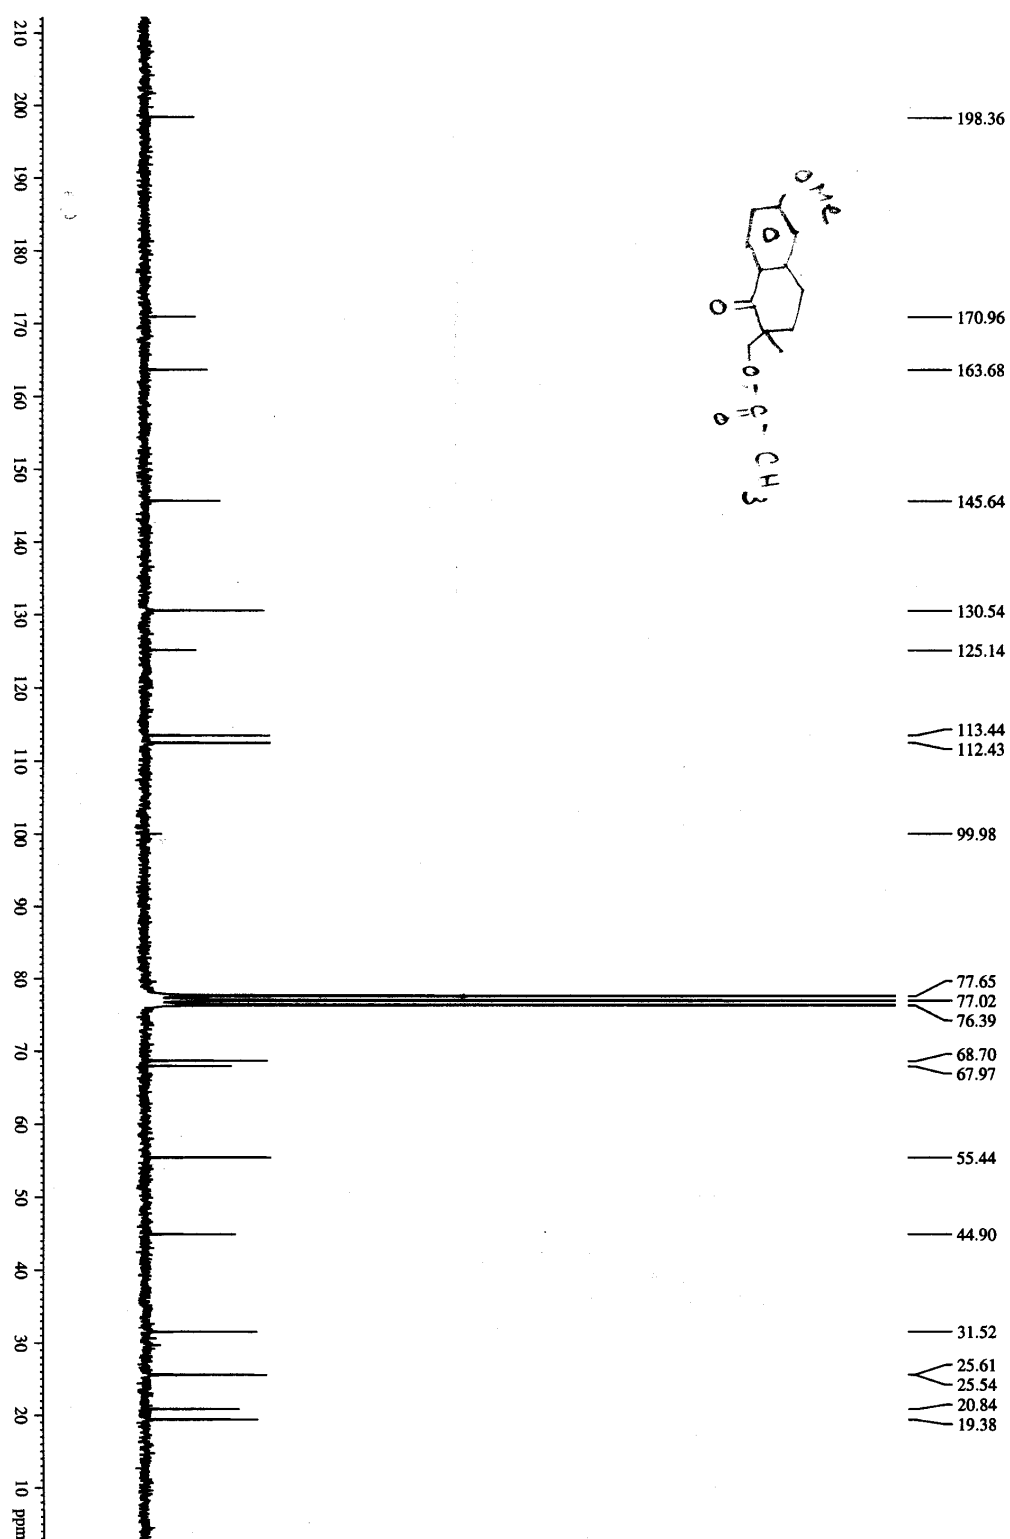

snc/rb/177  
C13CPD CDCl3 D:\ IITK 12

# <sup>1</sup>H NMR of acetate derivative of 4

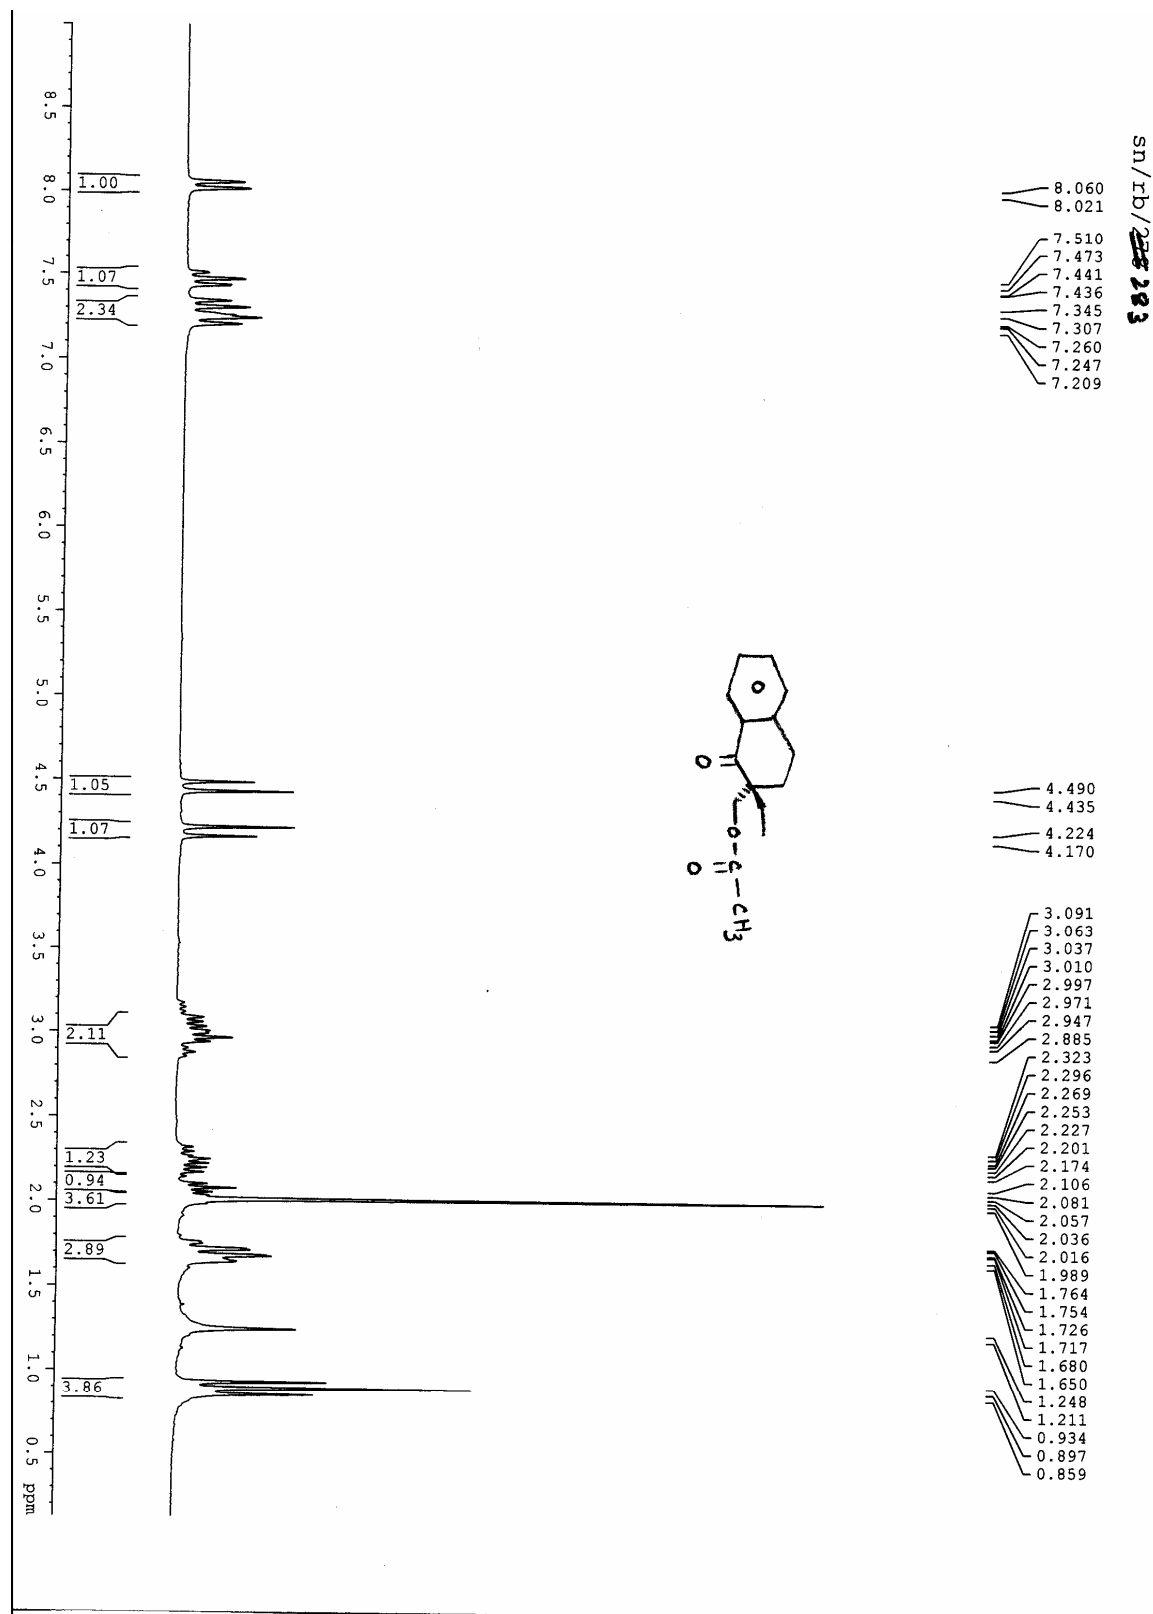

# <sup>13</sup>C NMR of acetate derivative of 4

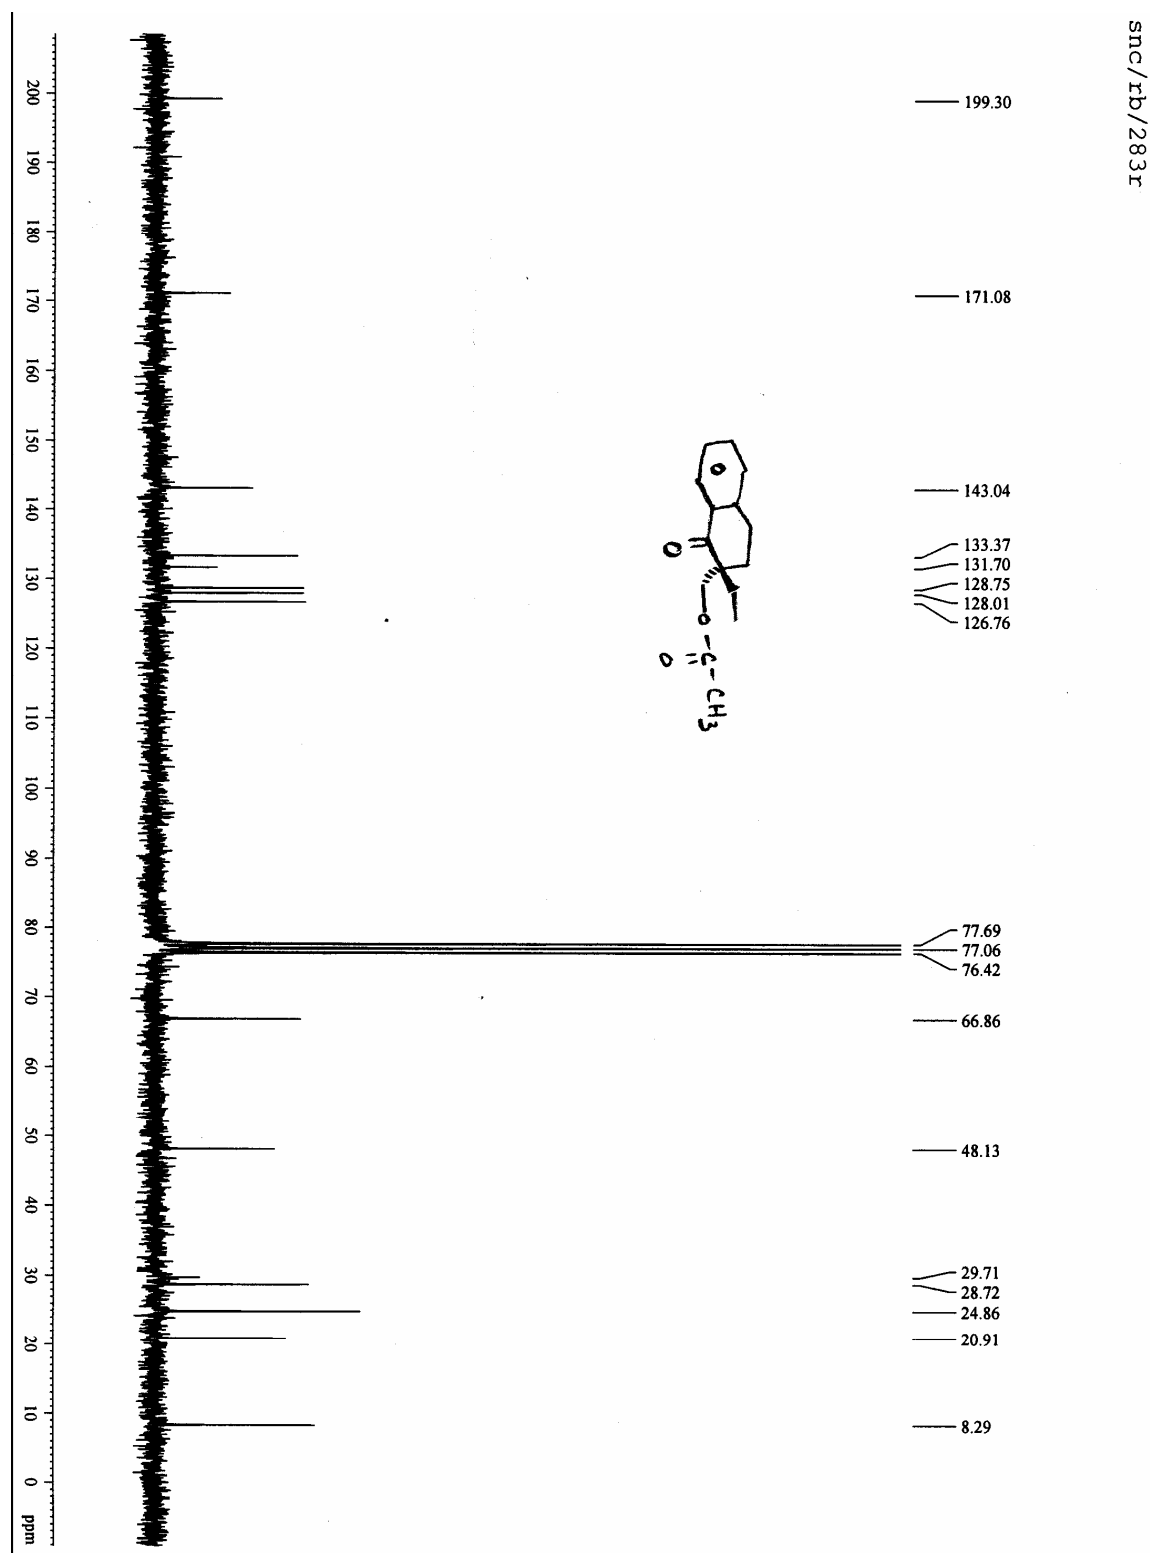

# <sup>1</sup>H NMR of compound 7

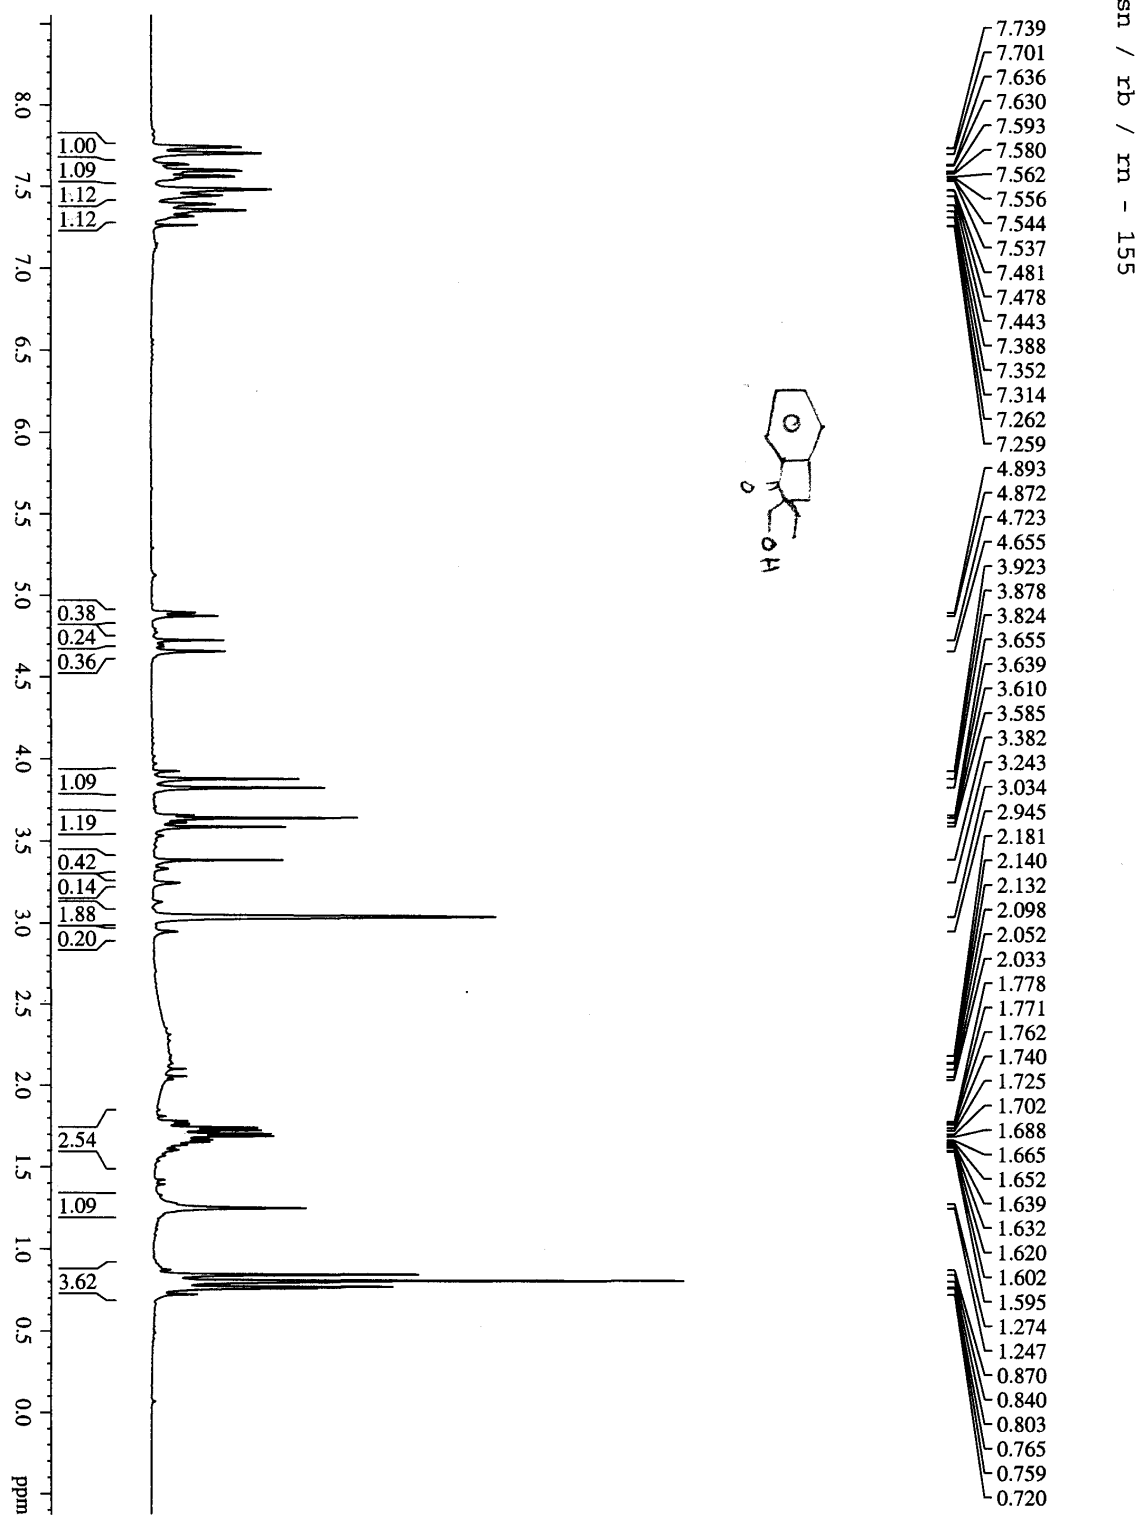



# <sup>13</sup>C NMR of compound 7

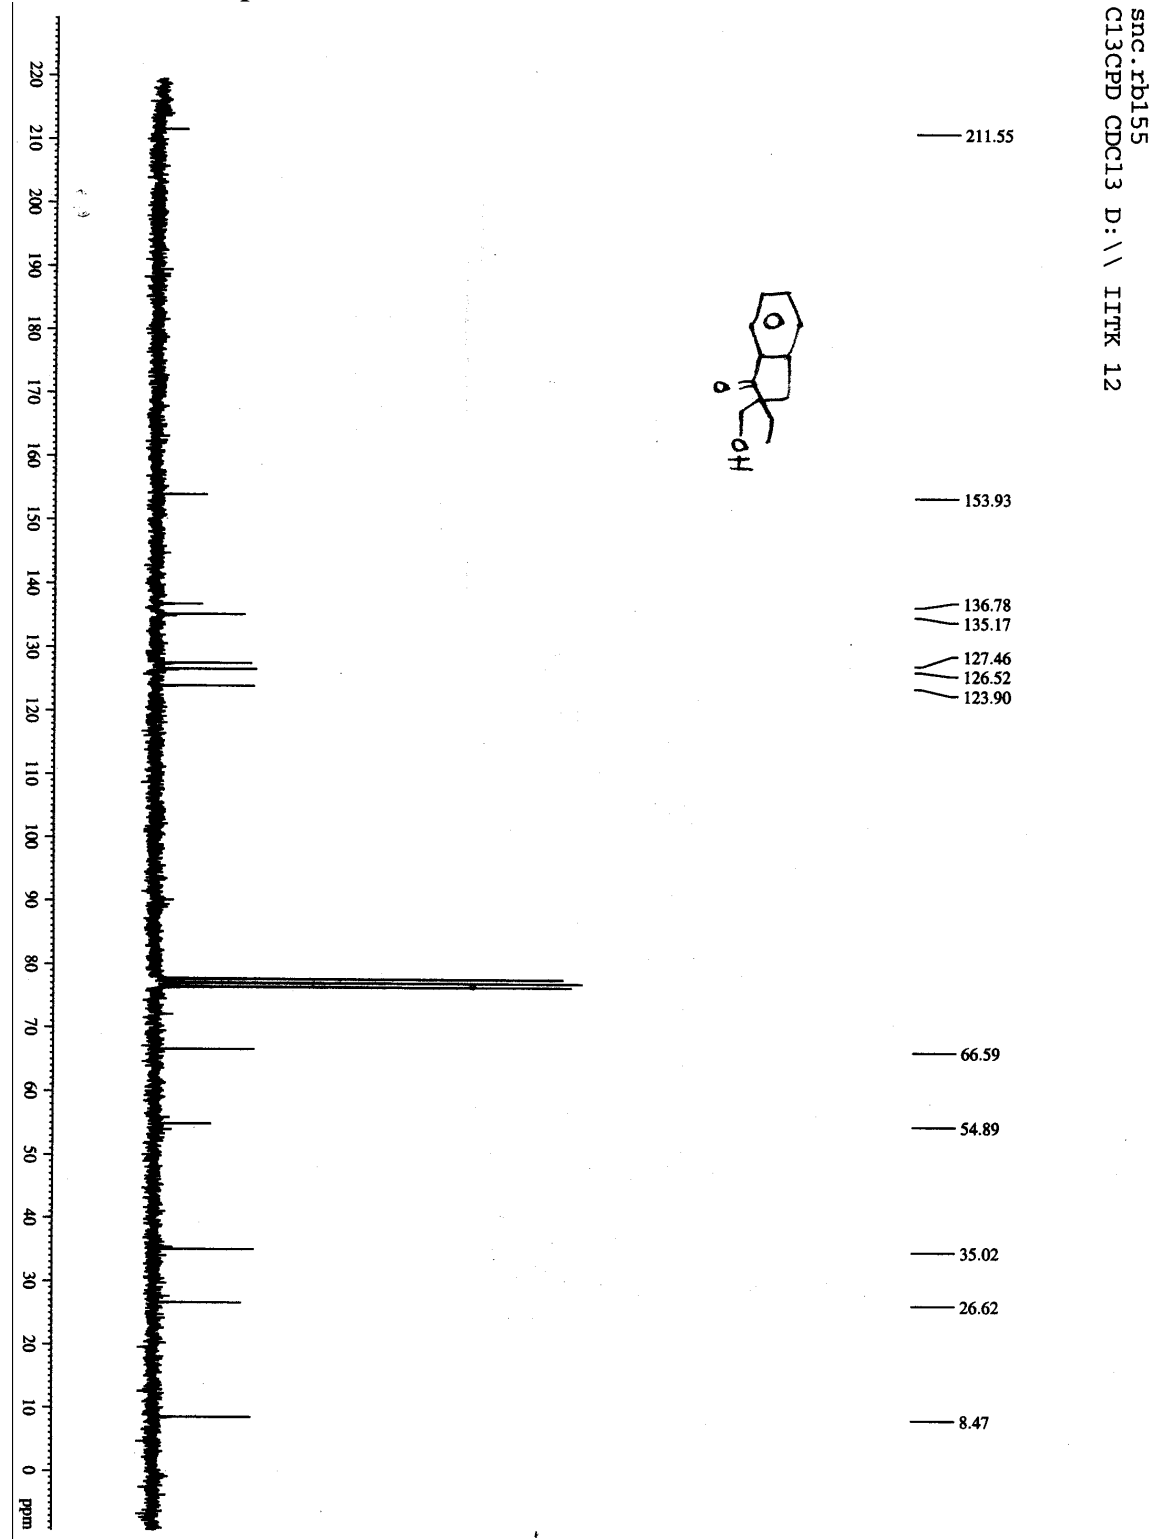

**<sup>1</sup>H NMR of acetate derivative of 7**

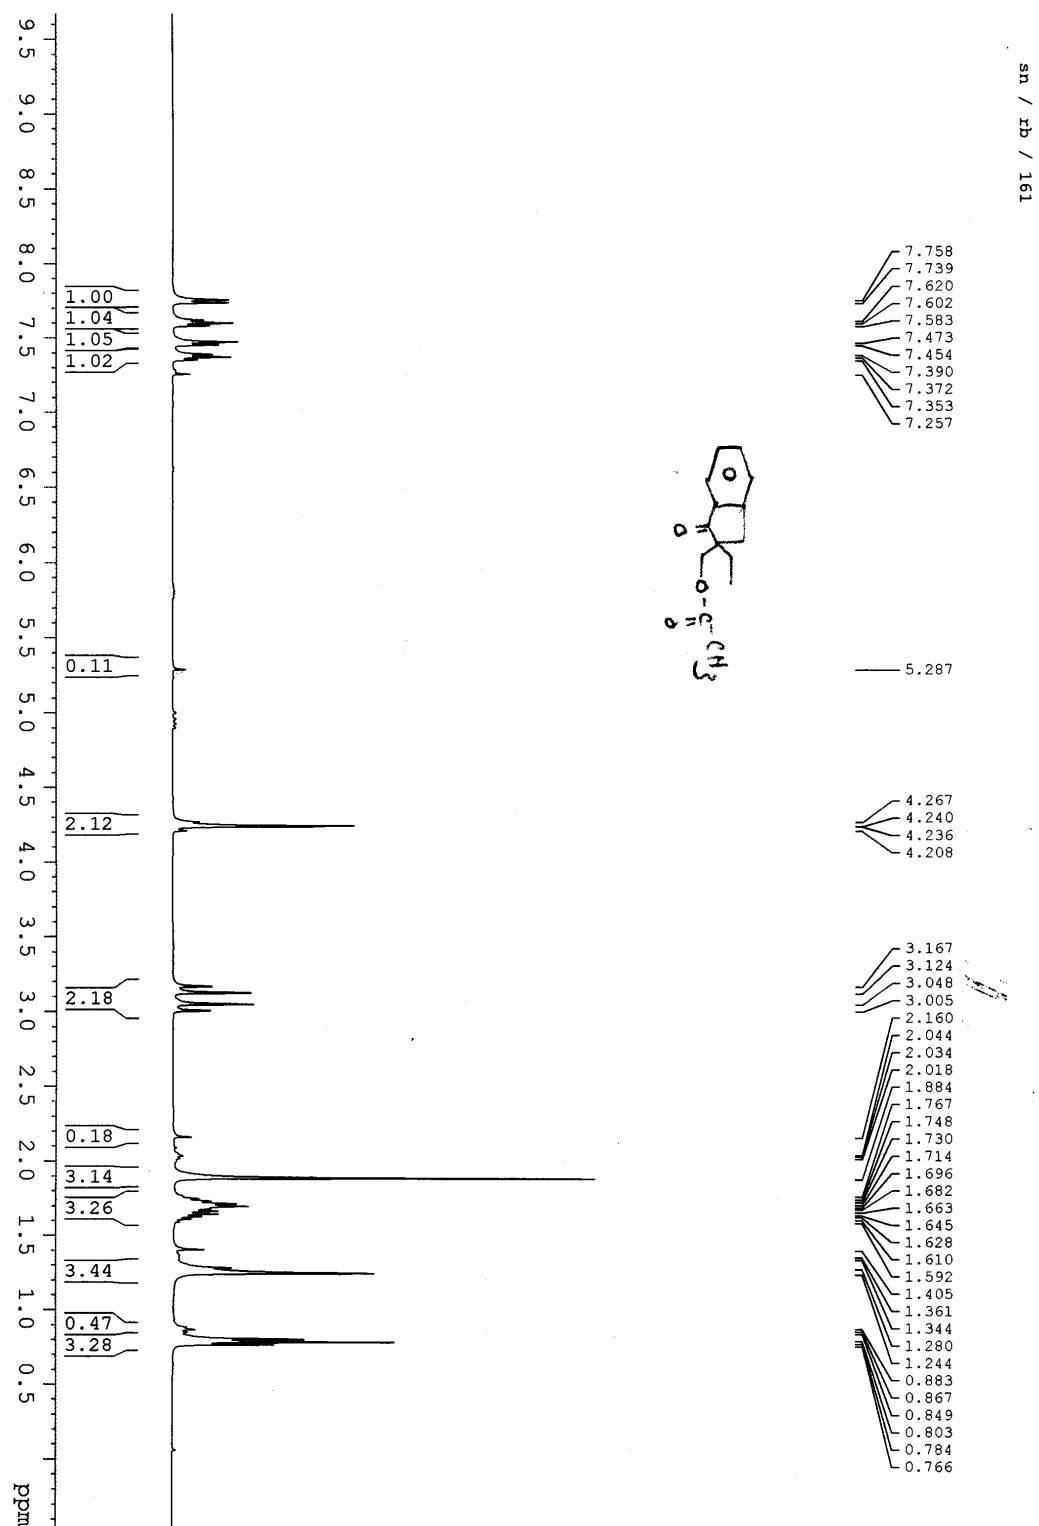

# <sup>13</sup>C NMR of acetate derivative of 7

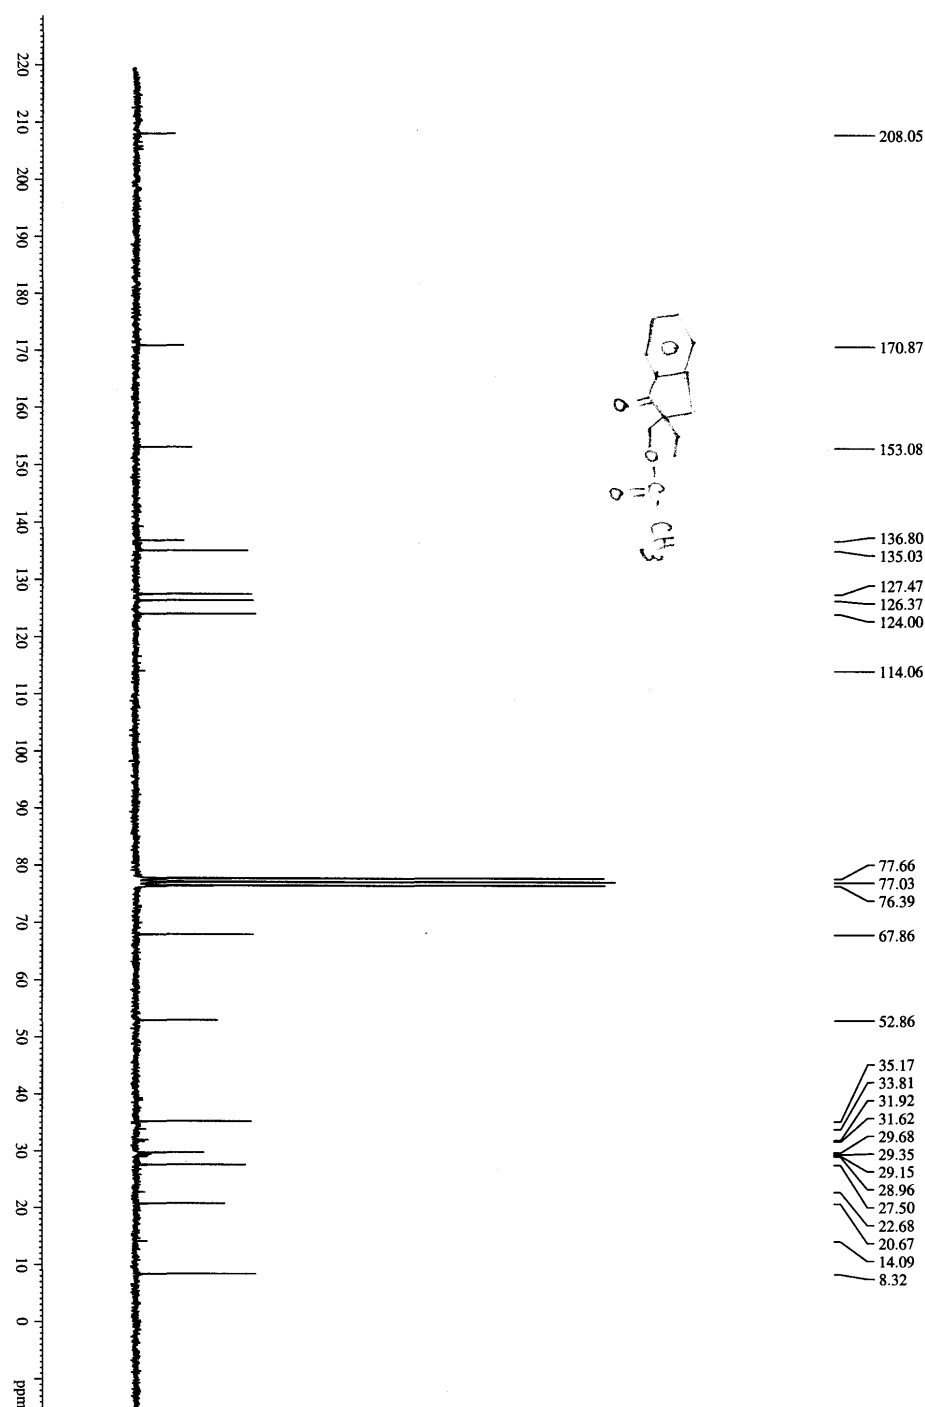

sn / rb / rn-161 - 13c

# <sup>1</sup>H NMR of compound 8

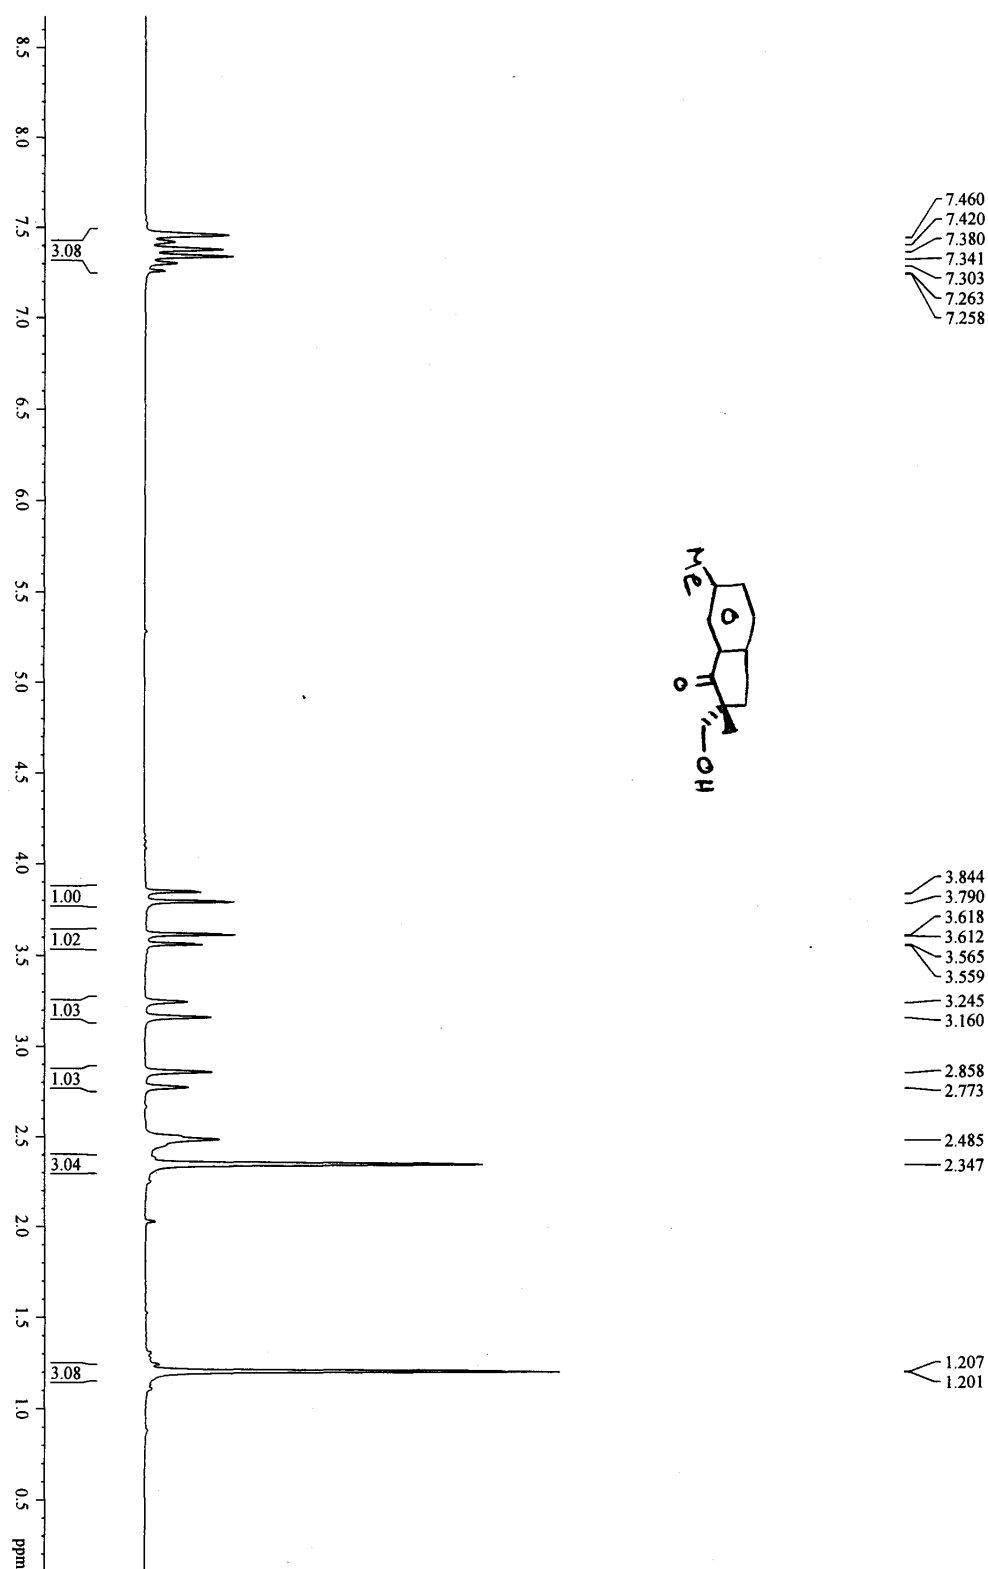

sn/rb/164

# <sup>13</sup>C NMR of compound 8

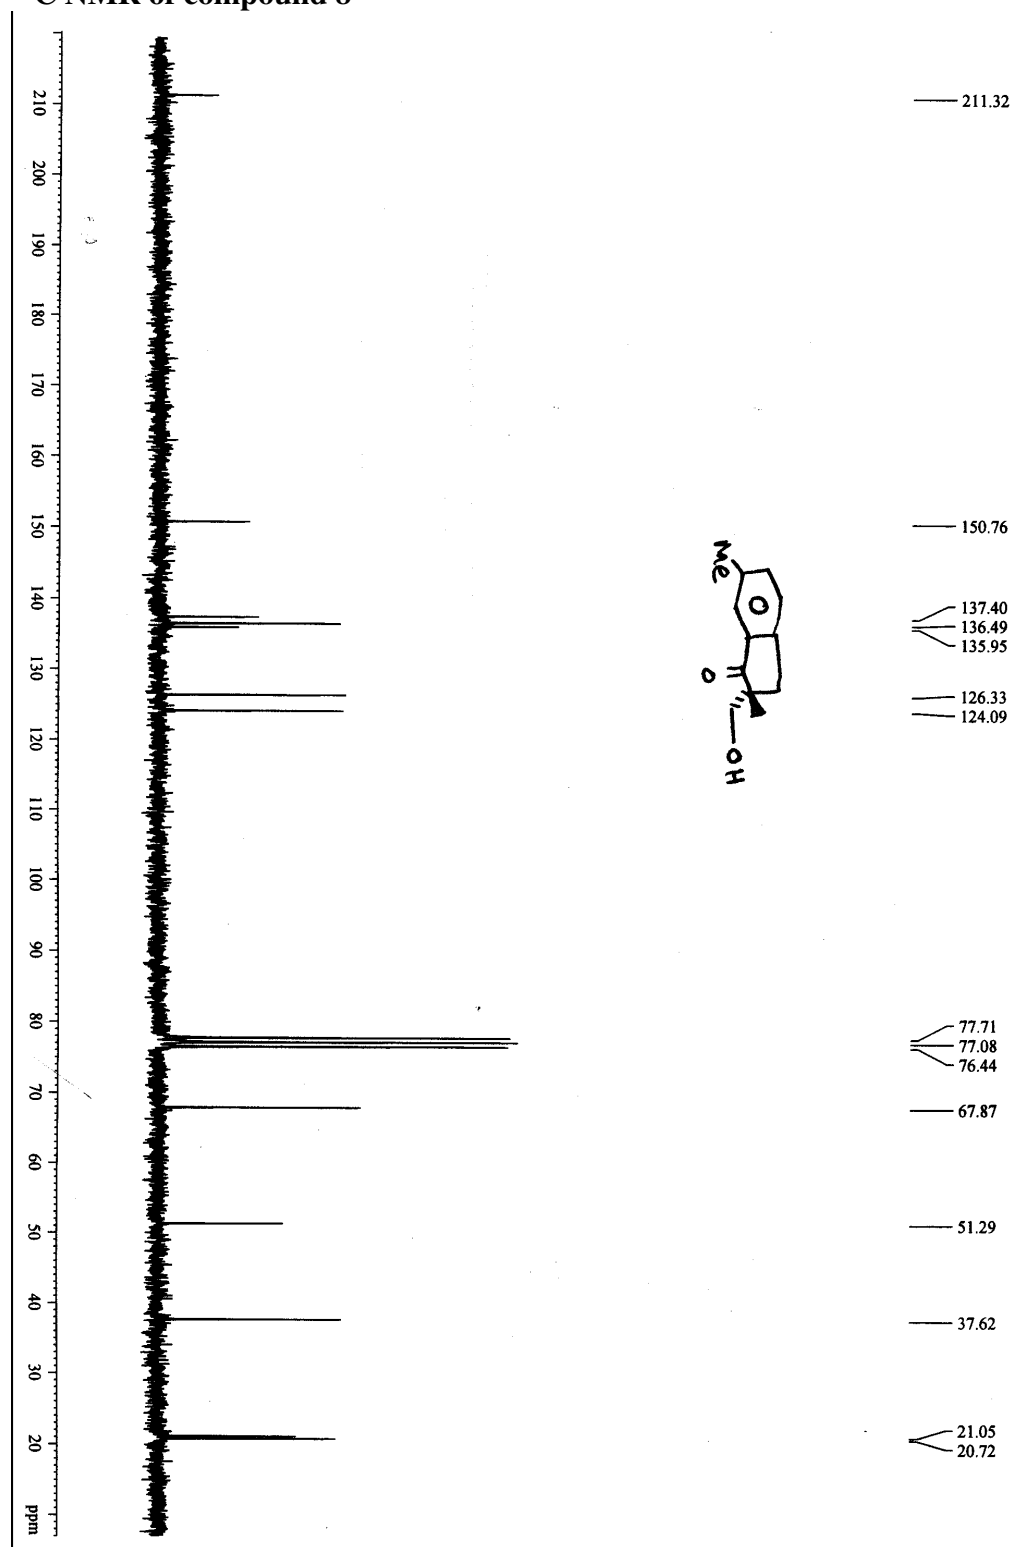

snc/rb/164  
C13CPD CDCl3 D:\ IITK 2

# <sup>1</sup>H NMR of acetate derivative of 8

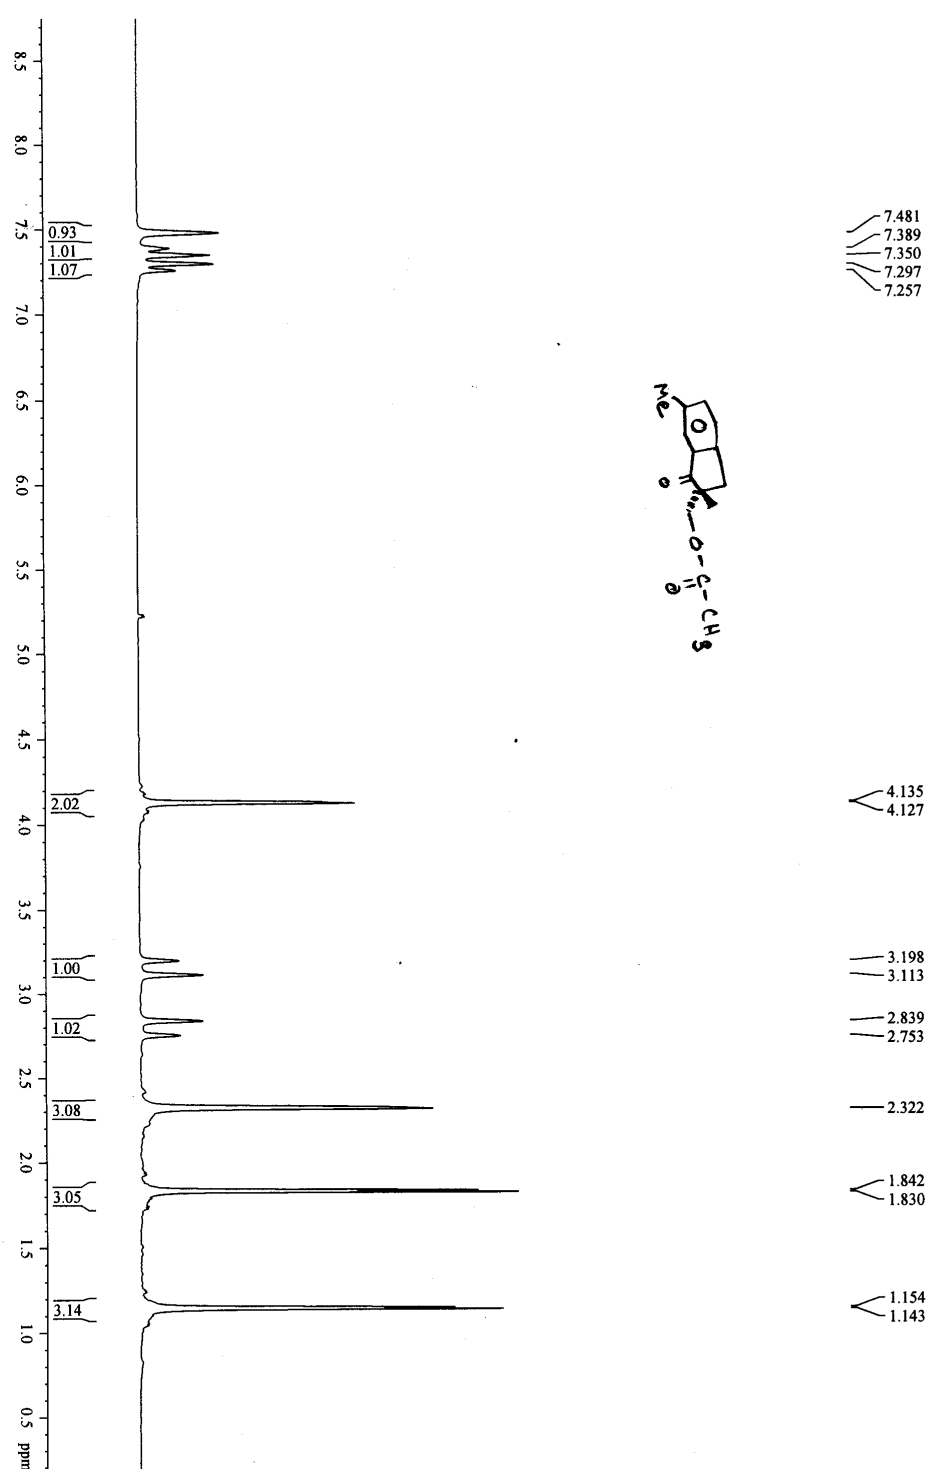

sn/rb/230-b

# <sup>13</sup>C NMR of acetate derivative of 8

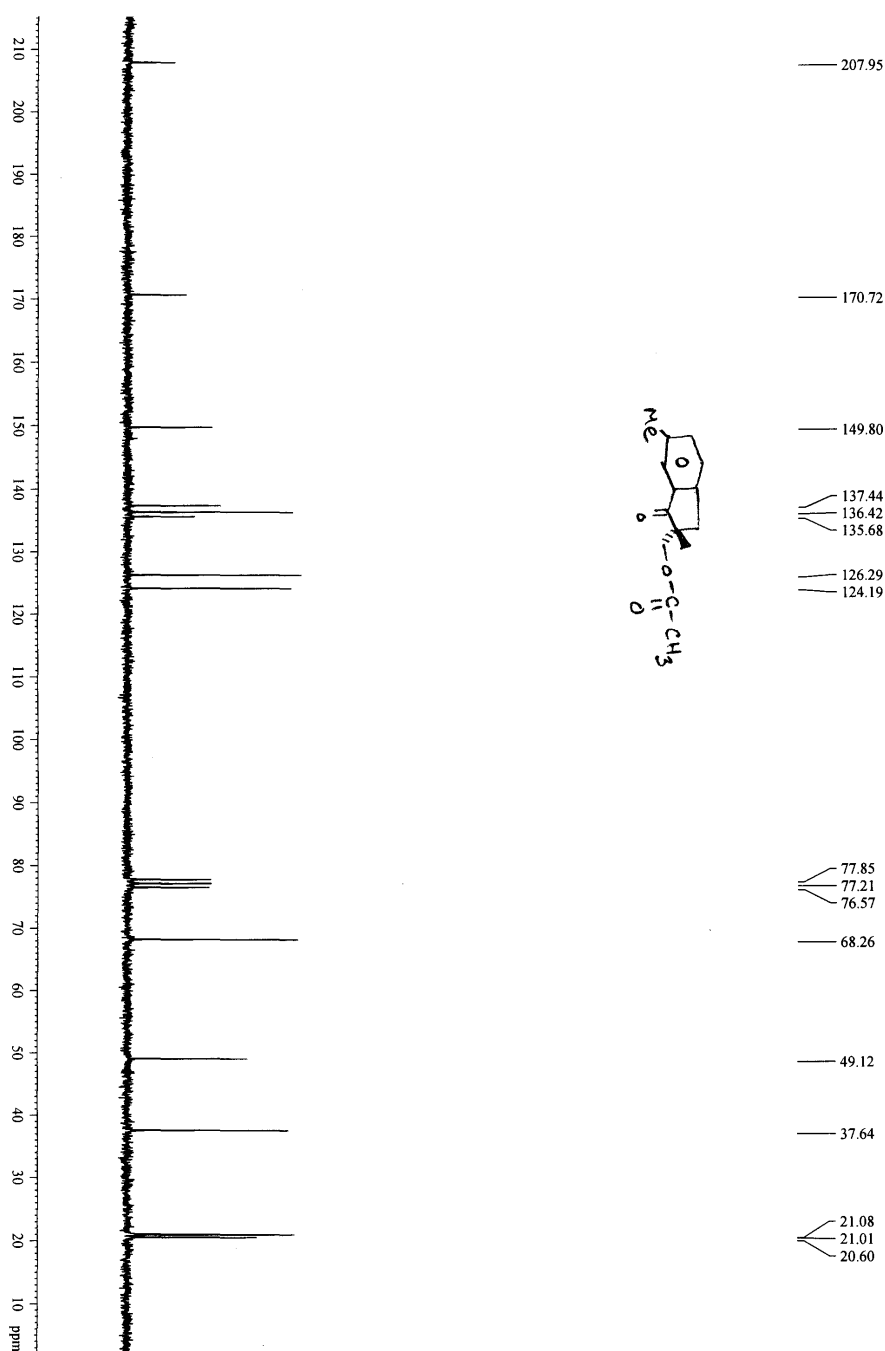

snc/rb/230-b  
C13CPD CDCl3 D:\ IITK 2

# <sup>1</sup>H NMR of compound 9

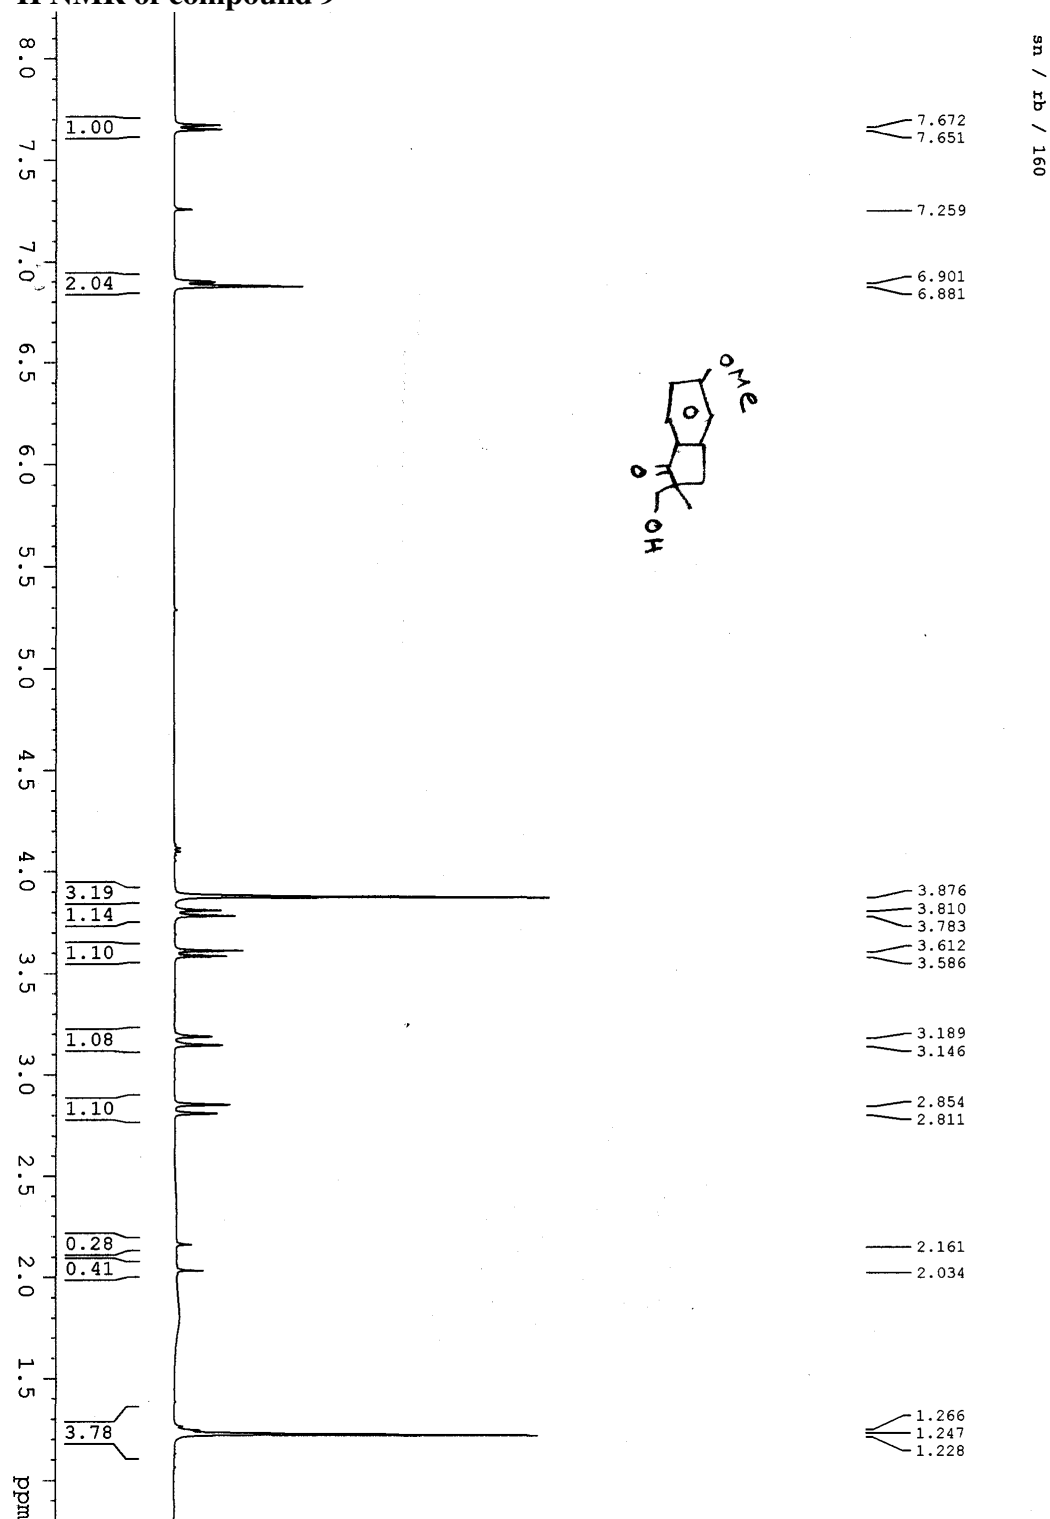



# <sup>13</sup>C NMR of compound 9

sn / rb / rn - 160 - 13c

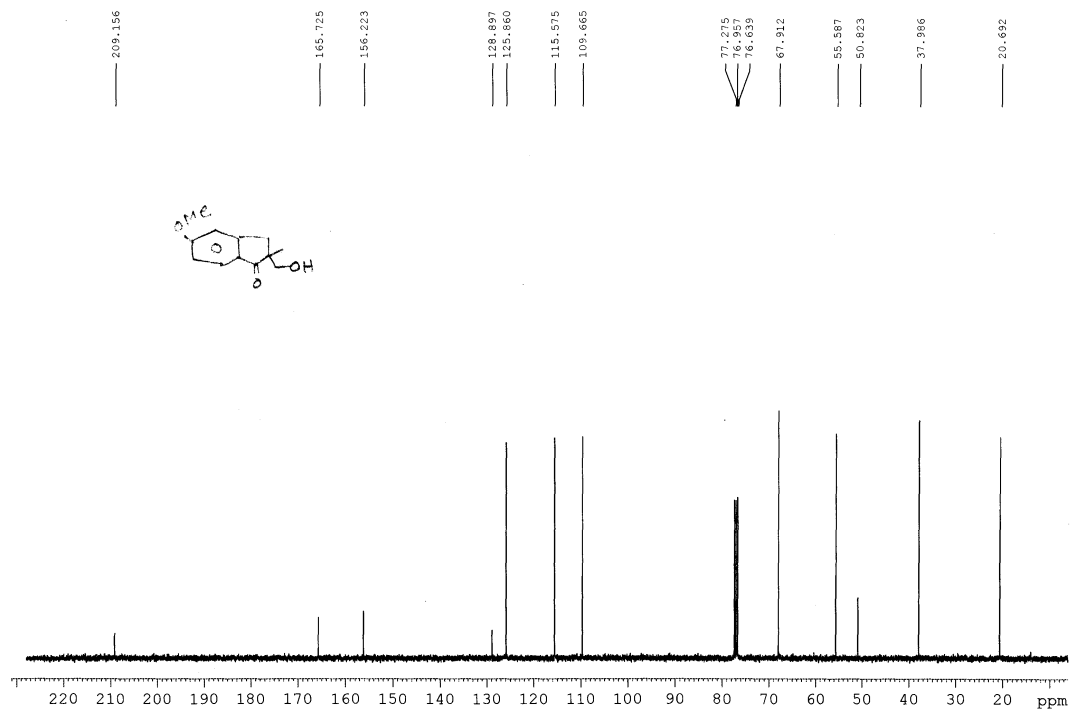

# <sup>1</sup>H NMR of acetate derivative of 9

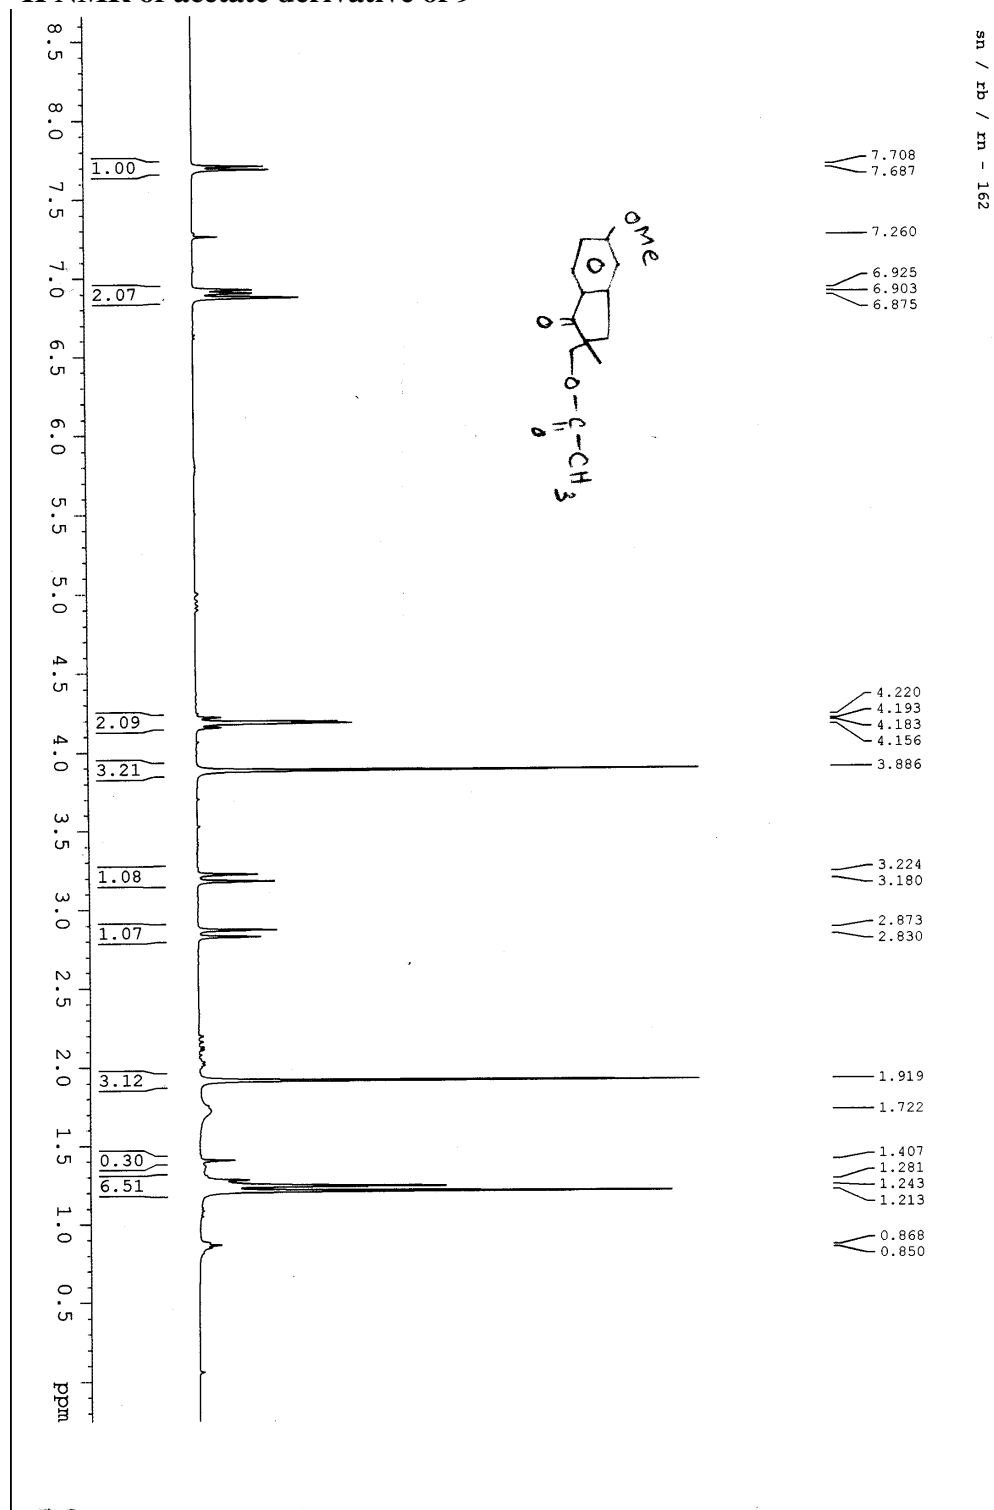

# <sup>13</sup>C NMR of acetate derivative of 9

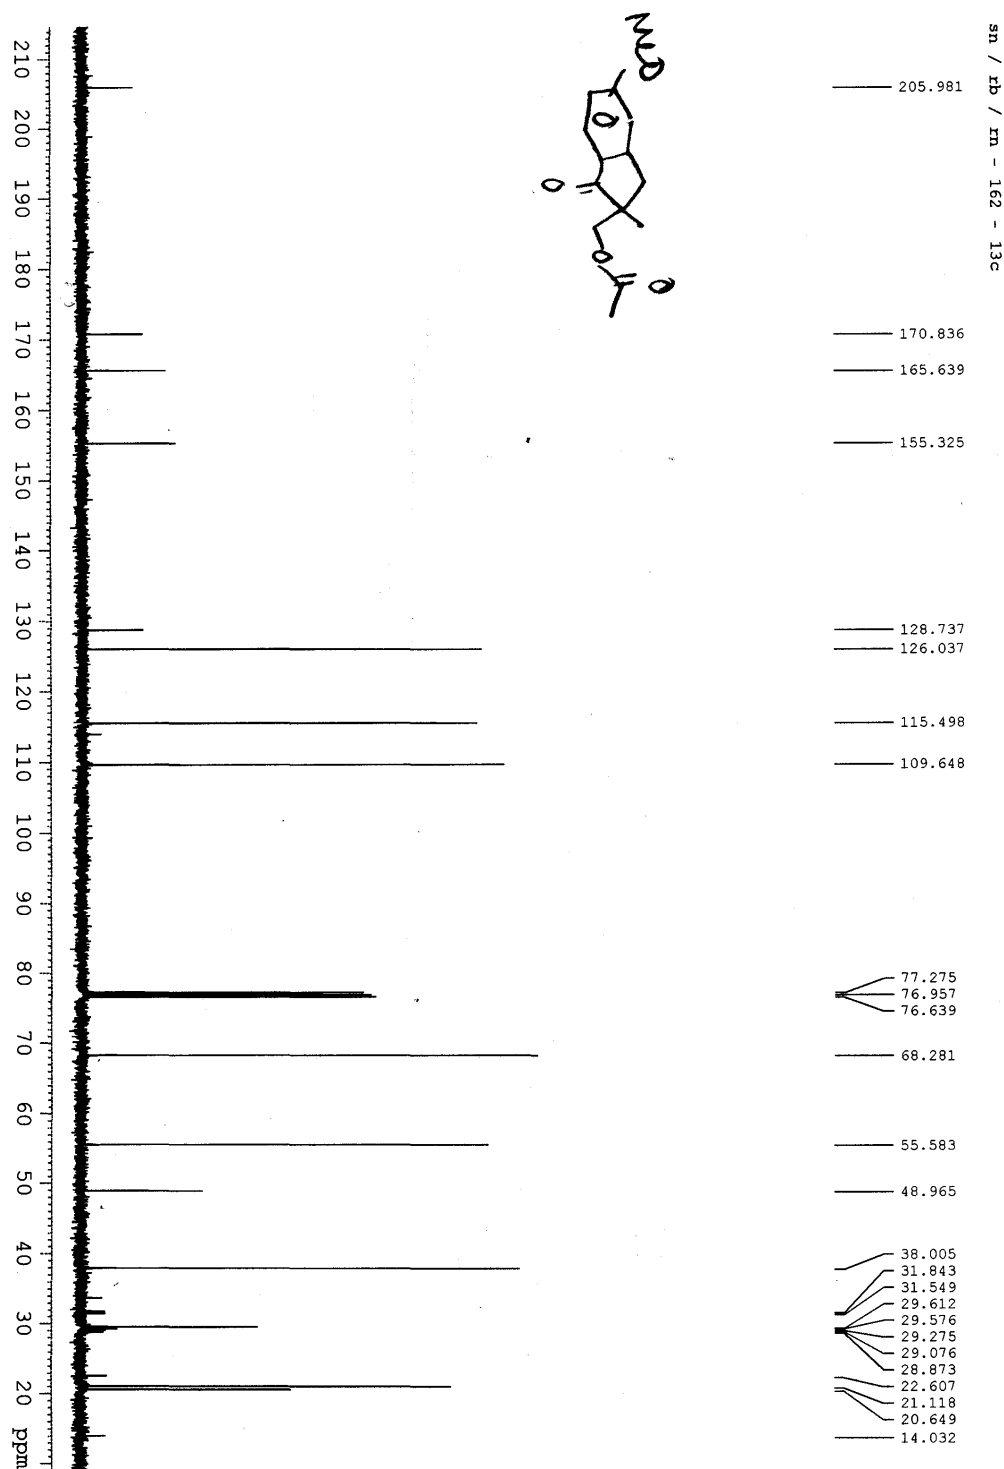

# <sup>1</sup>H NMR of compound 10

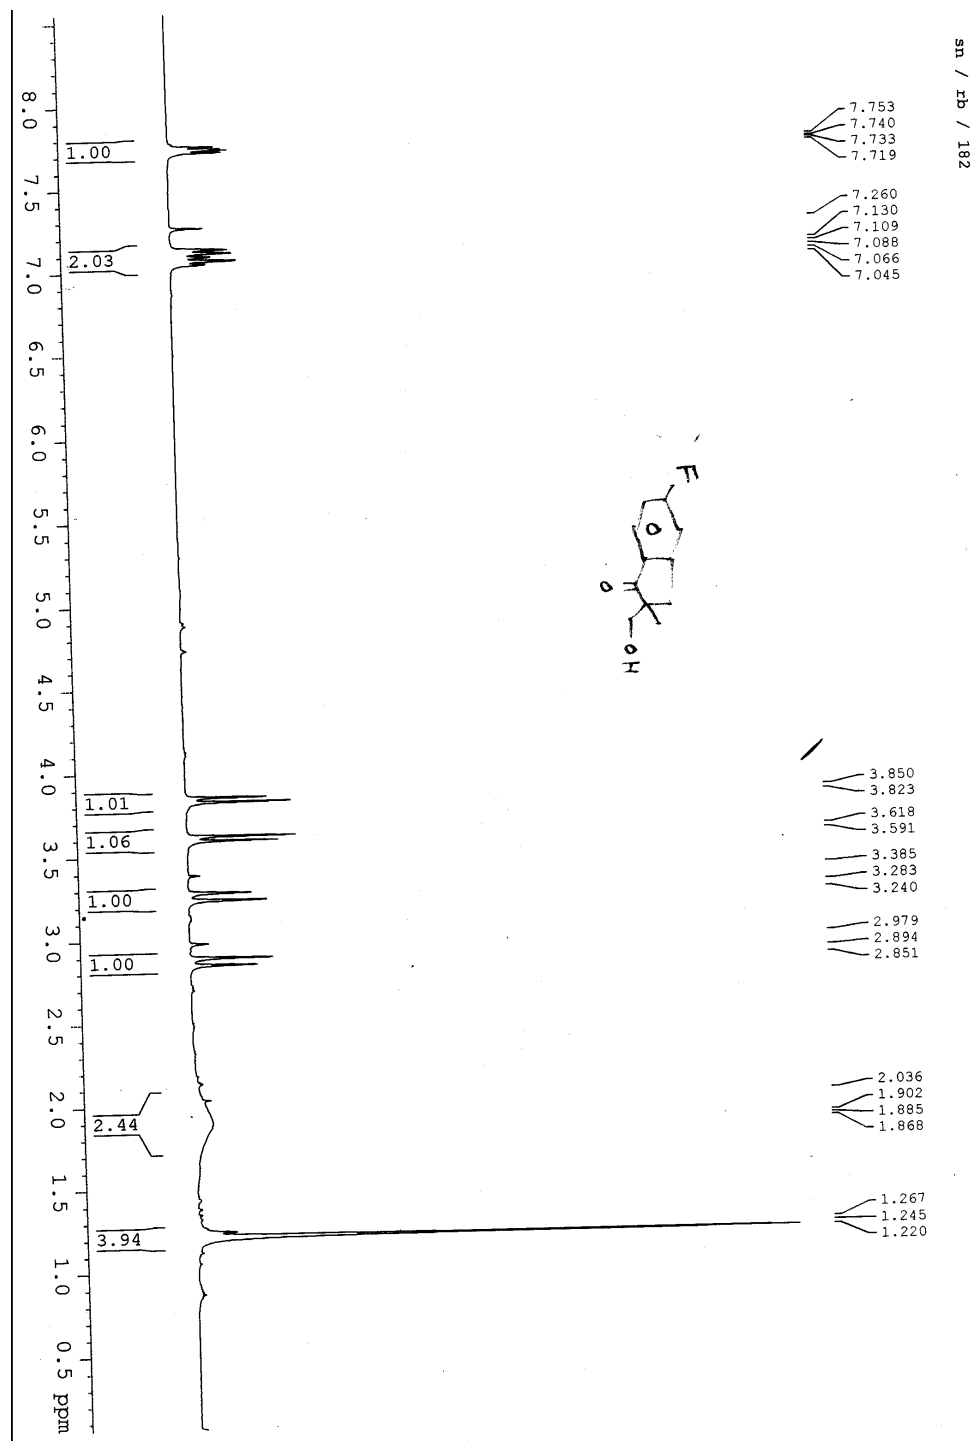

# <sup>13</sup>C NMR of compound 10

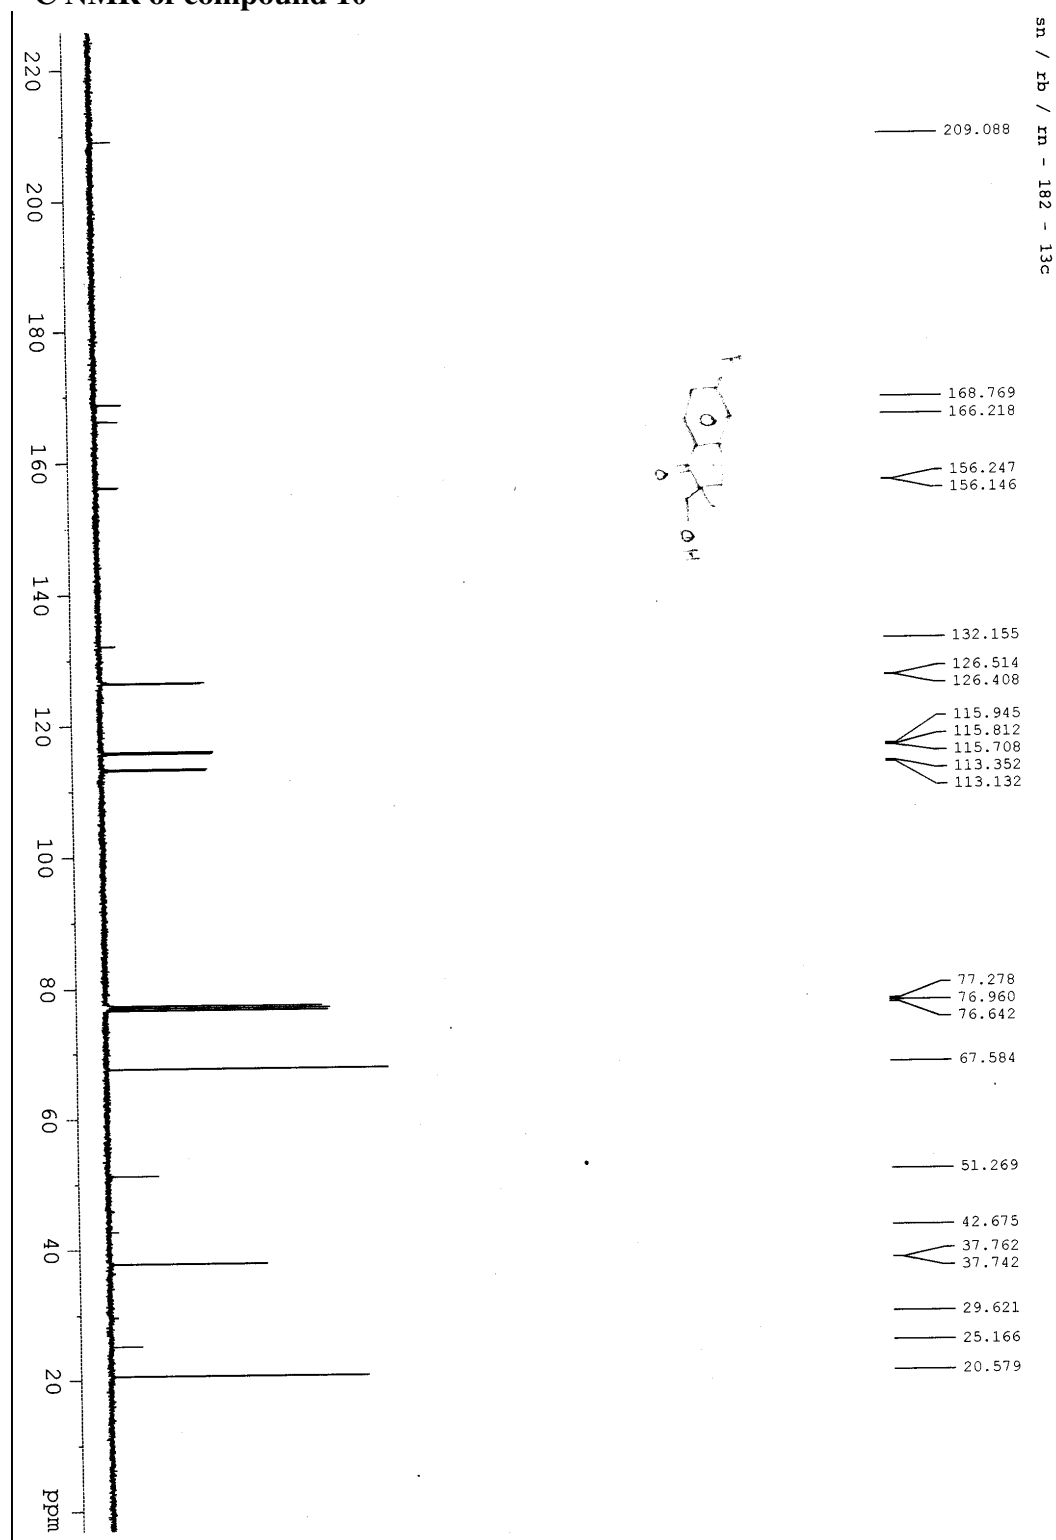

**<sup>1</sup>H NMR of acetate derivative of compound 10**

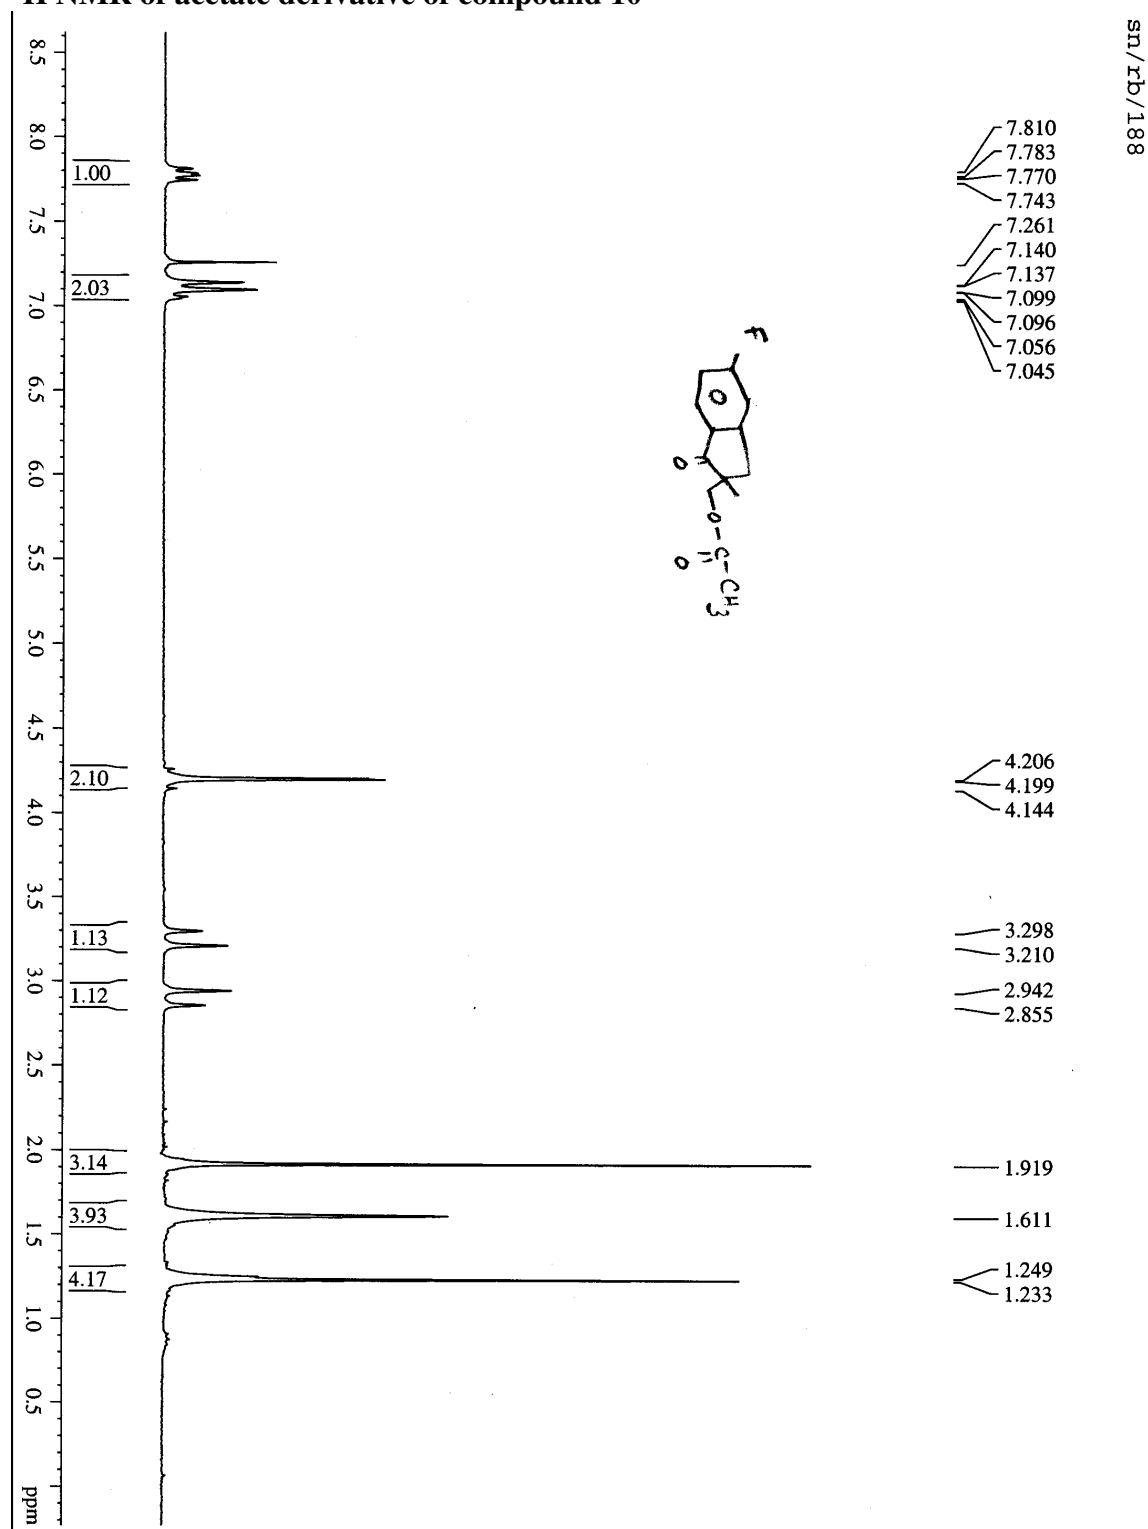

# <sup>13</sup>C NMR of acetate derivative of compound 10

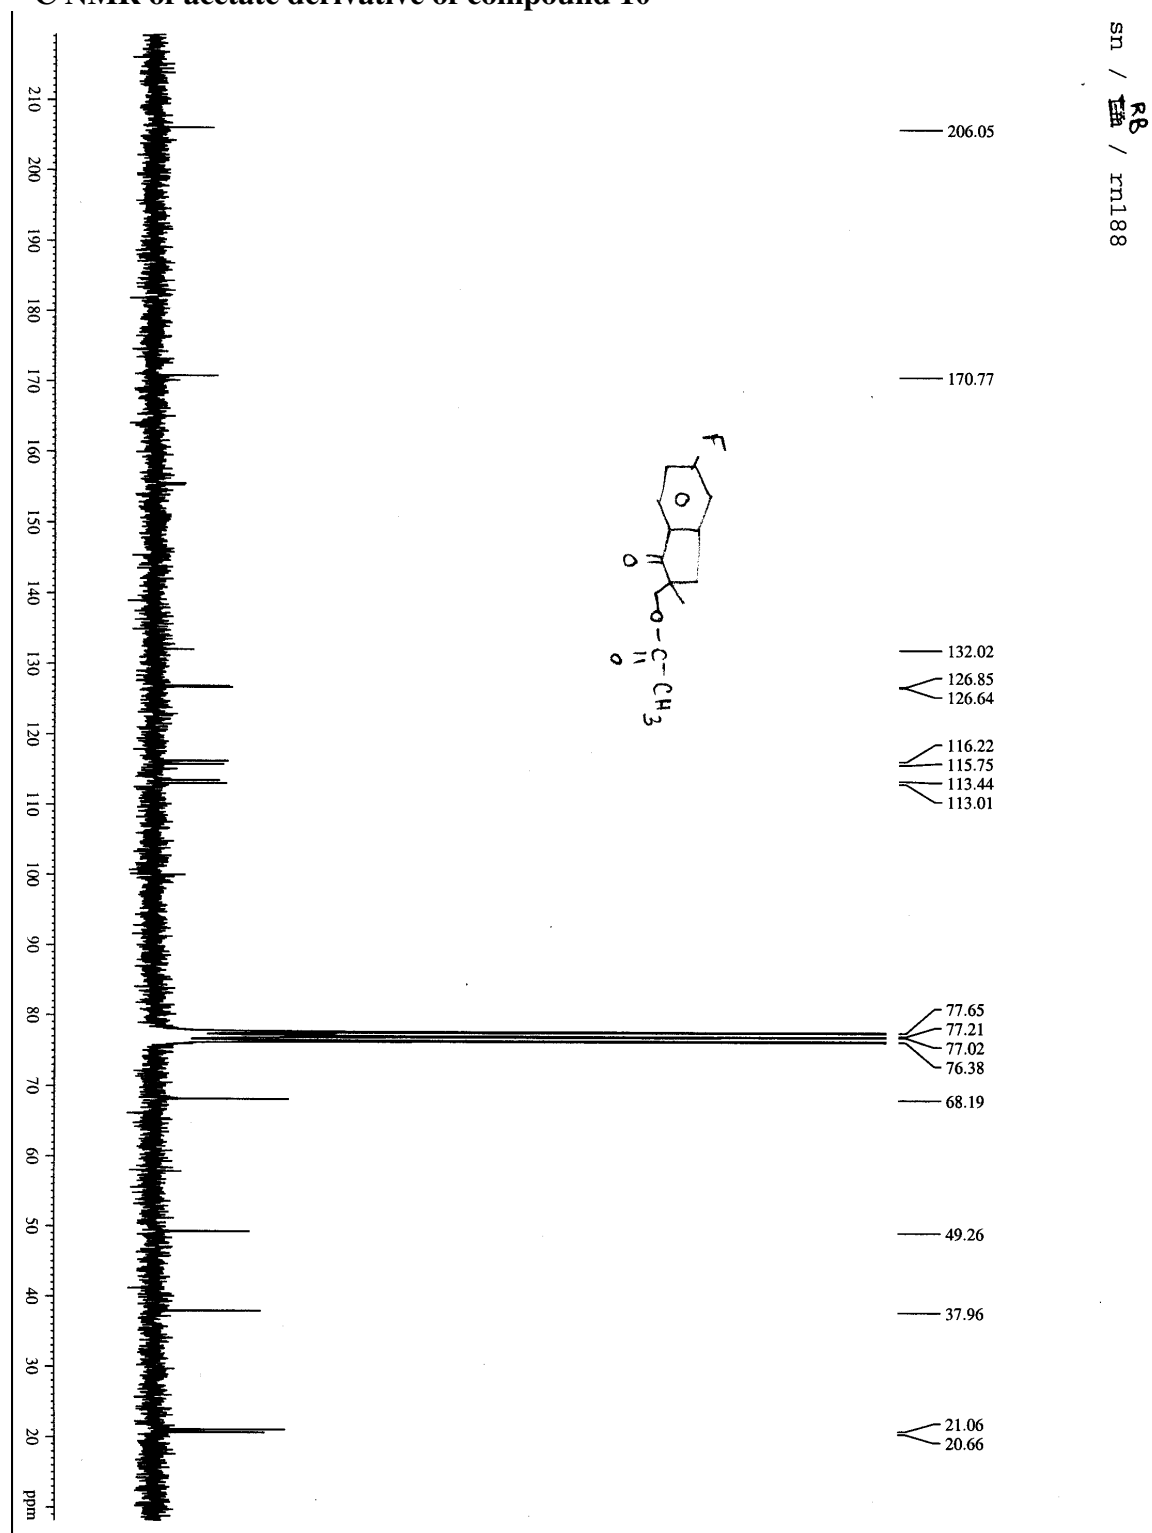

# <sup>1</sup>H NMR of compound 11

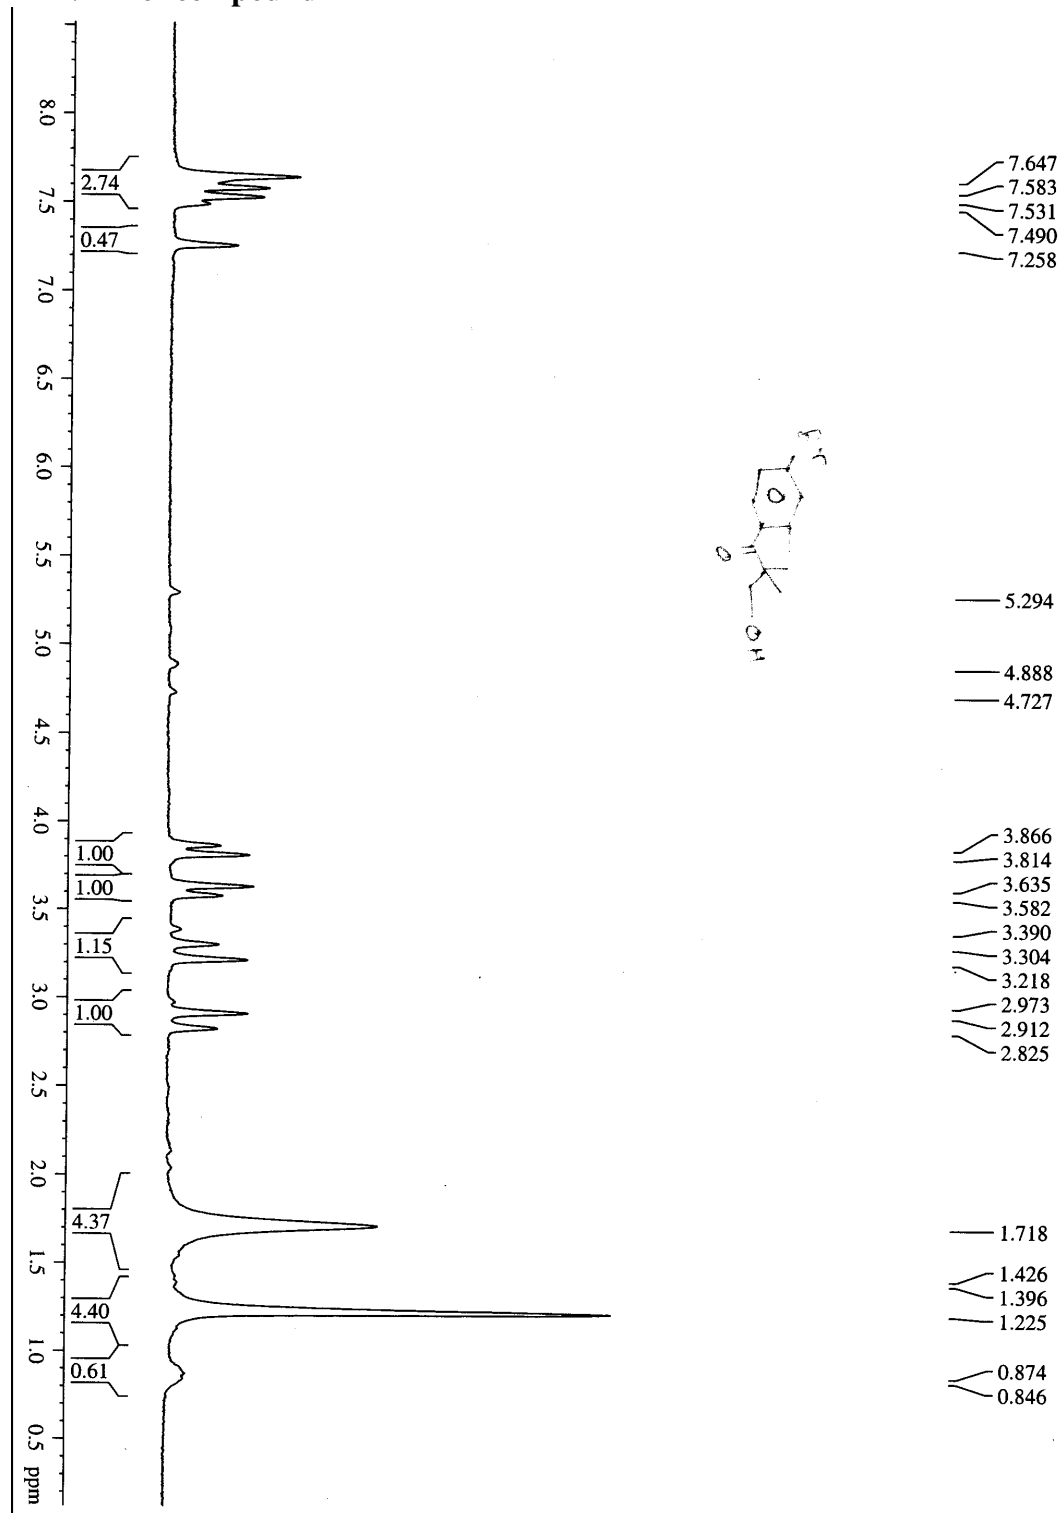

sn/rb/179



# <sup>13</sup>C NMR of compound 11

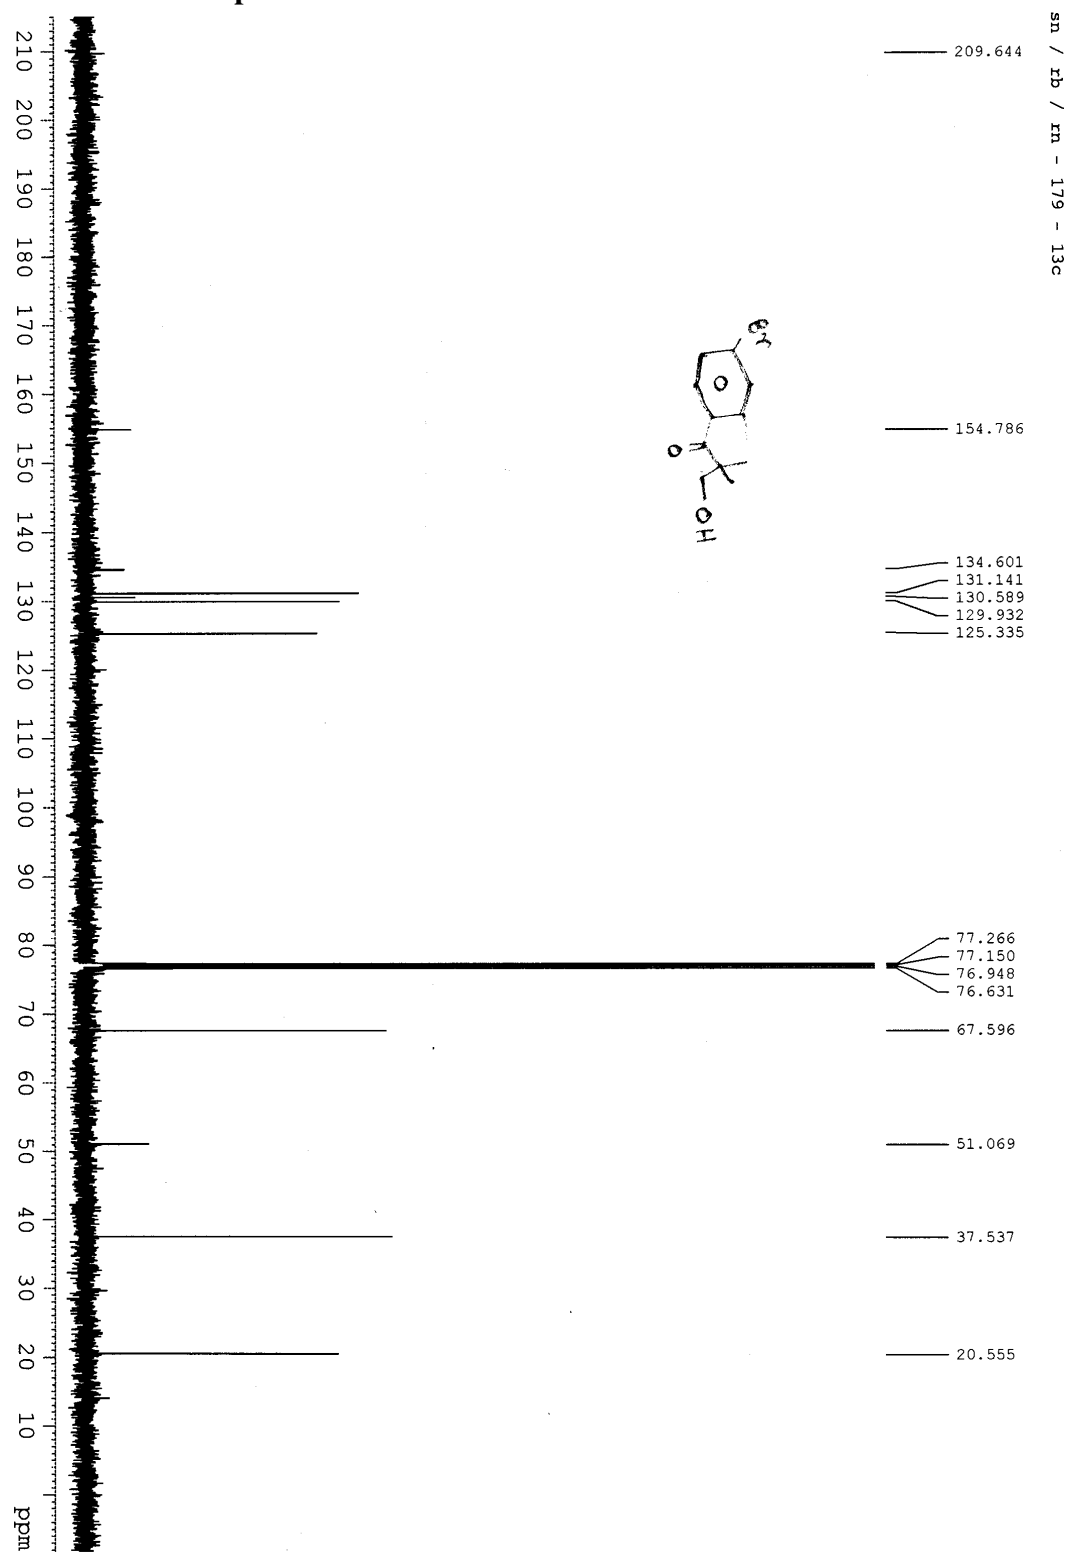

# <sup>1</sup>H NMR of acetate derivative of 11

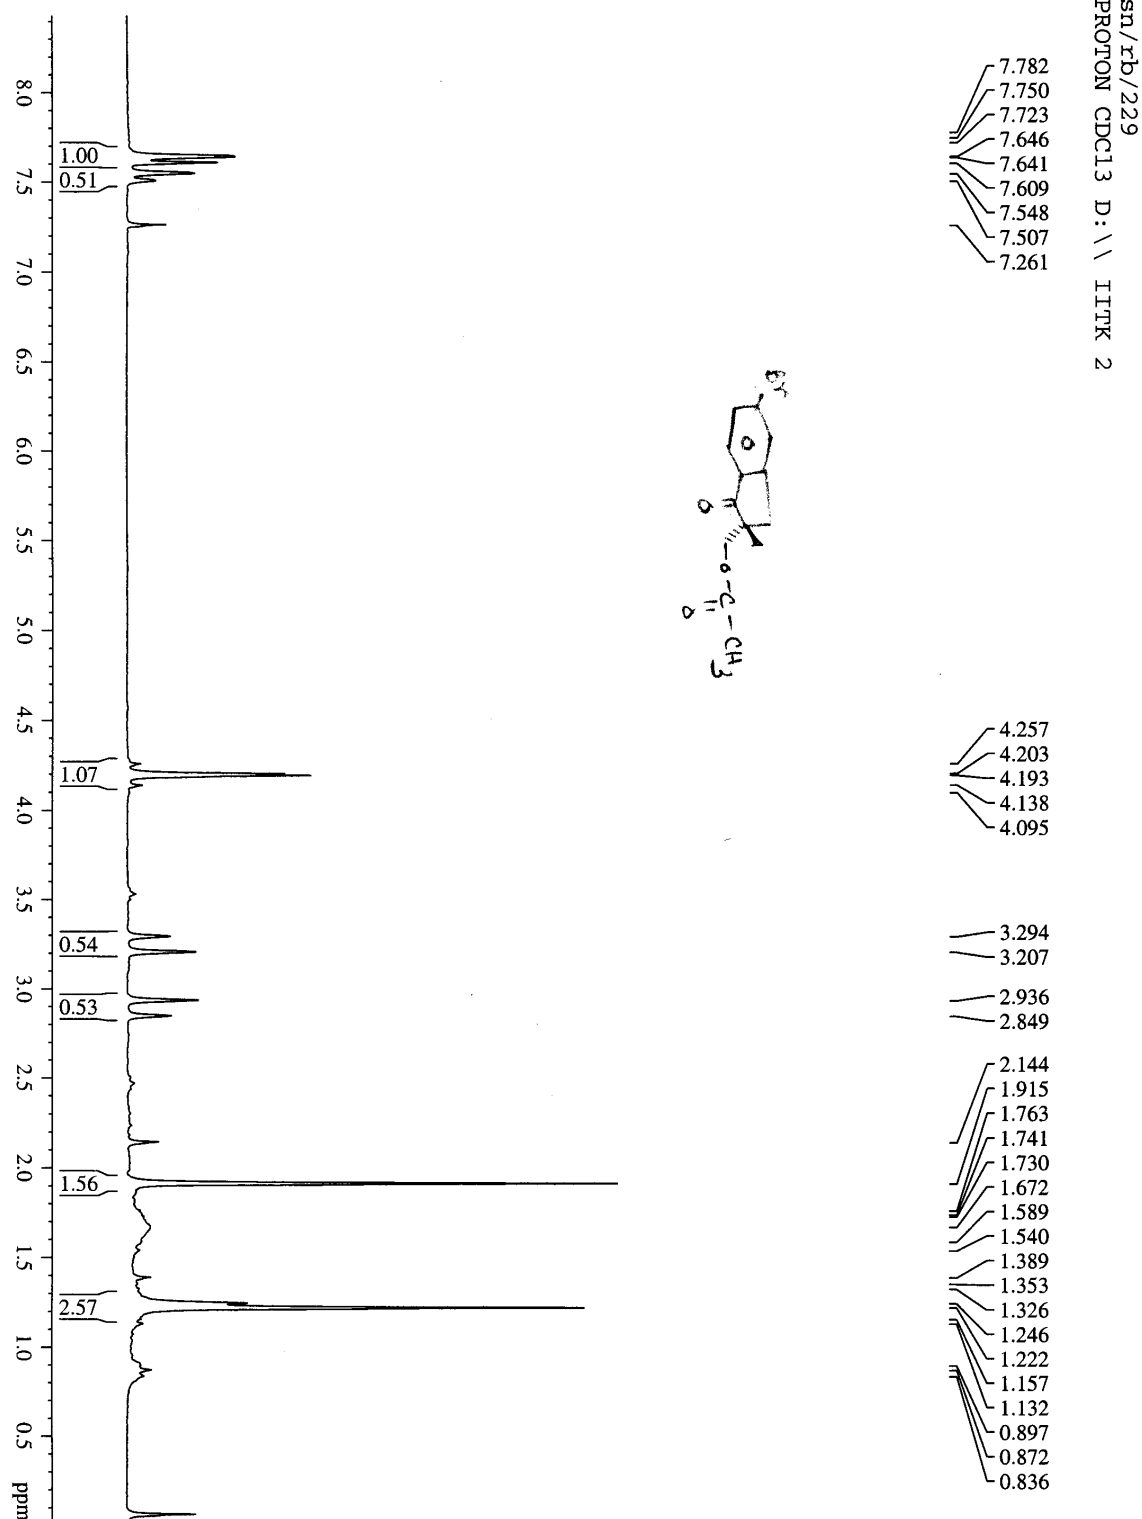

# <sup>13</sup>C NMR of acetate derivative of 11

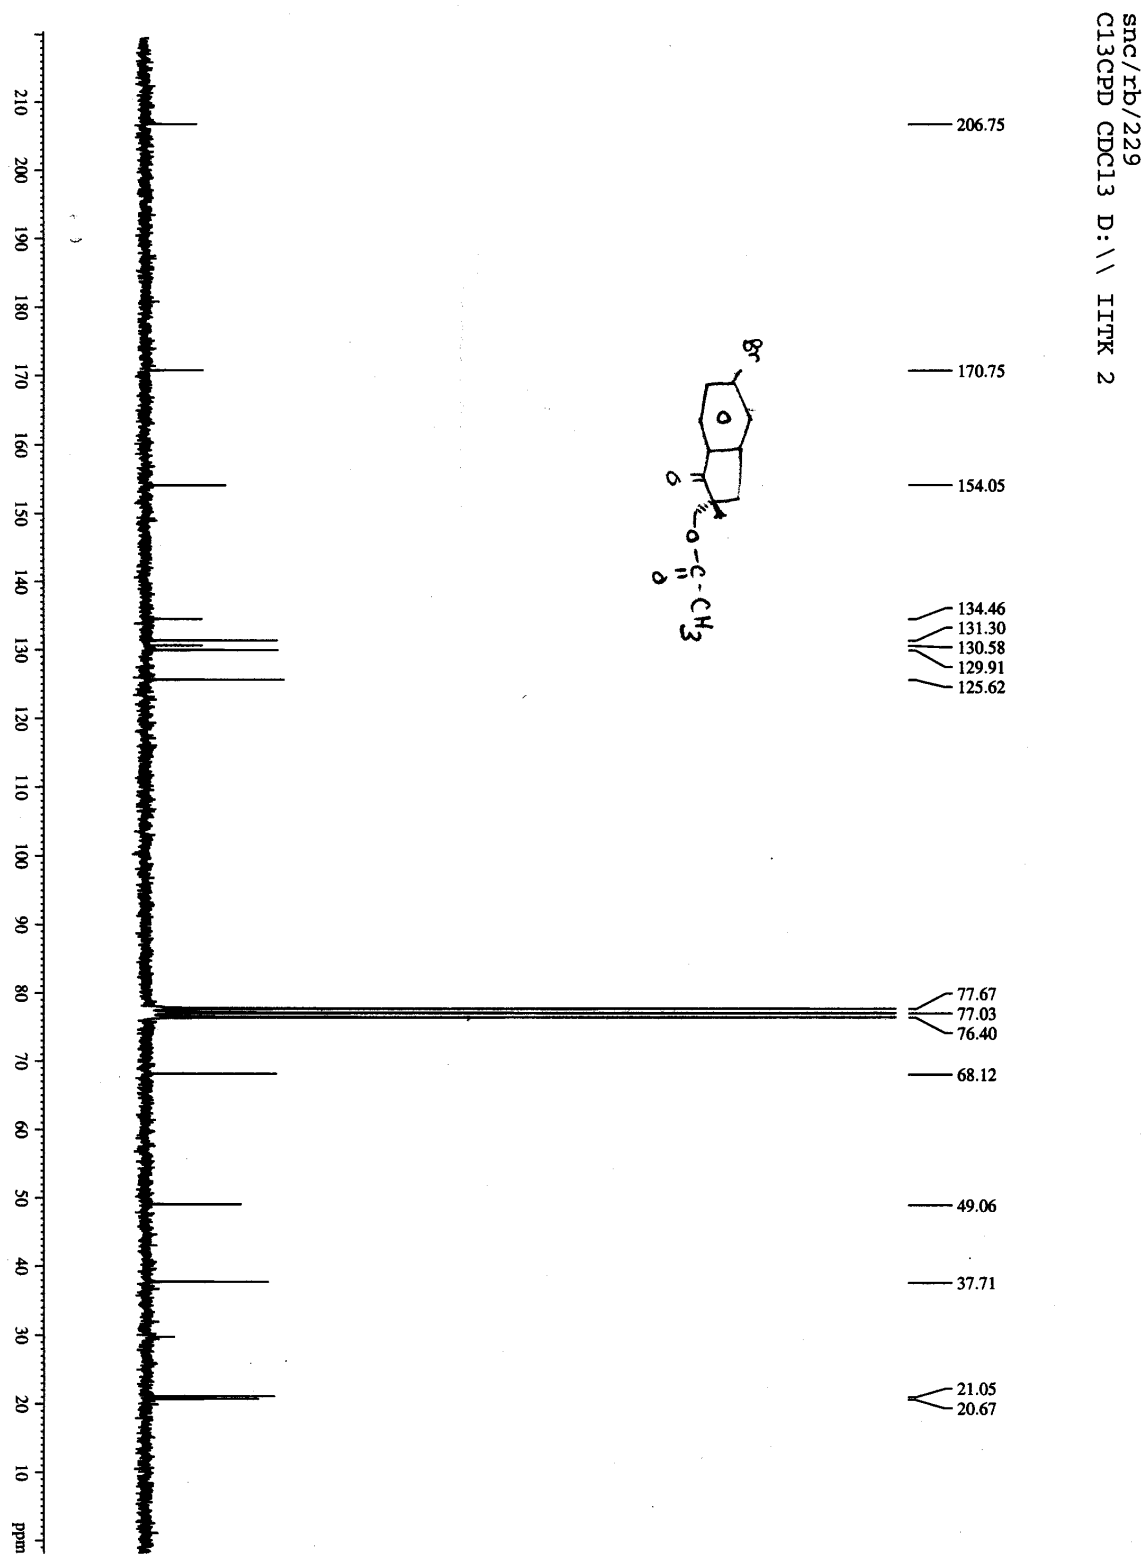

# <sup>1</sup>H NMR of compound 12

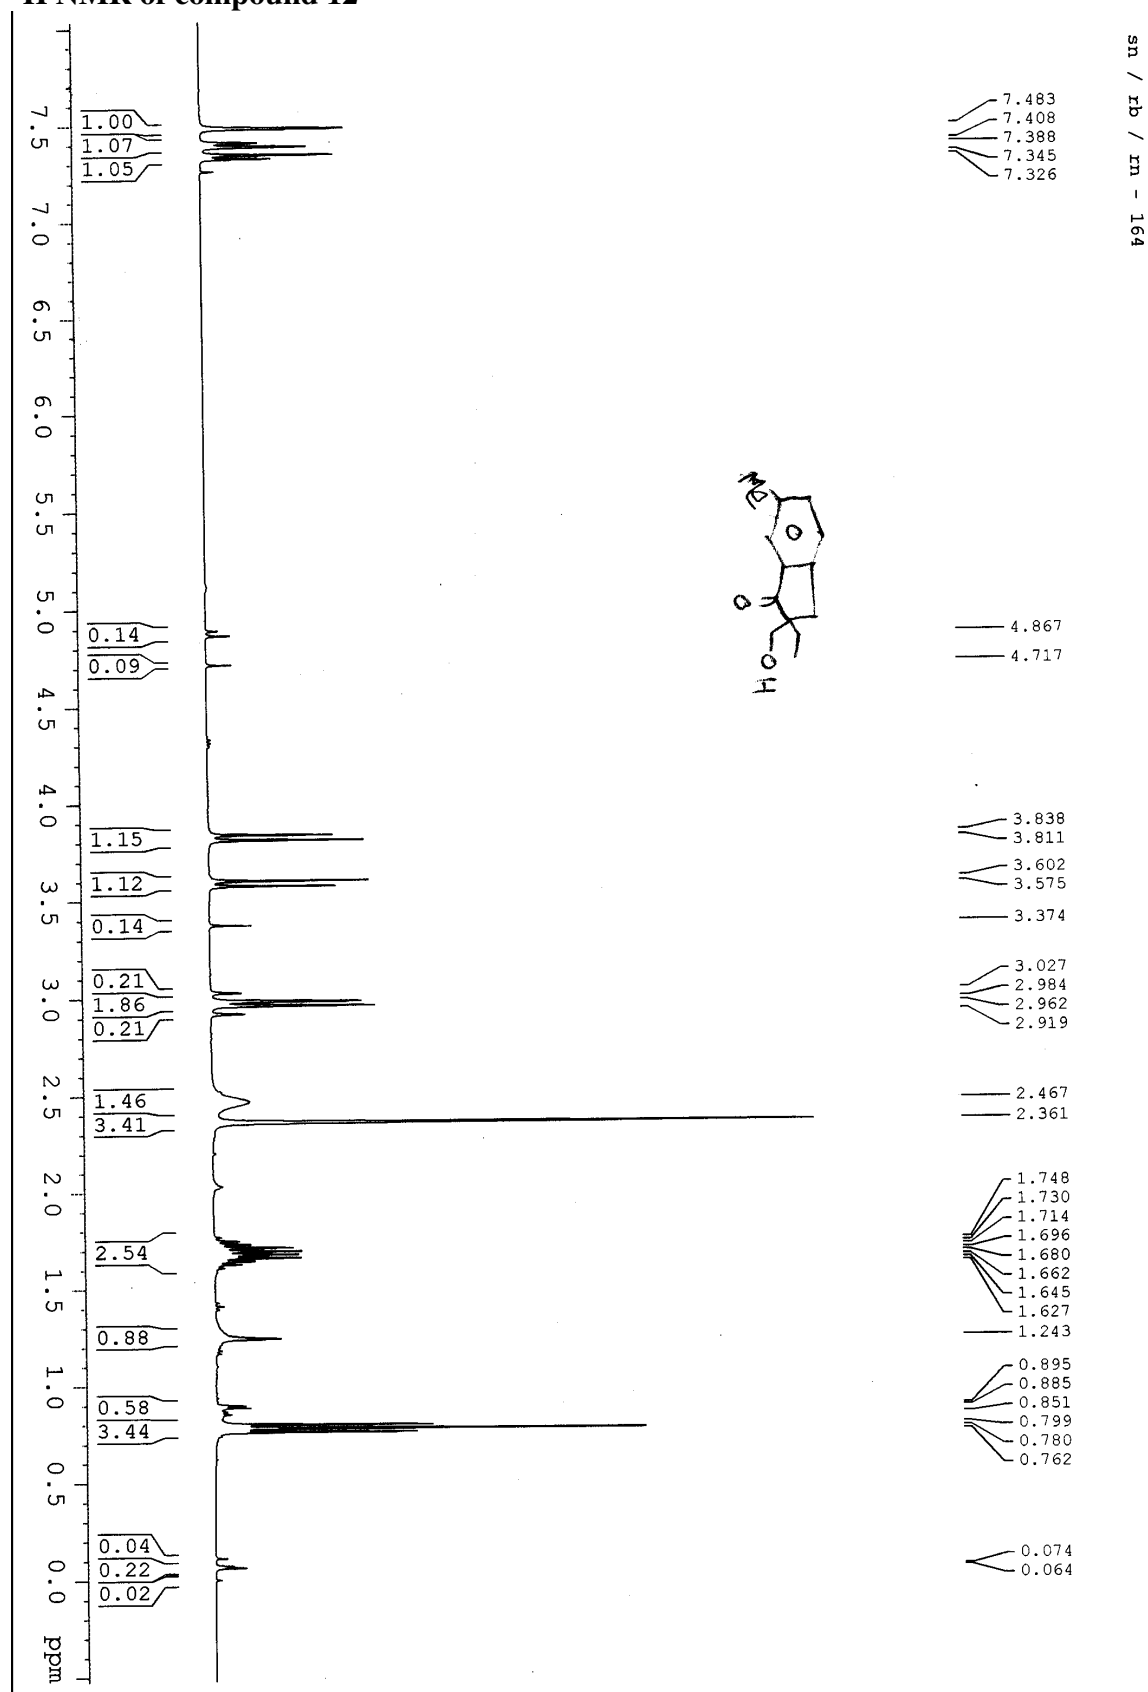

# <sup>13</sup>C NMR of compound 12

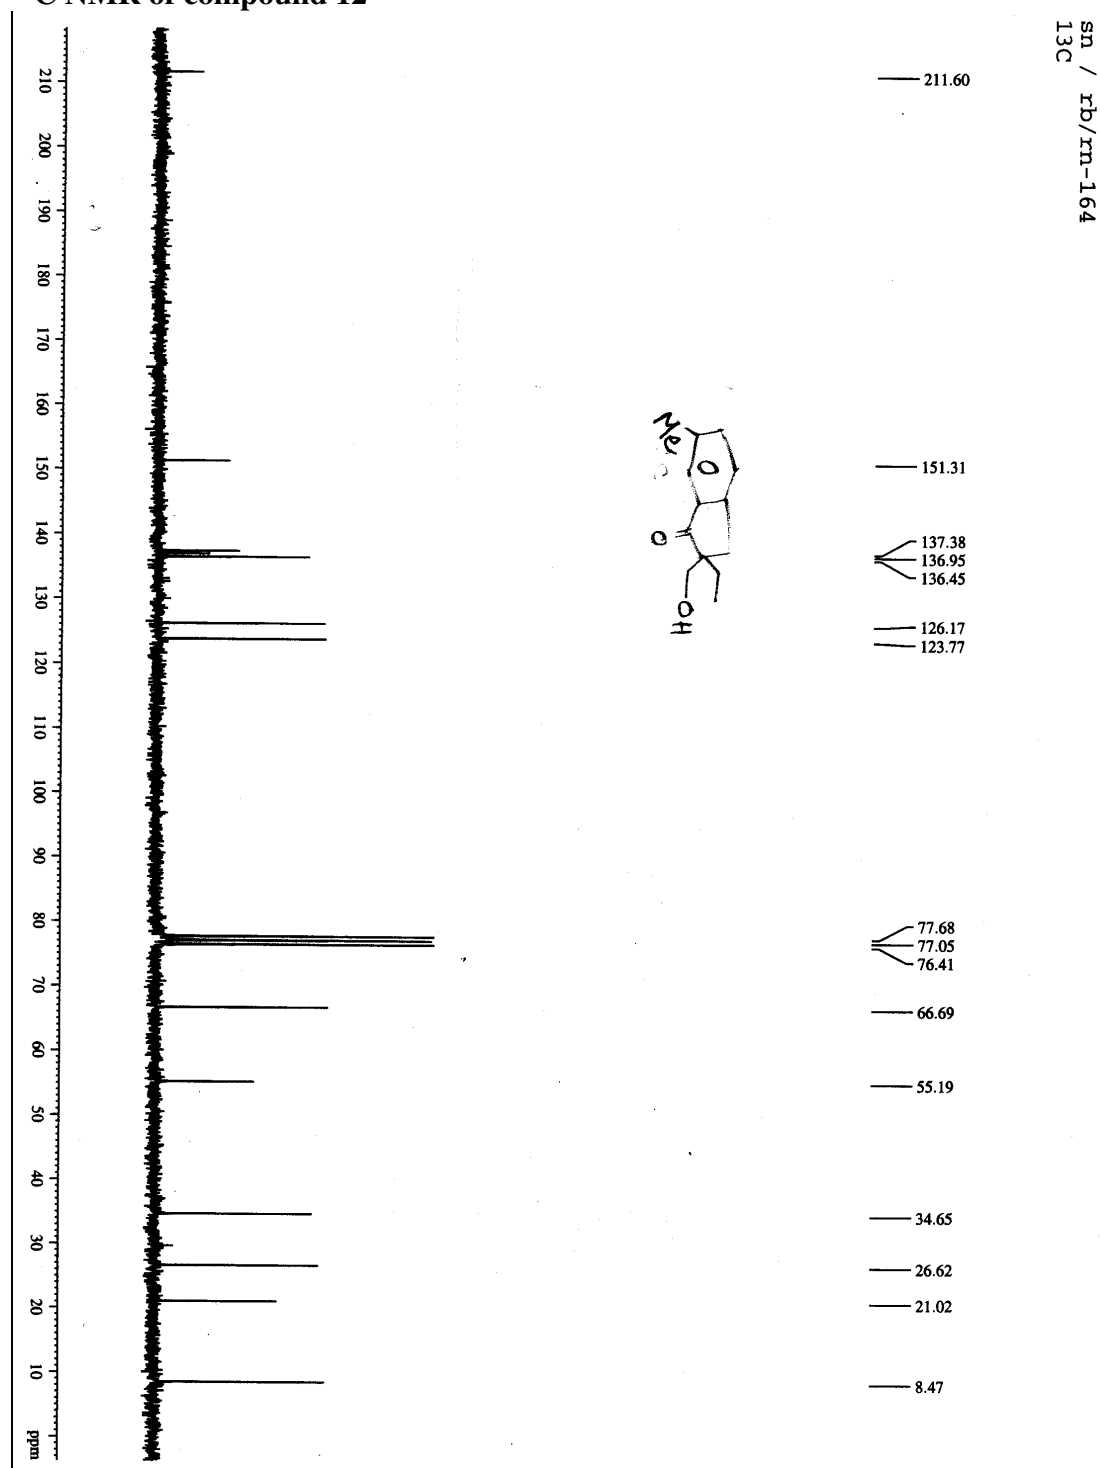

**<sup>1</sup>H NMR of acetate derivative of 12**

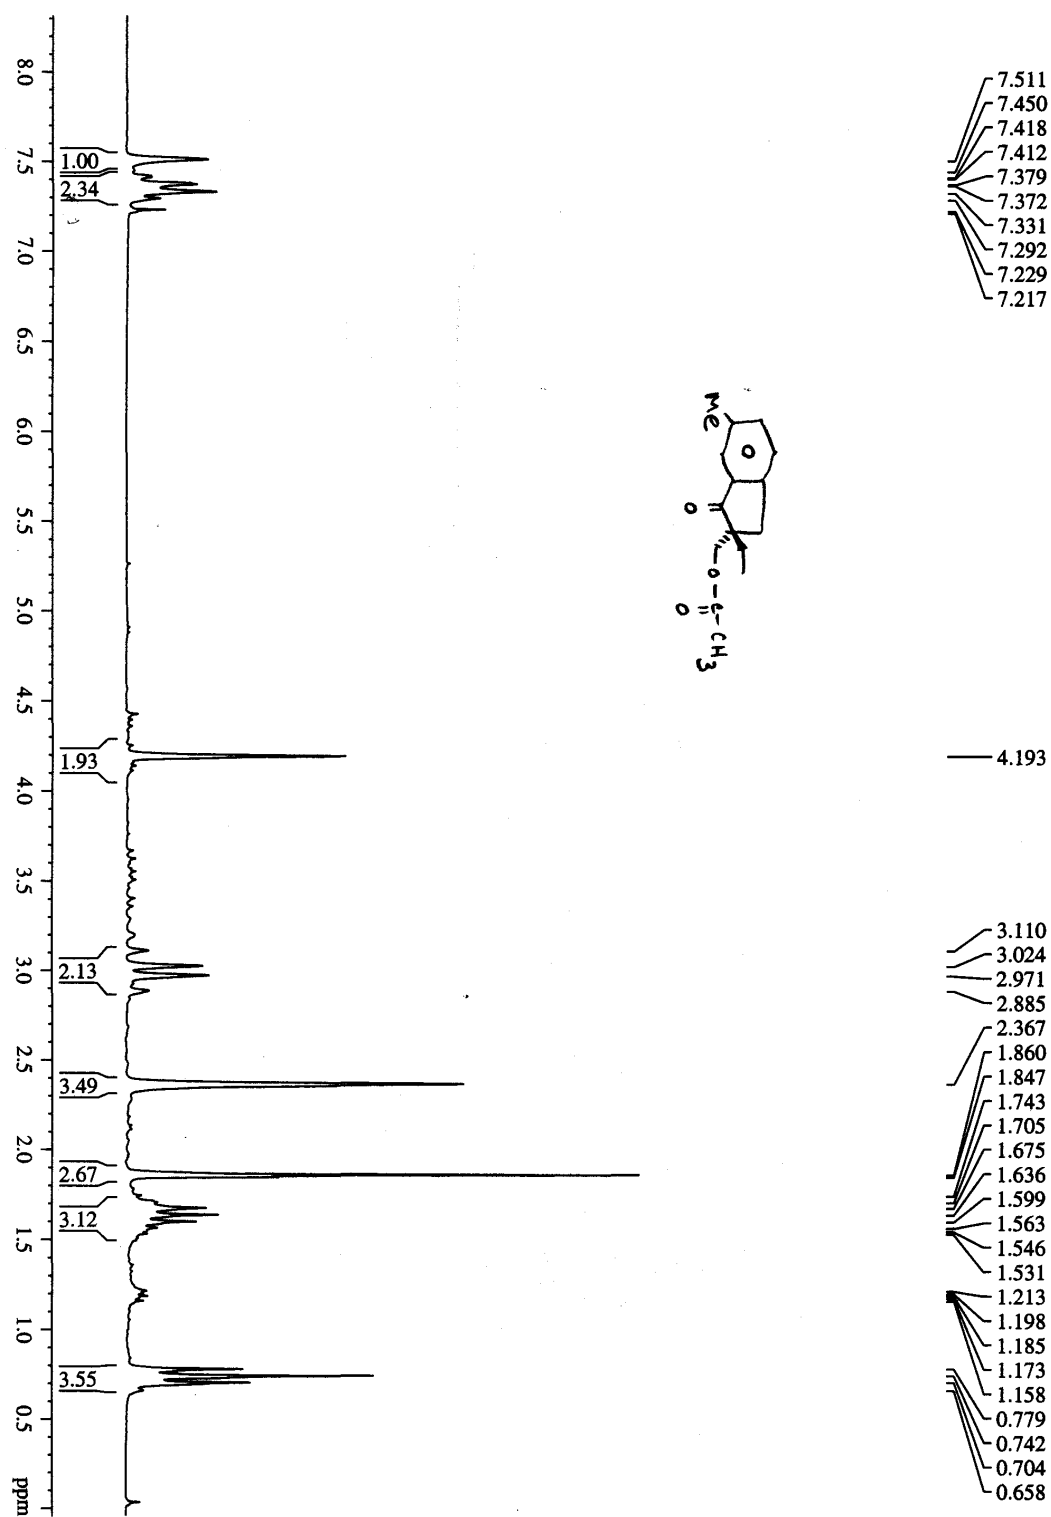

# <sup>13</sup>C NMR of acetate derivative of 12

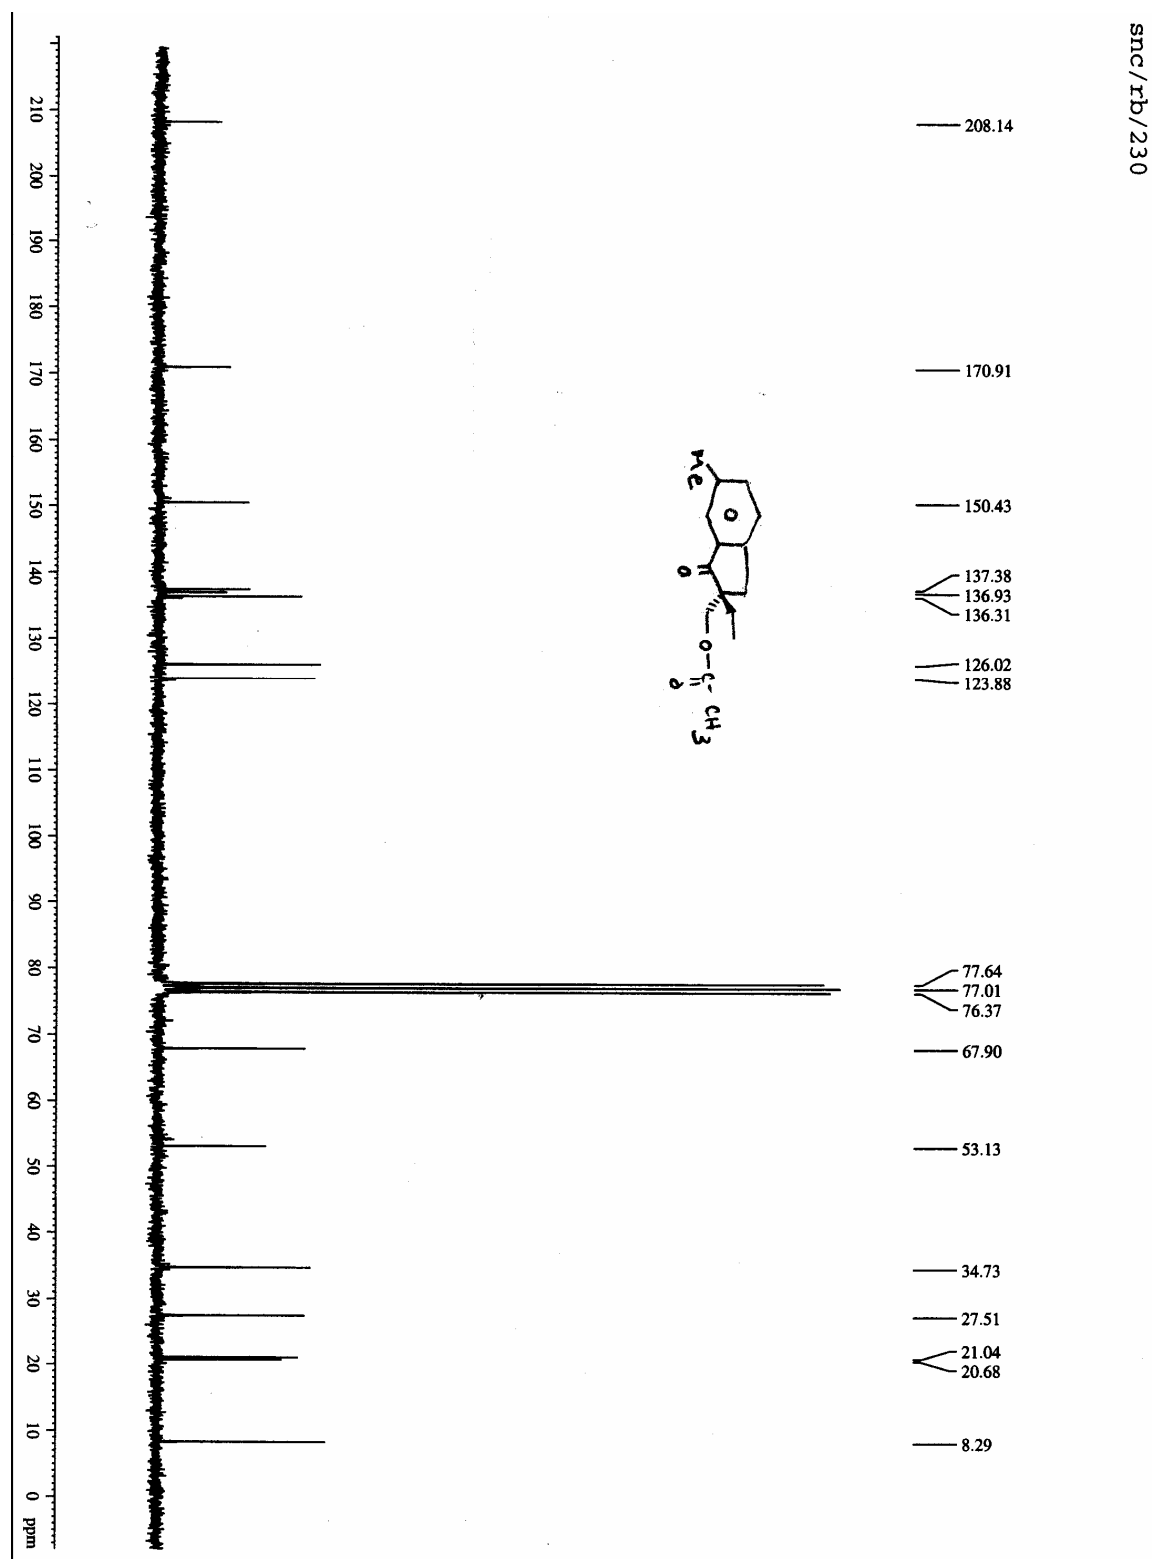

<sup>1</sup>H NMR spectrum of 17

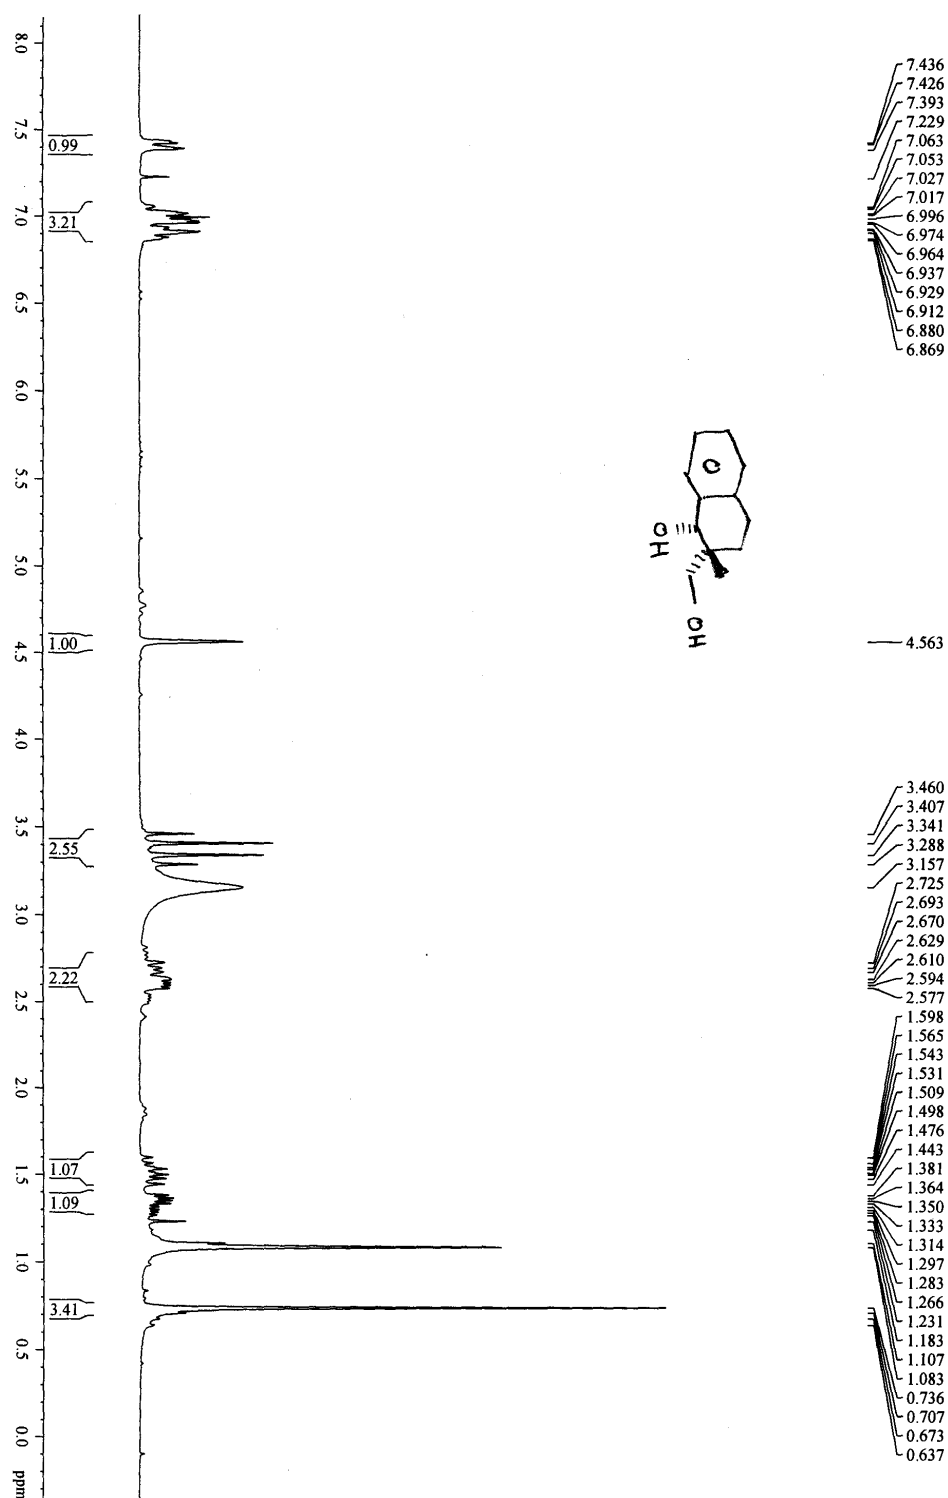

sn/rb/316



<sup>13</sup>C NMR spectrum of 17

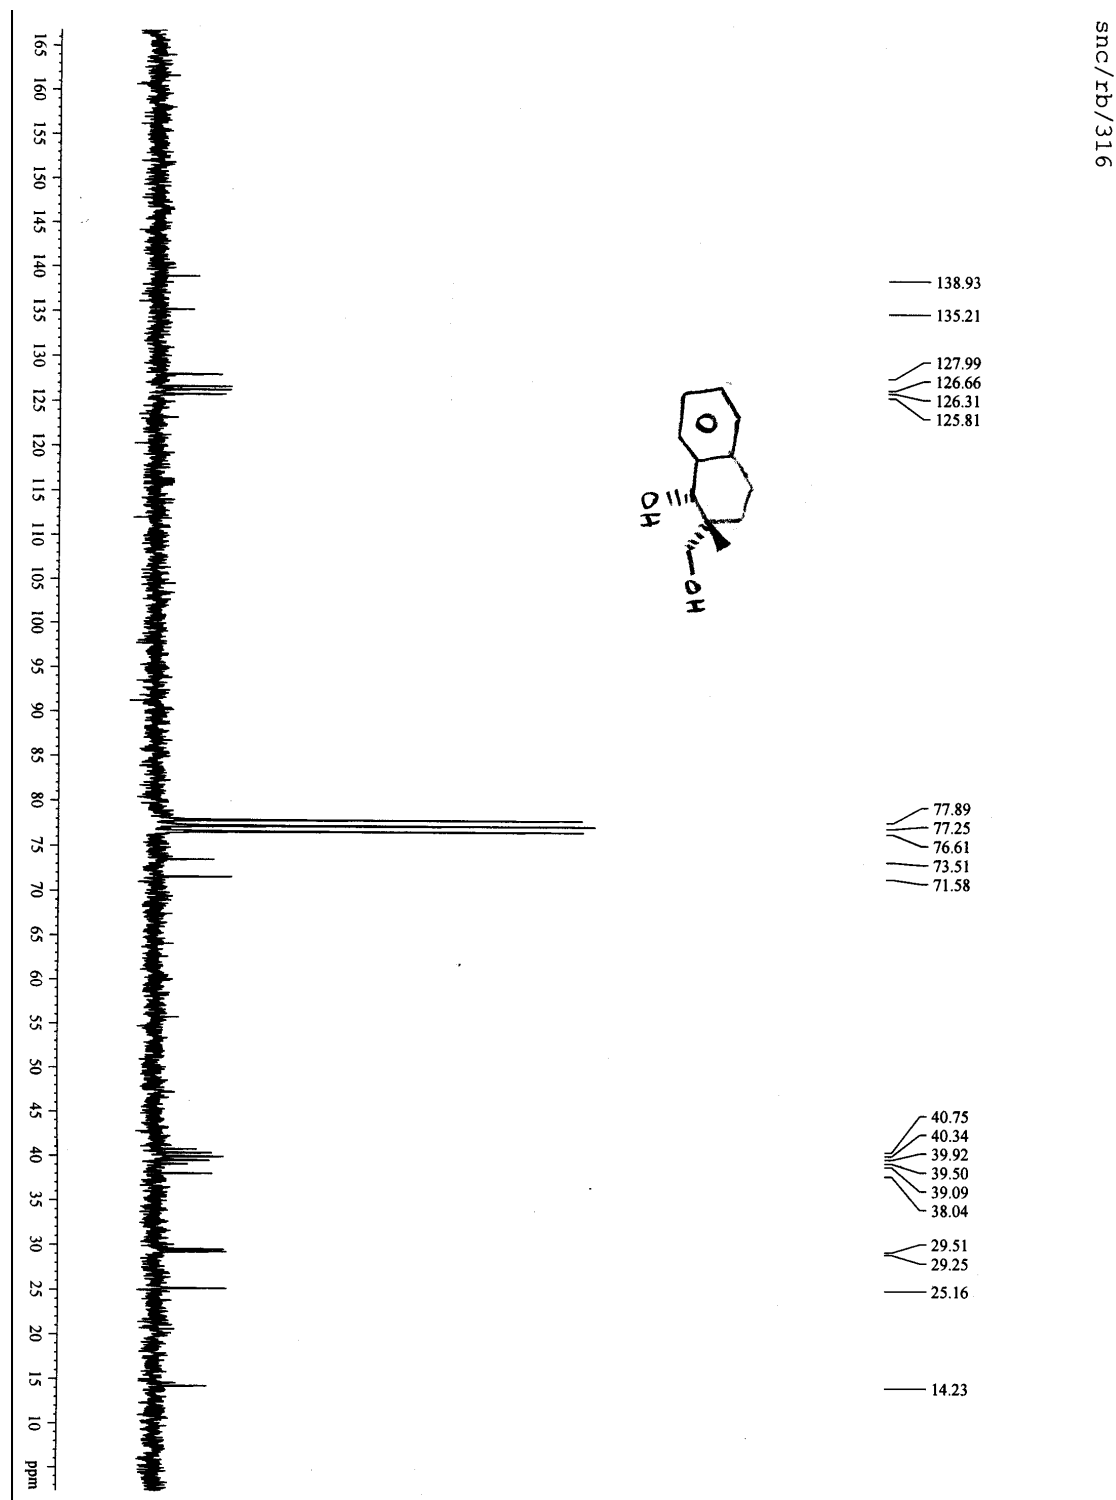

<sup>1</sup>H NMR spectrum of 18

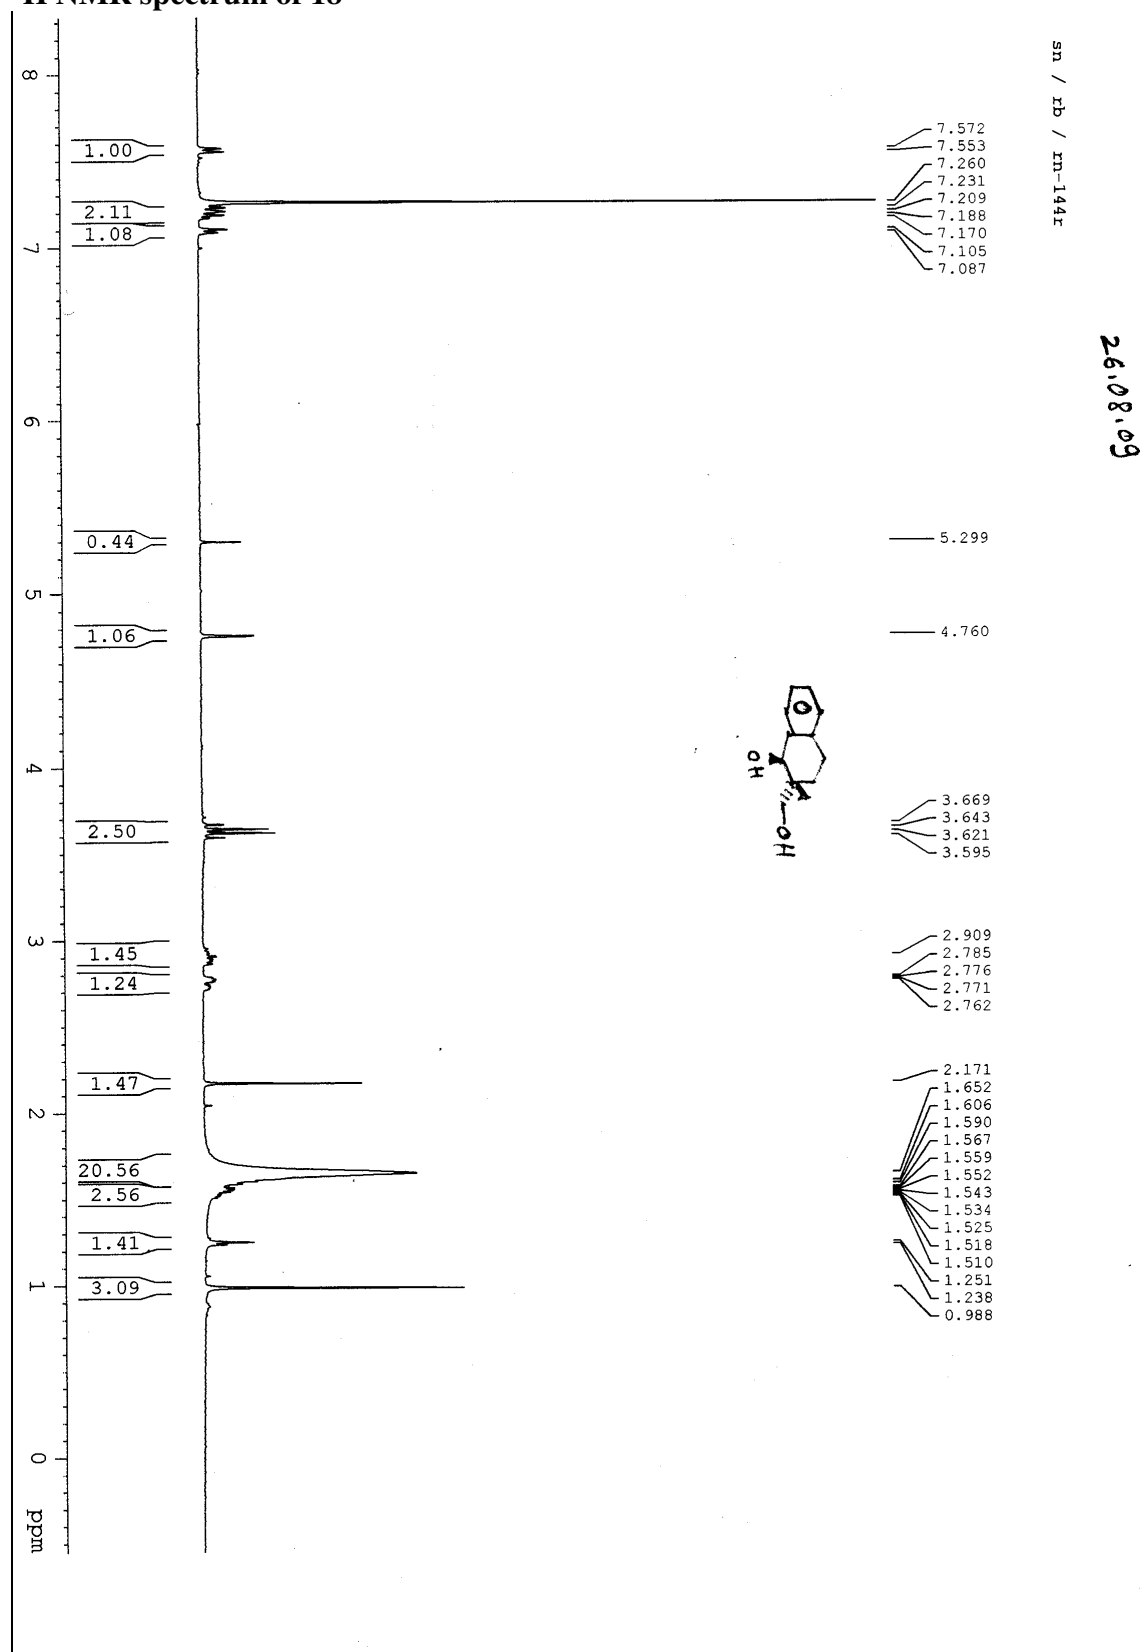

<sup>13</sup>C NMR spectrum of 18

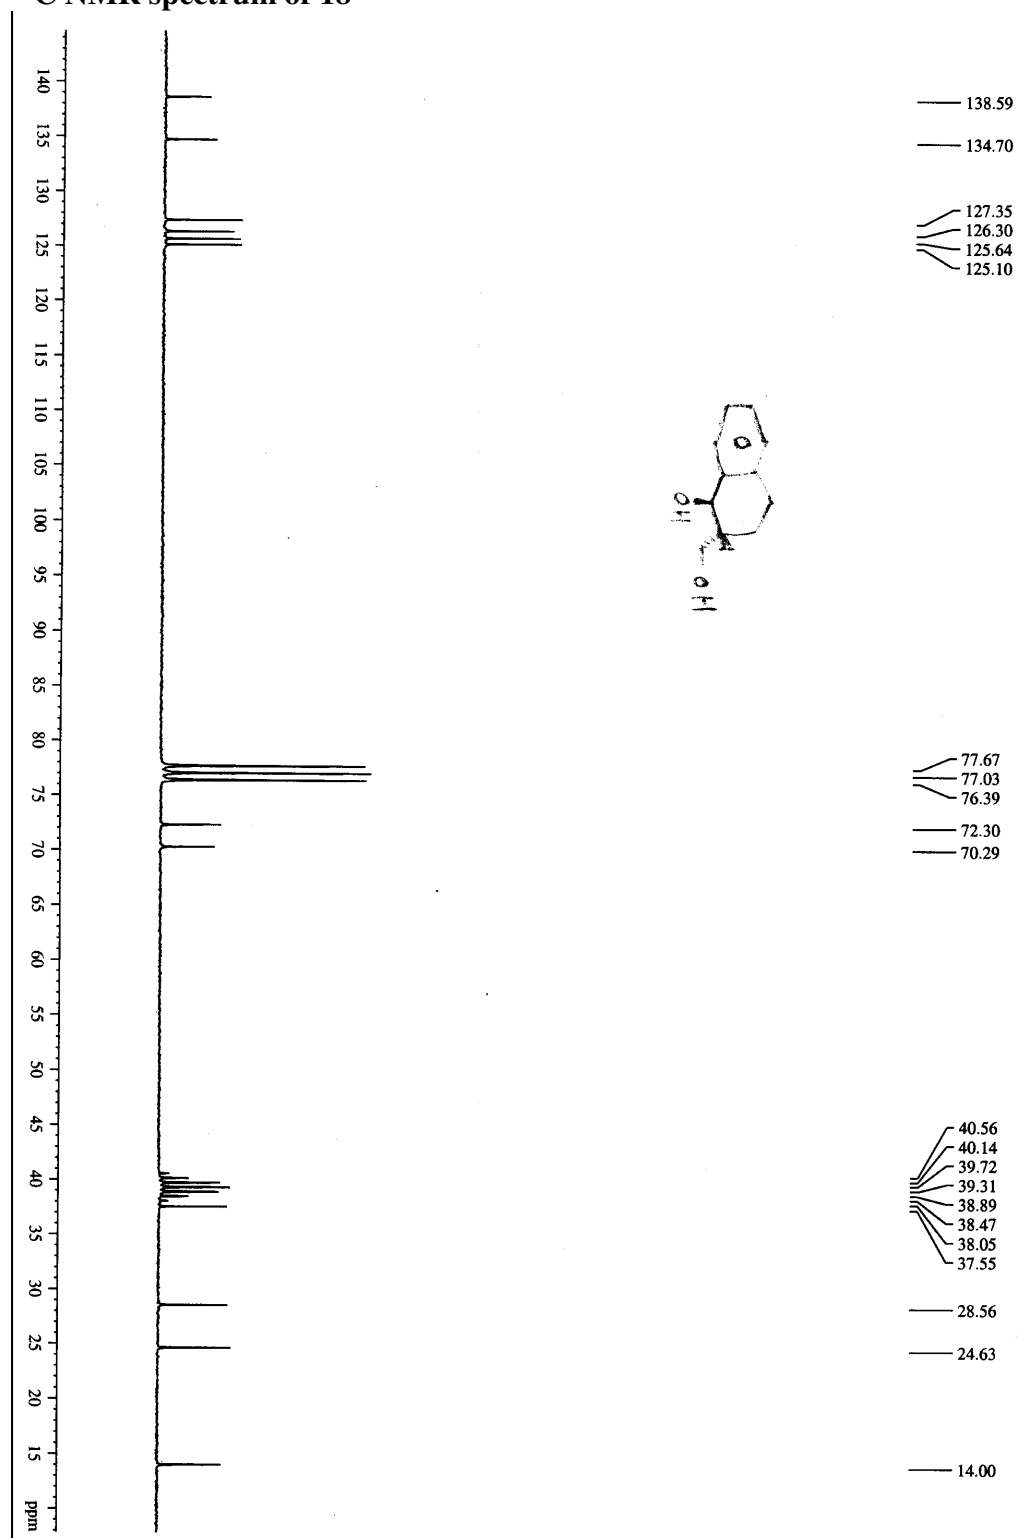

sn/rb/rn144C13

# <sup>1</sup>H NMR of compound 19

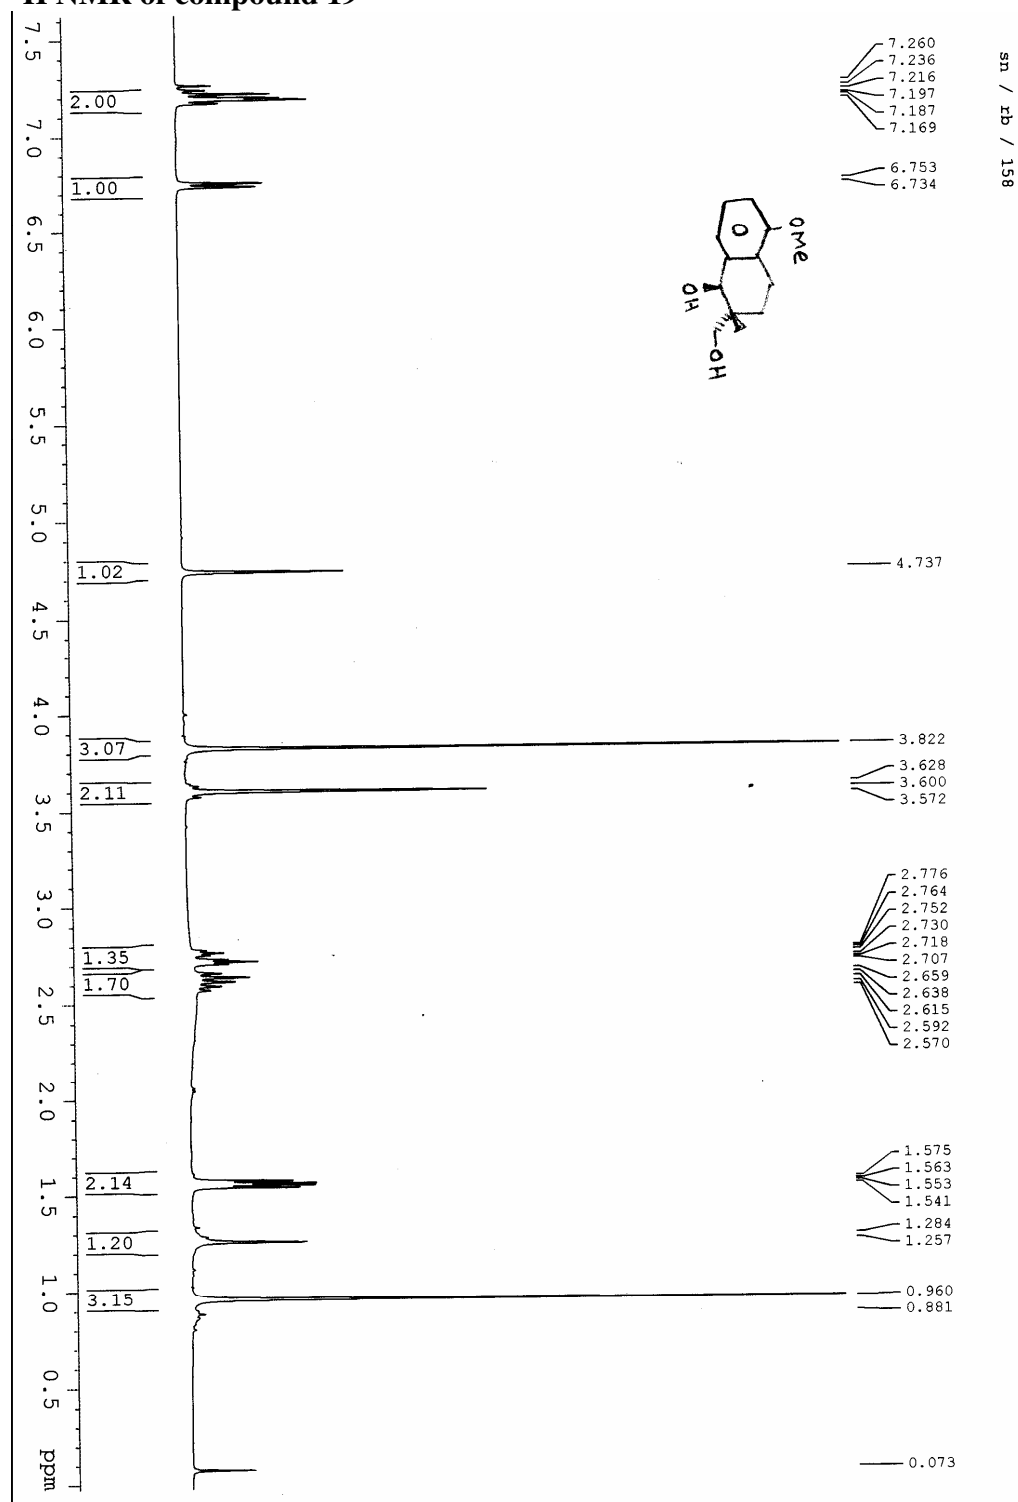

# <sup>13</sup>C NMR of compound 19

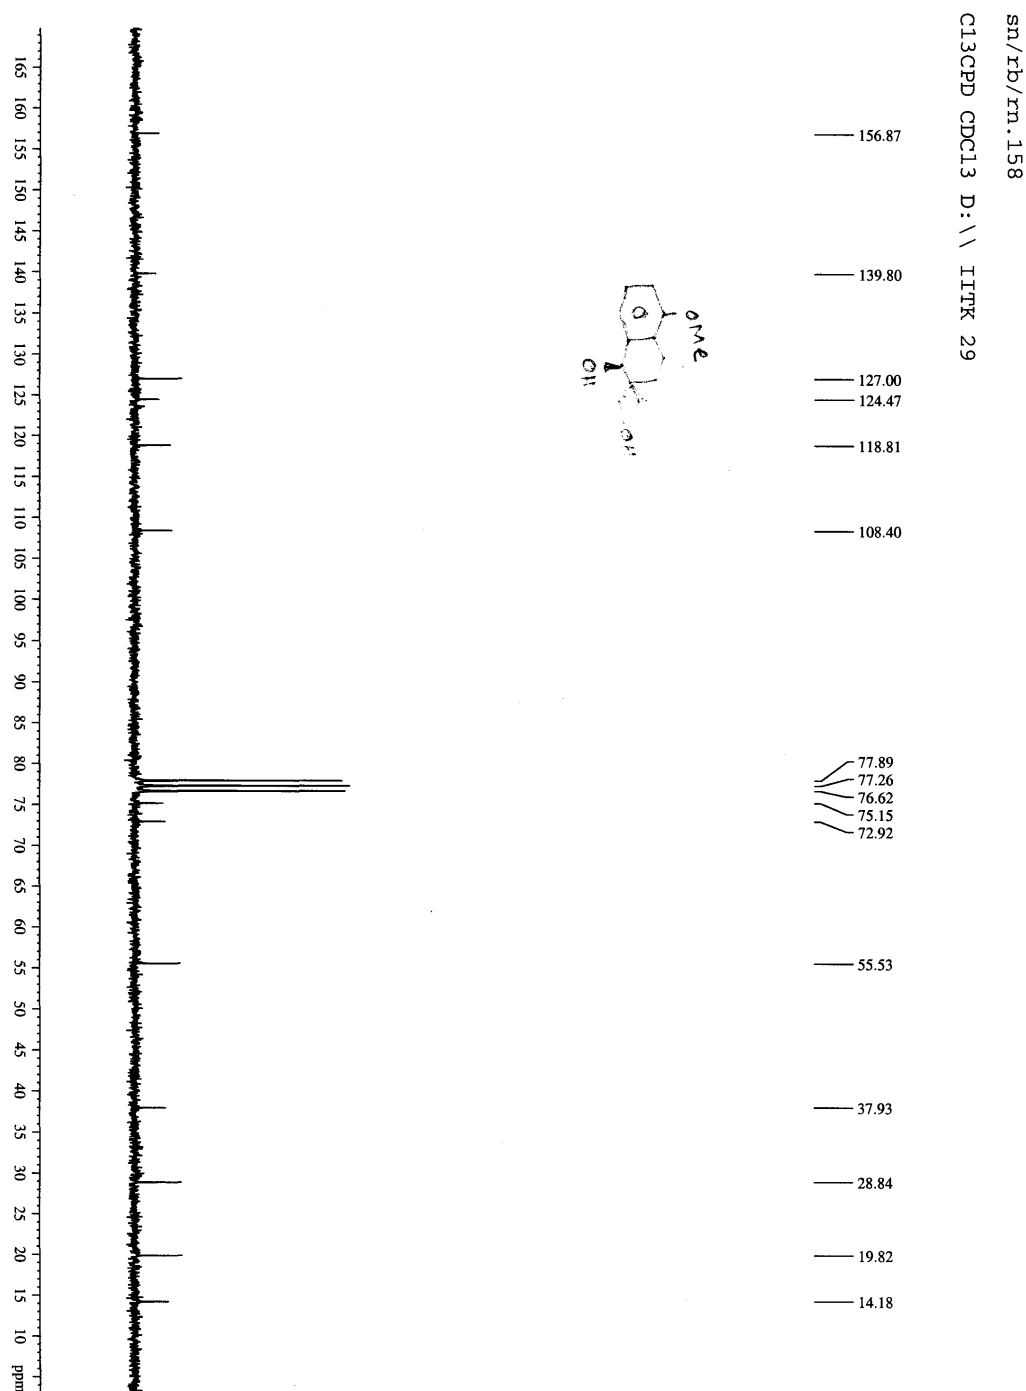



### $^{13}\text{C}$ NMR of compound 20

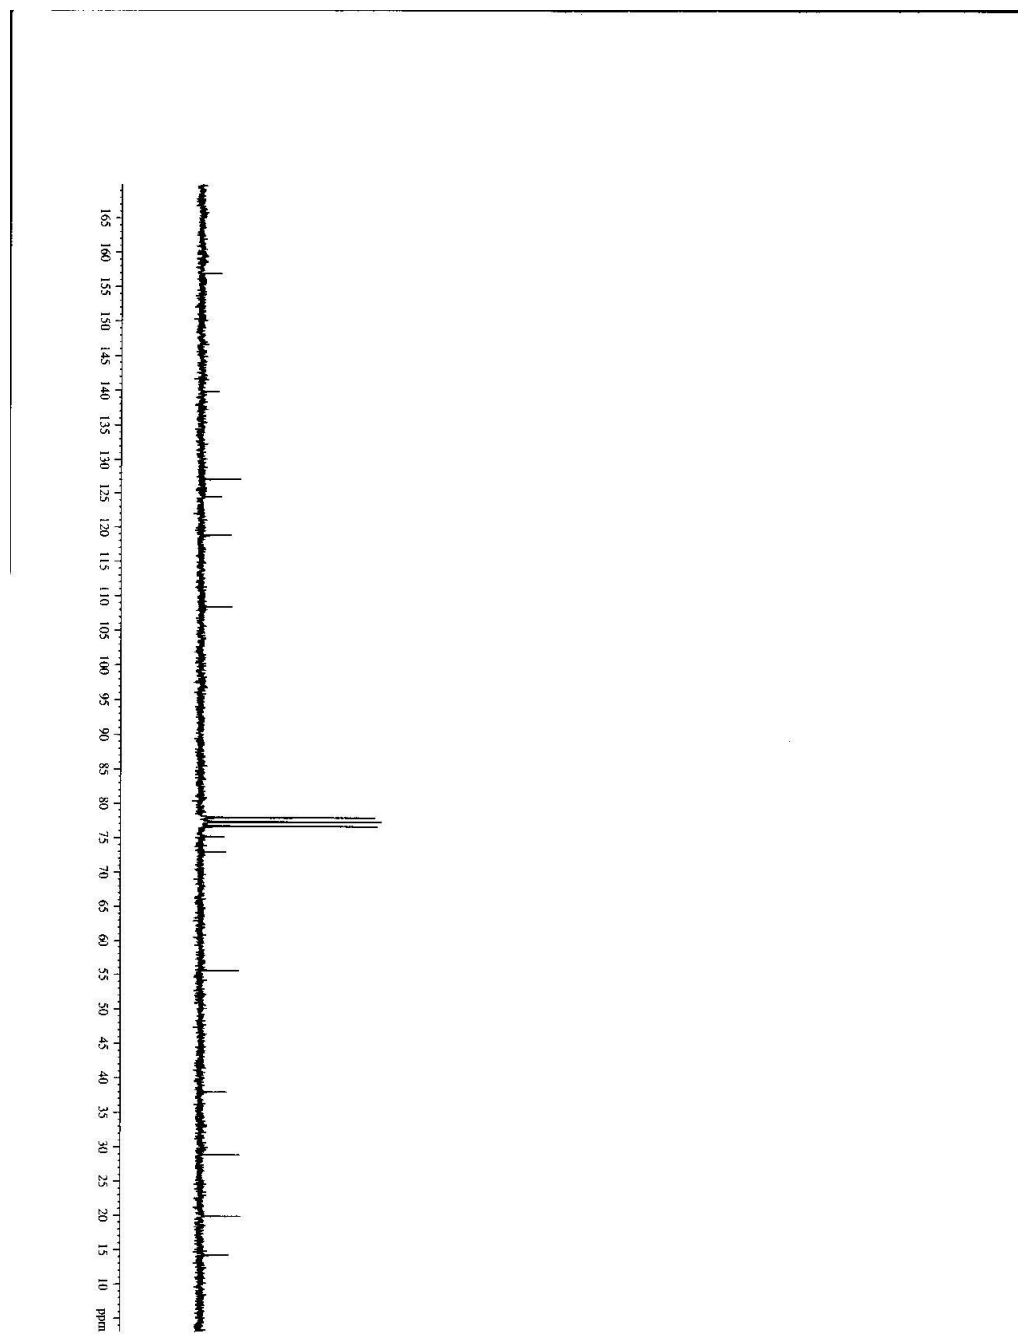

# <sup>1</sup>H NMR of compound 21

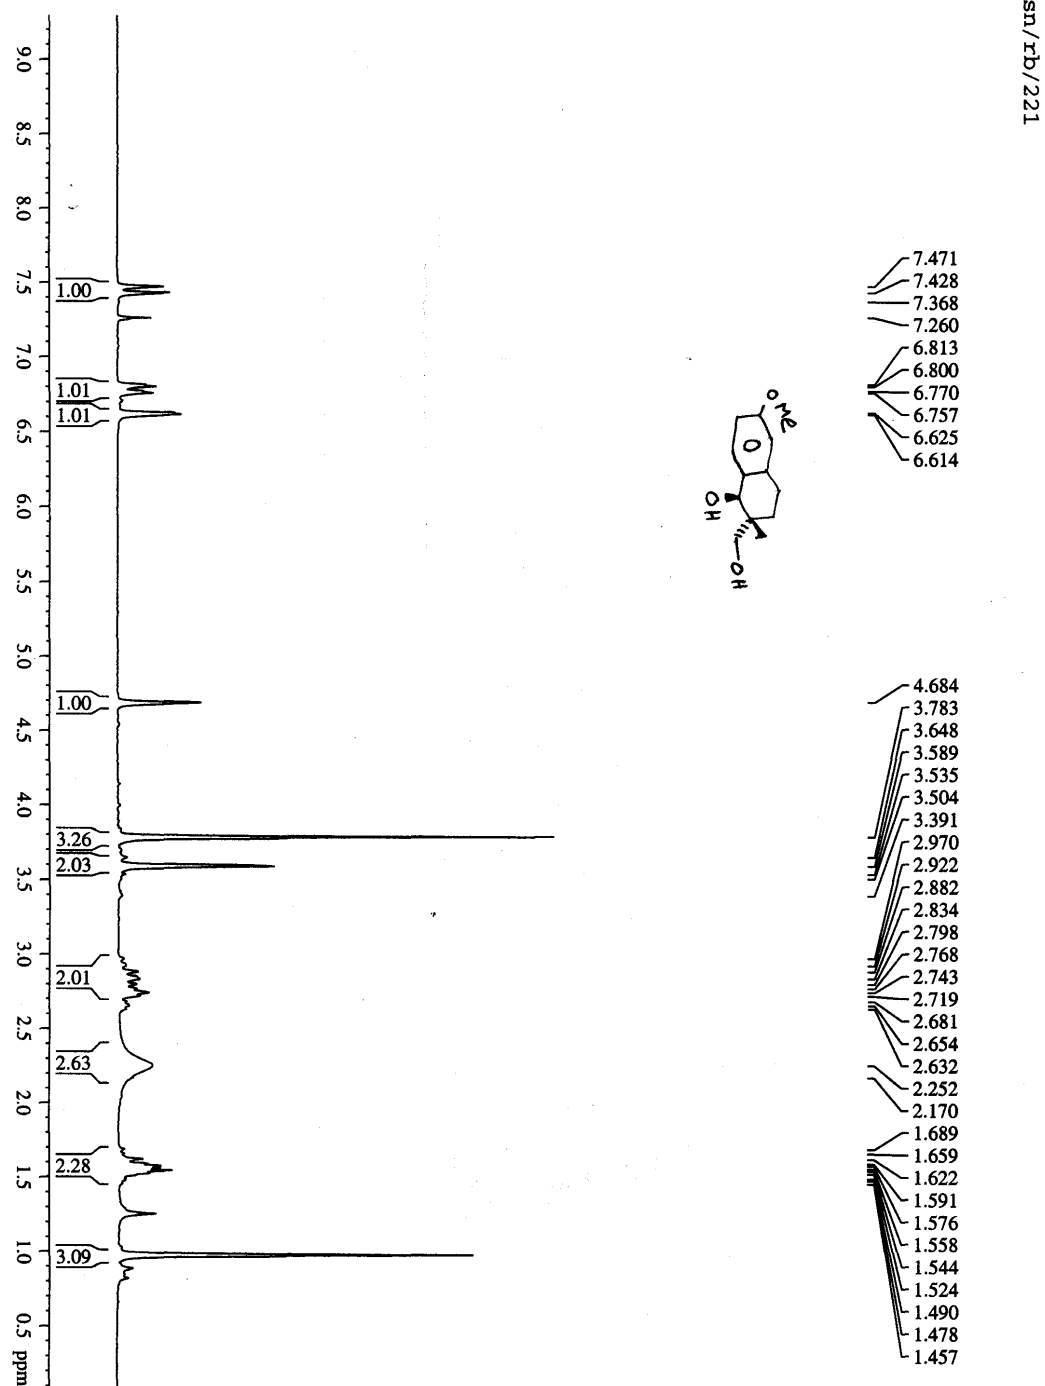



# <sup>1</sup>H NMR of compound ent-22

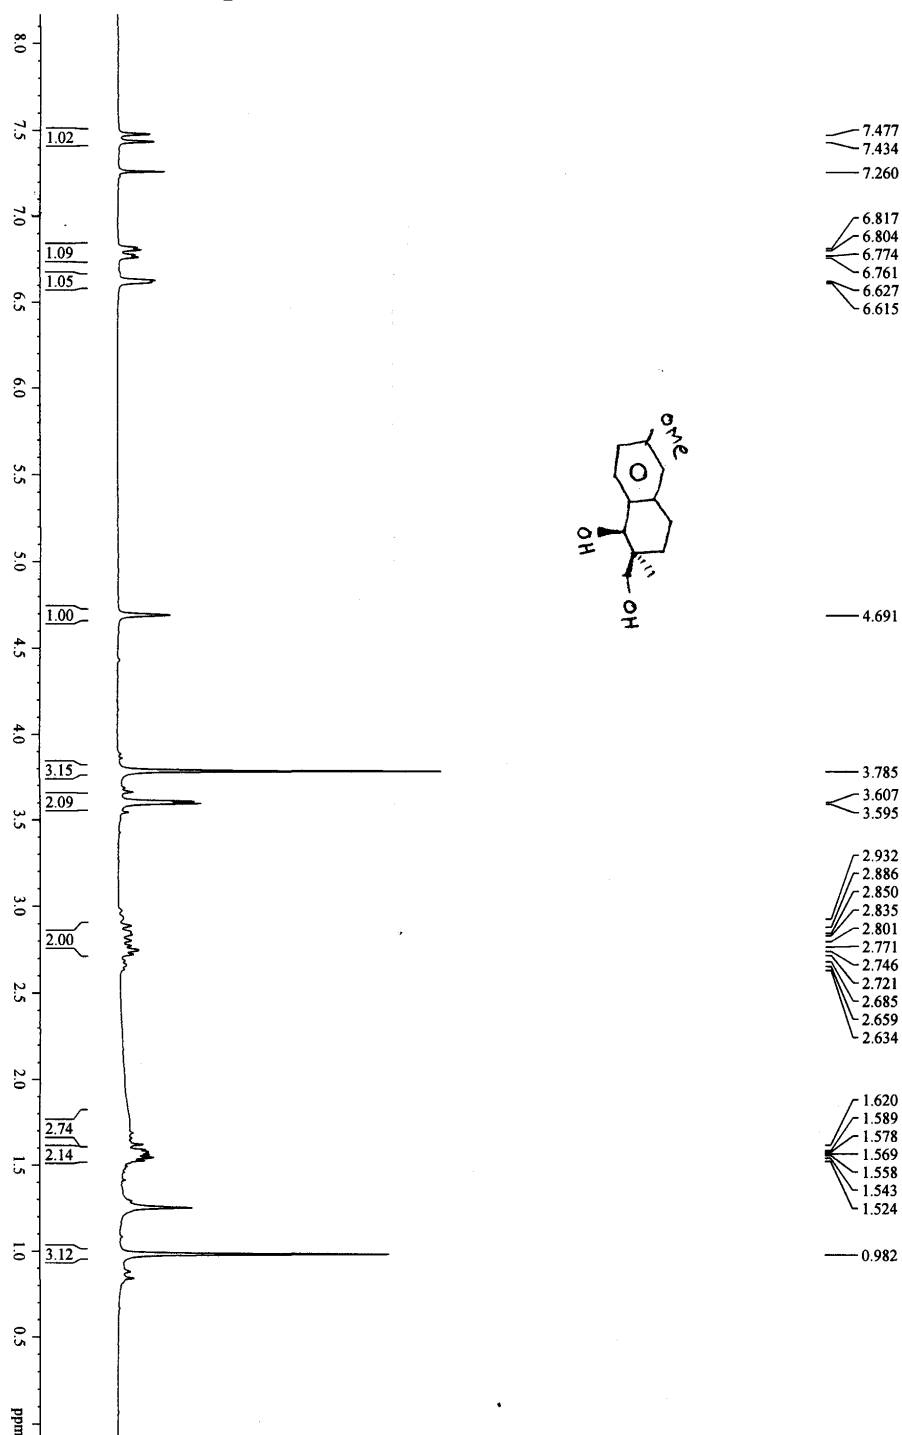

sn/rb/336  
PROTON CDCl<sub>3</sub> D:\ IITK 13

**<sup>13</sup>C NMR of compound ent-22**

snc/rb/336  
C13CPD CDC13 D:\ IITK 2

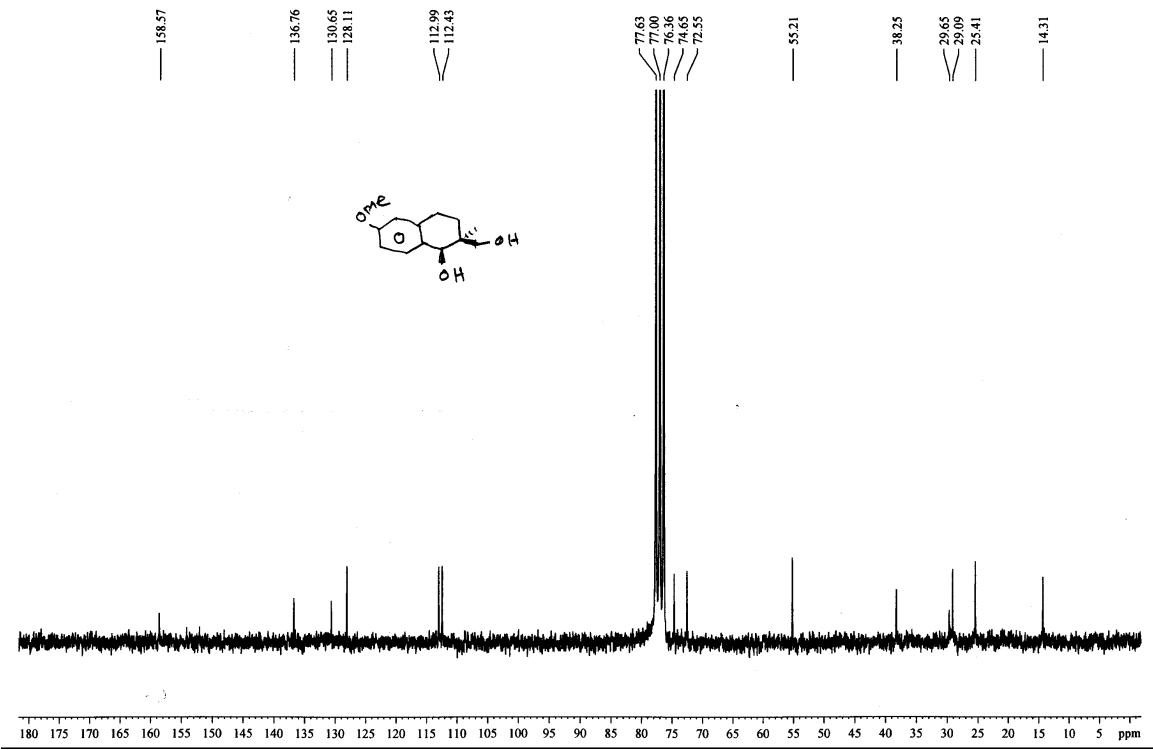

# <sup>1</sup>H NMR of compound 23

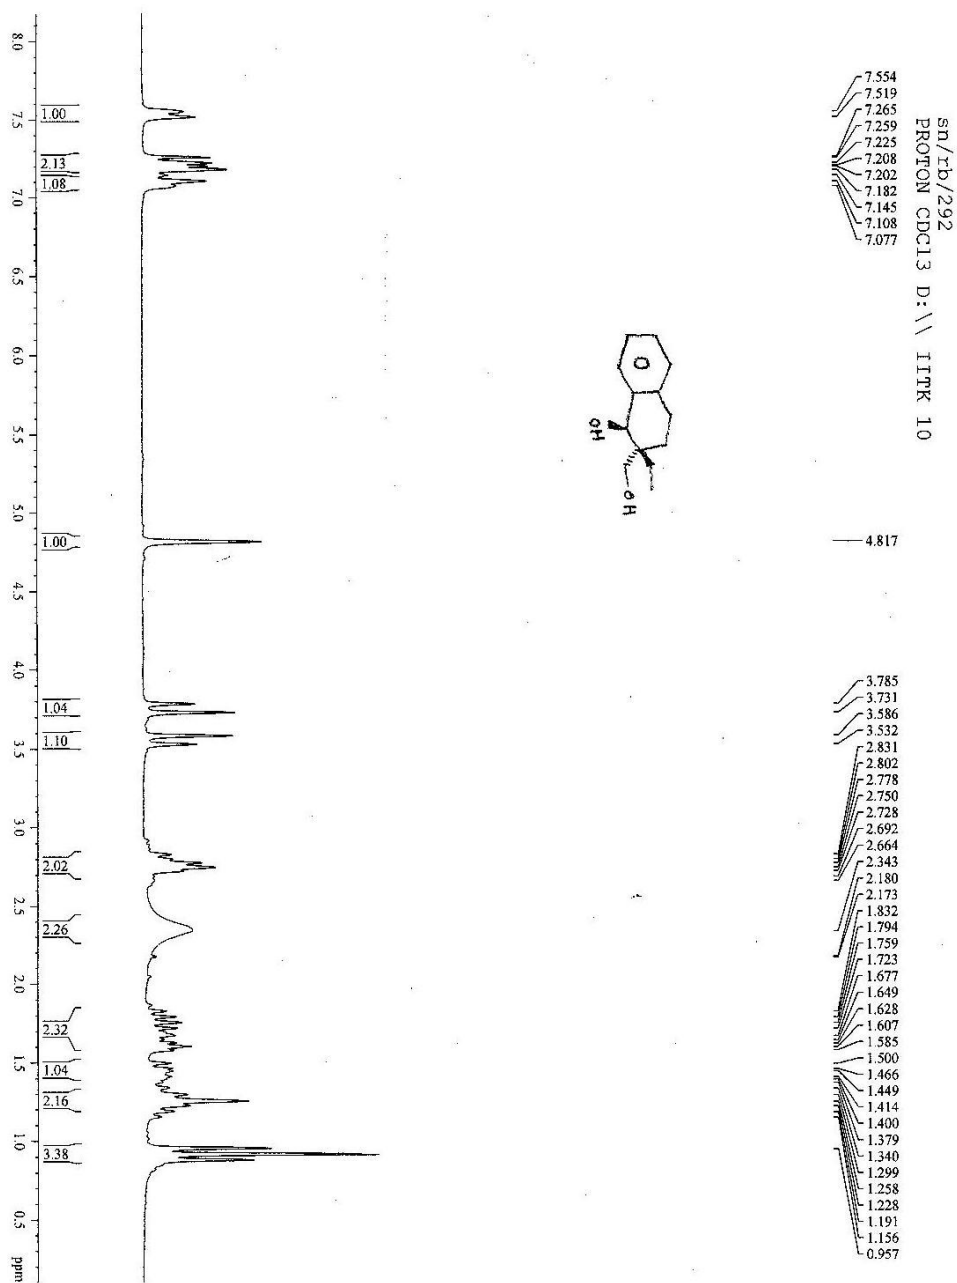

# <sup>13</sup>C NMR of compound 23

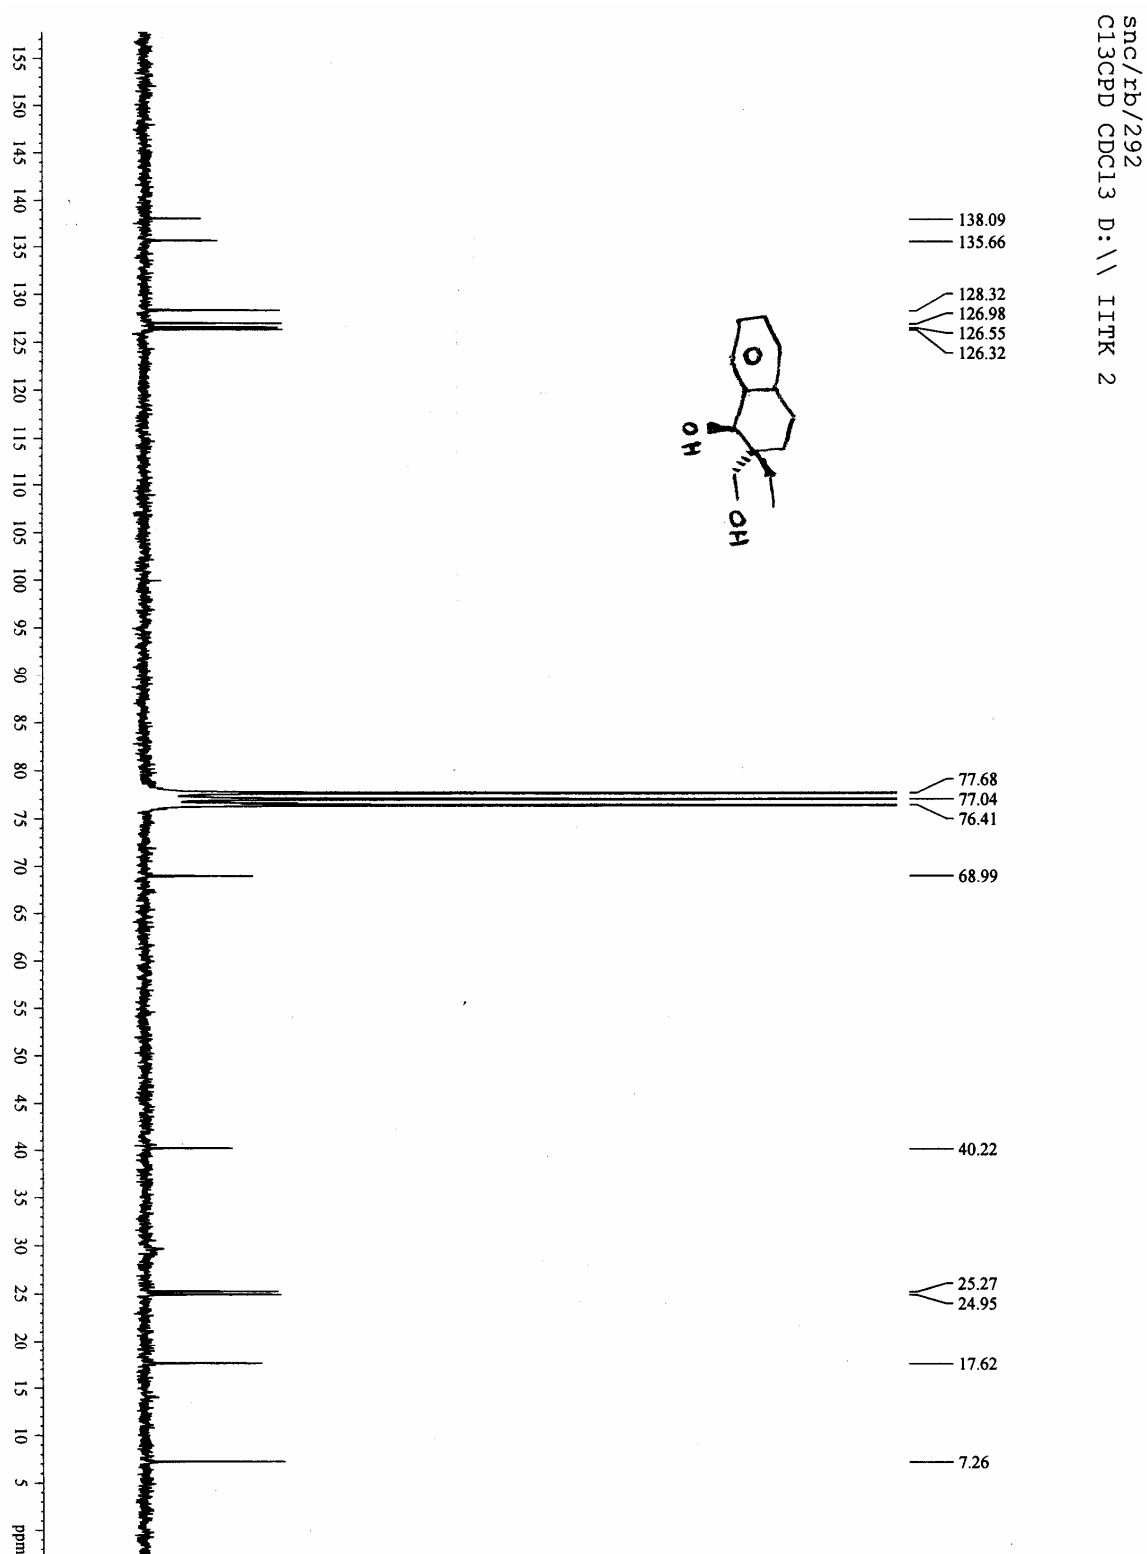

# <sup>1</sup>H NMR of compound ent-24

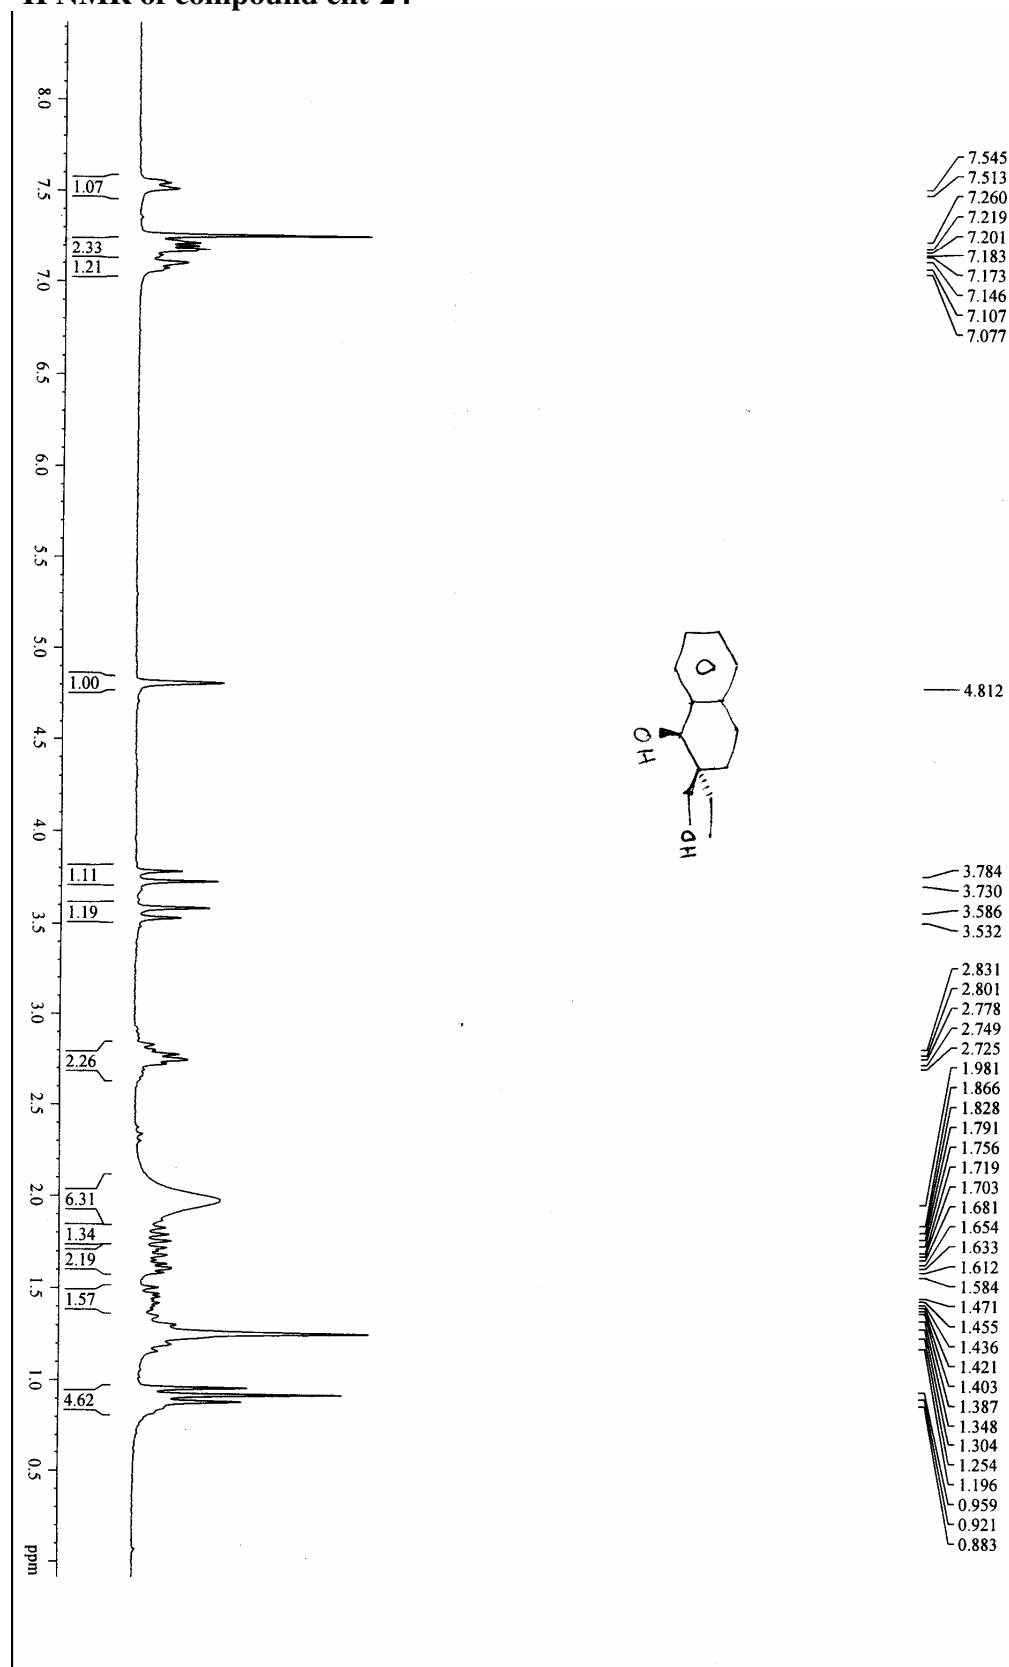

sn/rb/363

# <sup>13</sup>C NMR of compound ent-24

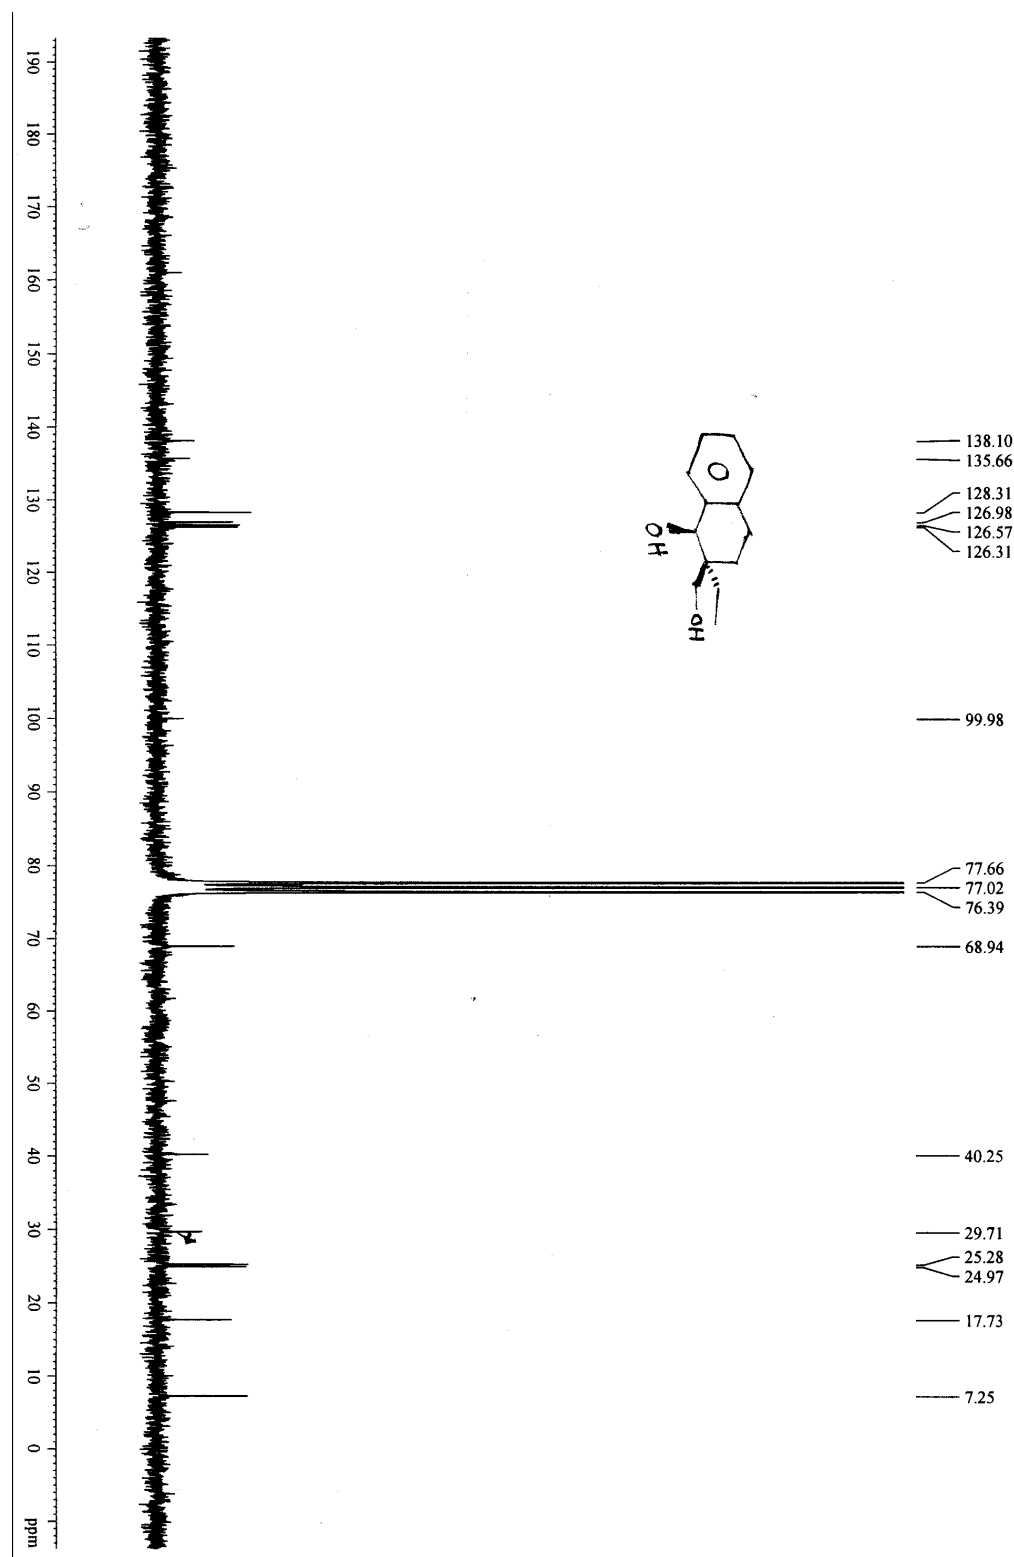

snc/rb/363

# <sup>1</sup>H NMR of compound 25

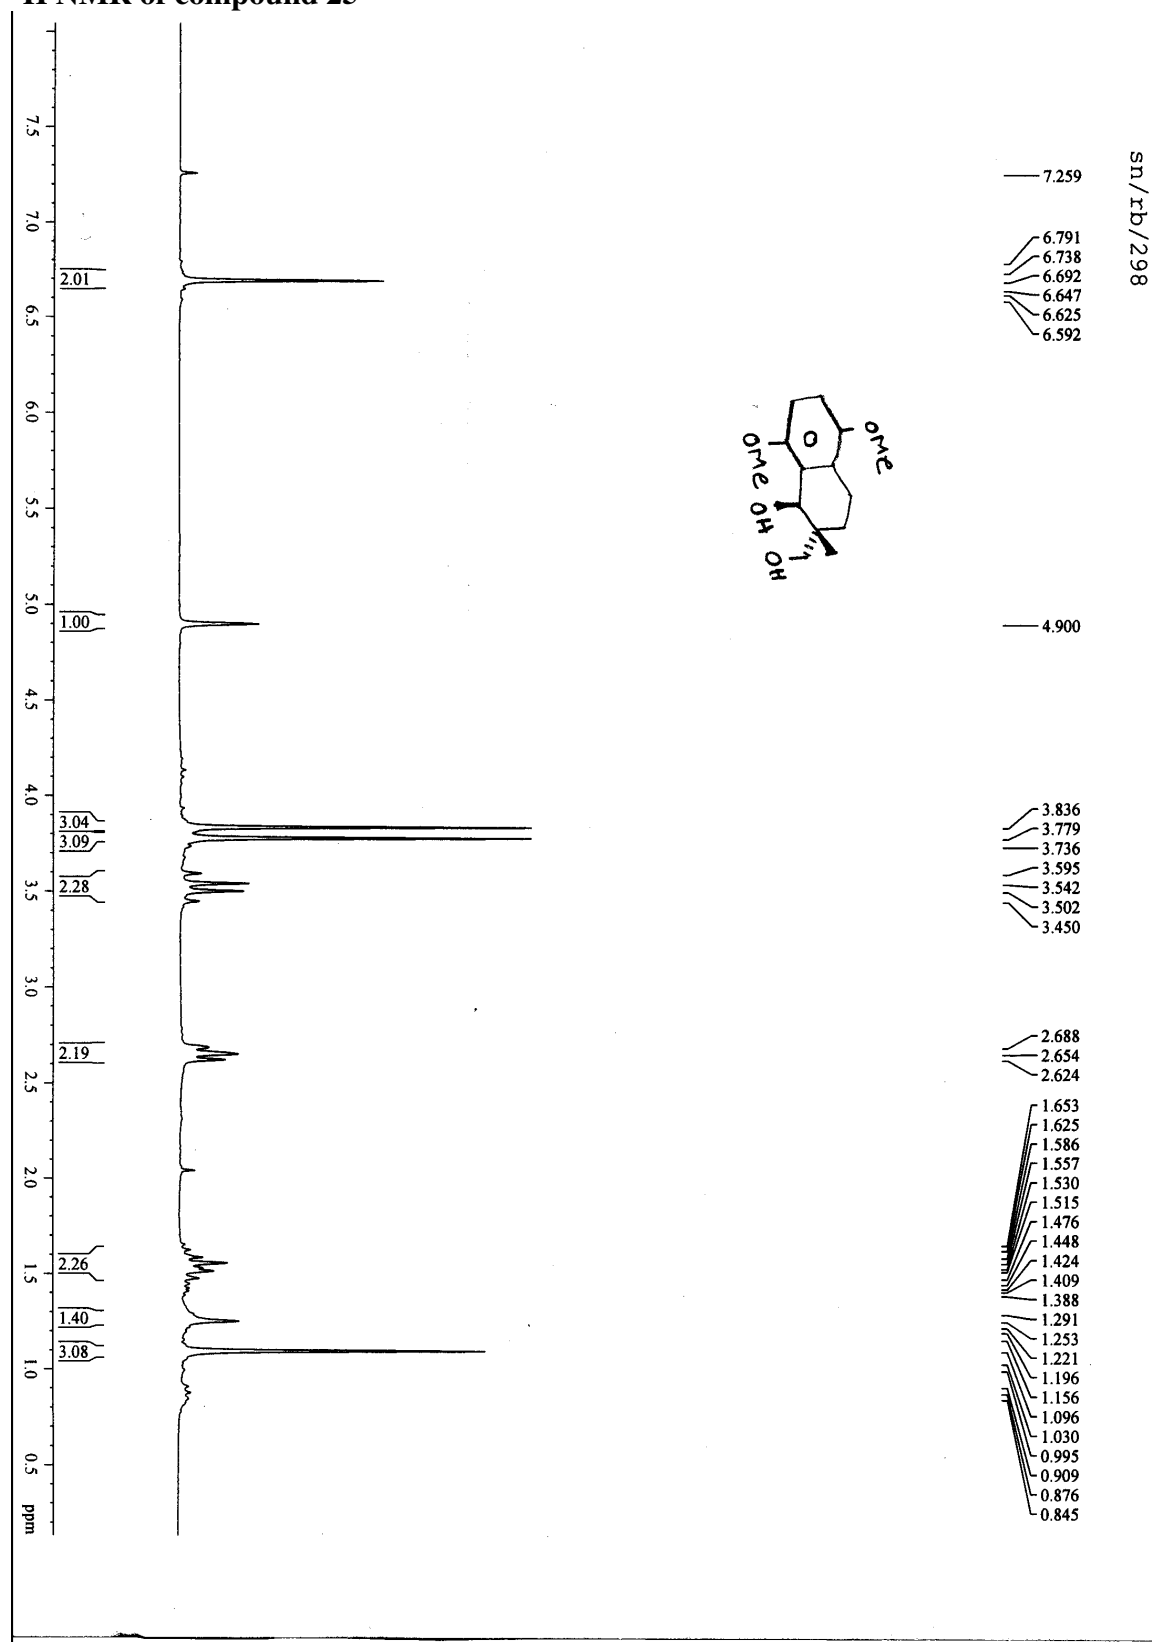

# <sup>13</sup>C NMR of compound 25

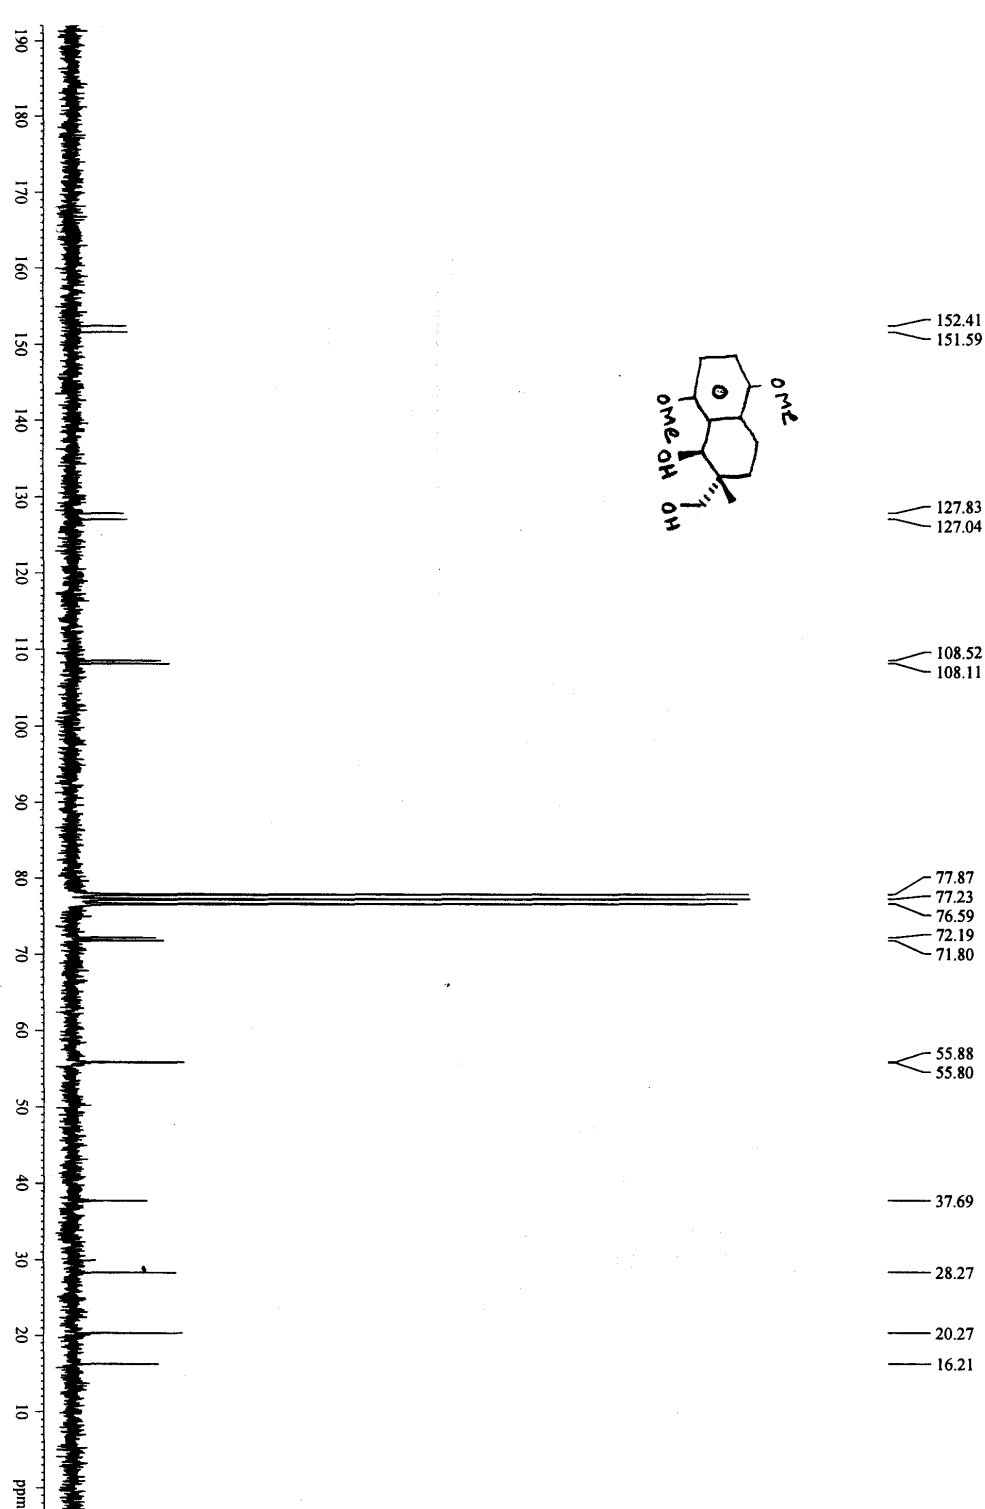

snc/rb/298  
C13CPD CDCl<sub>3</sub> D:\ IITK 2



# <sup>1</sup>H NMR of compound ent-26

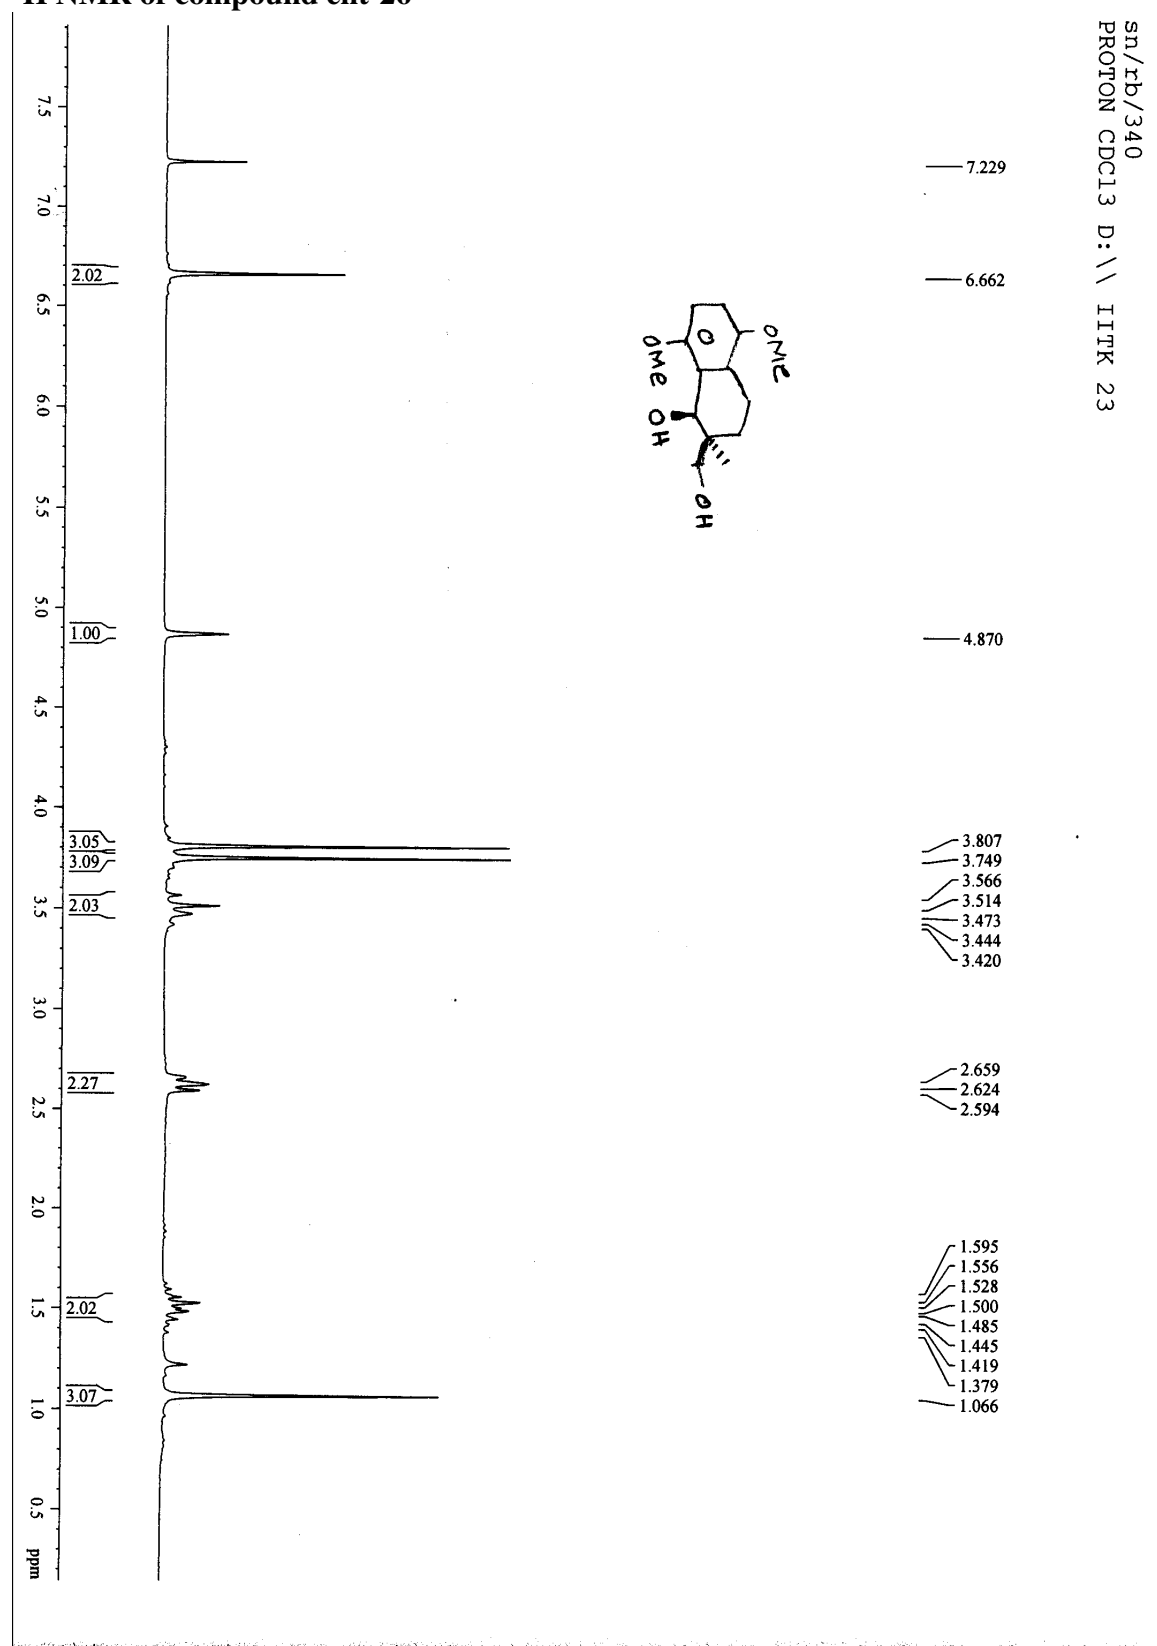

# <sup>13</sup>C NMR of compound ent-26

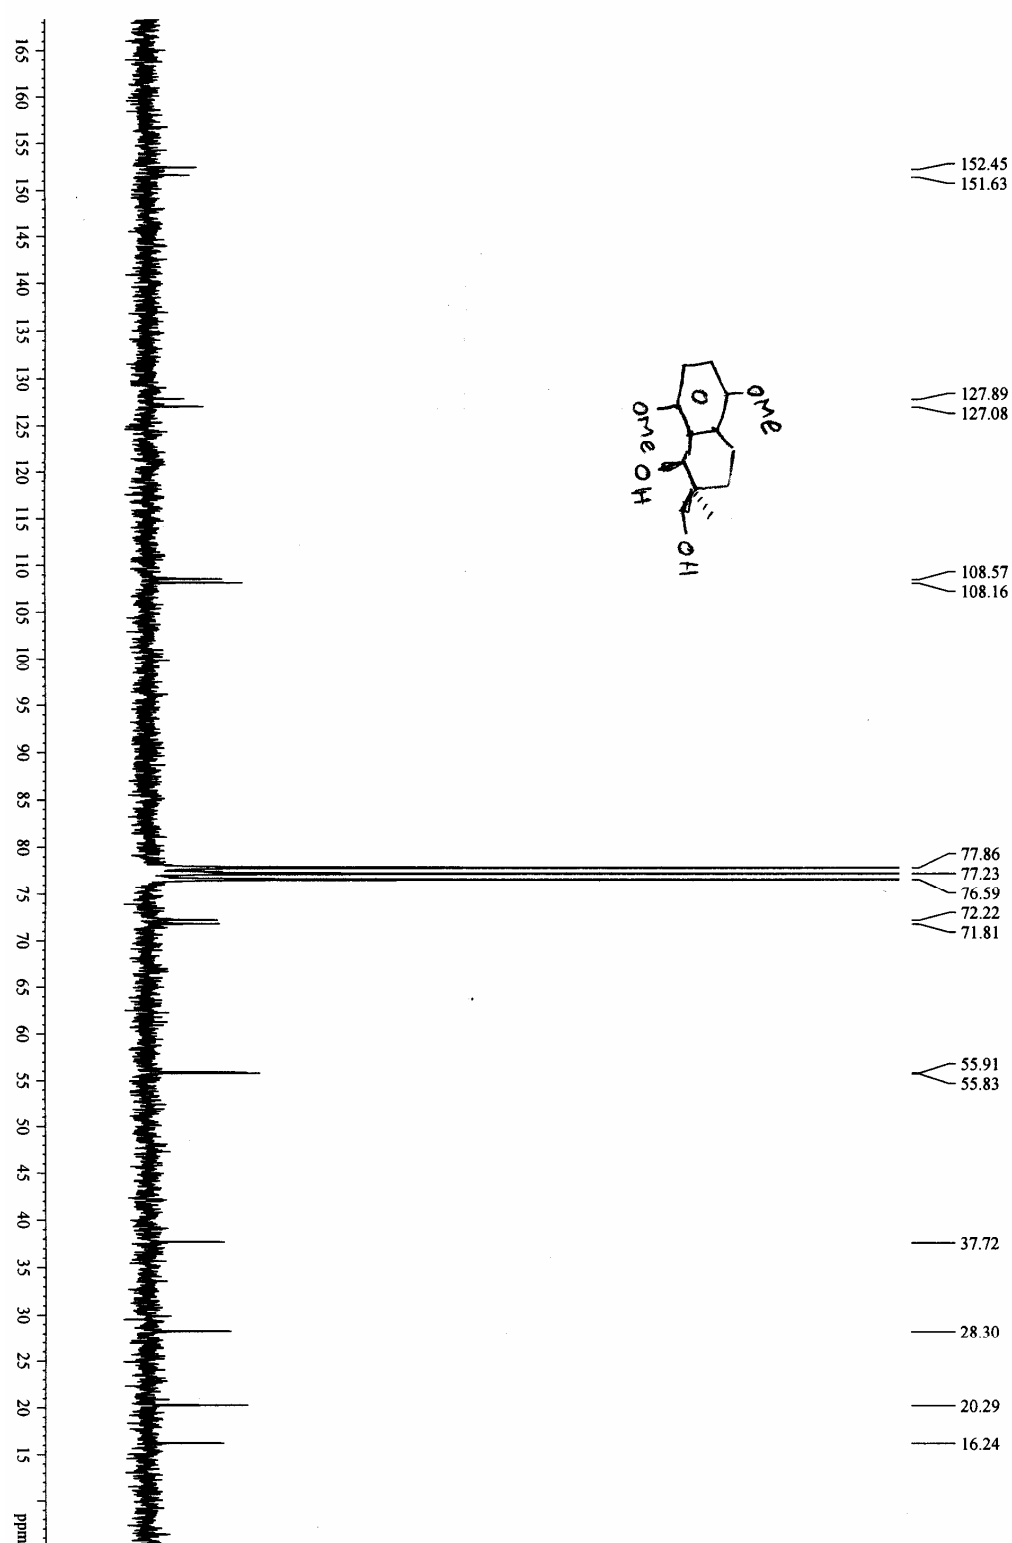

snc/rb/340  
C13CPD CDC13 D:\ IITK 2

# <sup>1</sup>H NMR of compound 27

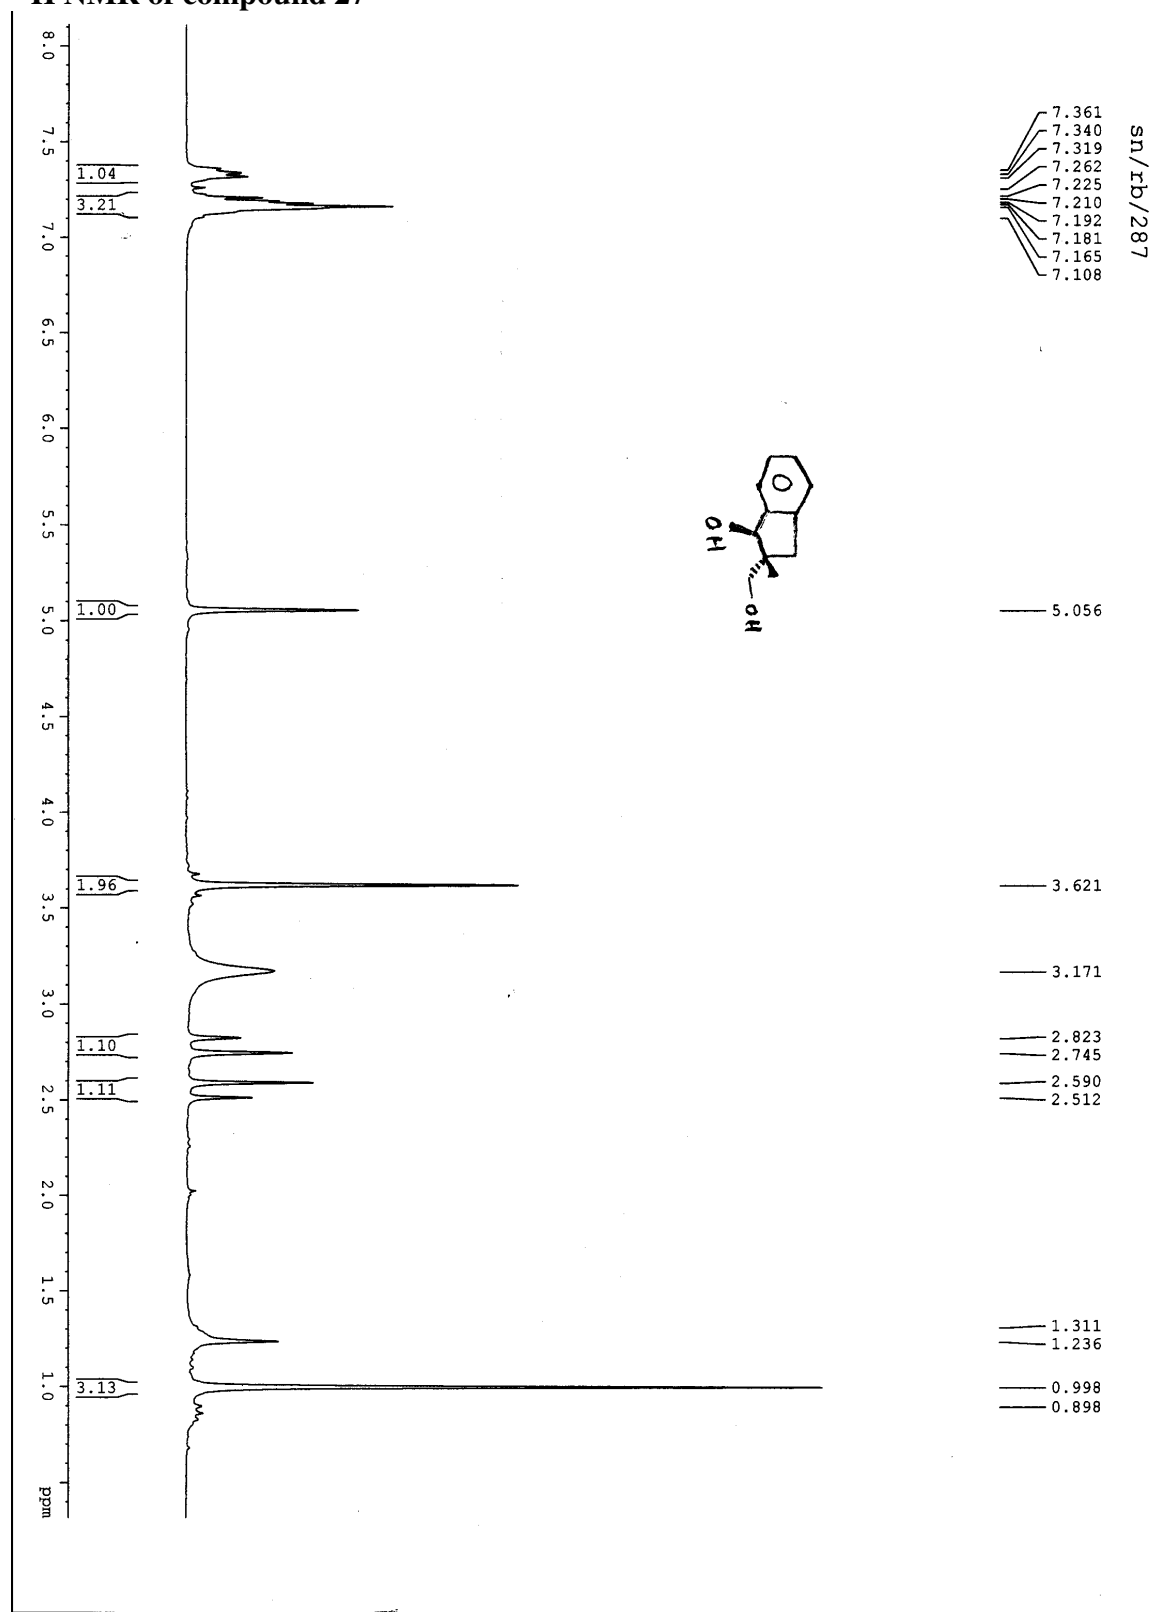

# <sup>13</sup>C NMR of compound 27

snc/rb/287  
C13CPD CDC13 D:\ IITK 2

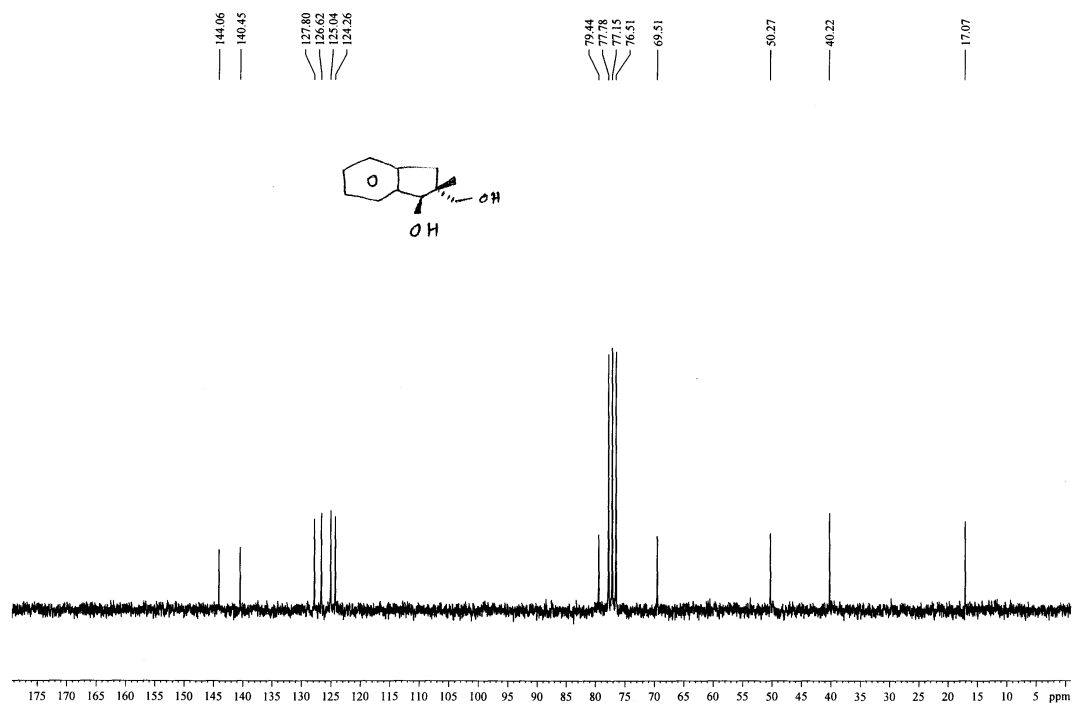

# <sup>1</sup>H NMR of compound ent-28

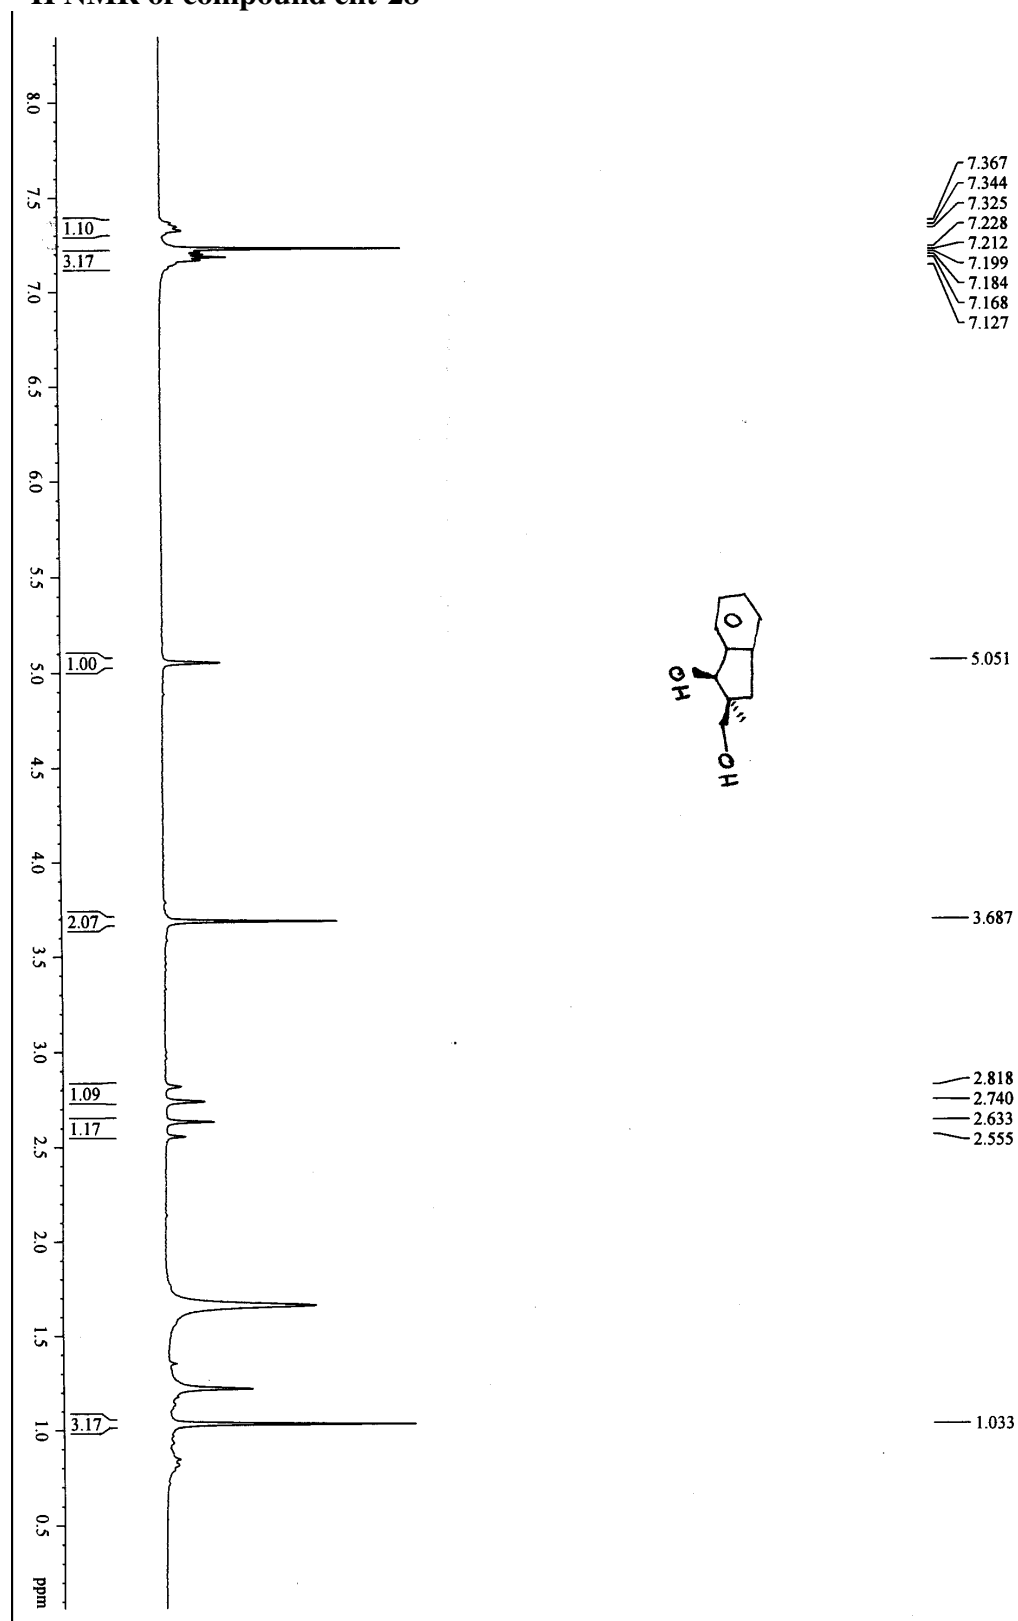

sn/rb/339

# <sup>13</sup>C NMR of compound ent-28

sn /rb/339

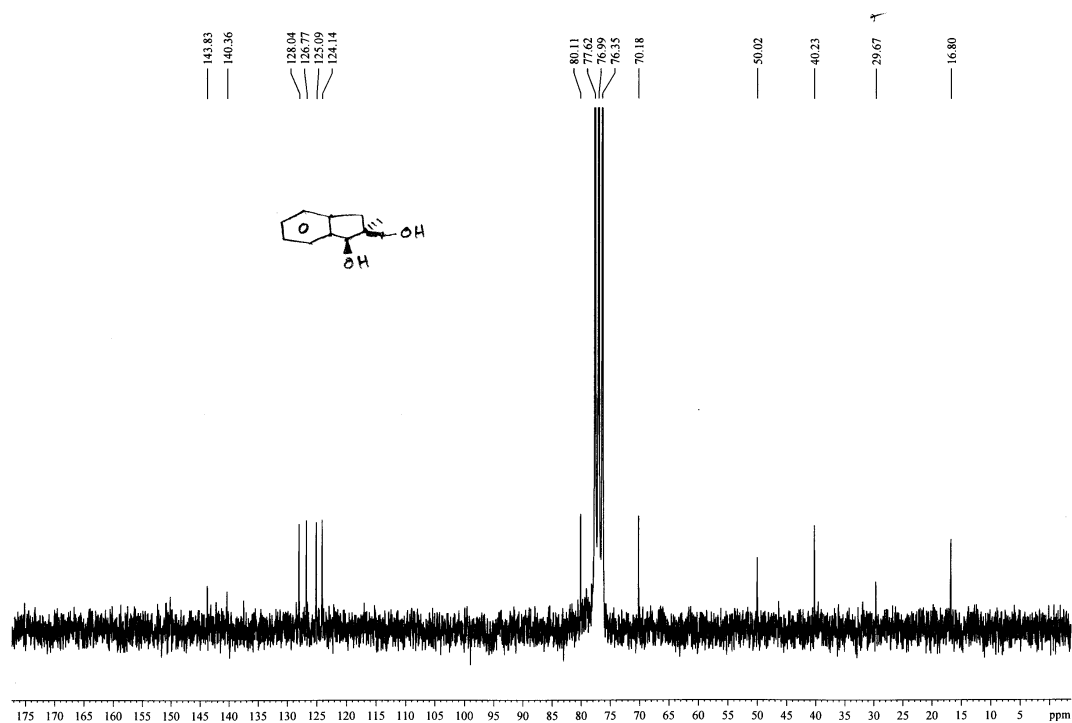

# <sup>1</sup>H NMR of compound 29

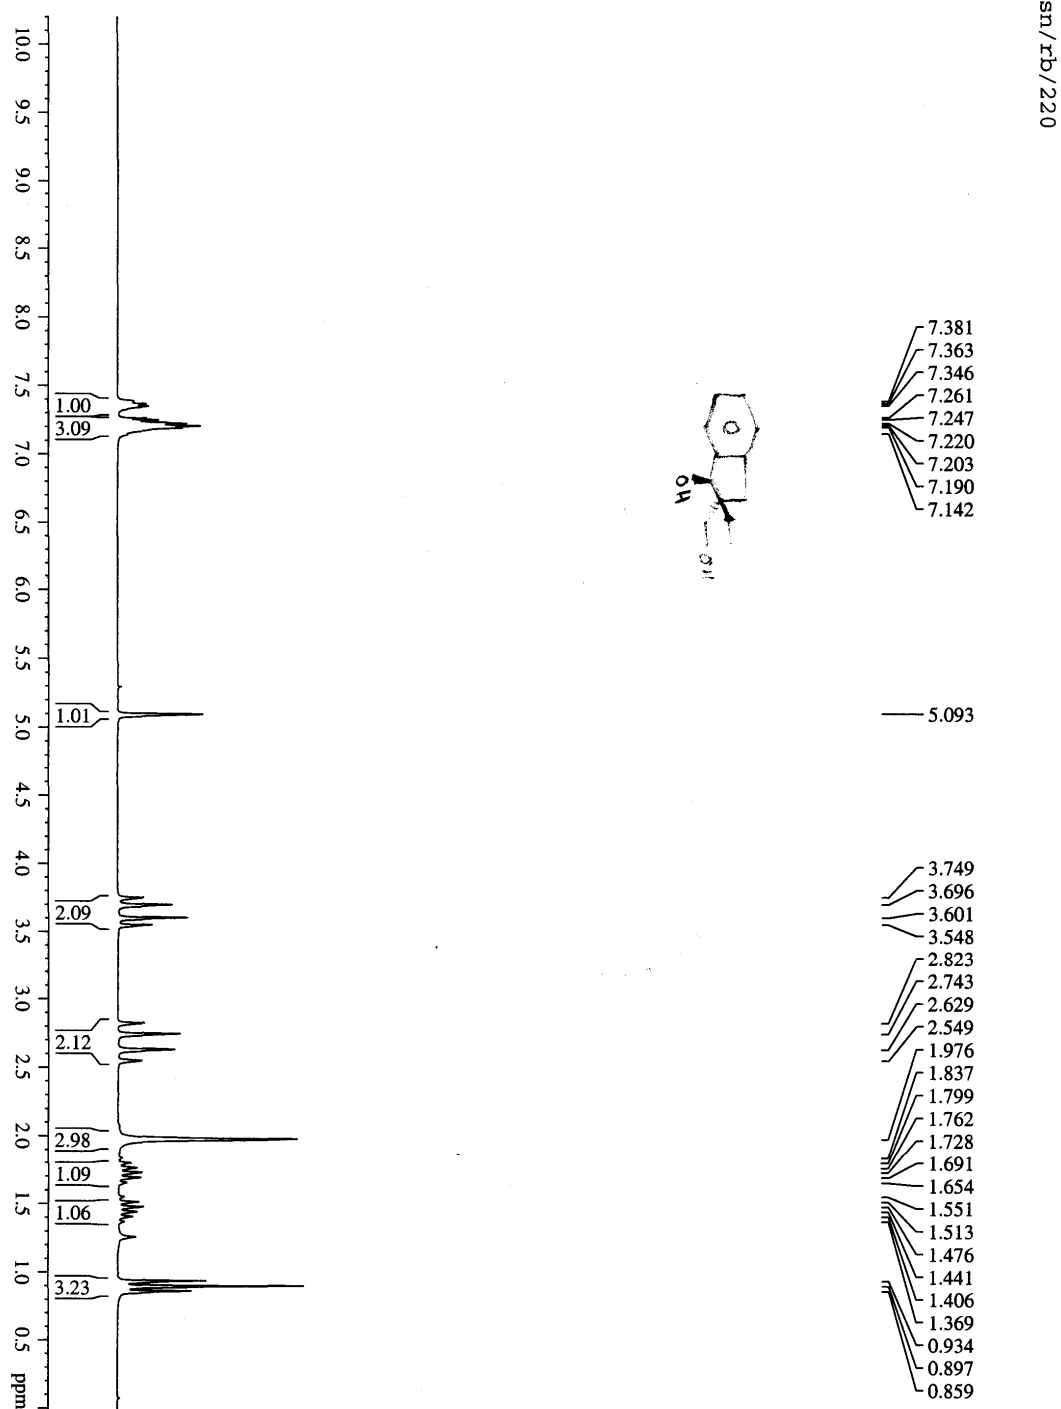

# <sup>13</sup>C NMR of compound 29

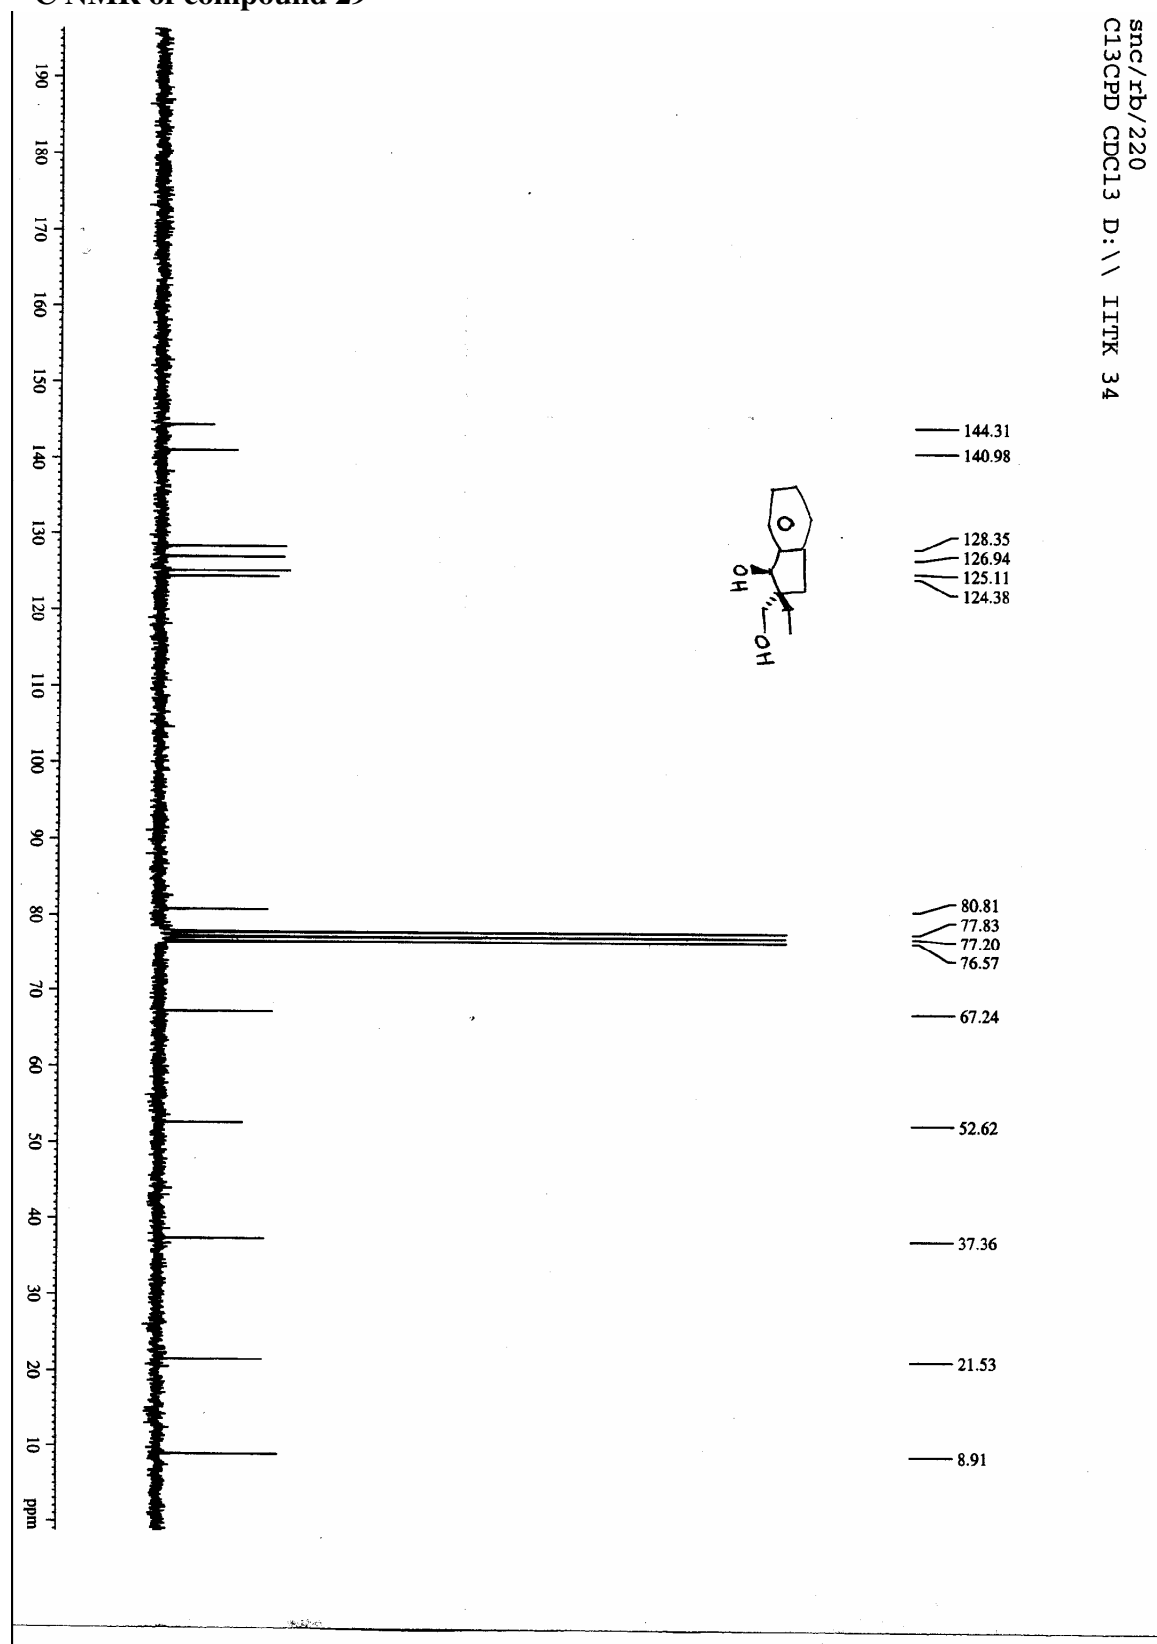



# <sup>1</sup>H NMR of compound ent-30

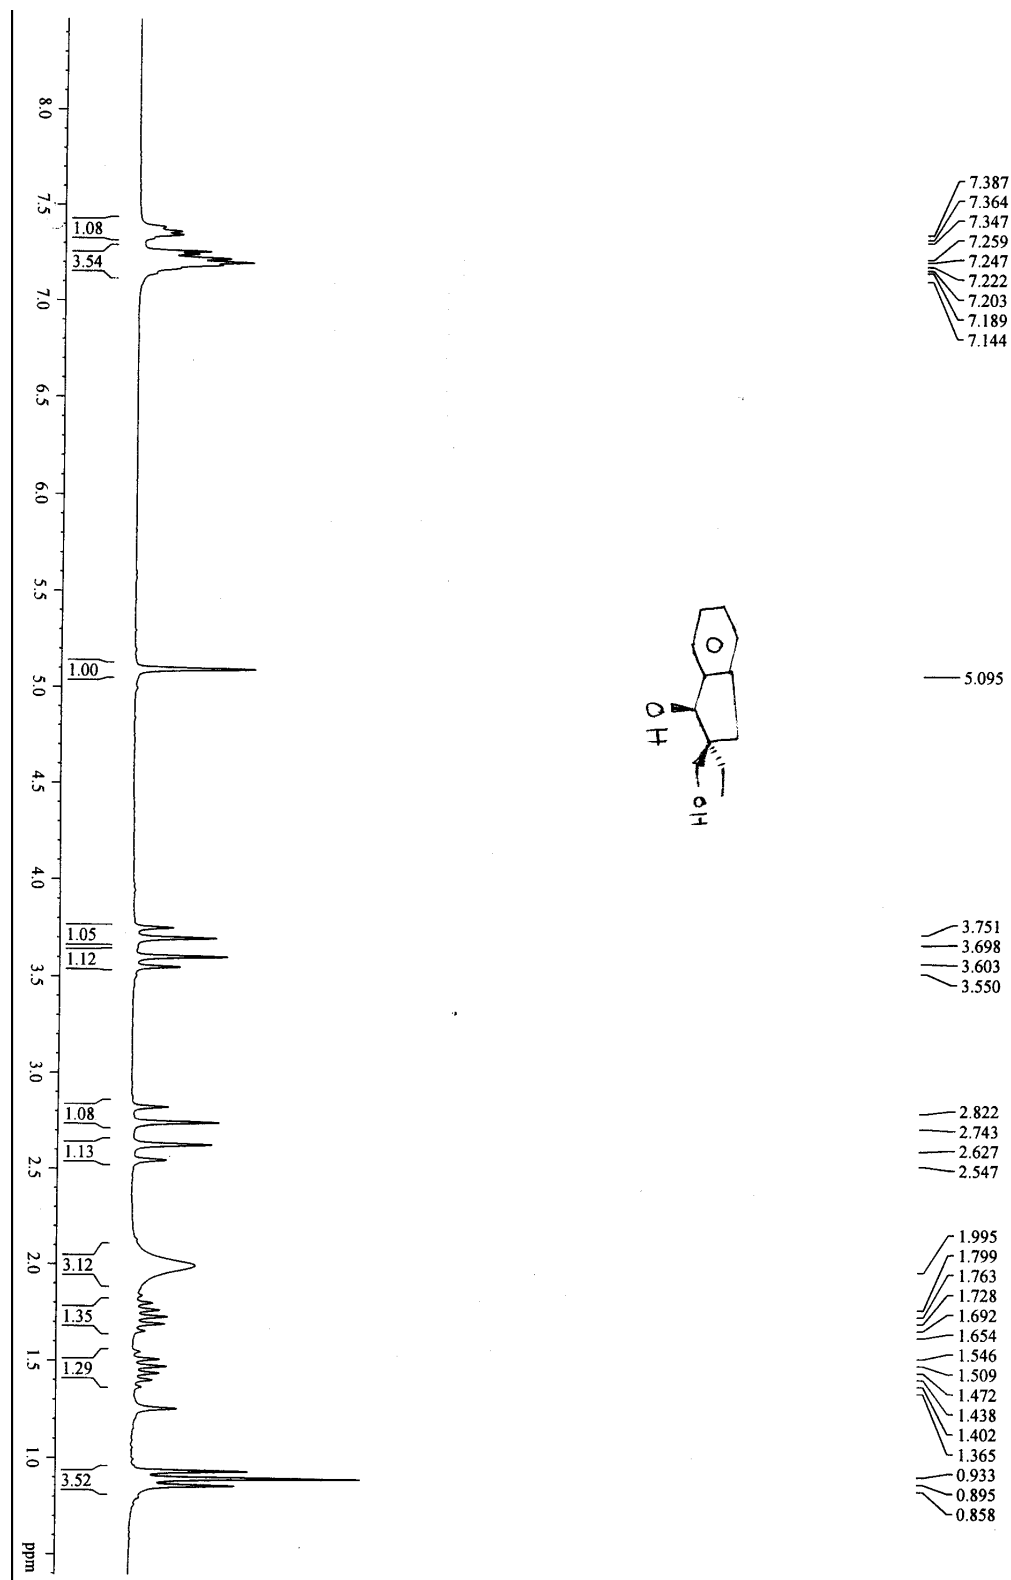

sn/rb/362

# <sup>13</sup>C NMR of compound ent-30

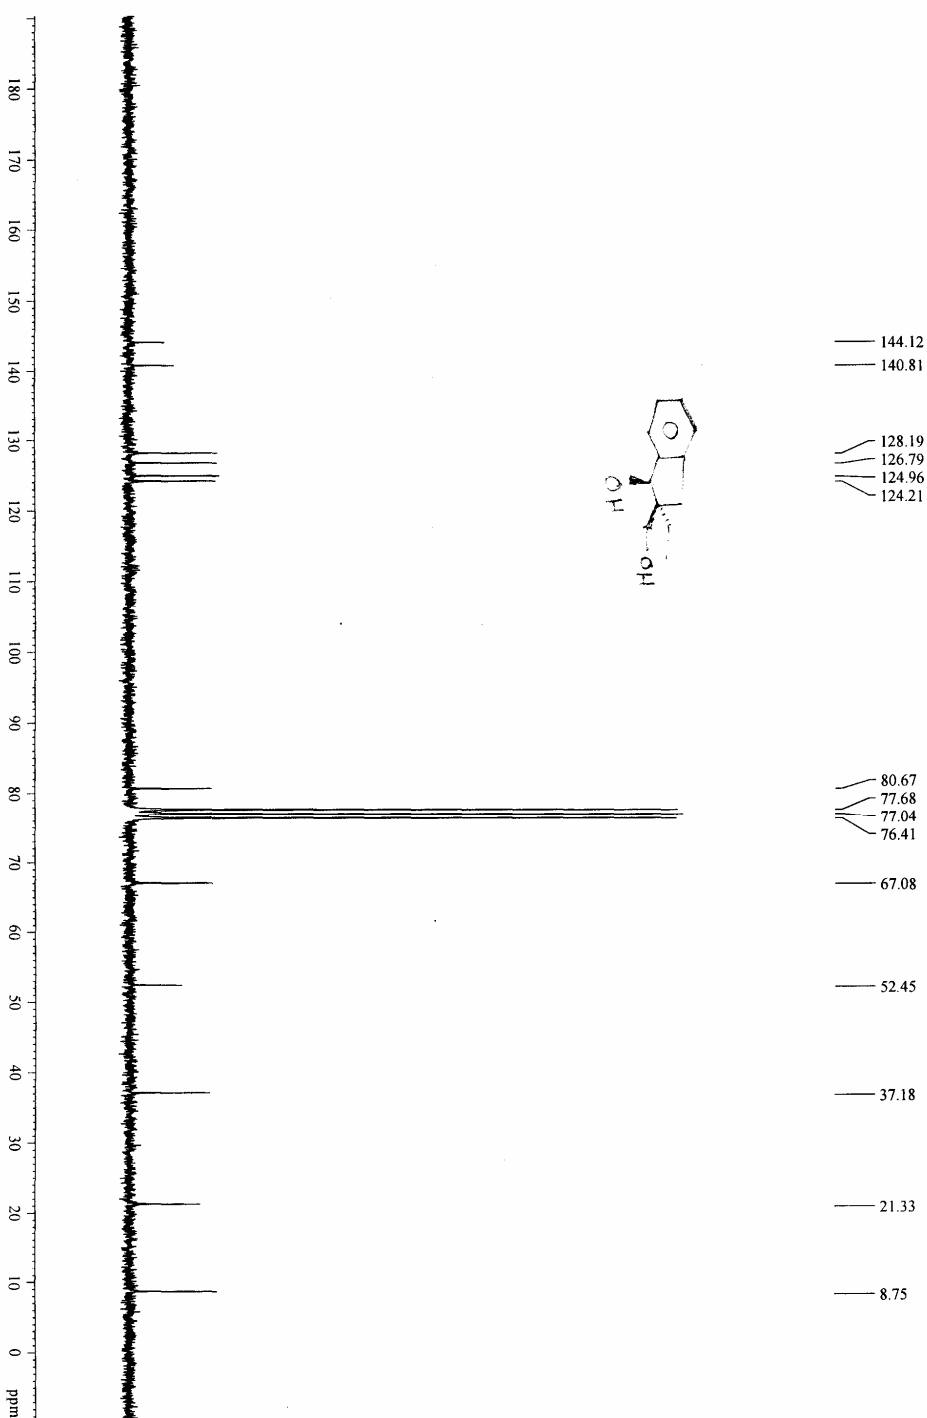

snc/rb/362

# <sup>1</sup>H NMR of compound 31

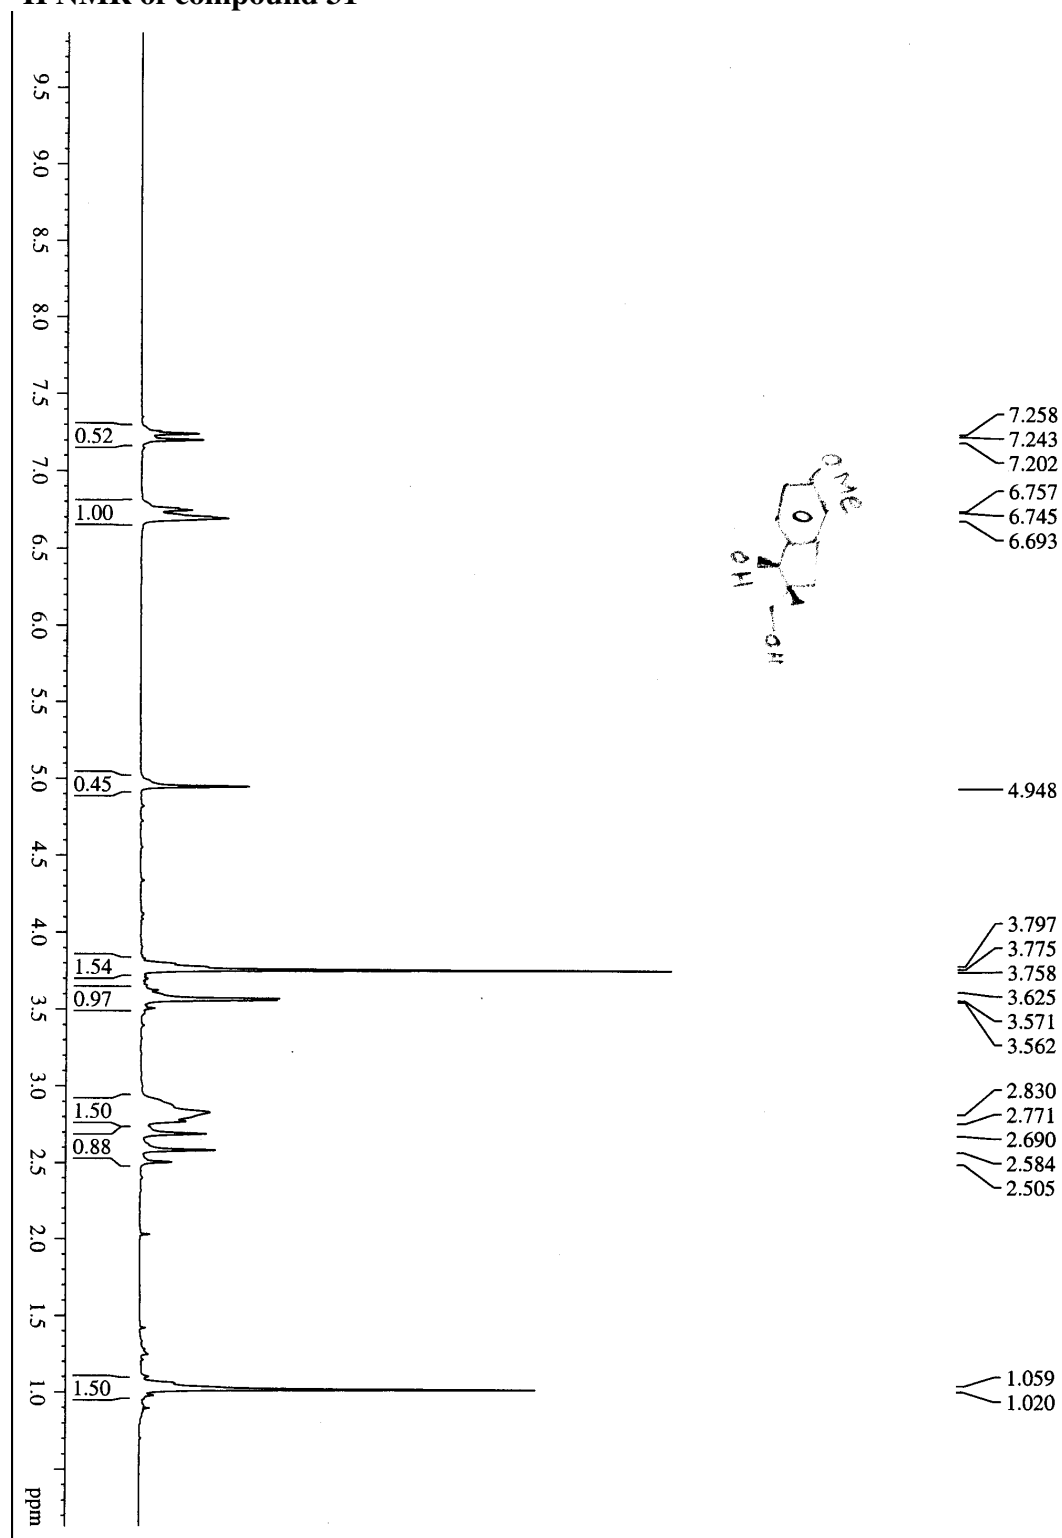

sn/rb/219

# <sup>13</sup>C NMR of compound 31

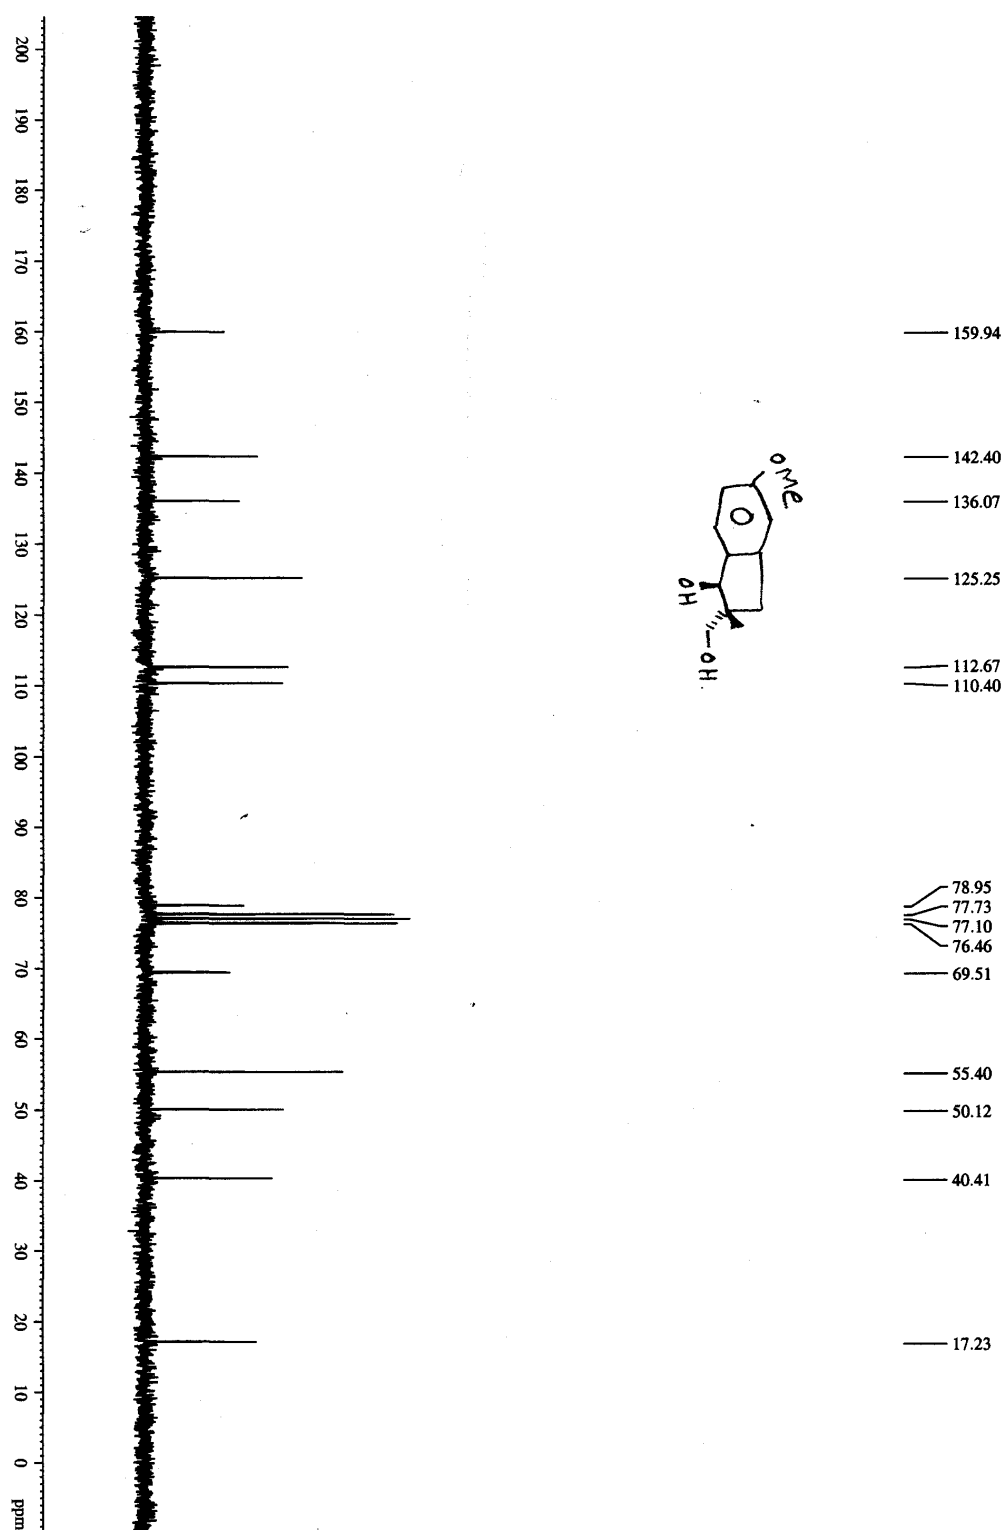

# <sup>1</sup>H NMR of compound ent-32

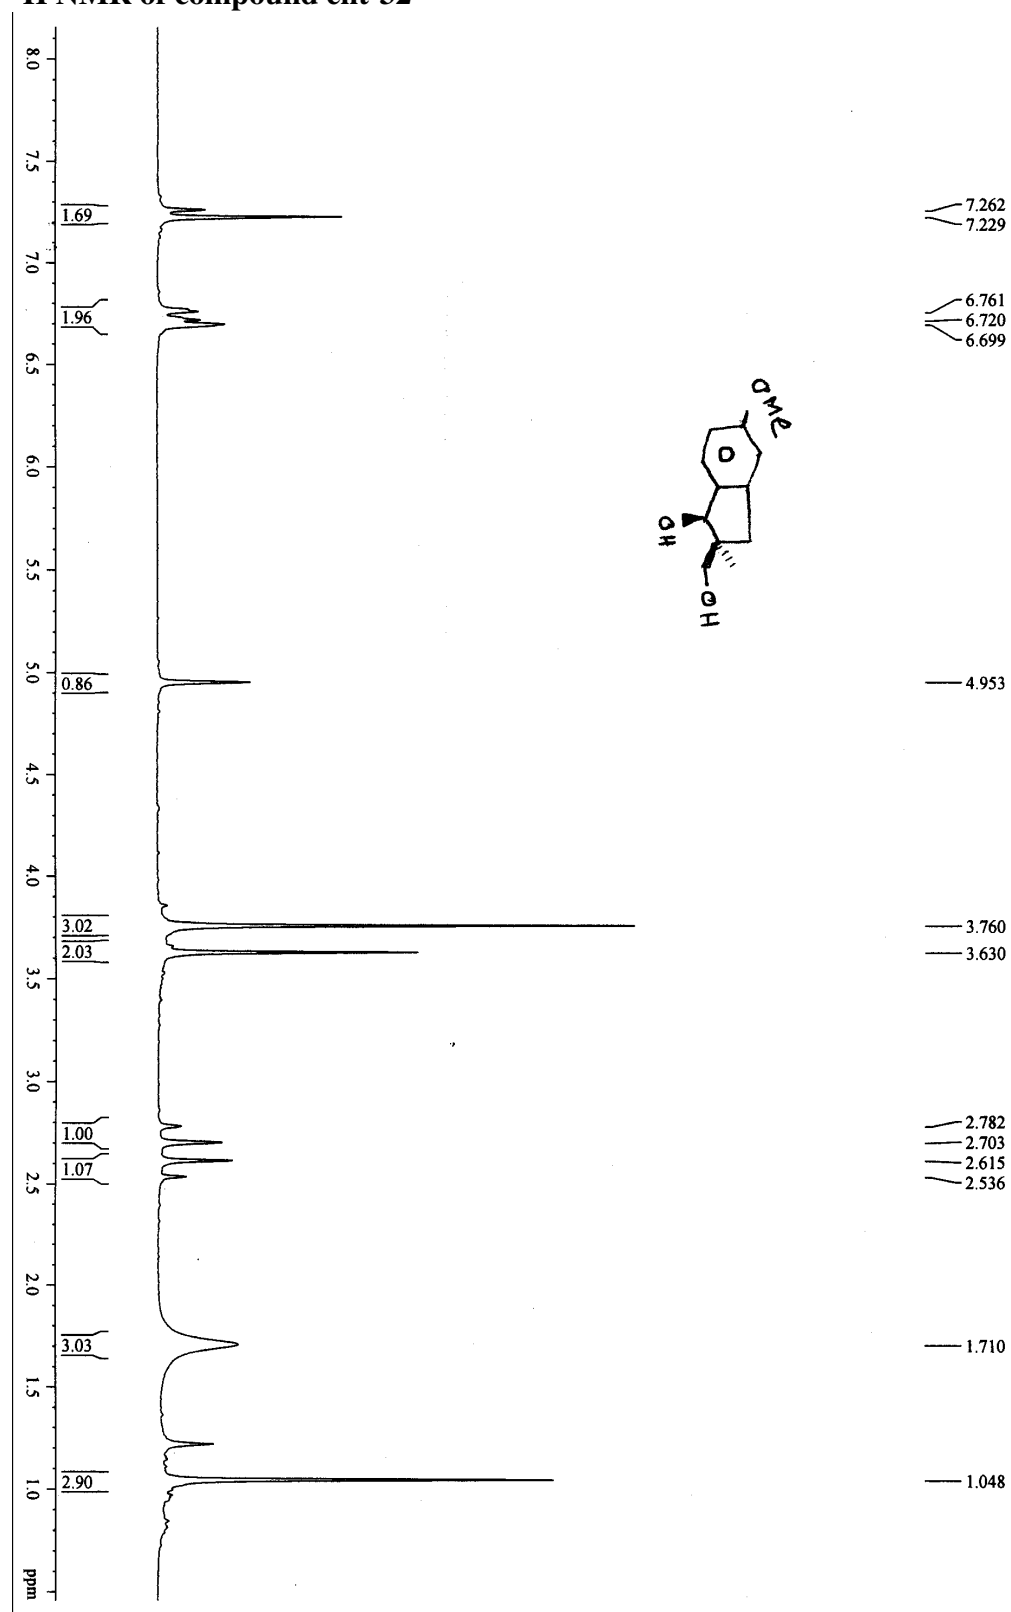

sn/rb/341  
PROTON CDCl<sub>3</sub> D:\ IITK 2

# <sup>13</sup>C NMR of compound ent-32

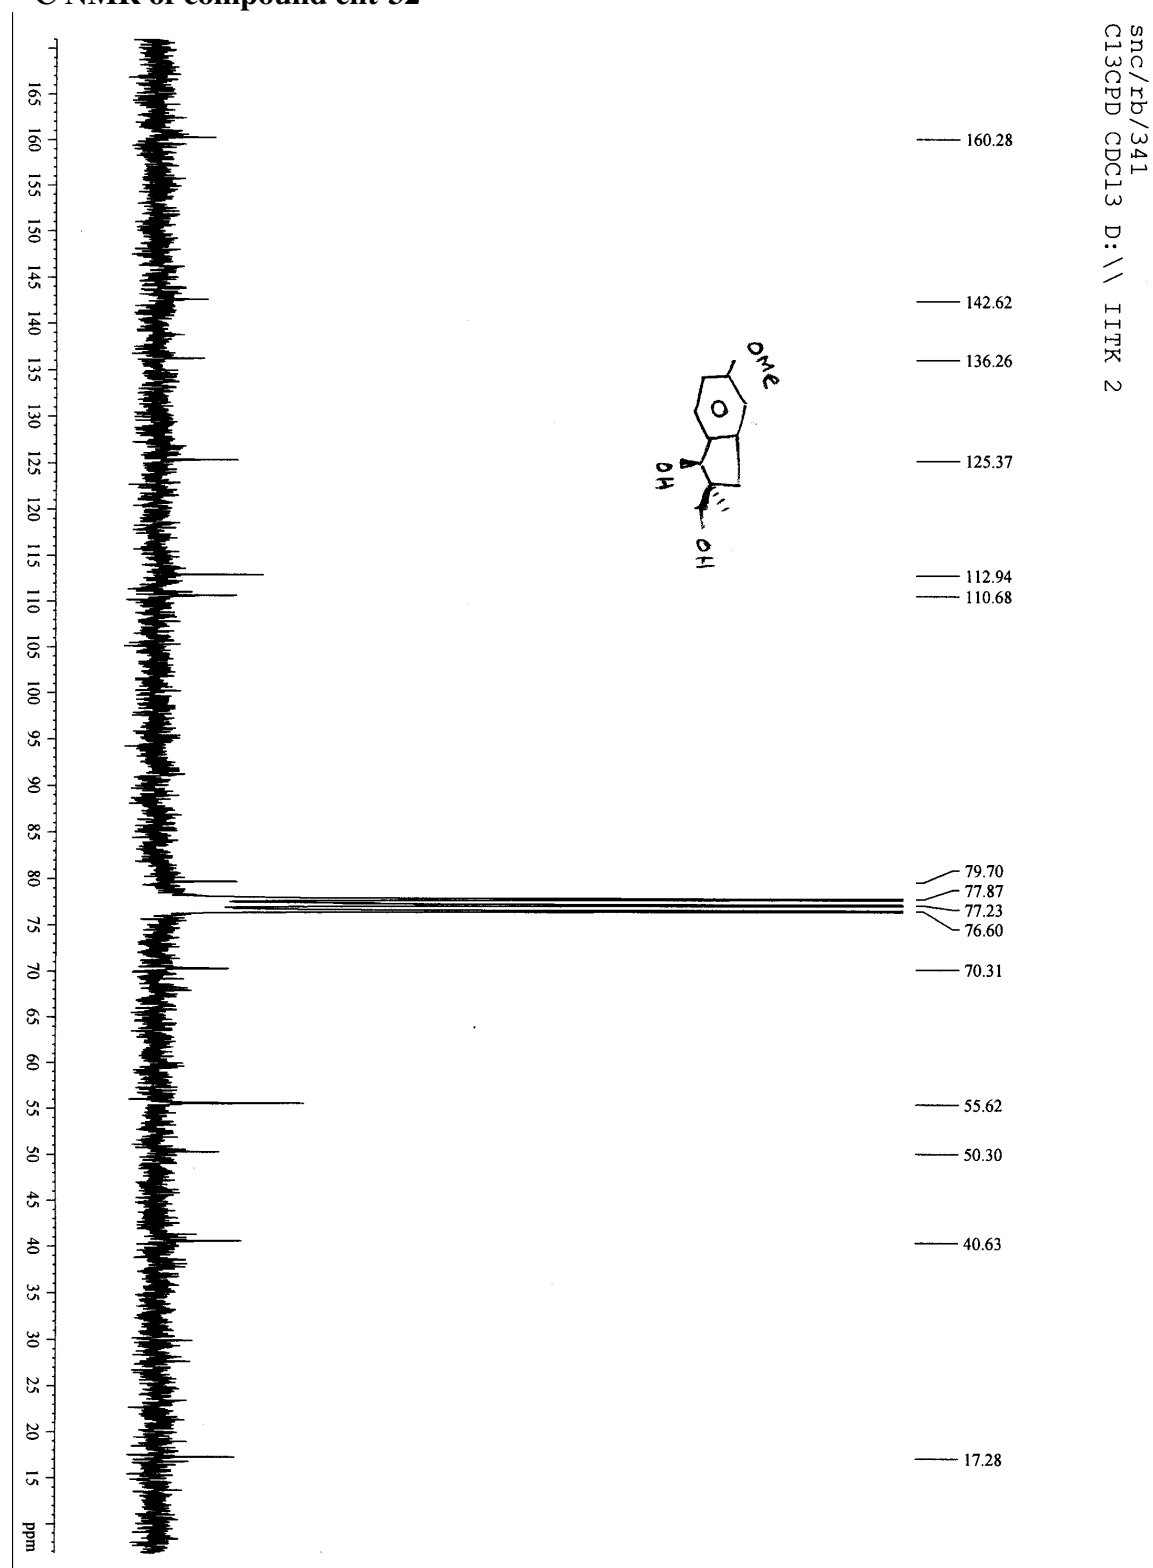

# <sup>1</sup>H NMR of compound 33

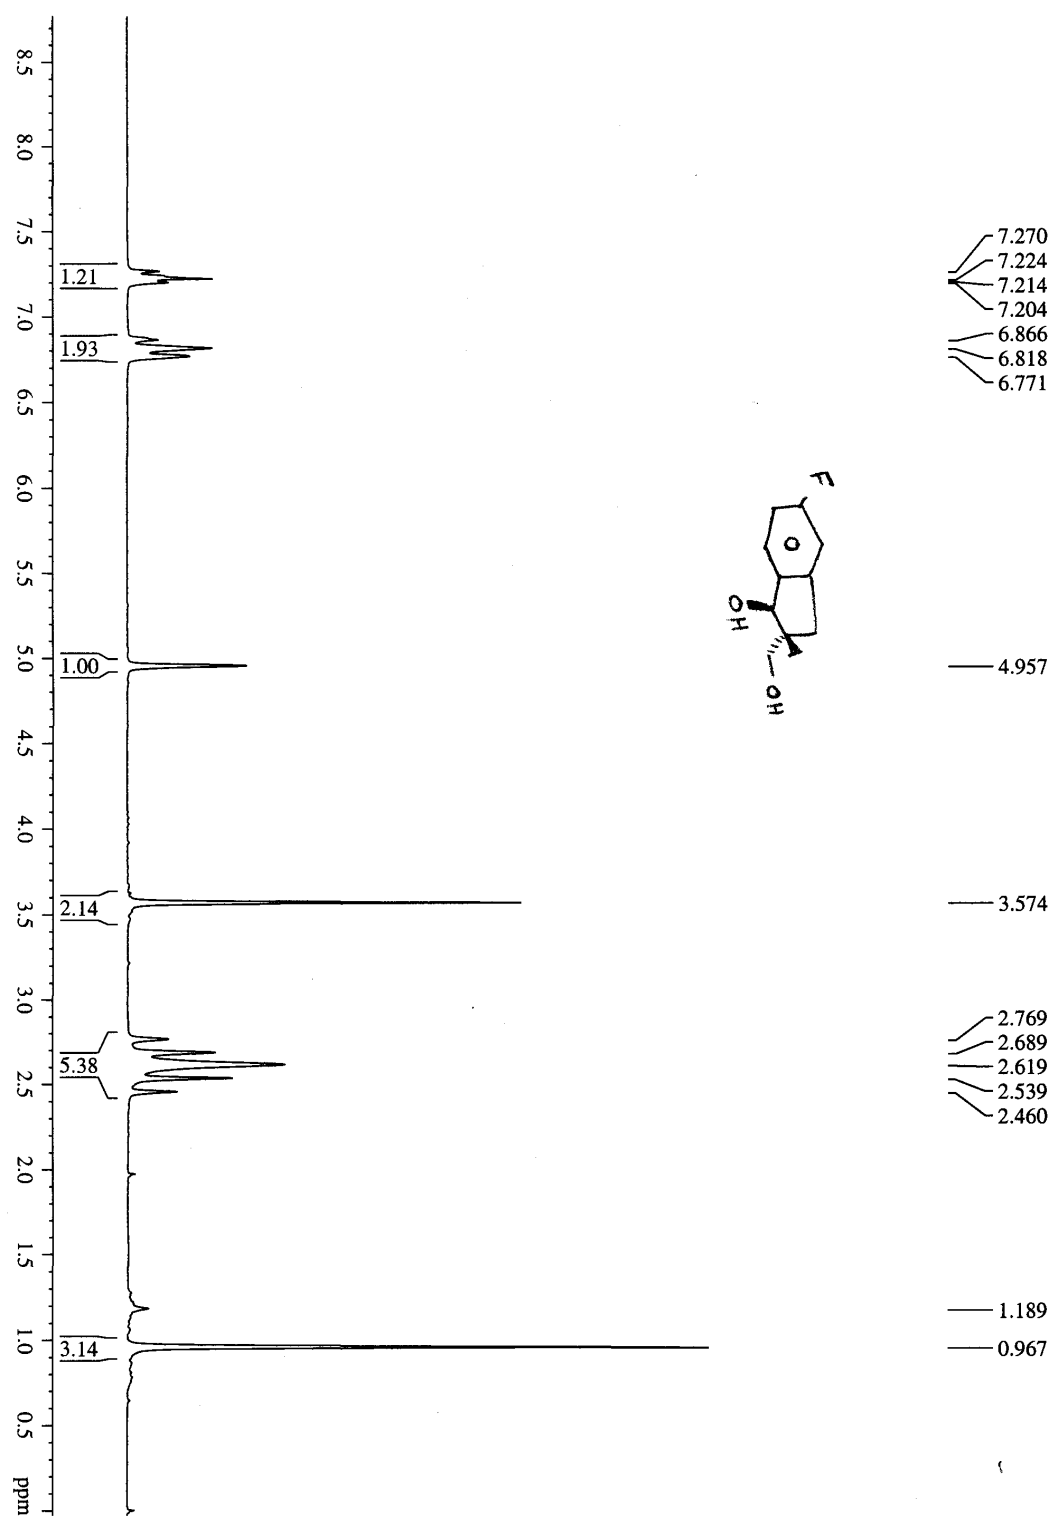

sn/rb/236

# <sup>13</sup>C NMR of compound 33

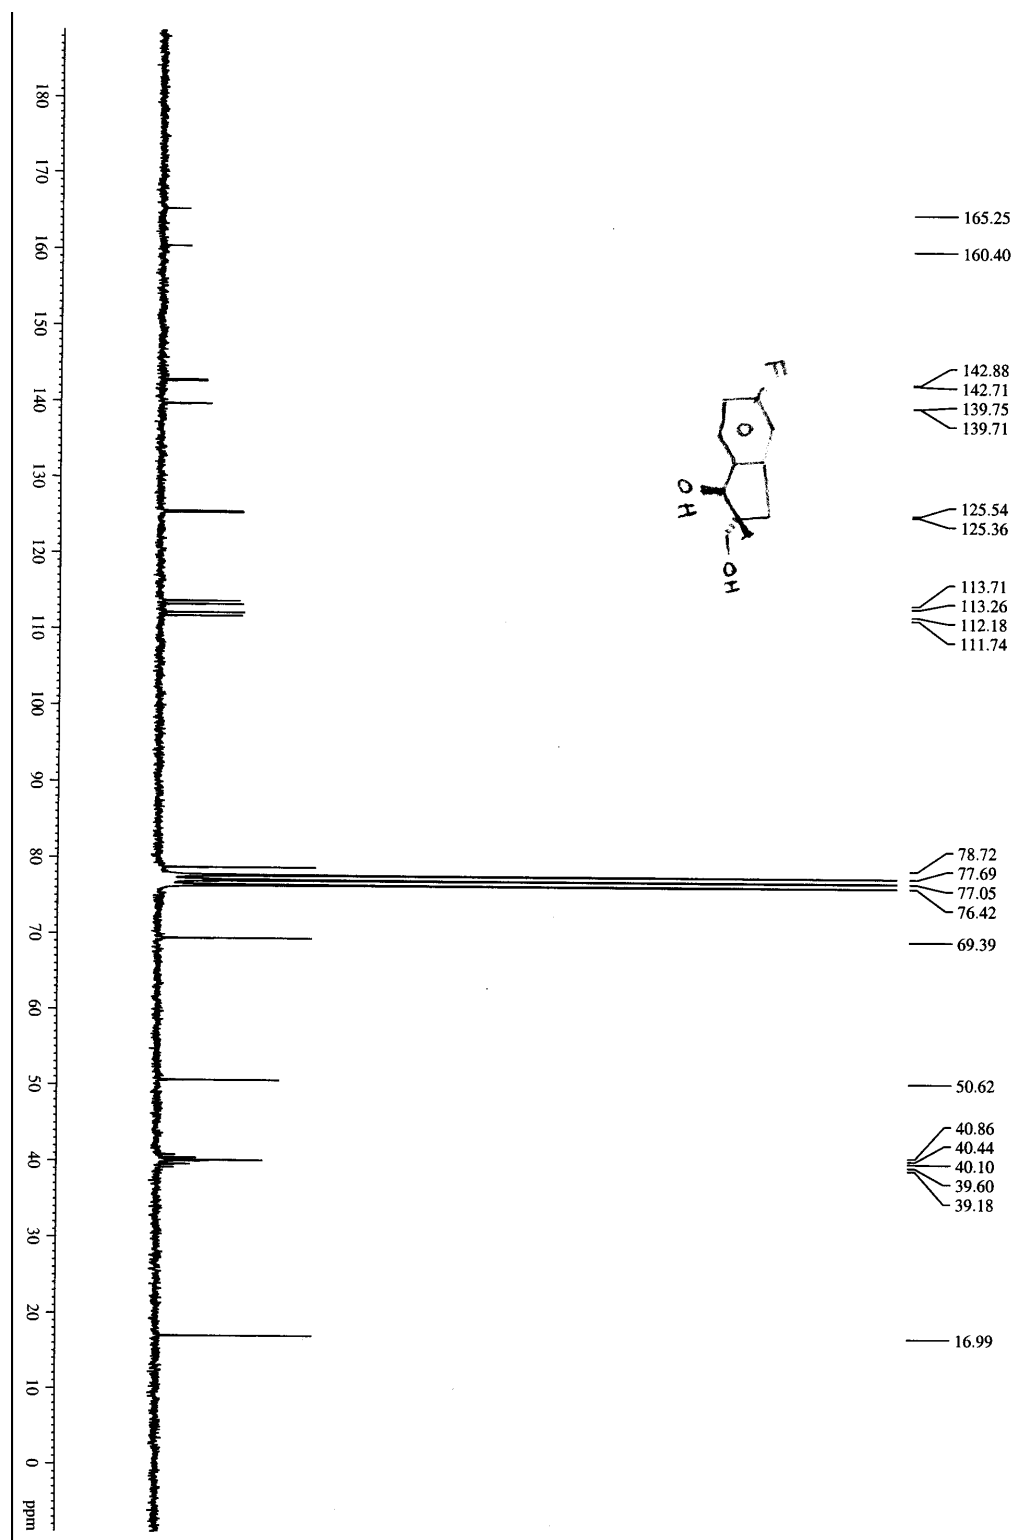

snc/rb/236



# <sup>1</sup>H NMR of compound ent-34

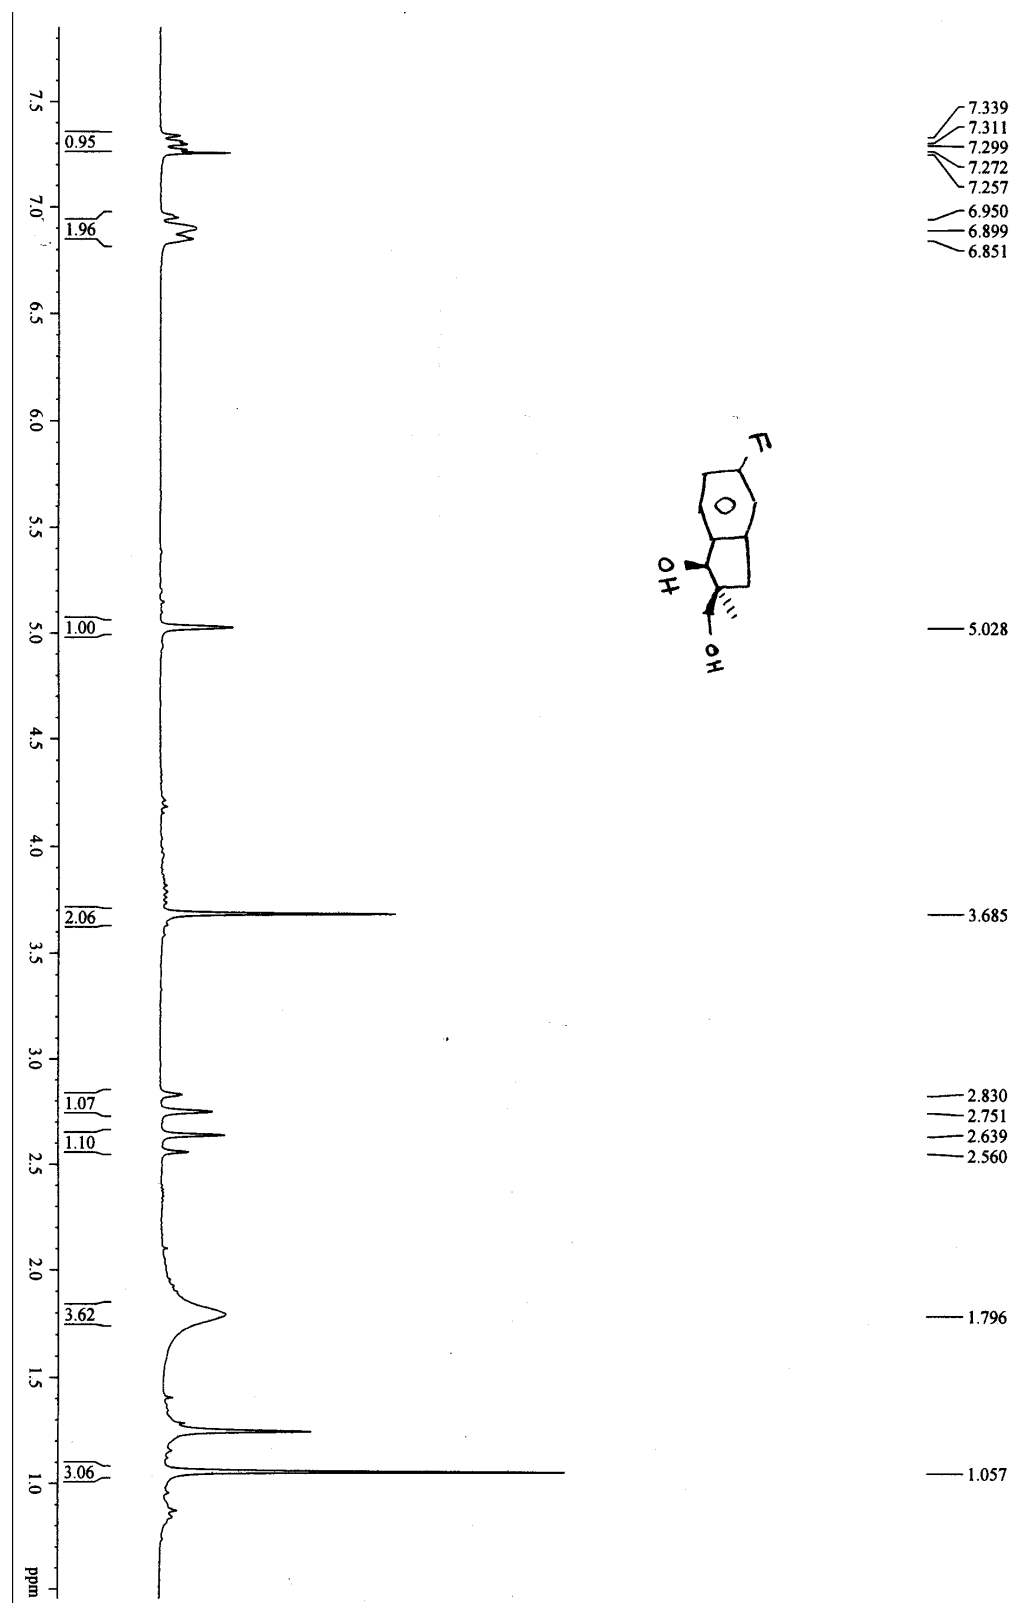

# <sup>13</sup>C NMR of compound ent-34

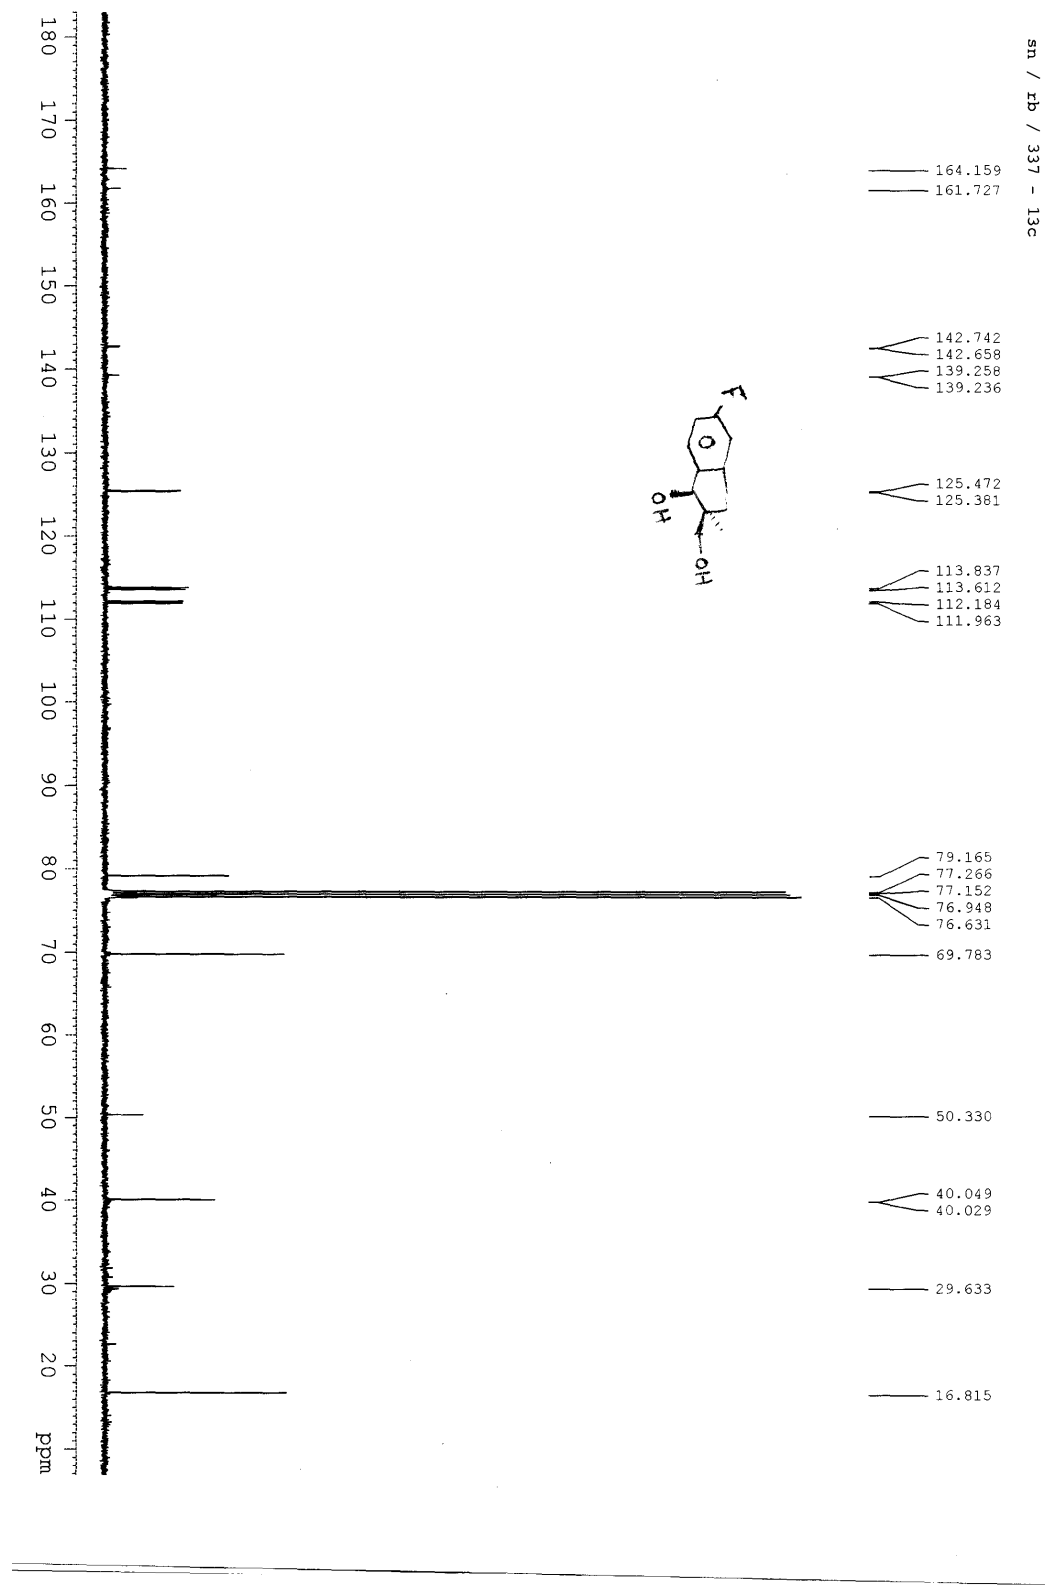

# <sup>1</sup>H NMR of compound 35

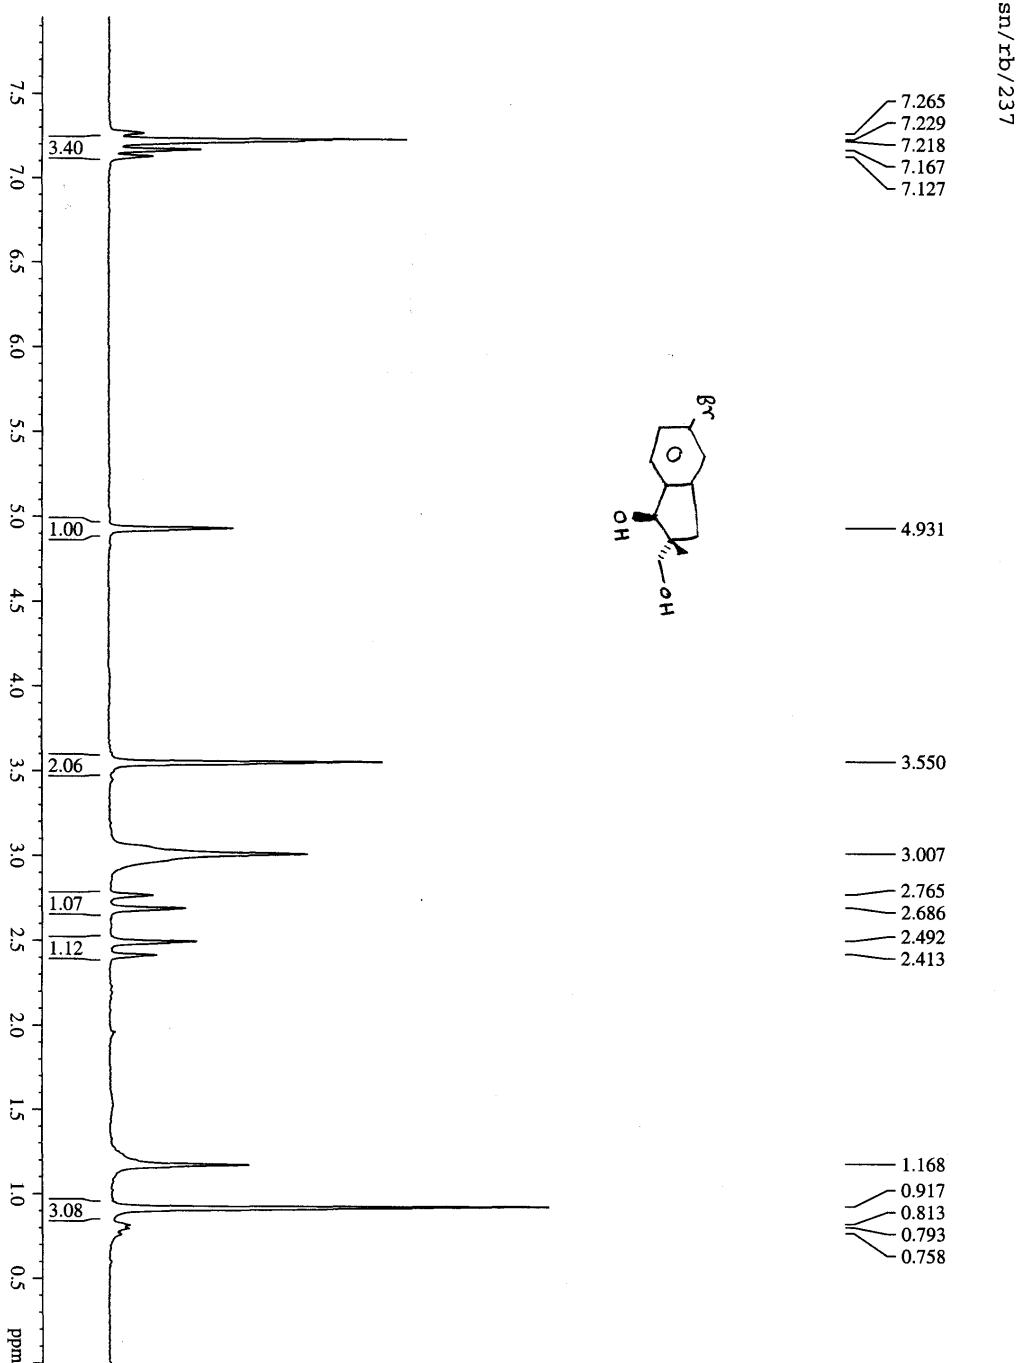

# <sup>13</sup>C NMR of compound 35

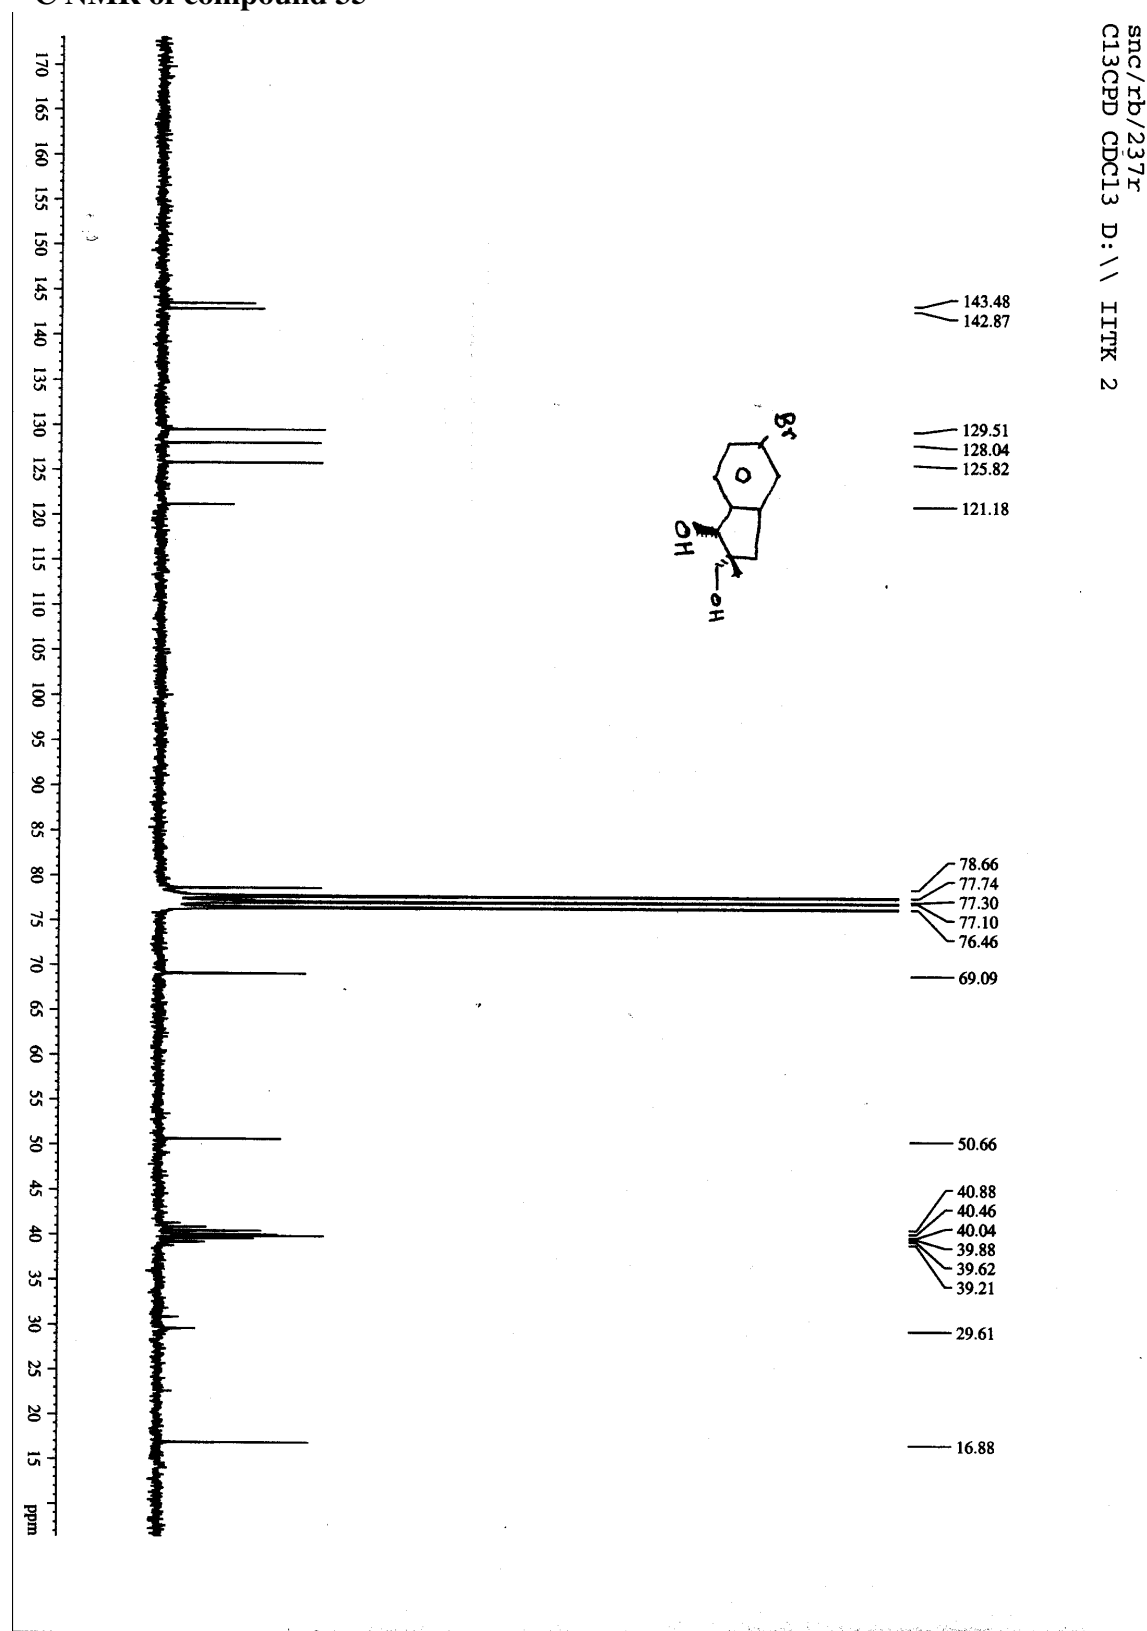

**$^1\text{H}$  NMR of compound 36**

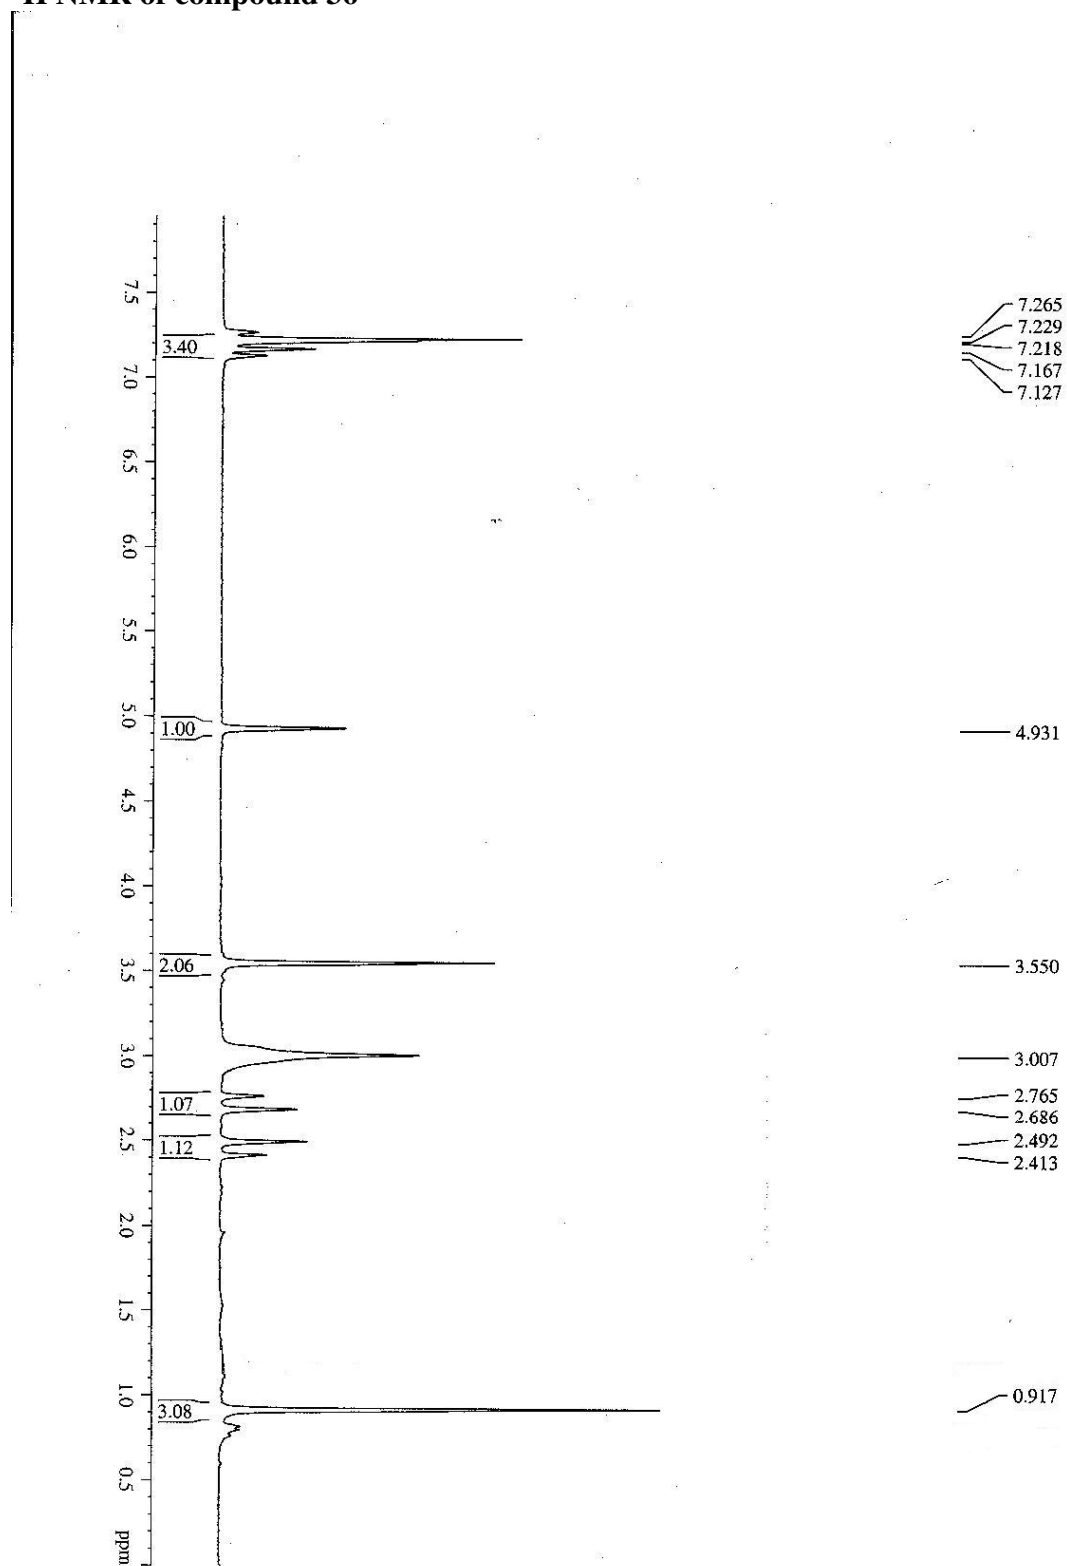

# <sup>13</sup>C NMR of compound 36

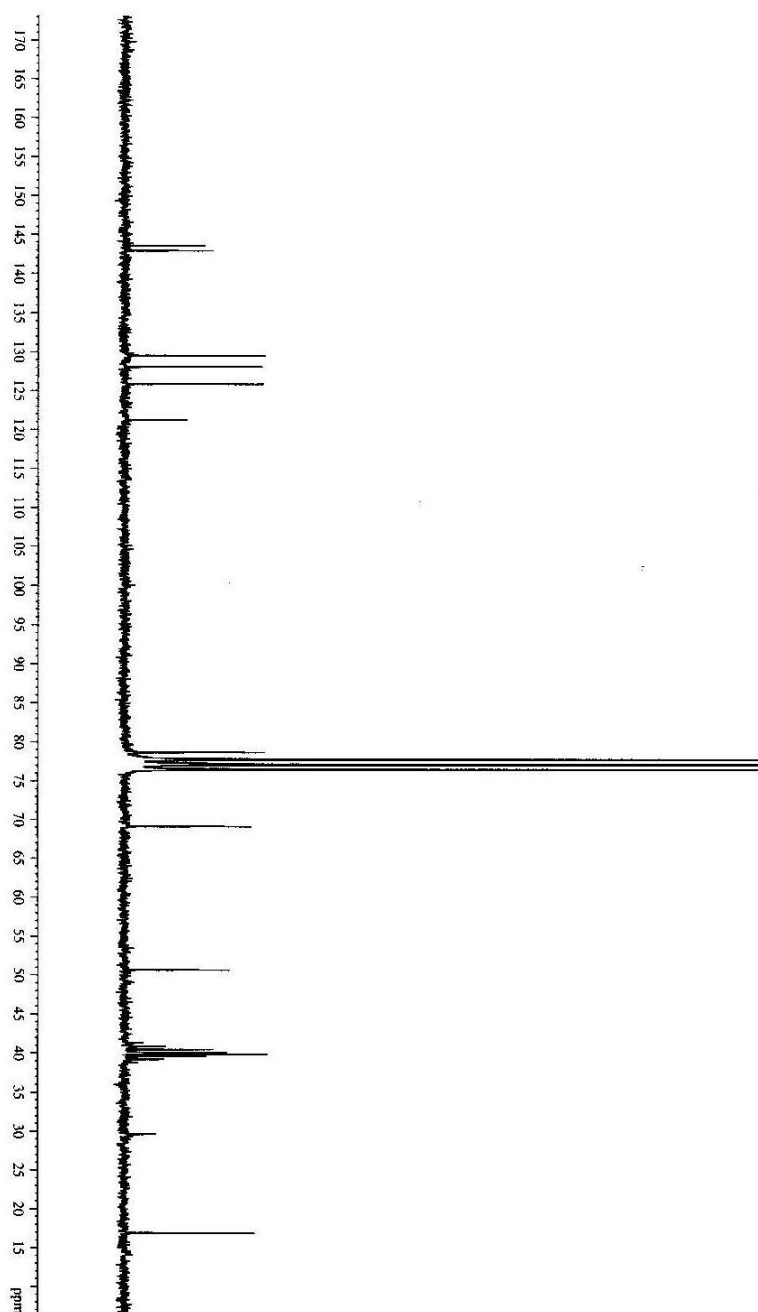

**<sup>1</sup>H NMR of compound ent-37**

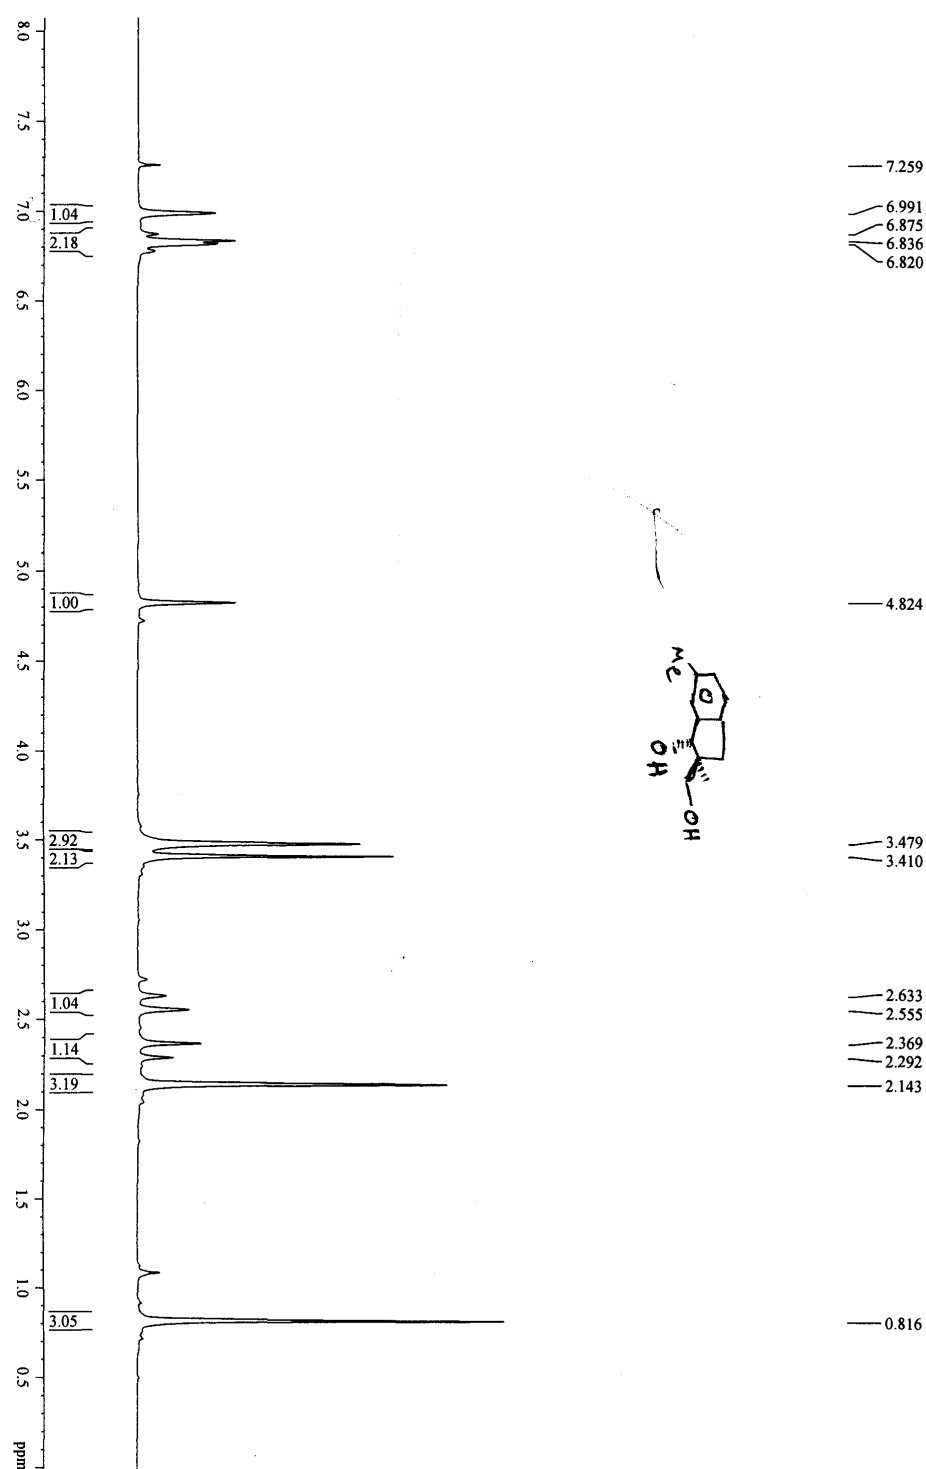

sn / rb / 347

# <sup>13</sup>C NMR of compound ent-37

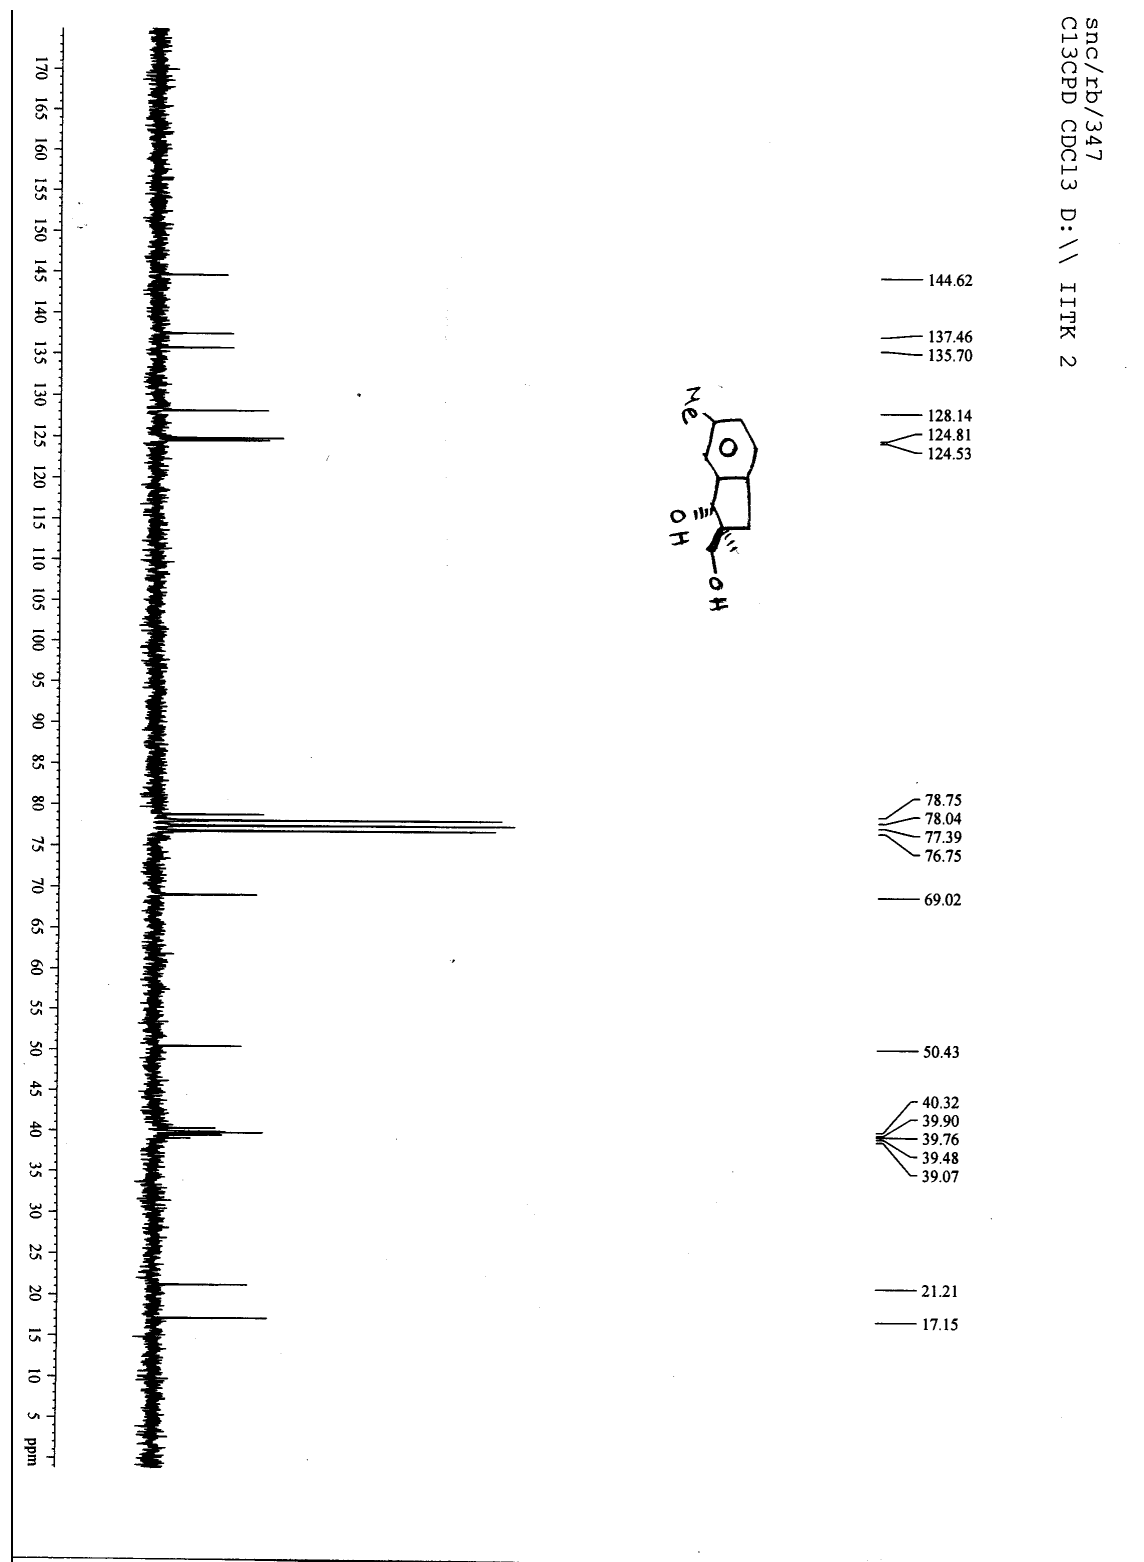



# <sup>1</sup>H NMR of compound ent-38

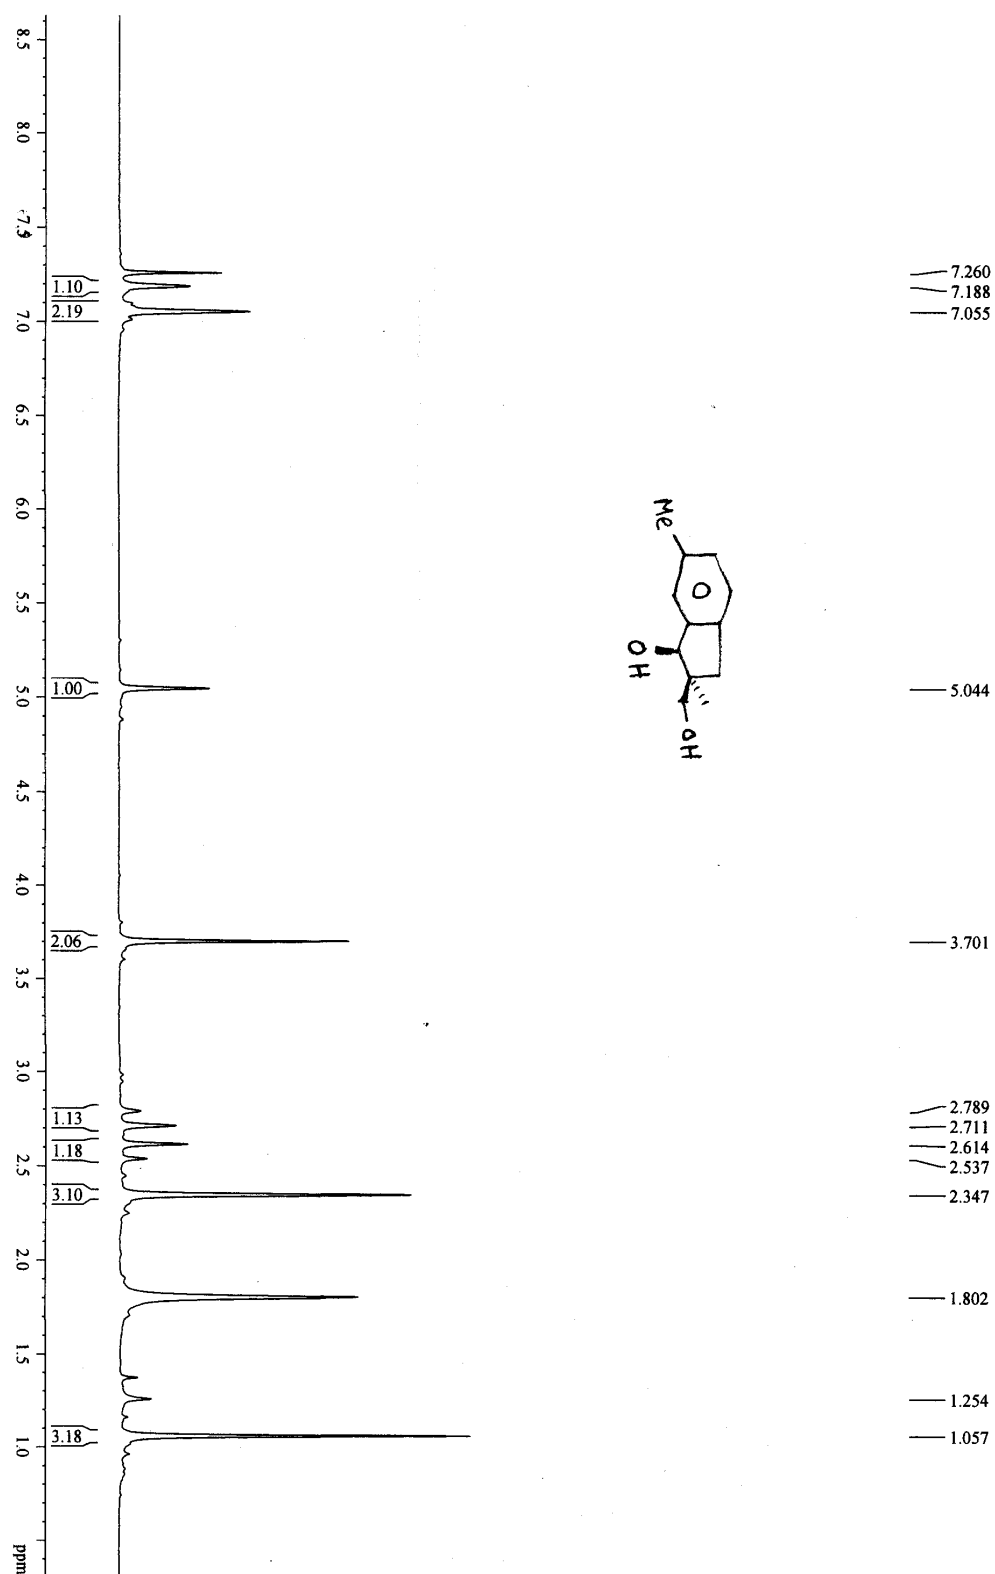

sn / rb / 348

# <sup>13</sup>C NMR of compound ent-38

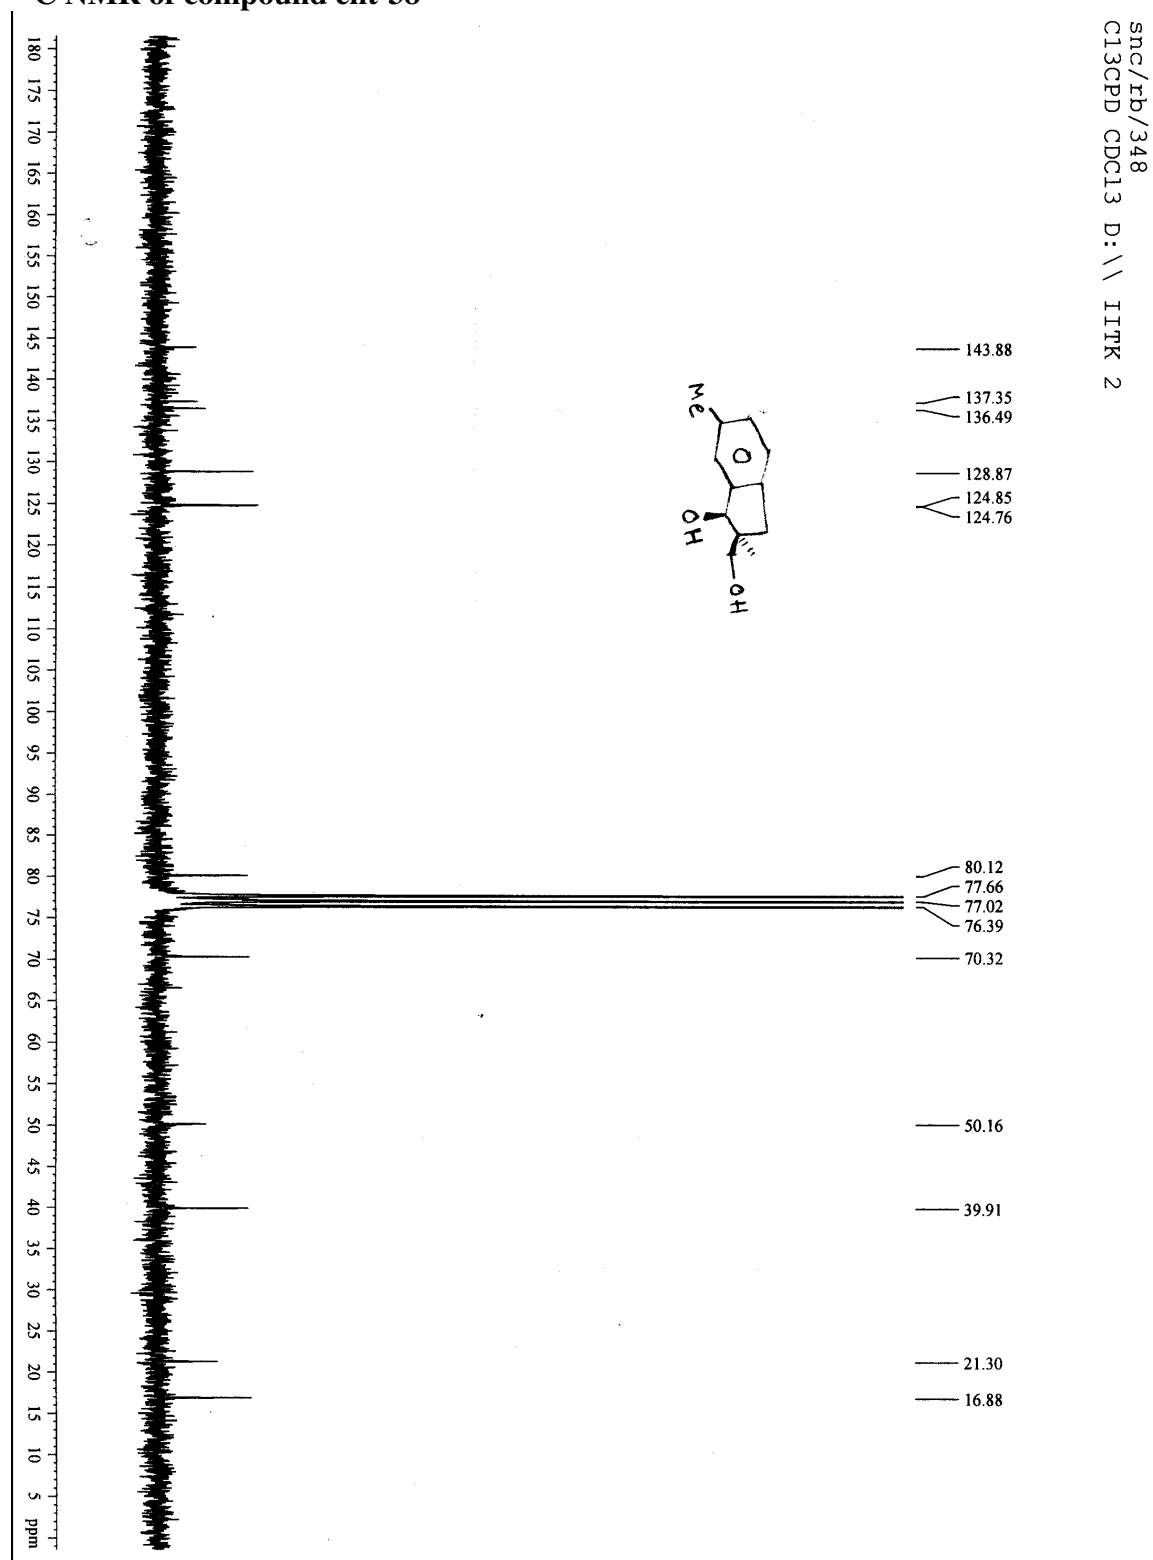

**<sup>1</sup>H NMR of compound 39**

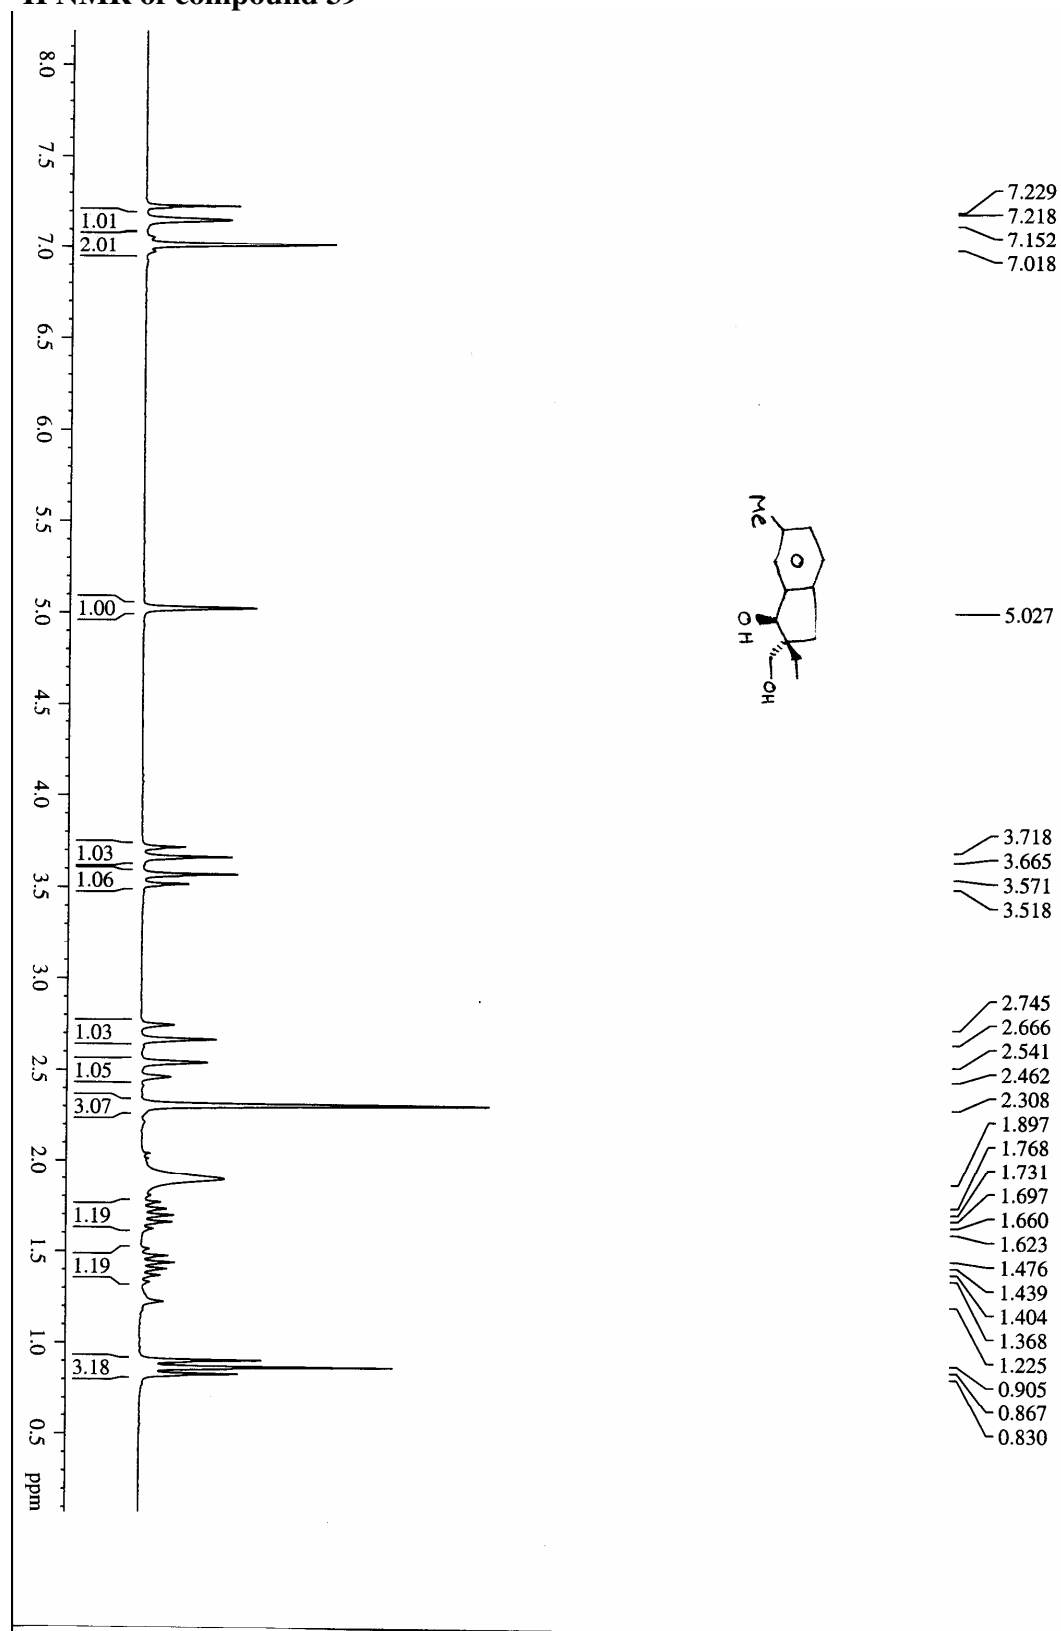

# <sup>13</sup>C NMR of compound 39

snc/rb/240  
C13CPD CDCl3 D:\ IITK 2

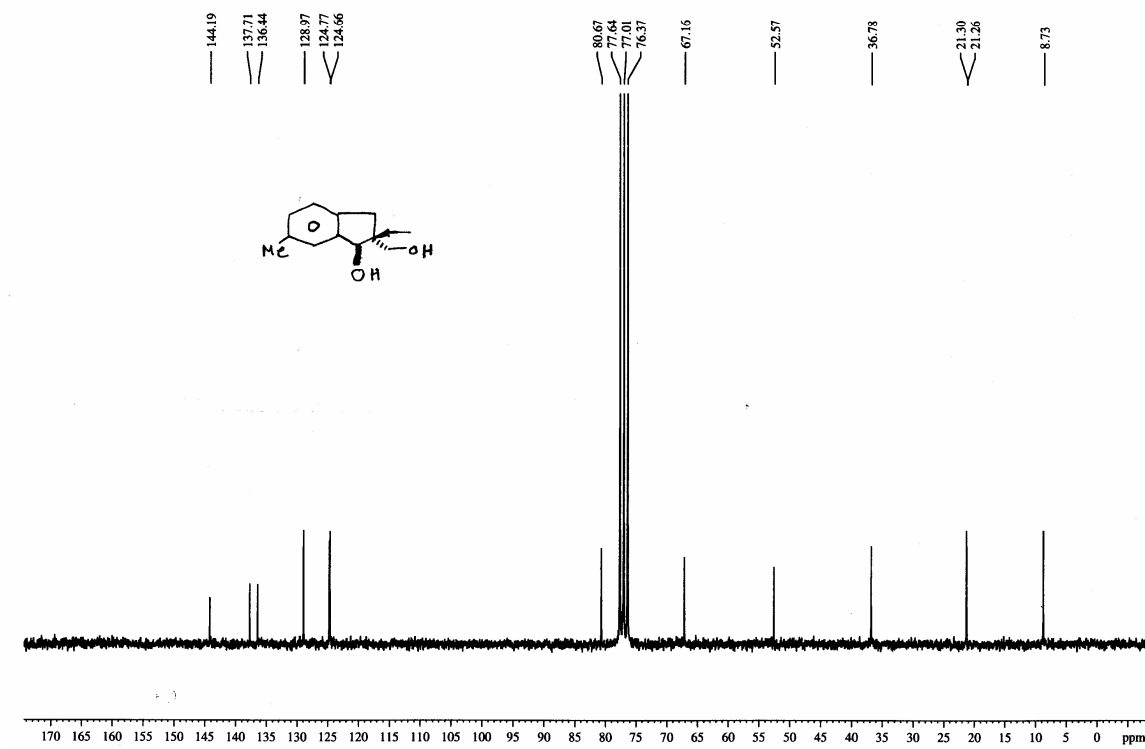

# **<sup>1</sup>H NMR of compound 40**

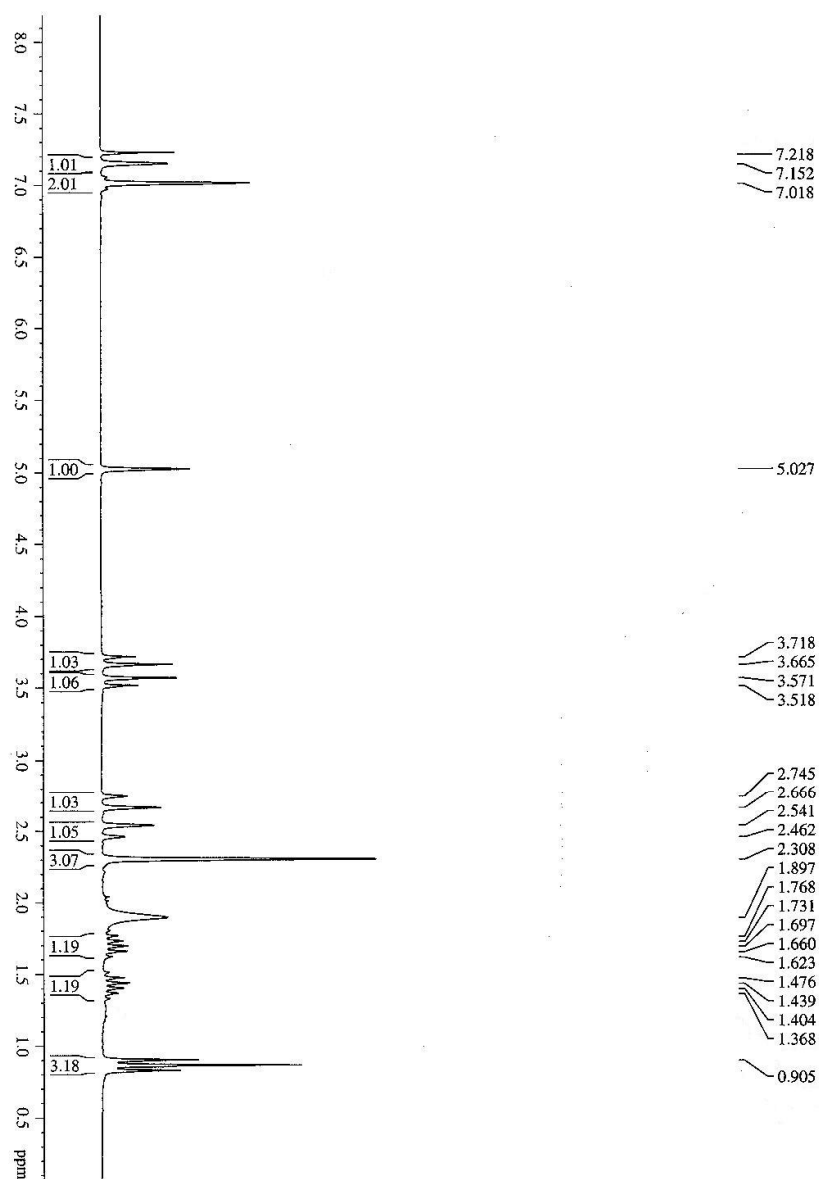

**$^{13}\text{C}$  NMR of compound 40**

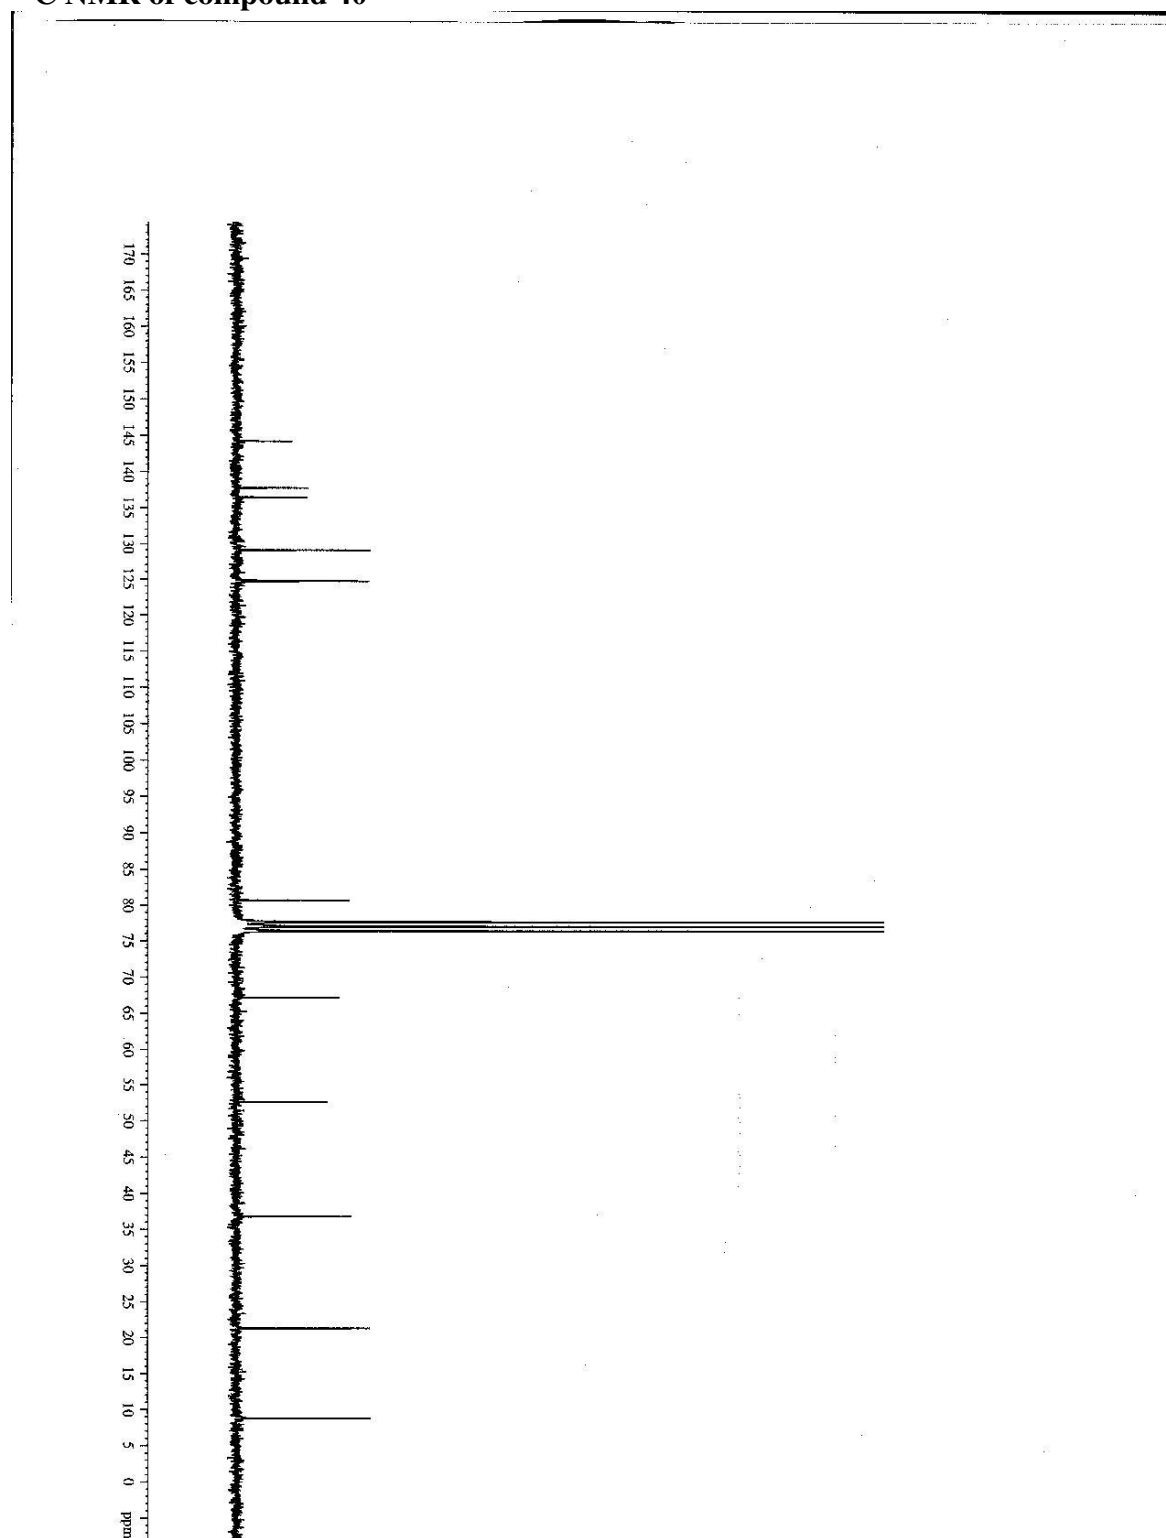

# <sup>1</sup>H NMR of compound 41

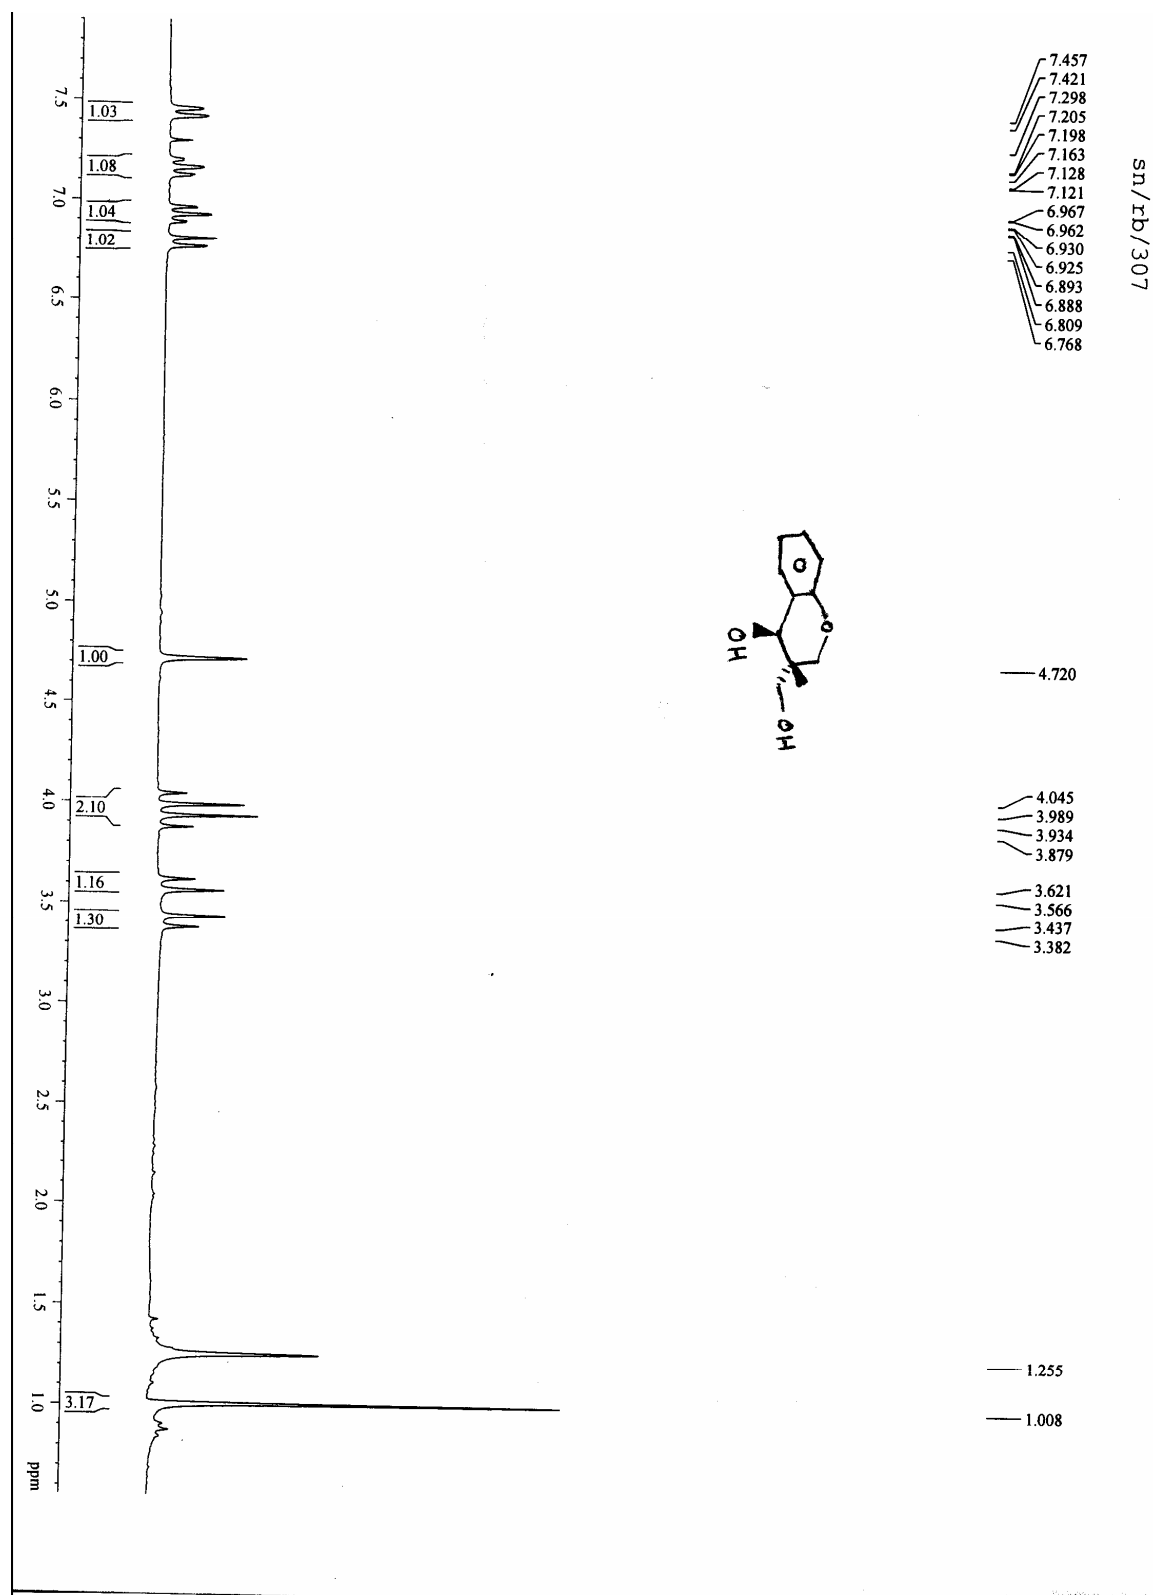

# <sup>13</sup>C NMR of compound 41

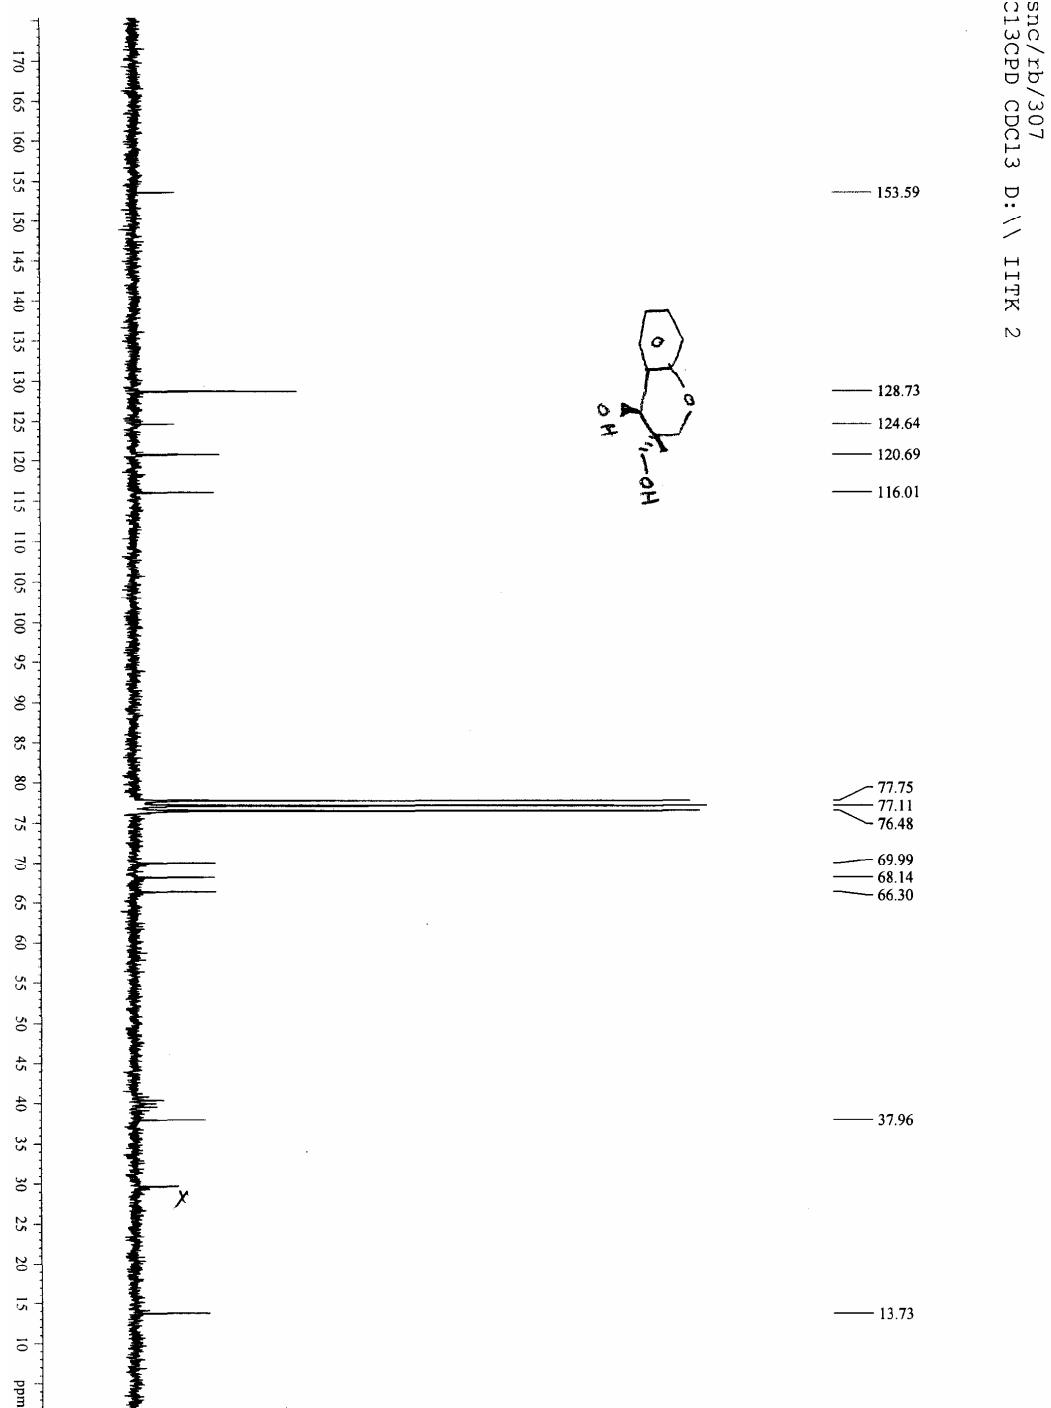



# <sup>1</sup>H NMR of compound 42

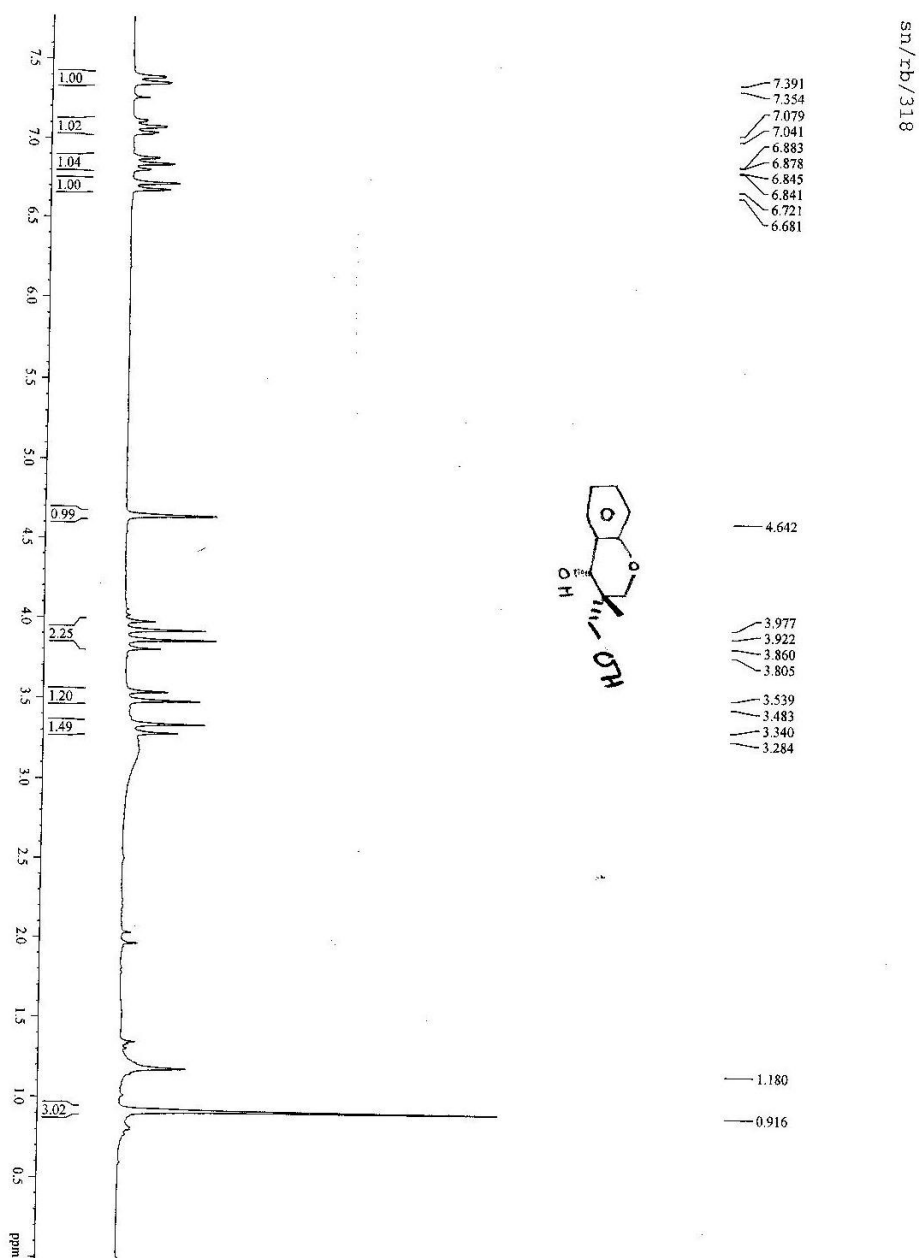

# <sup>13</sup>C NMR of Compound 42

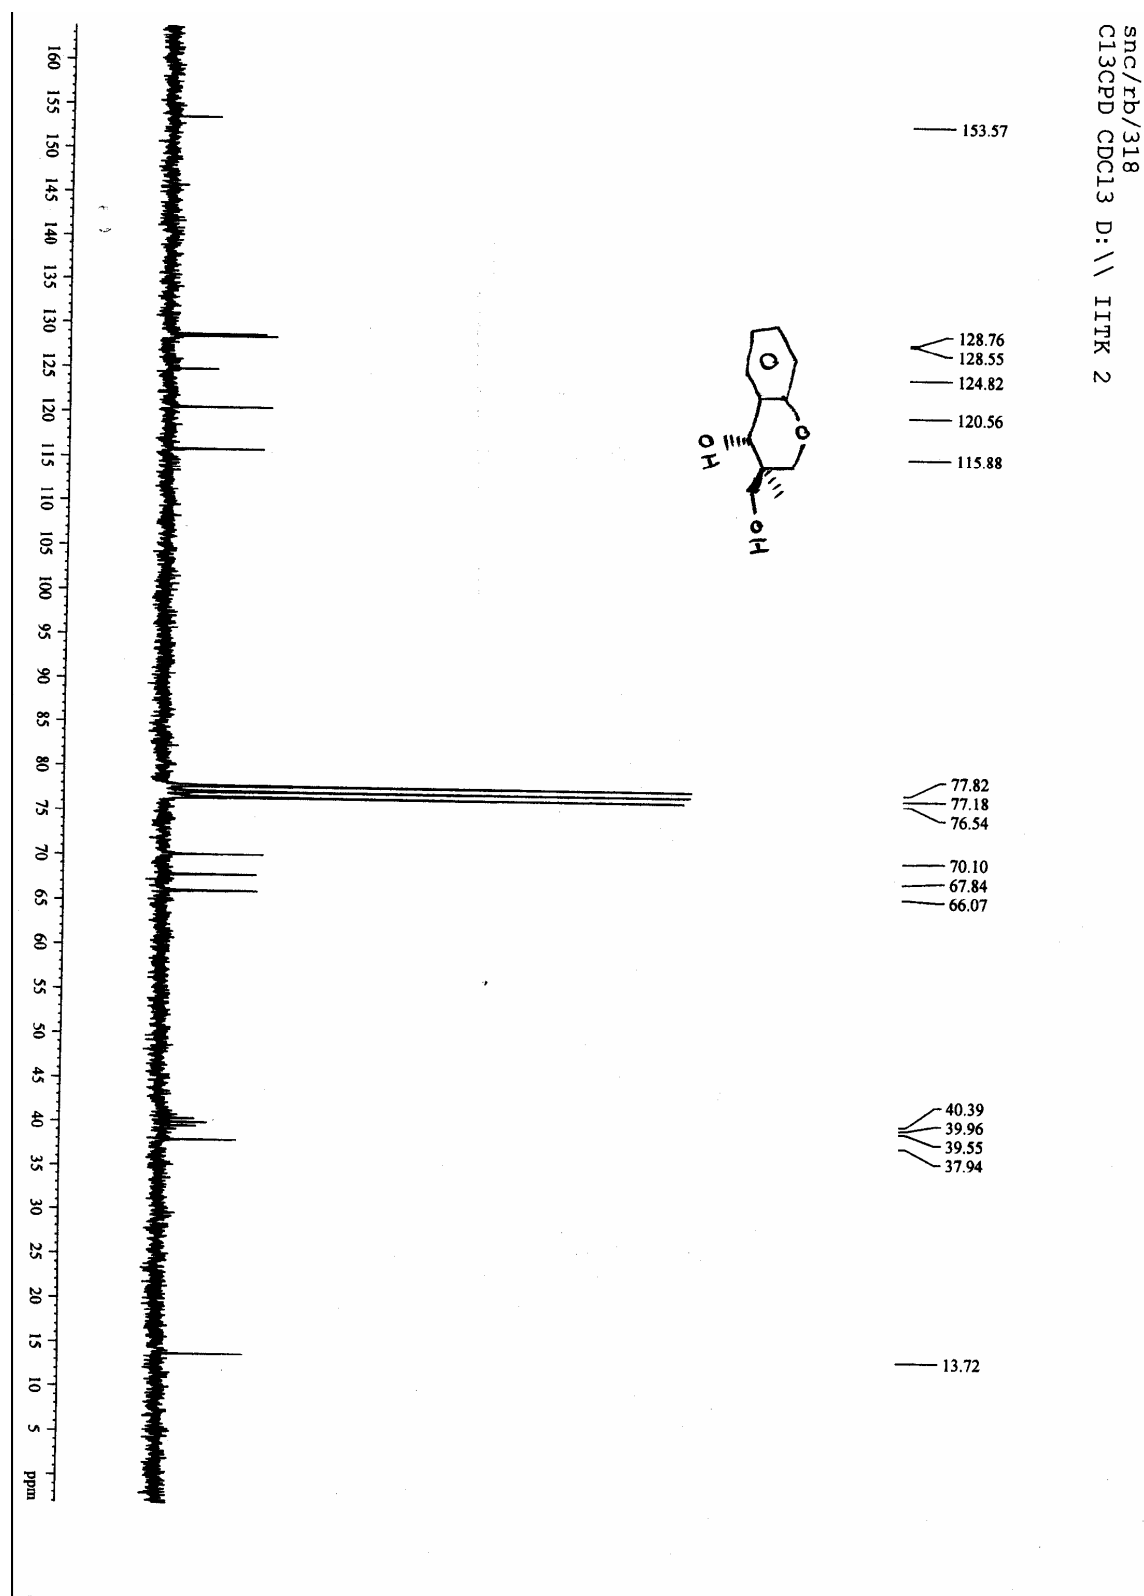

# <sup>1</sup>H NMR of compound 43

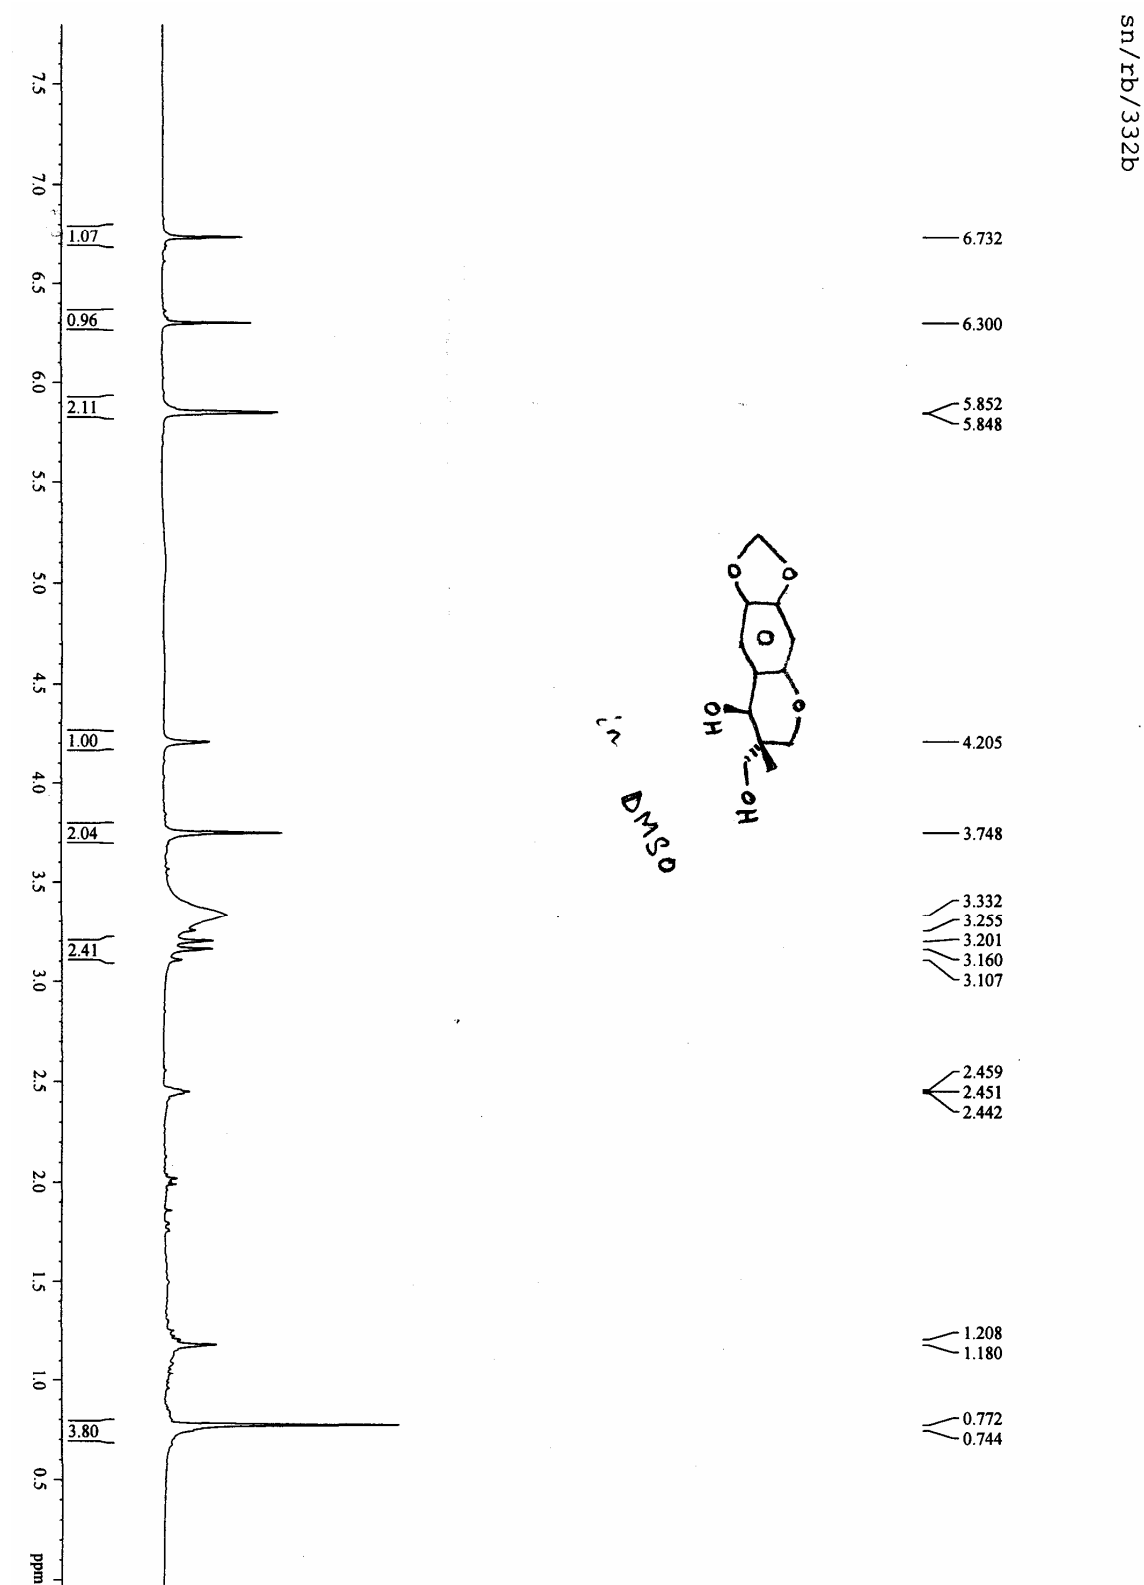

# <sup>13</sup>C NMR of compound 43

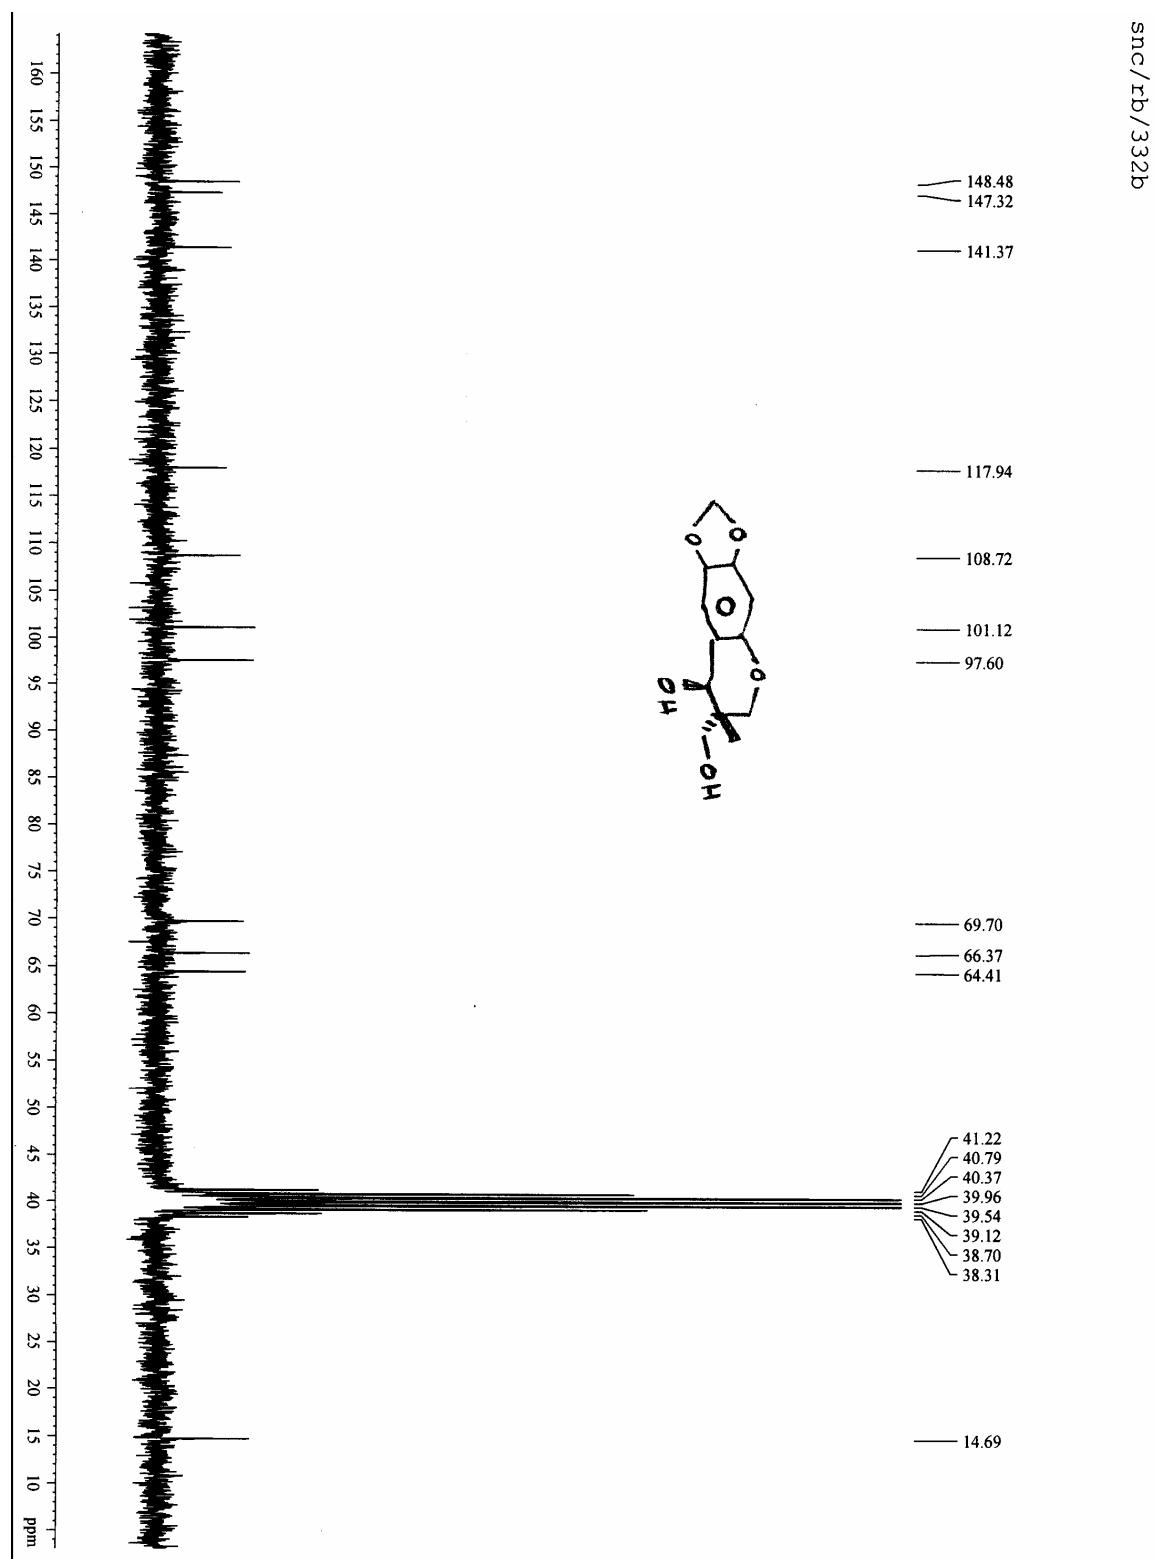

# <sup>1</sup>H NMR of compound 44

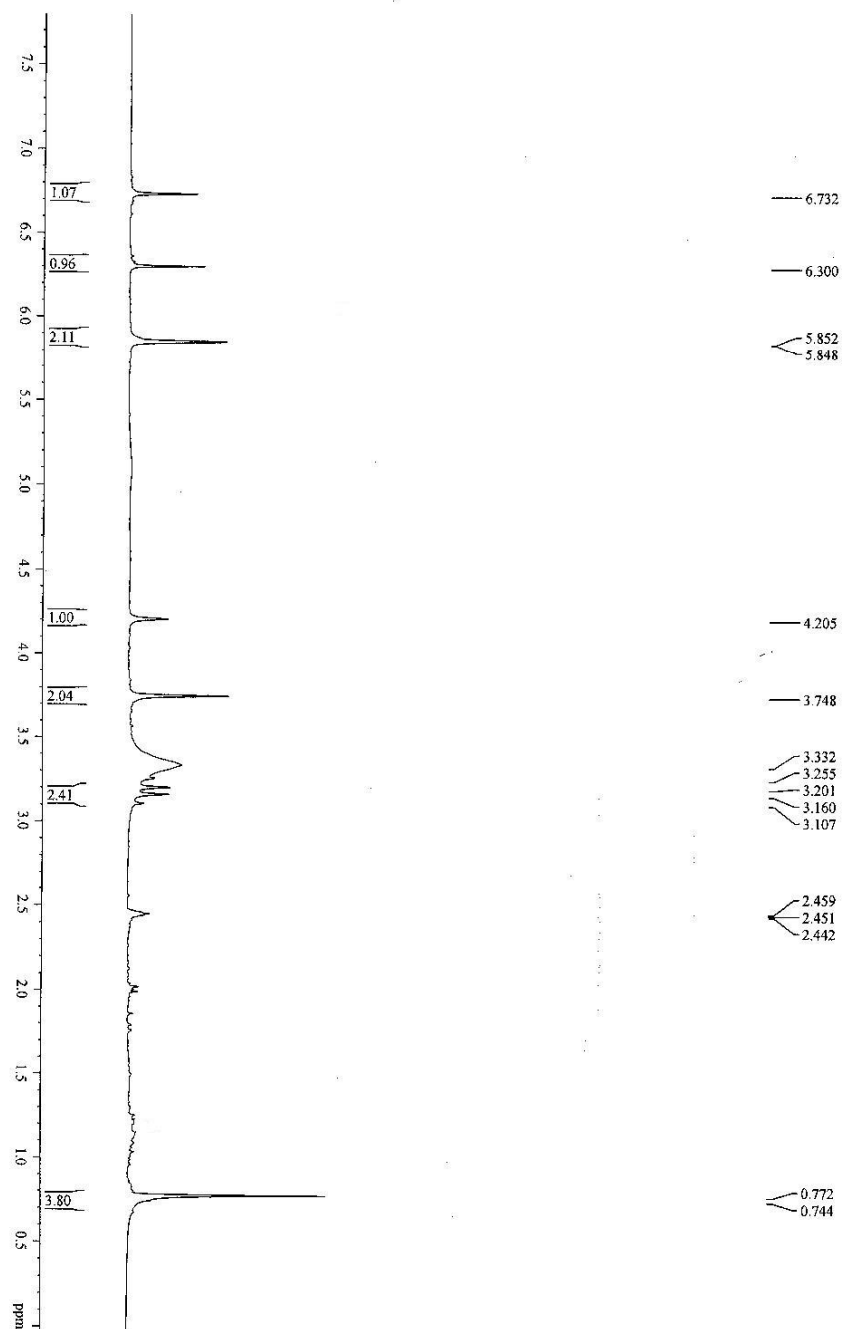

<sup>13</sup>C NMR of compound 44

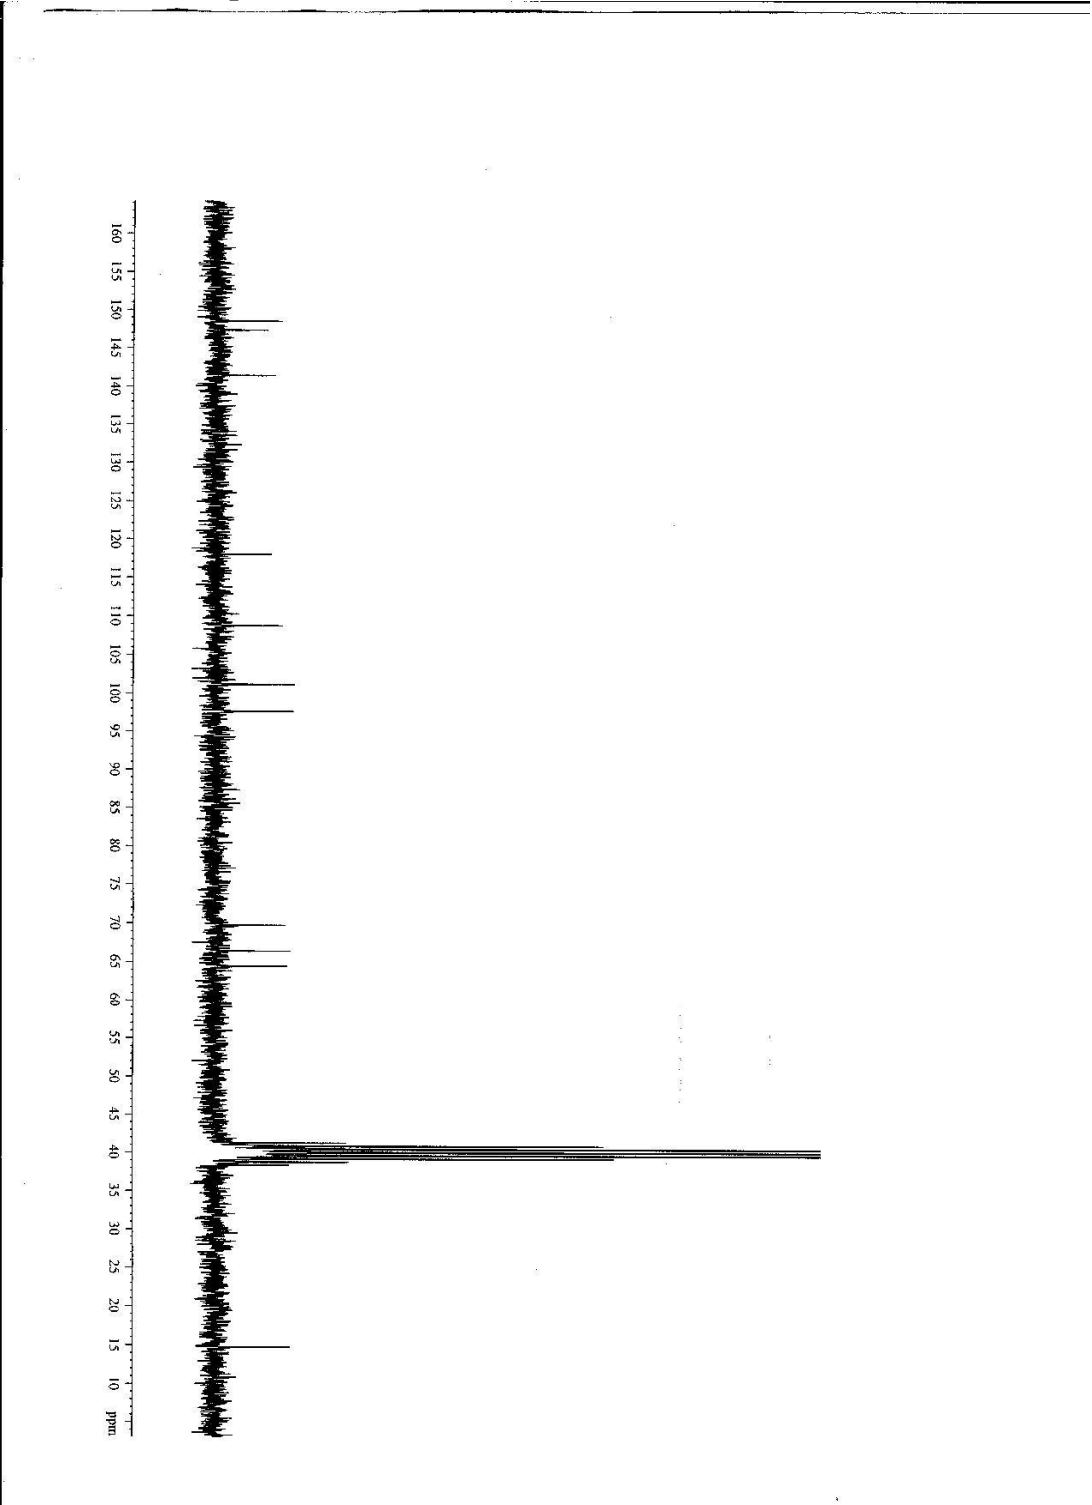

<sup>1</sup>H NMR spectrum of bis PNBz derivative of 18

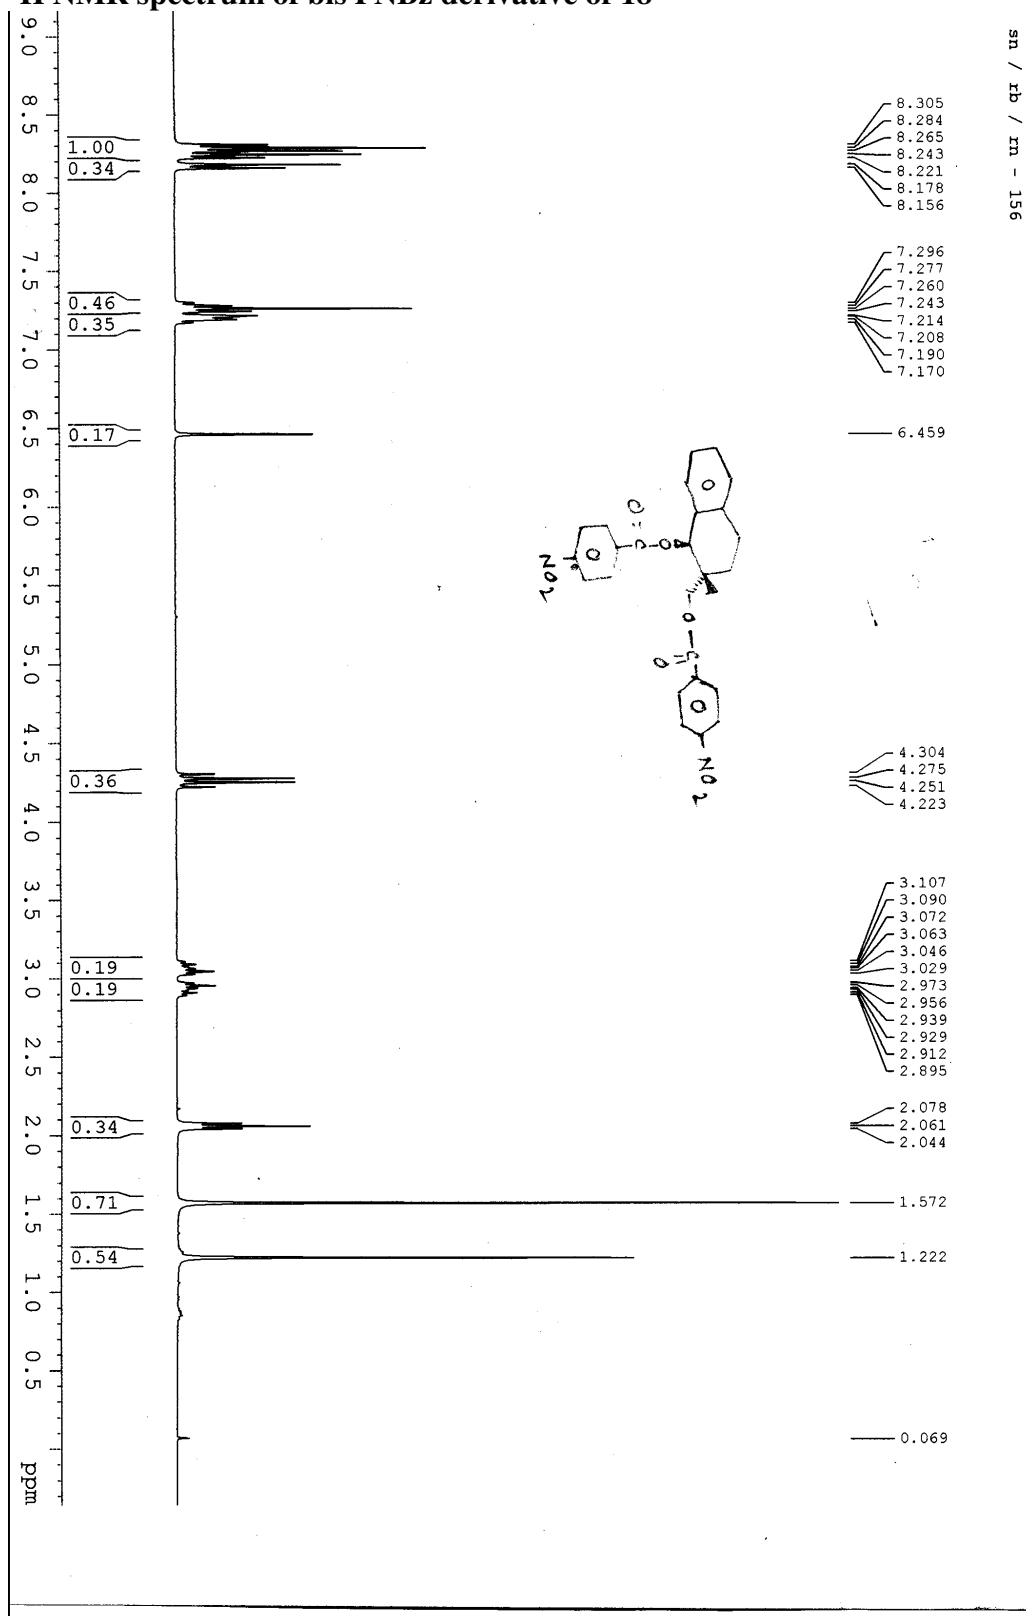

# <sup>13</sup>C NMR spectrum of bis PNBz derivative of 18

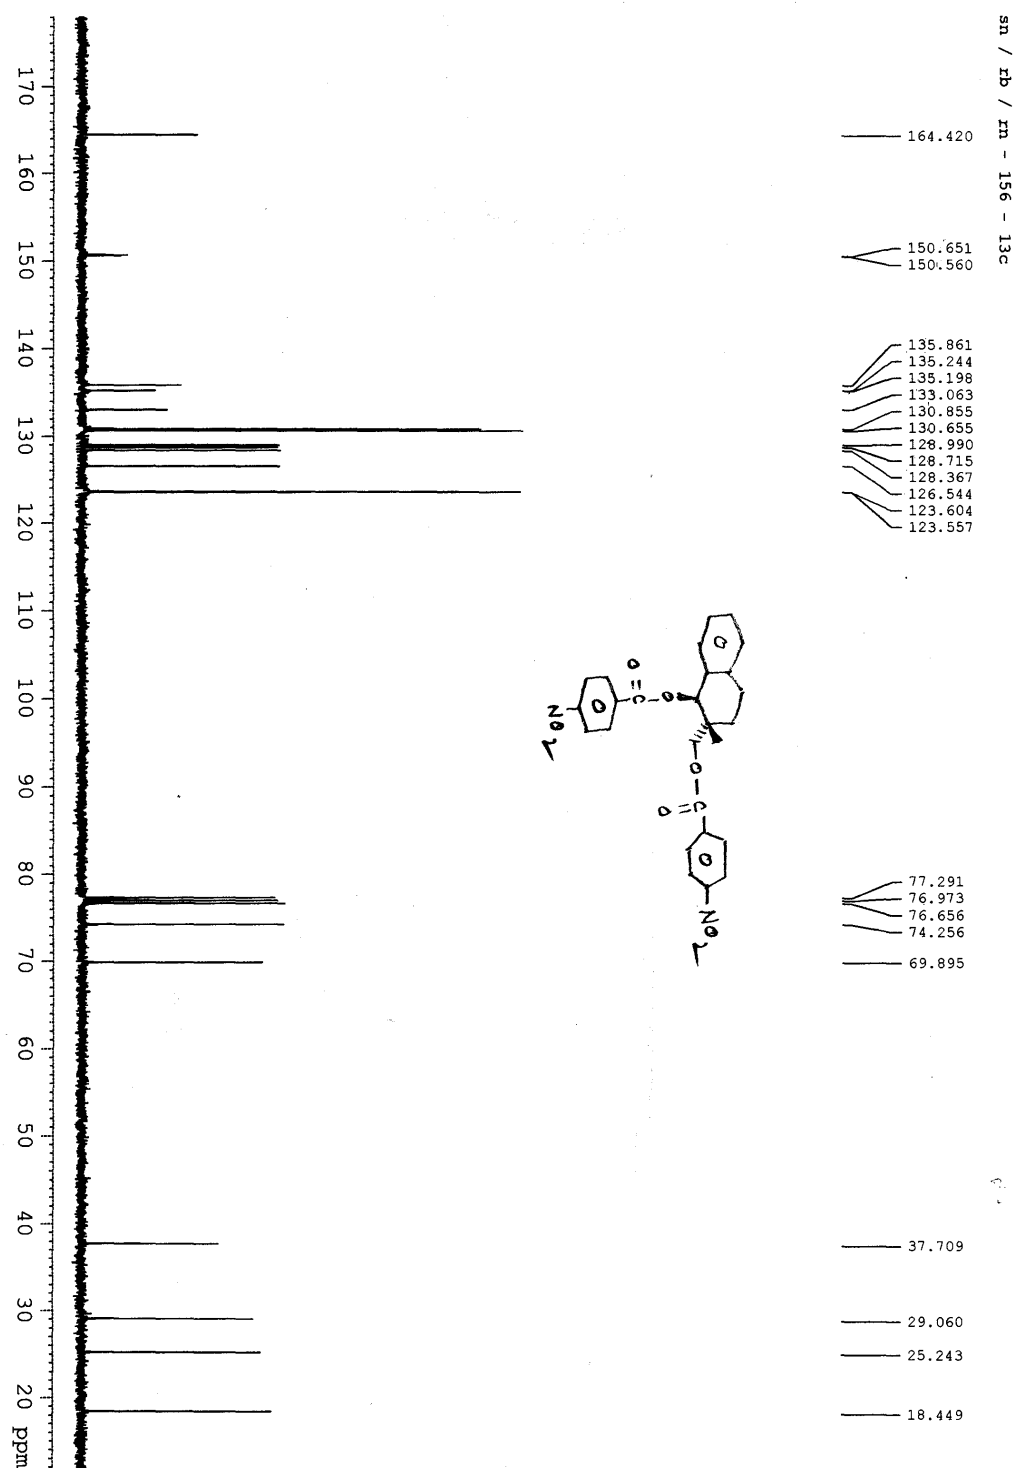



<sup>1</sup>H NMR of compound 45

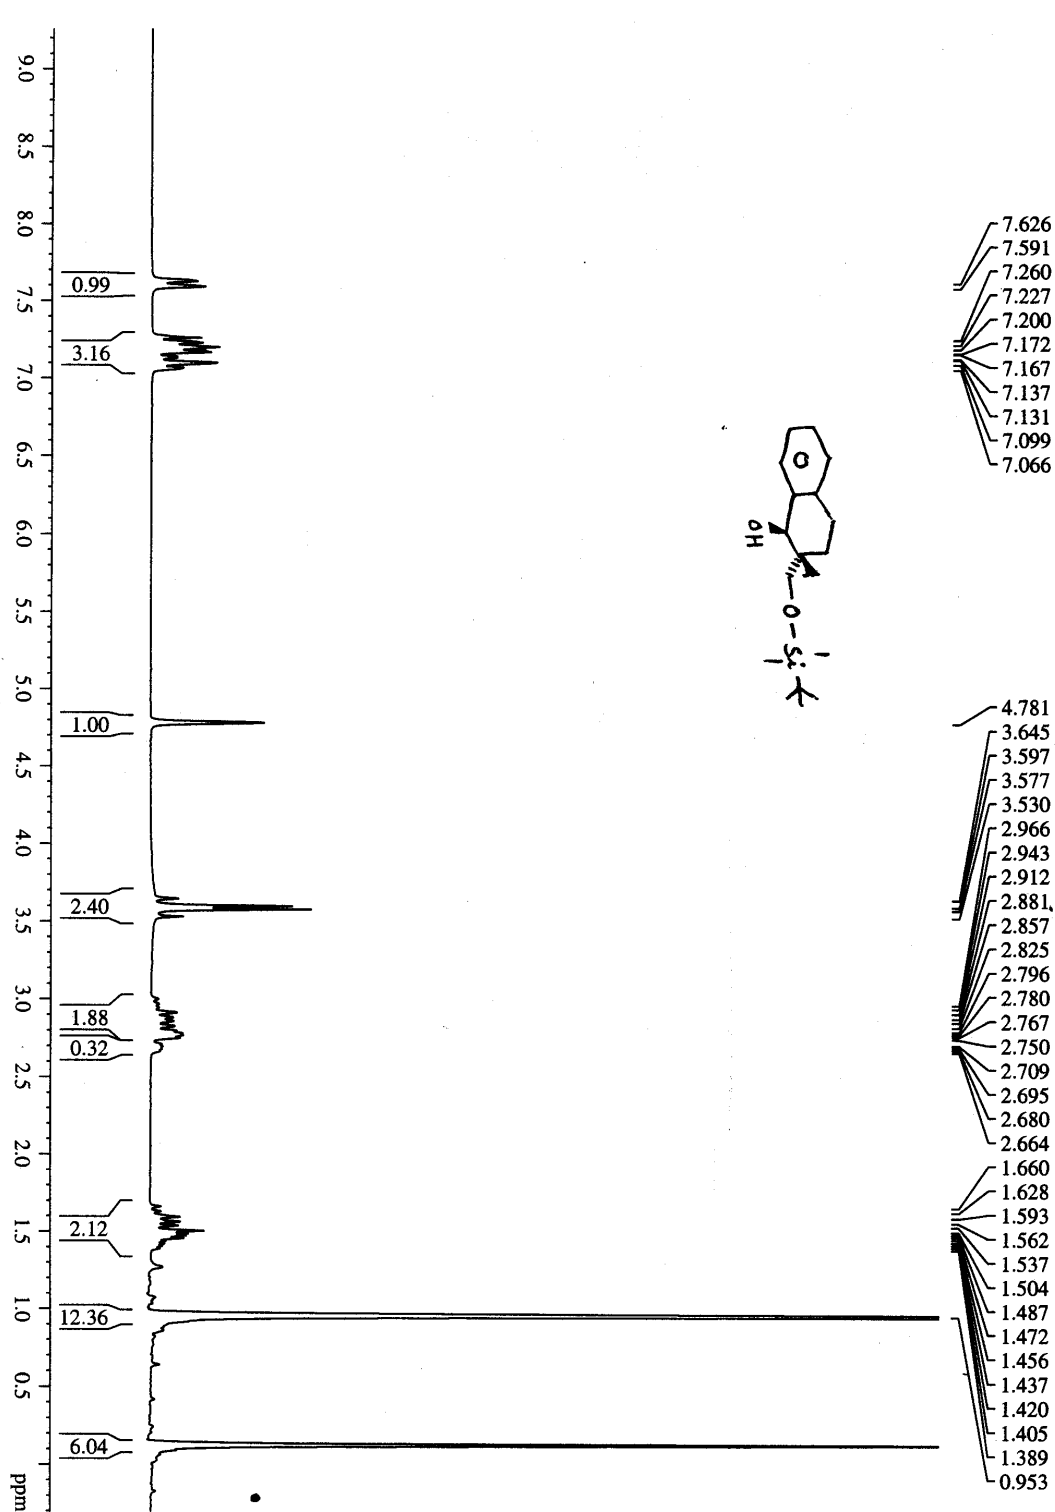

# <sup>13</sup>C NMR of compound 45

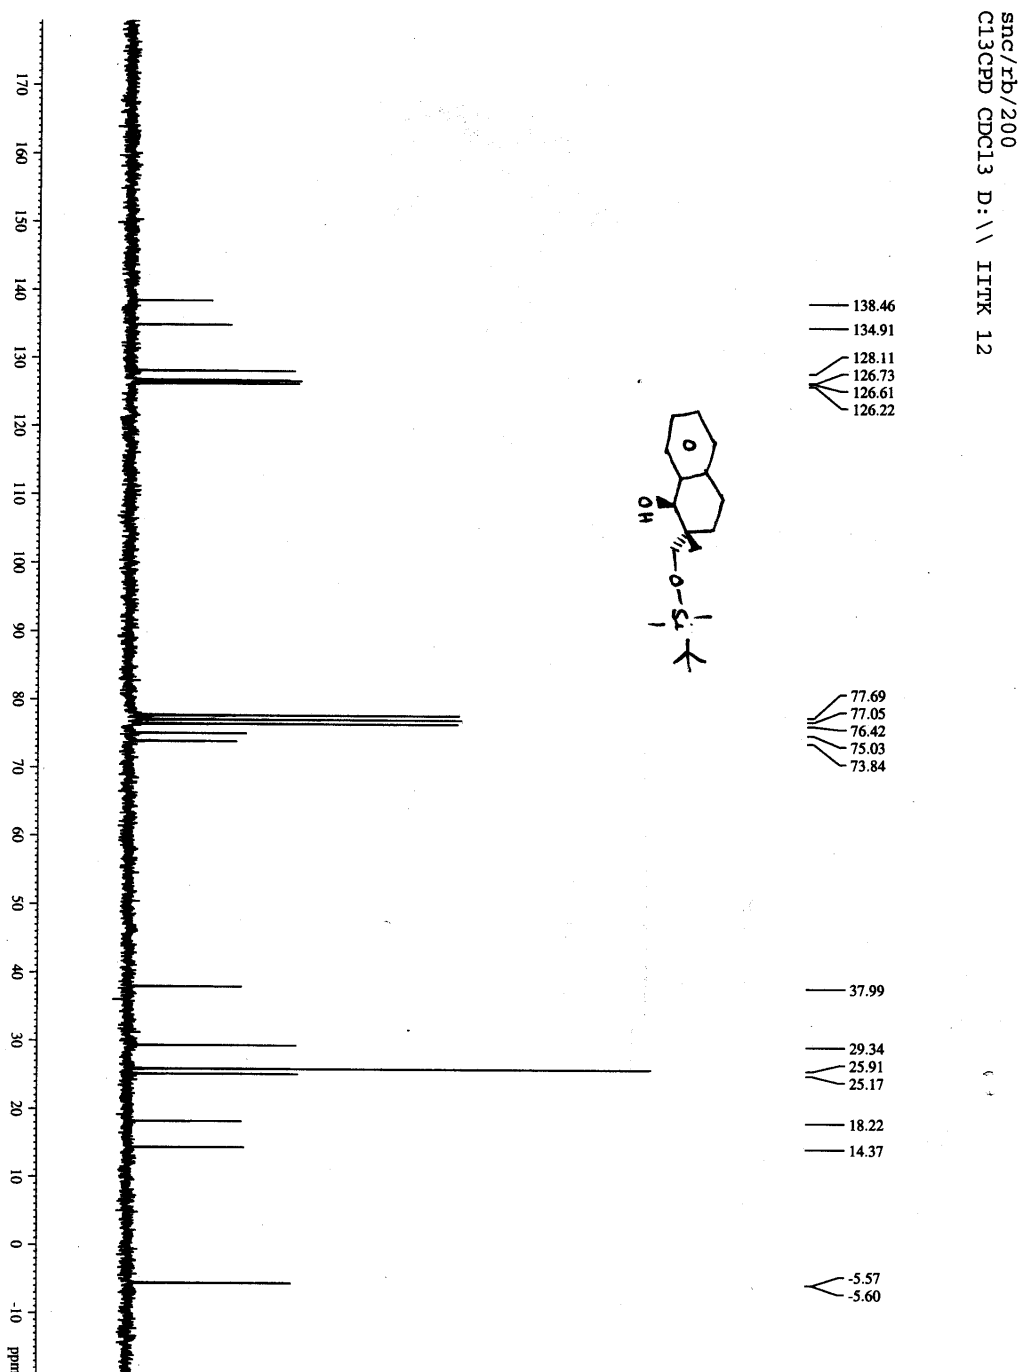

<sup>1</sup>H NMR of compound 46

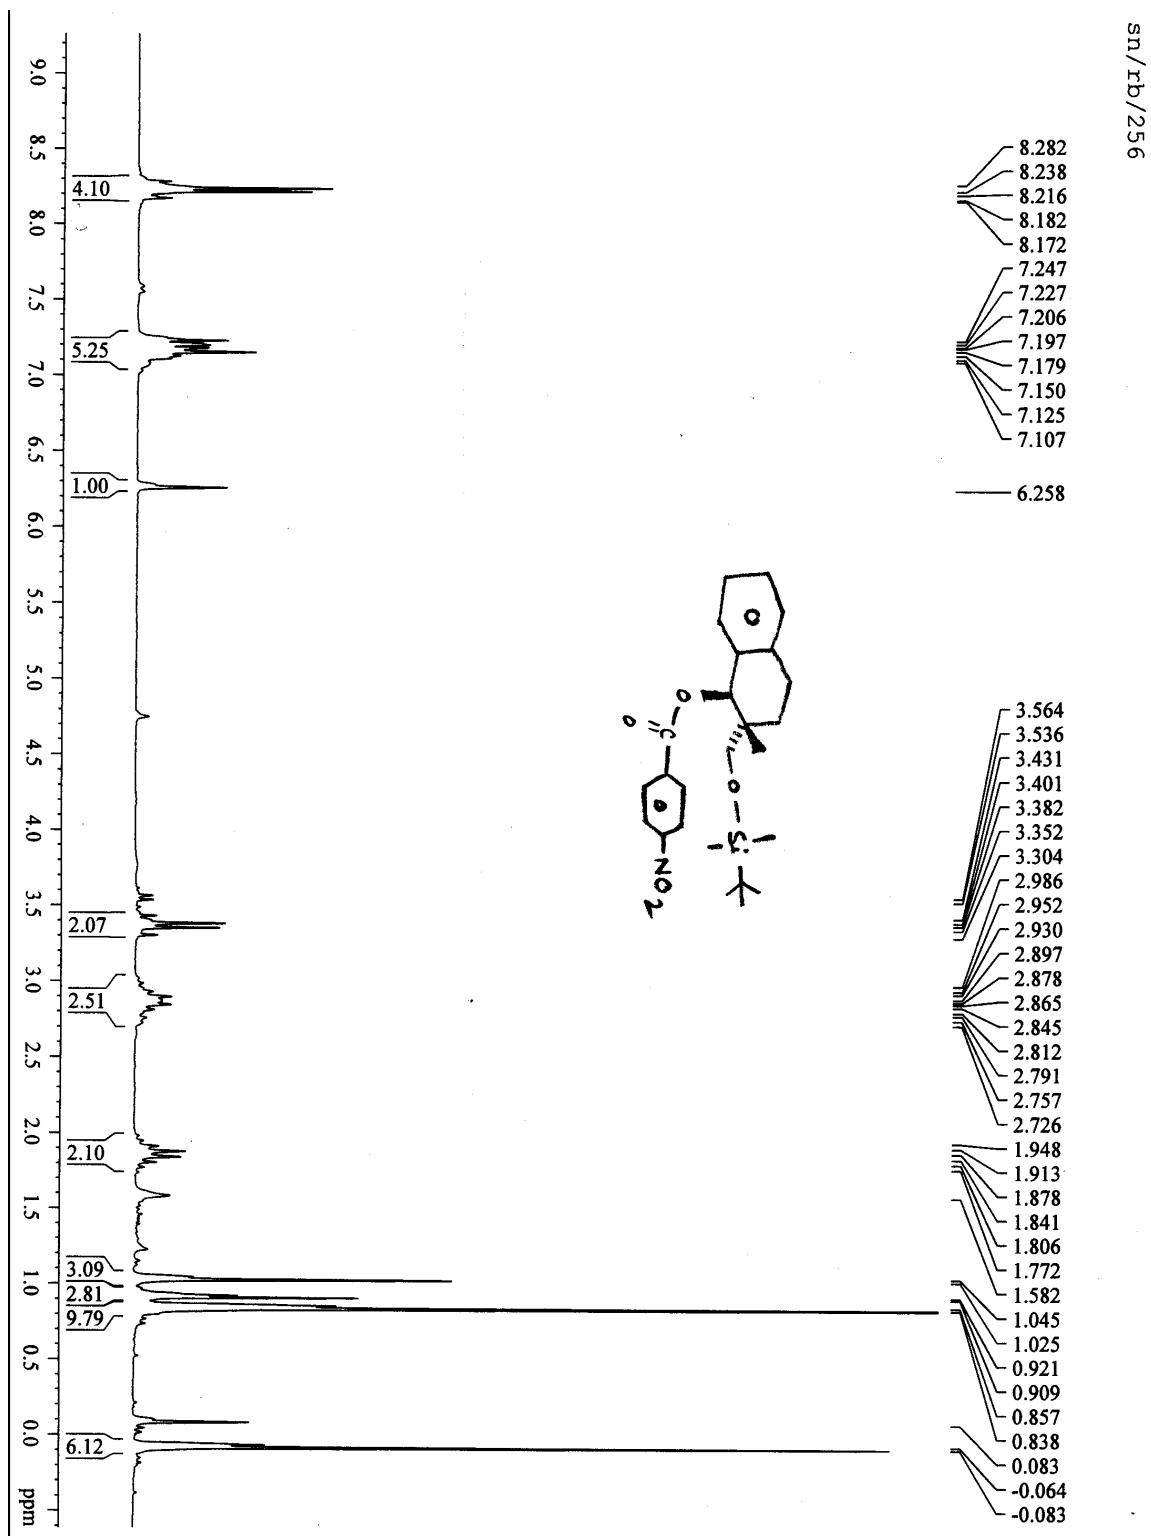

# <sup>13</sup>C NMR of compound 46

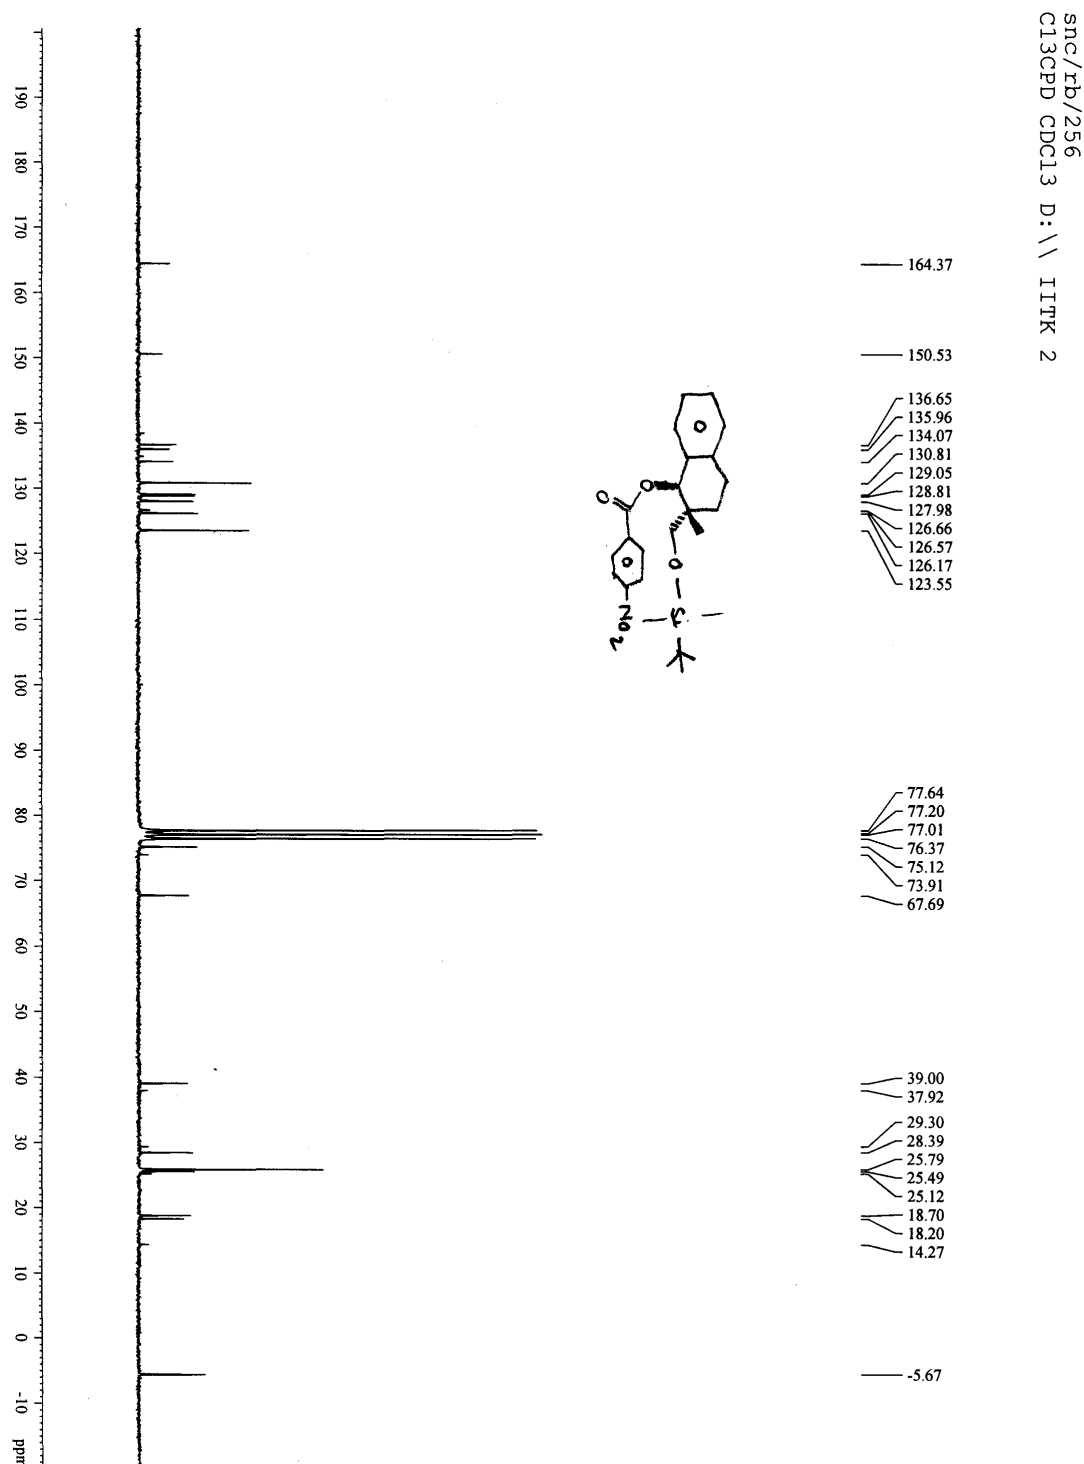

<sup>1</sup>H NMR of compound 47

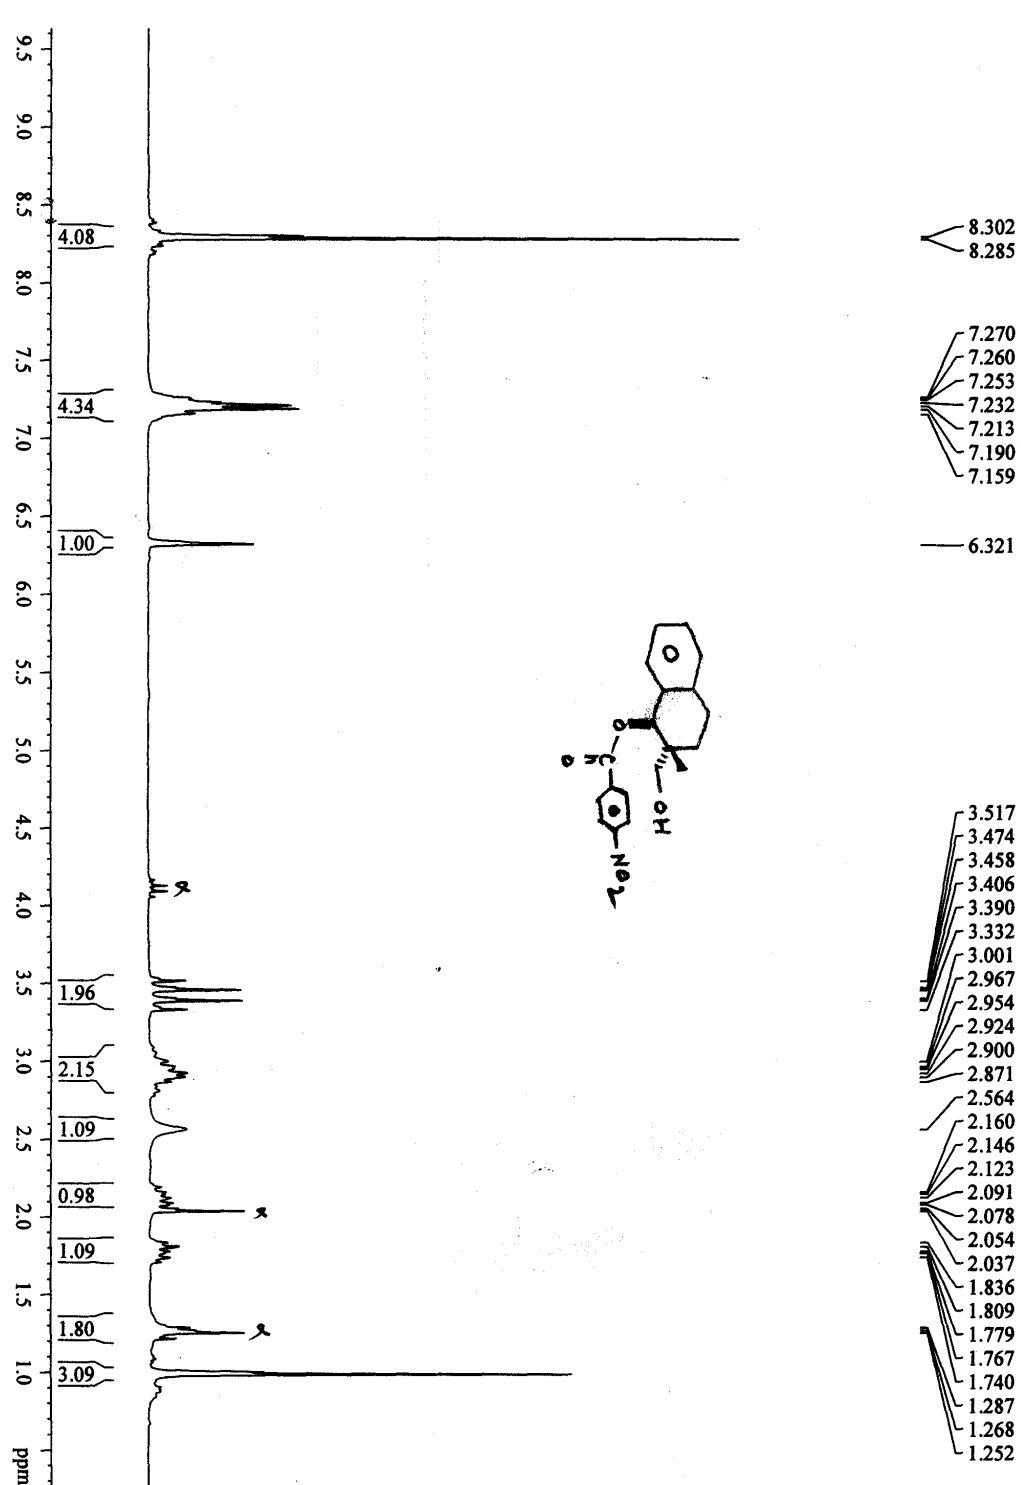

sn/rb/262b

# <sup>13</sup>C NMR of compound 47

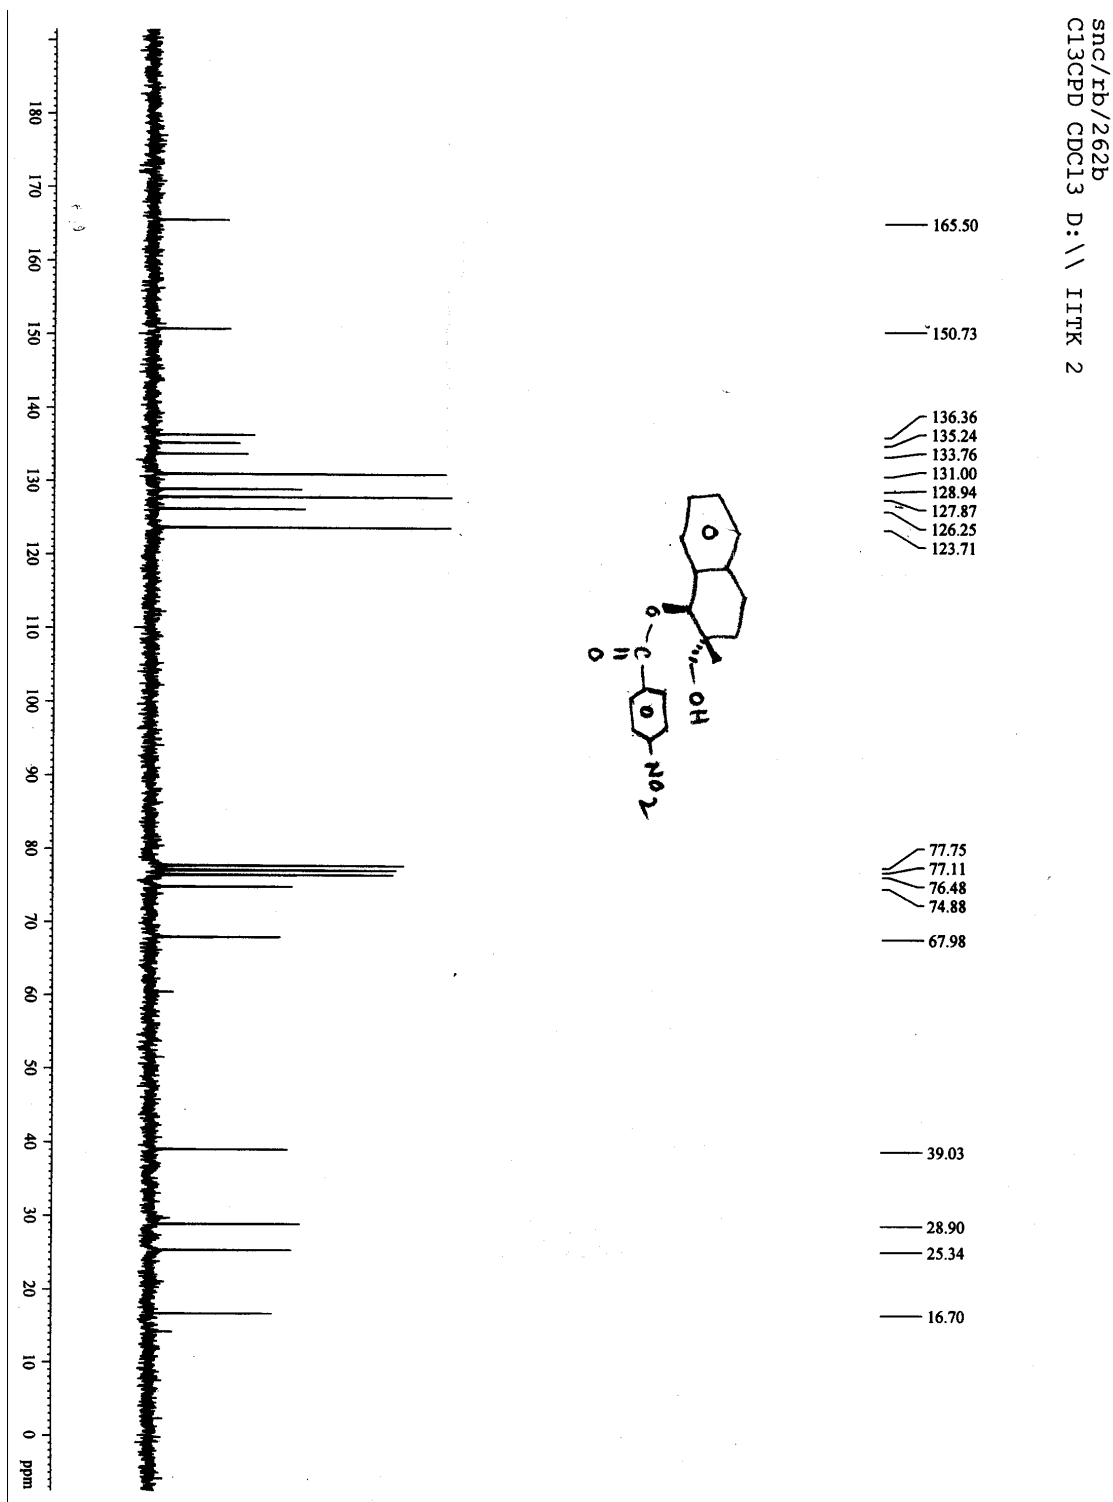

# <sup>1</sup>H NMR of compound 48

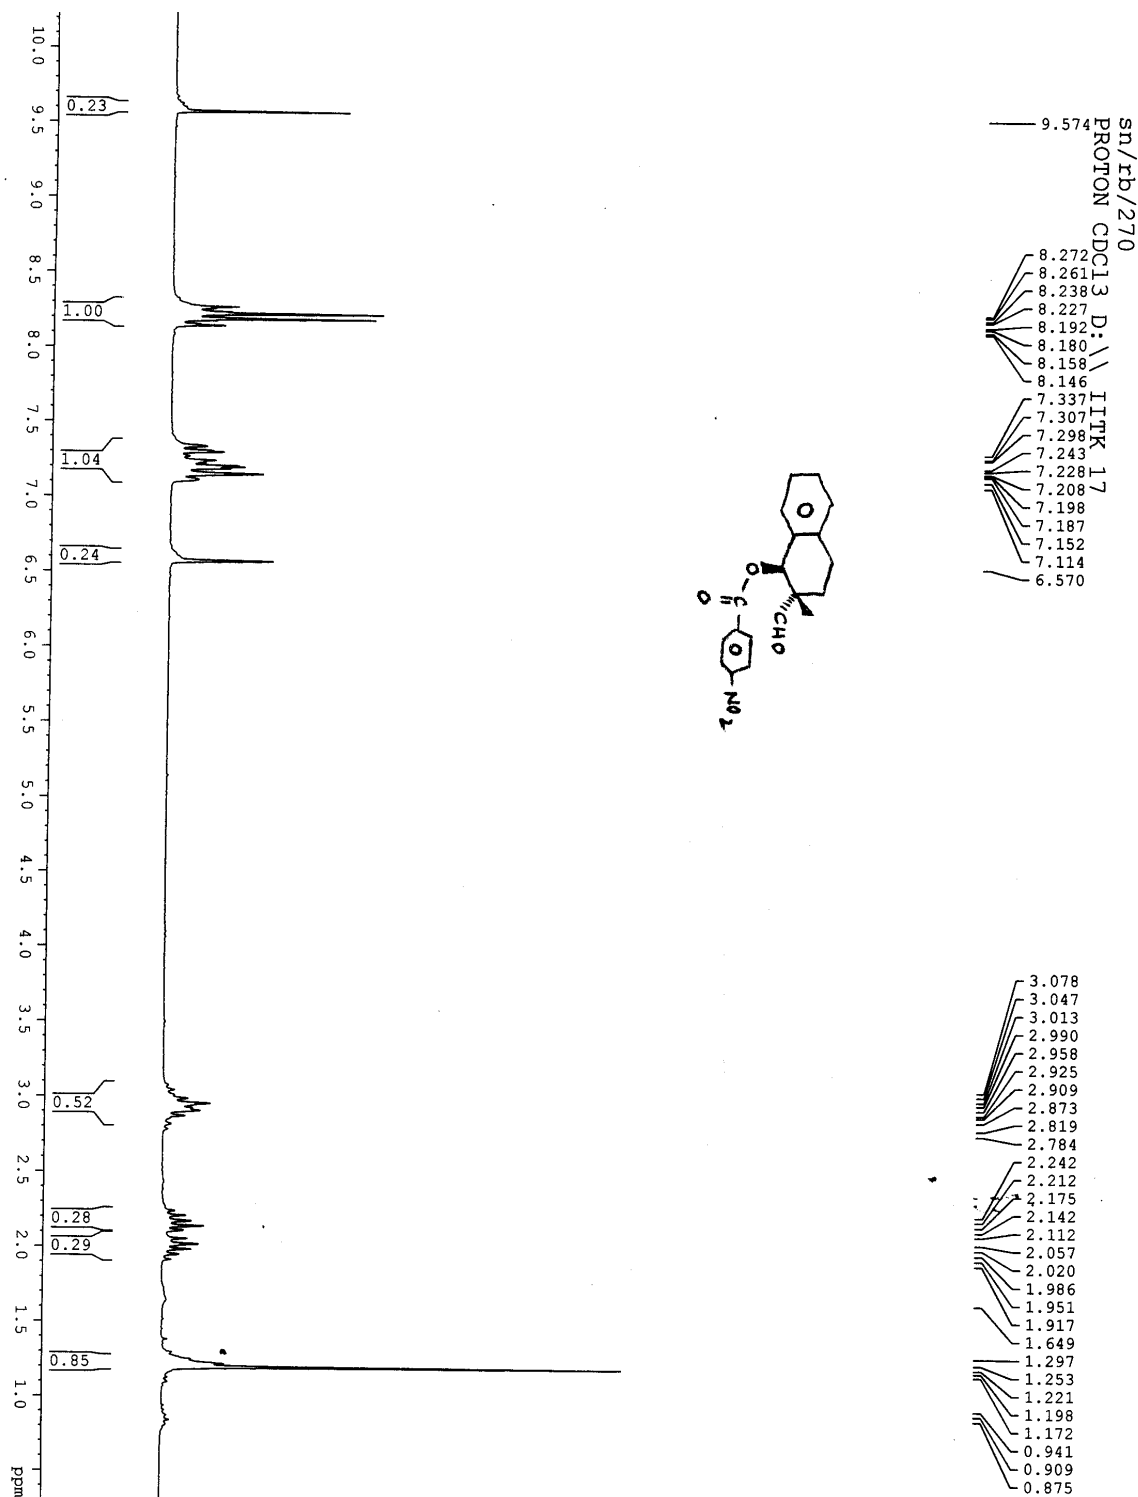

# <sup>13</sup>C NMR of compound 48

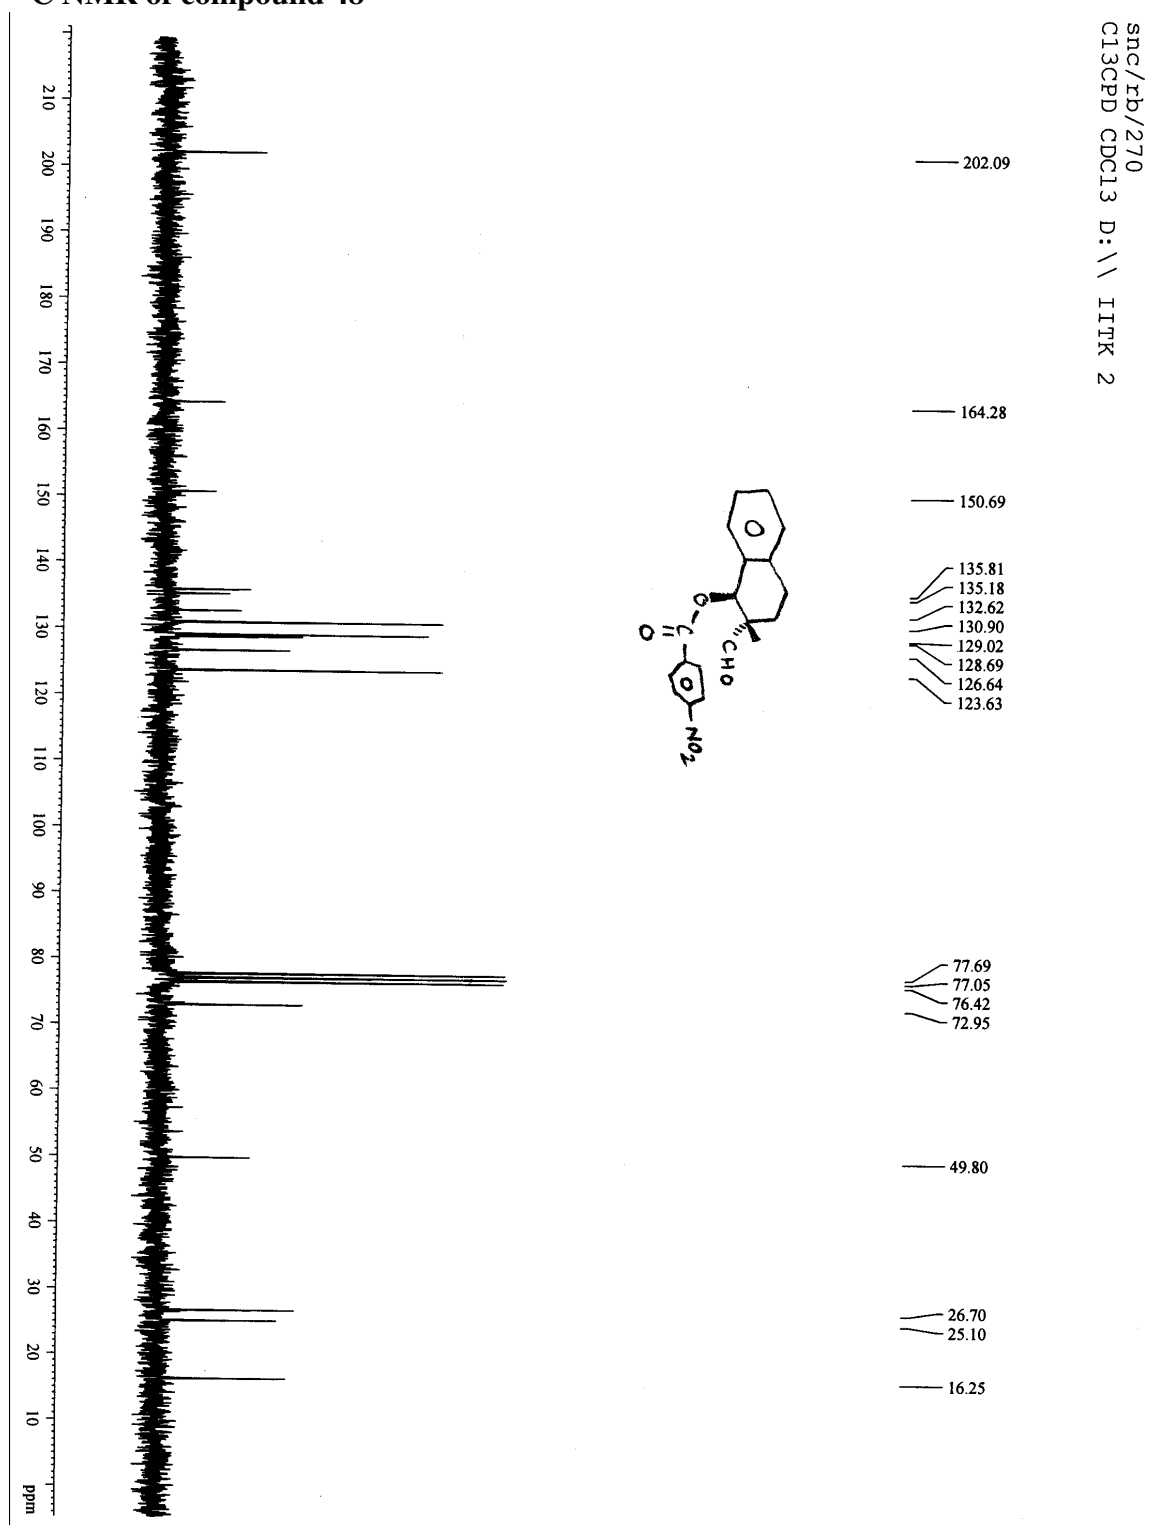



# <sup>1</sup>H NMR of compound 49

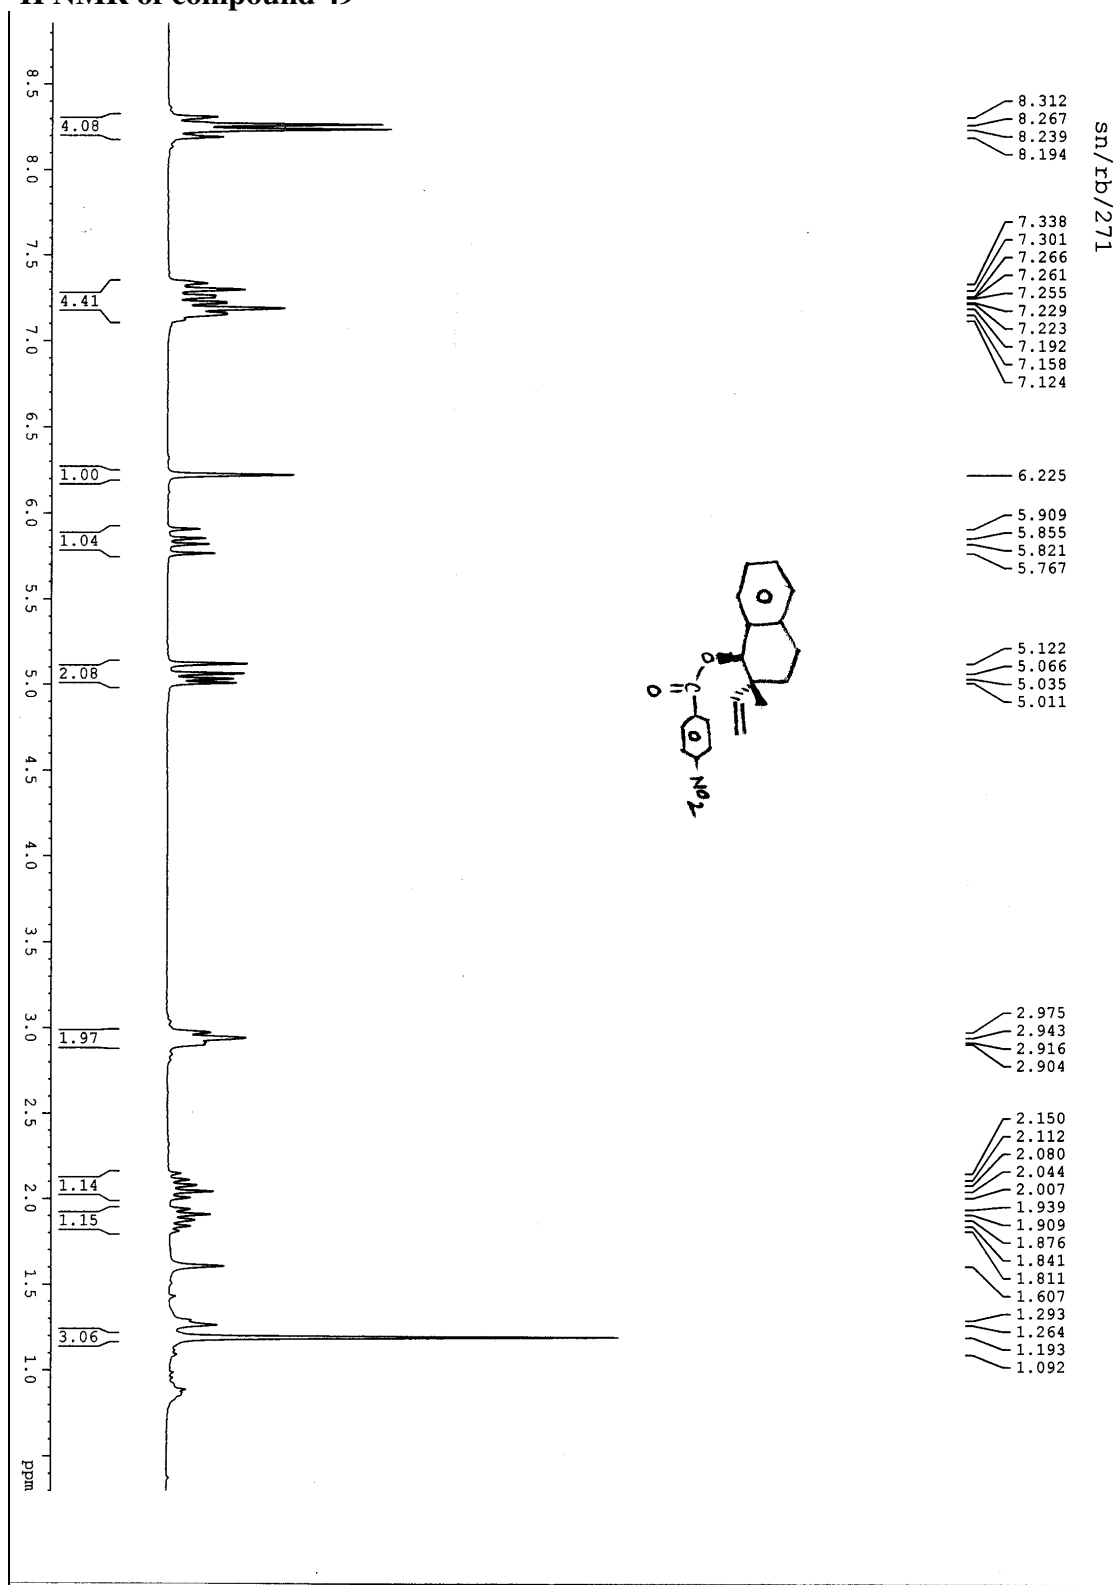

# <sup>13</sup>C NMR of compound 49

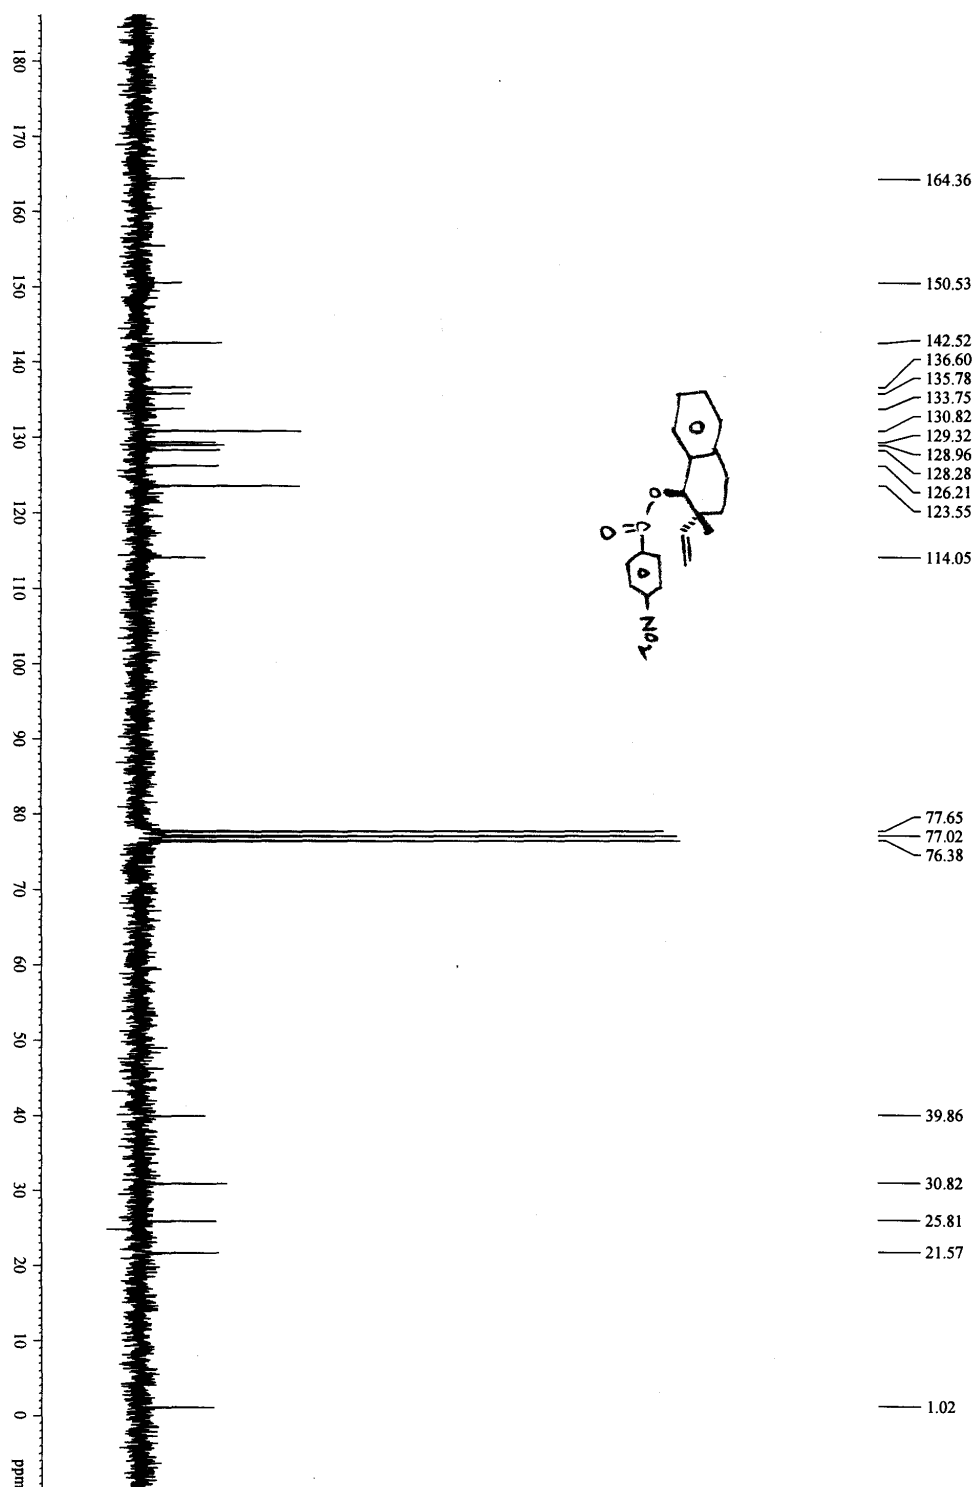

snc/rb/271  
C13CPD CDCl3 D:\ IITK 2

**<sup>1</sup>H NMR of compound 50**

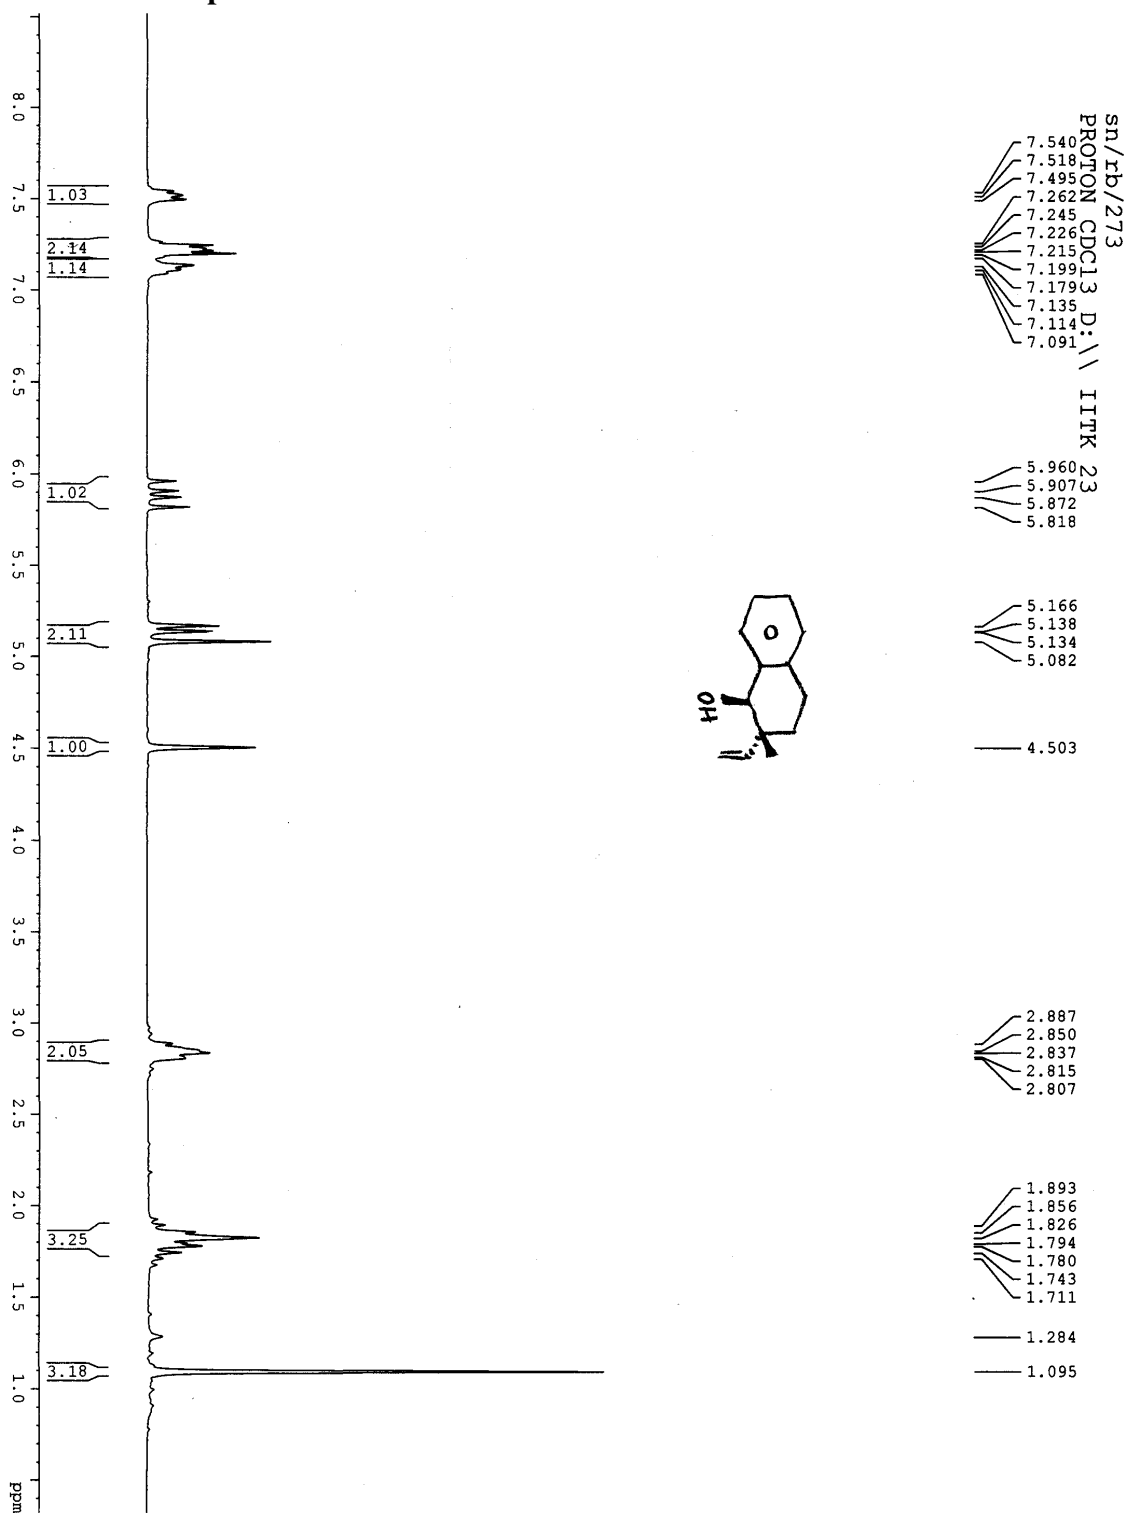

# <sup>13</sup>C NMR of compound 50

snc/rb/273  
C13CPD CDC13 D:\ IITK 2

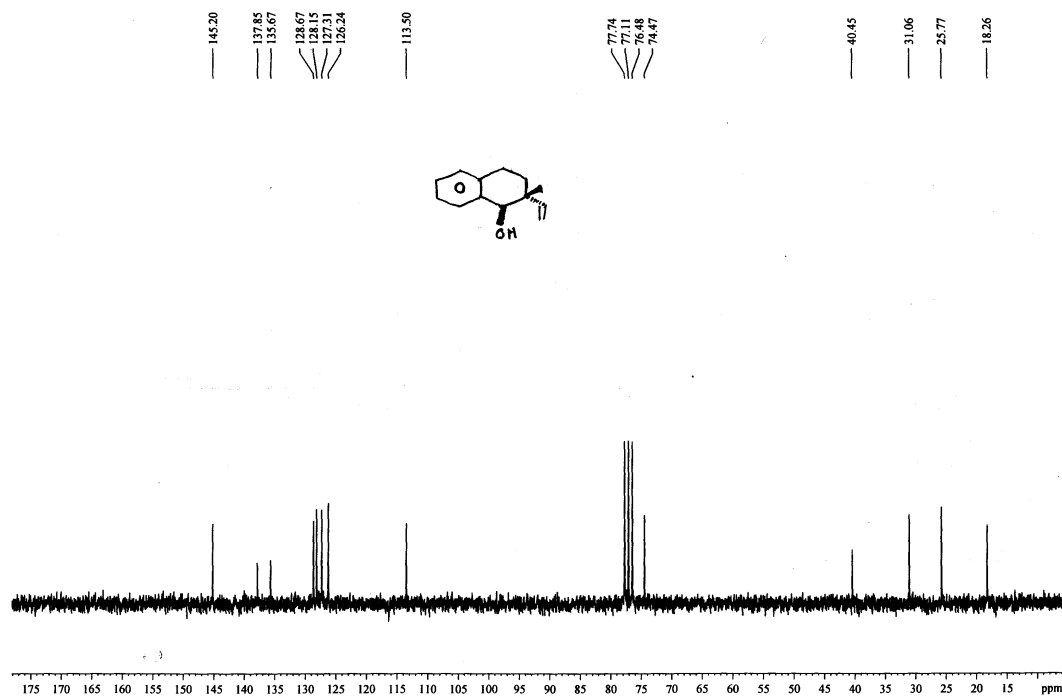

# DEPT 135 of compound 50

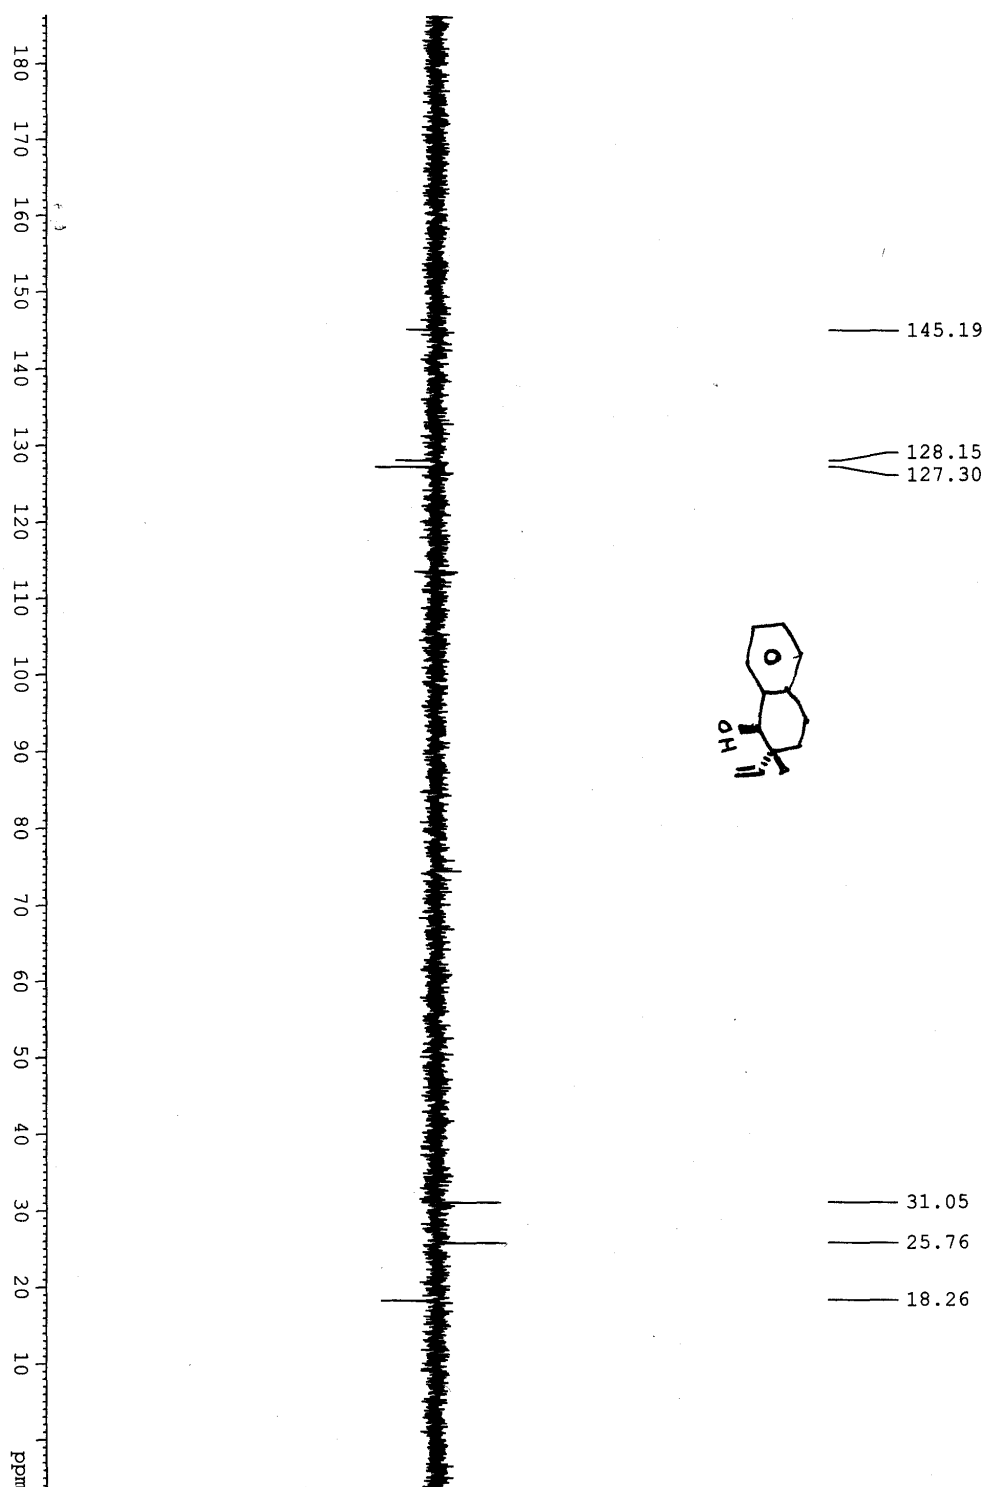

# <sup>1</sup>H NMR of compound 51

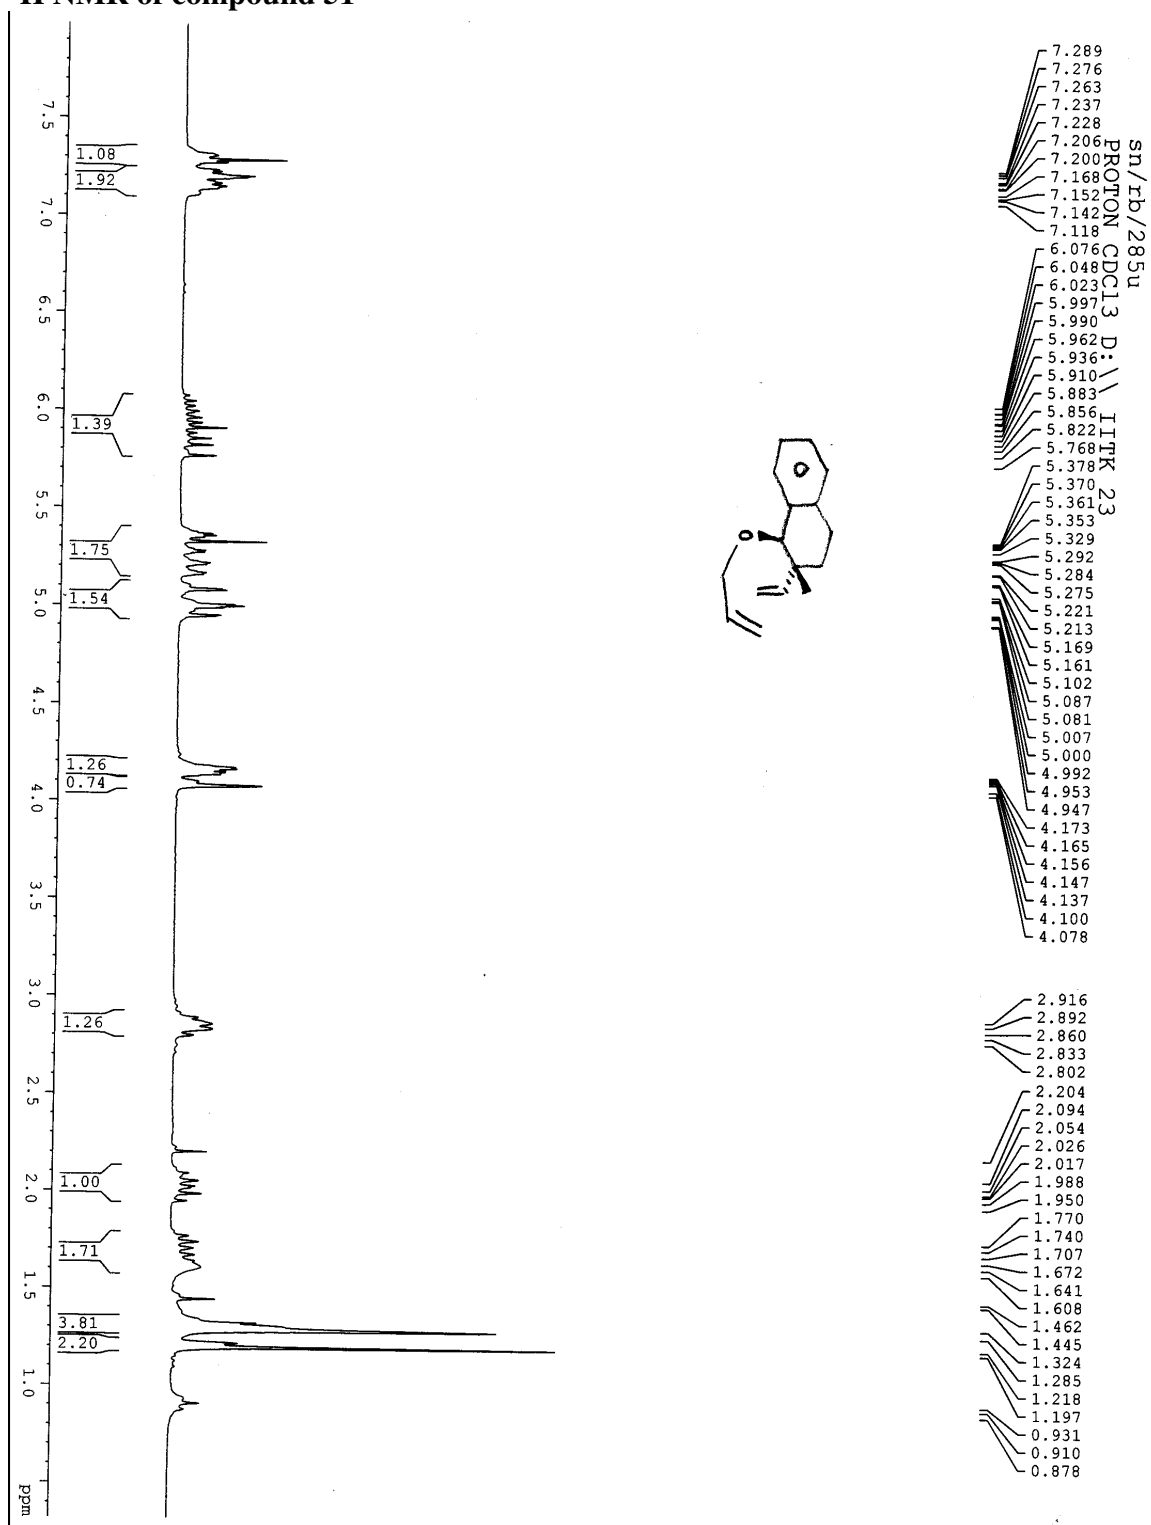

<sup>13</sup>C NMR of compound 51

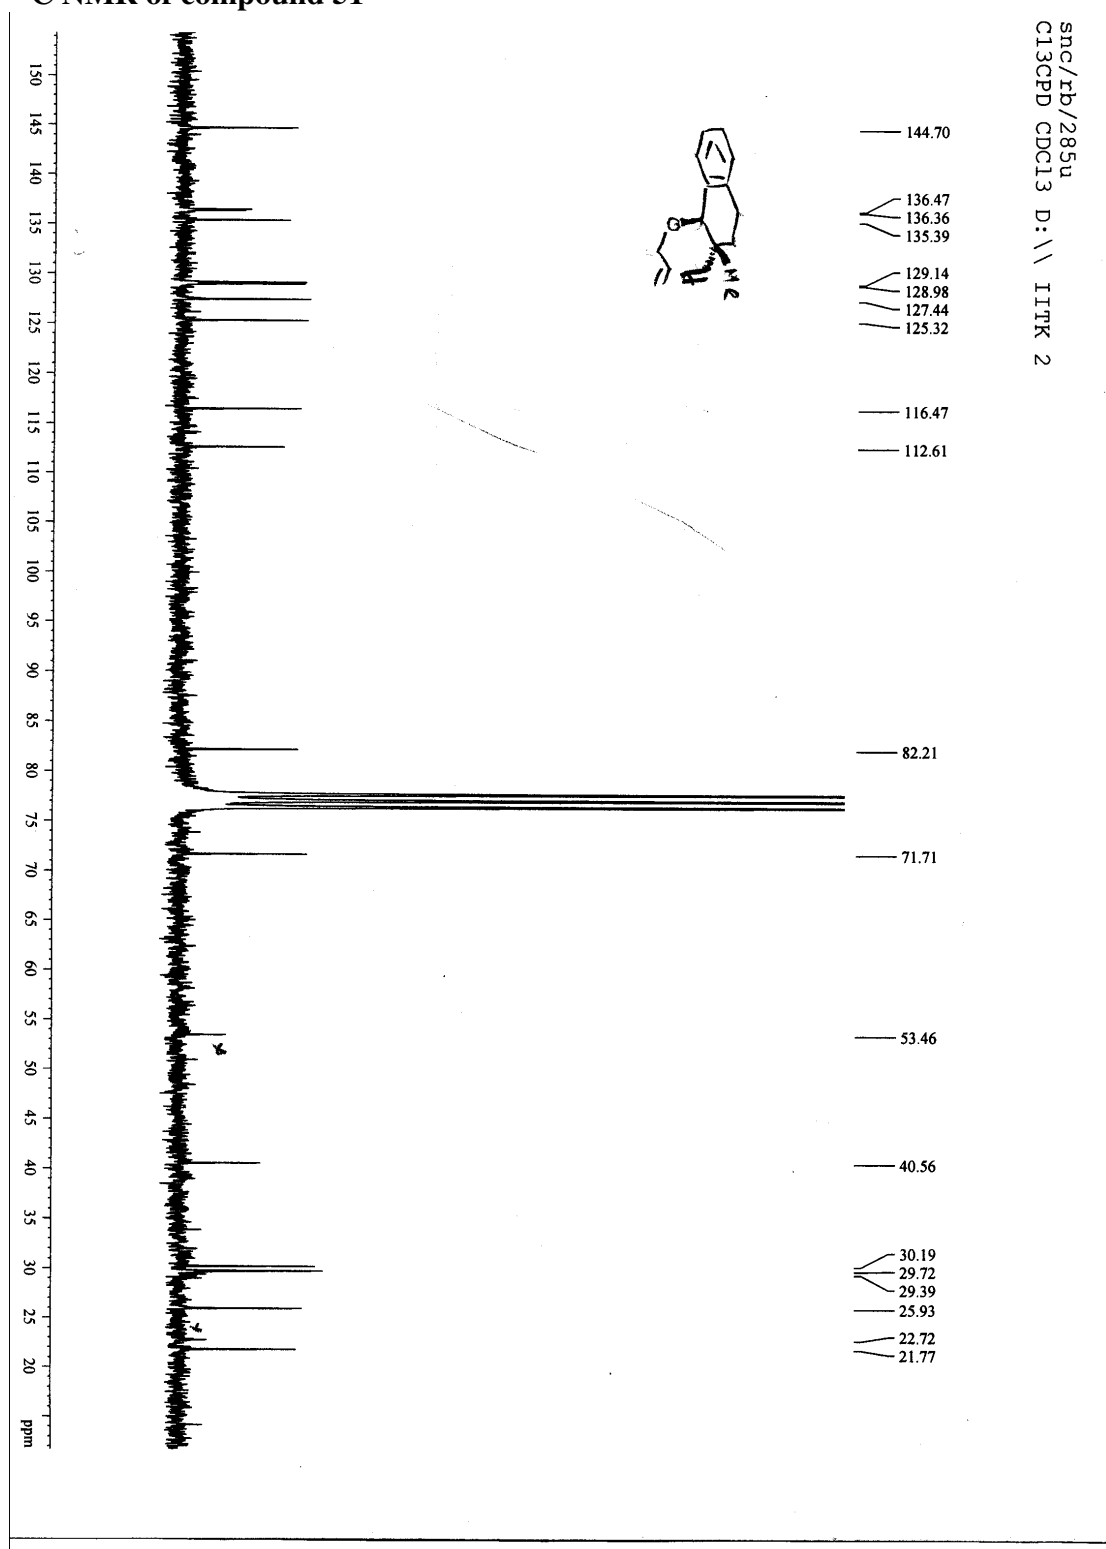

# <sup>13</sup>C NMR of compound 52

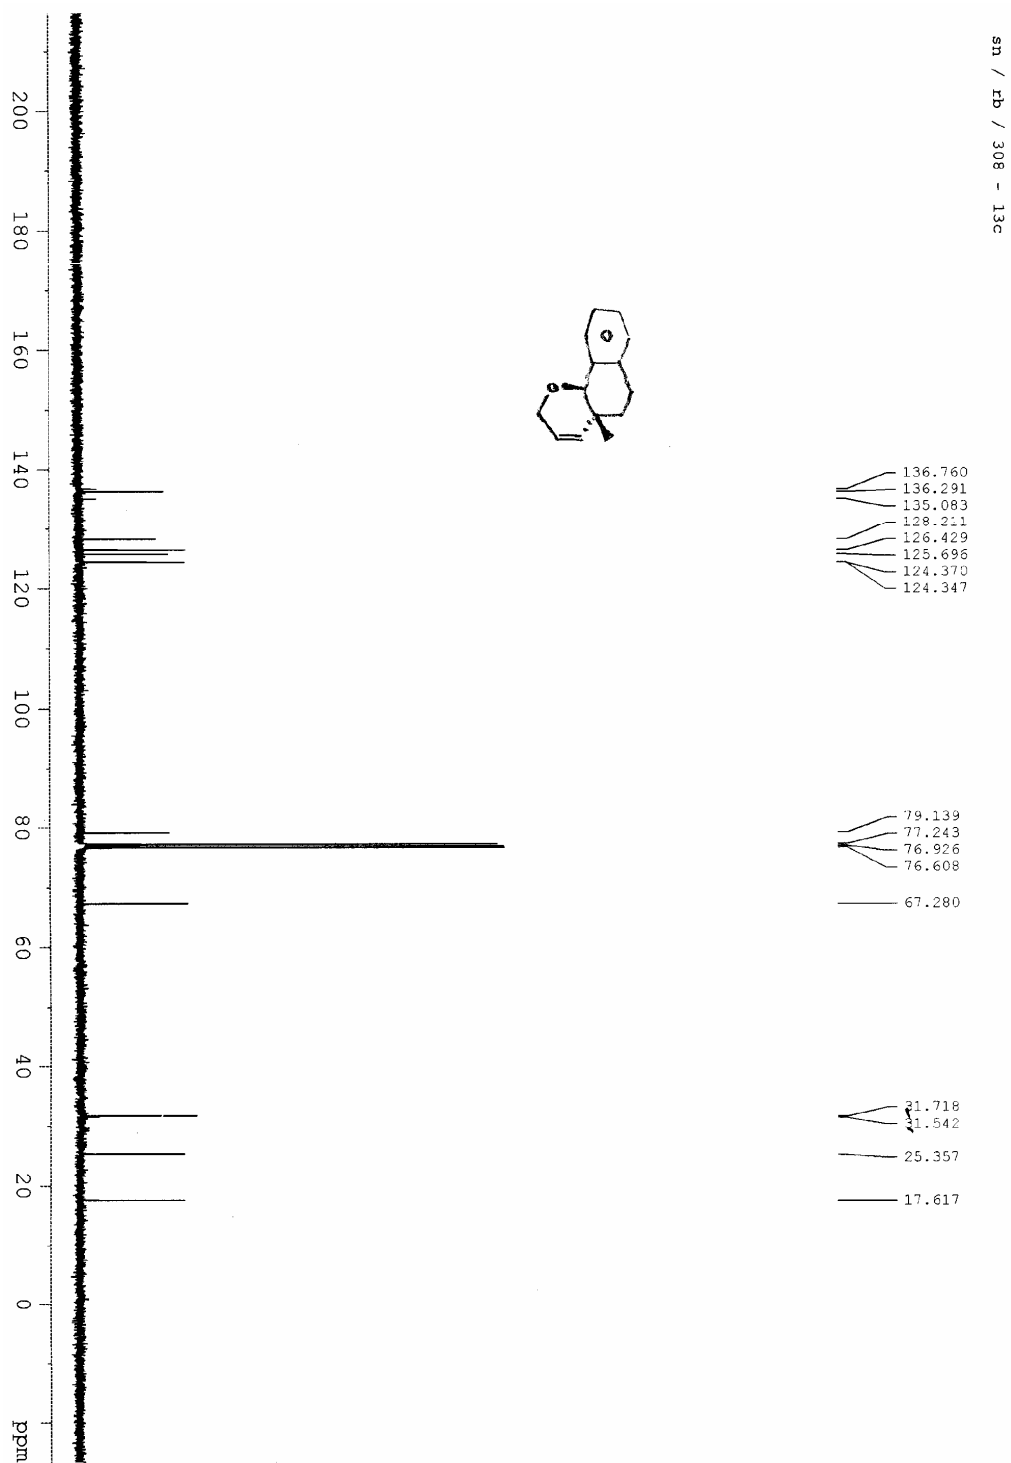



# DEPT 135 NMR of compound 52

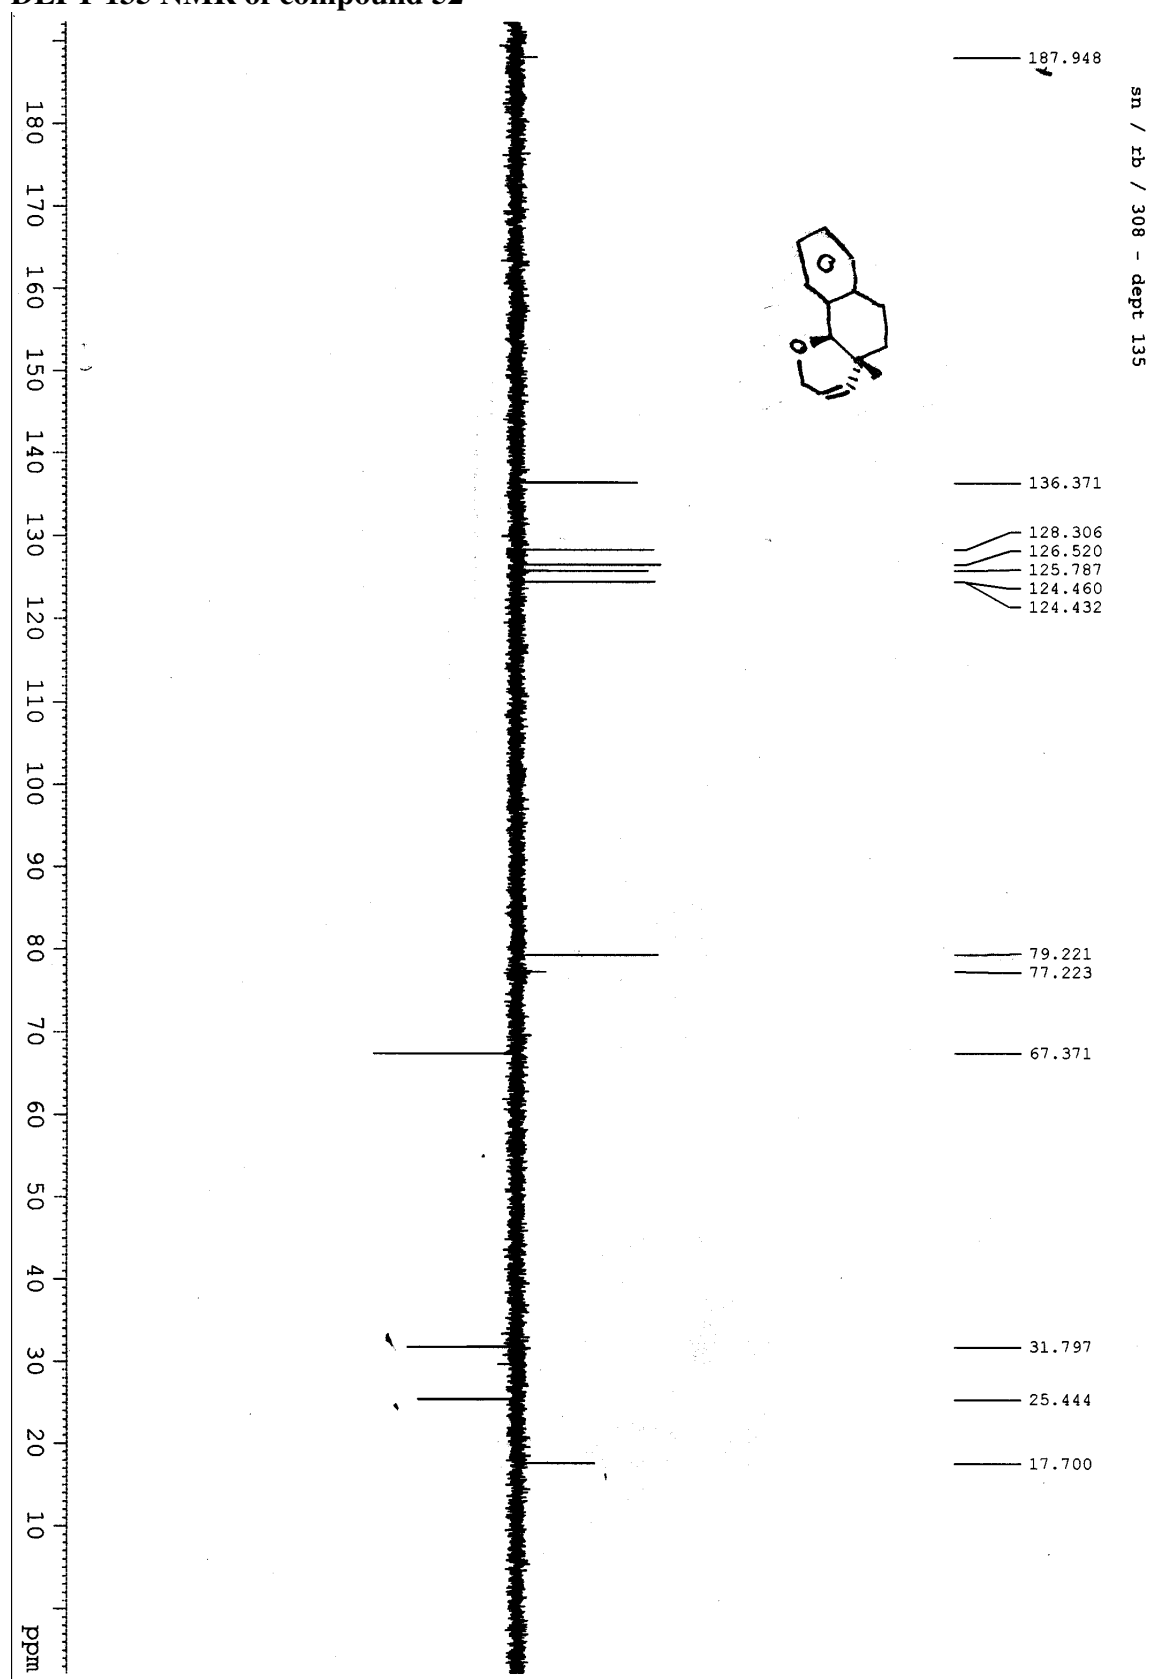

# <sup>1</sup>H NMR of compound 53

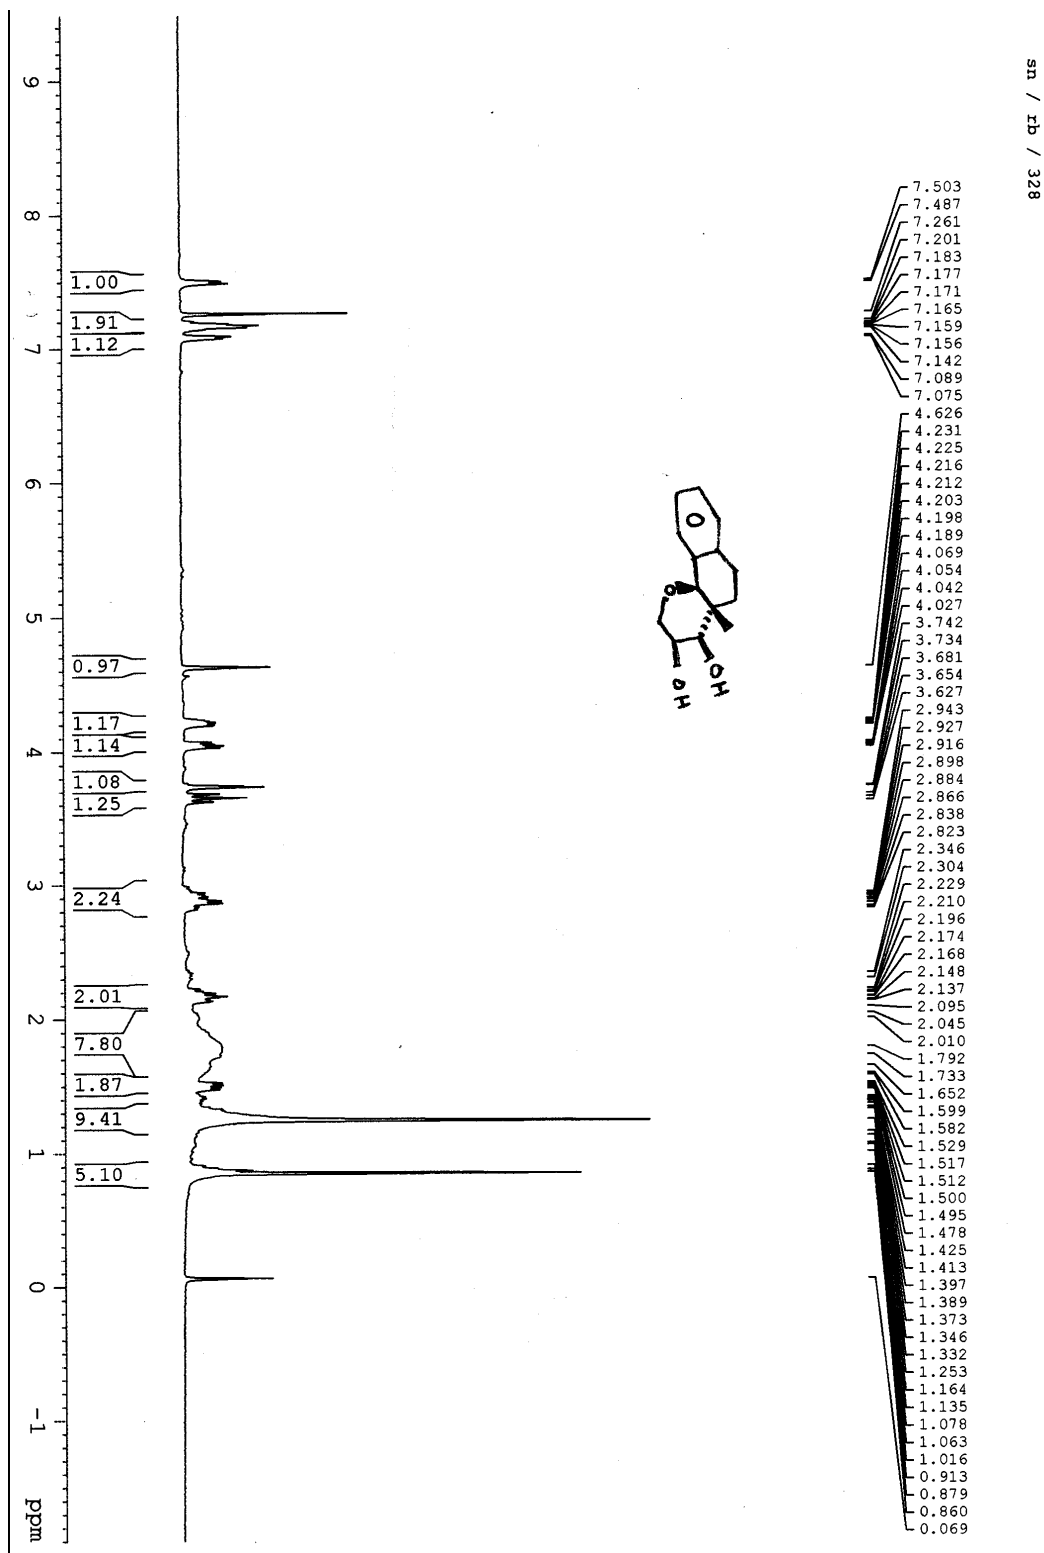

# <sup>13</sup>C NMR of compound 53

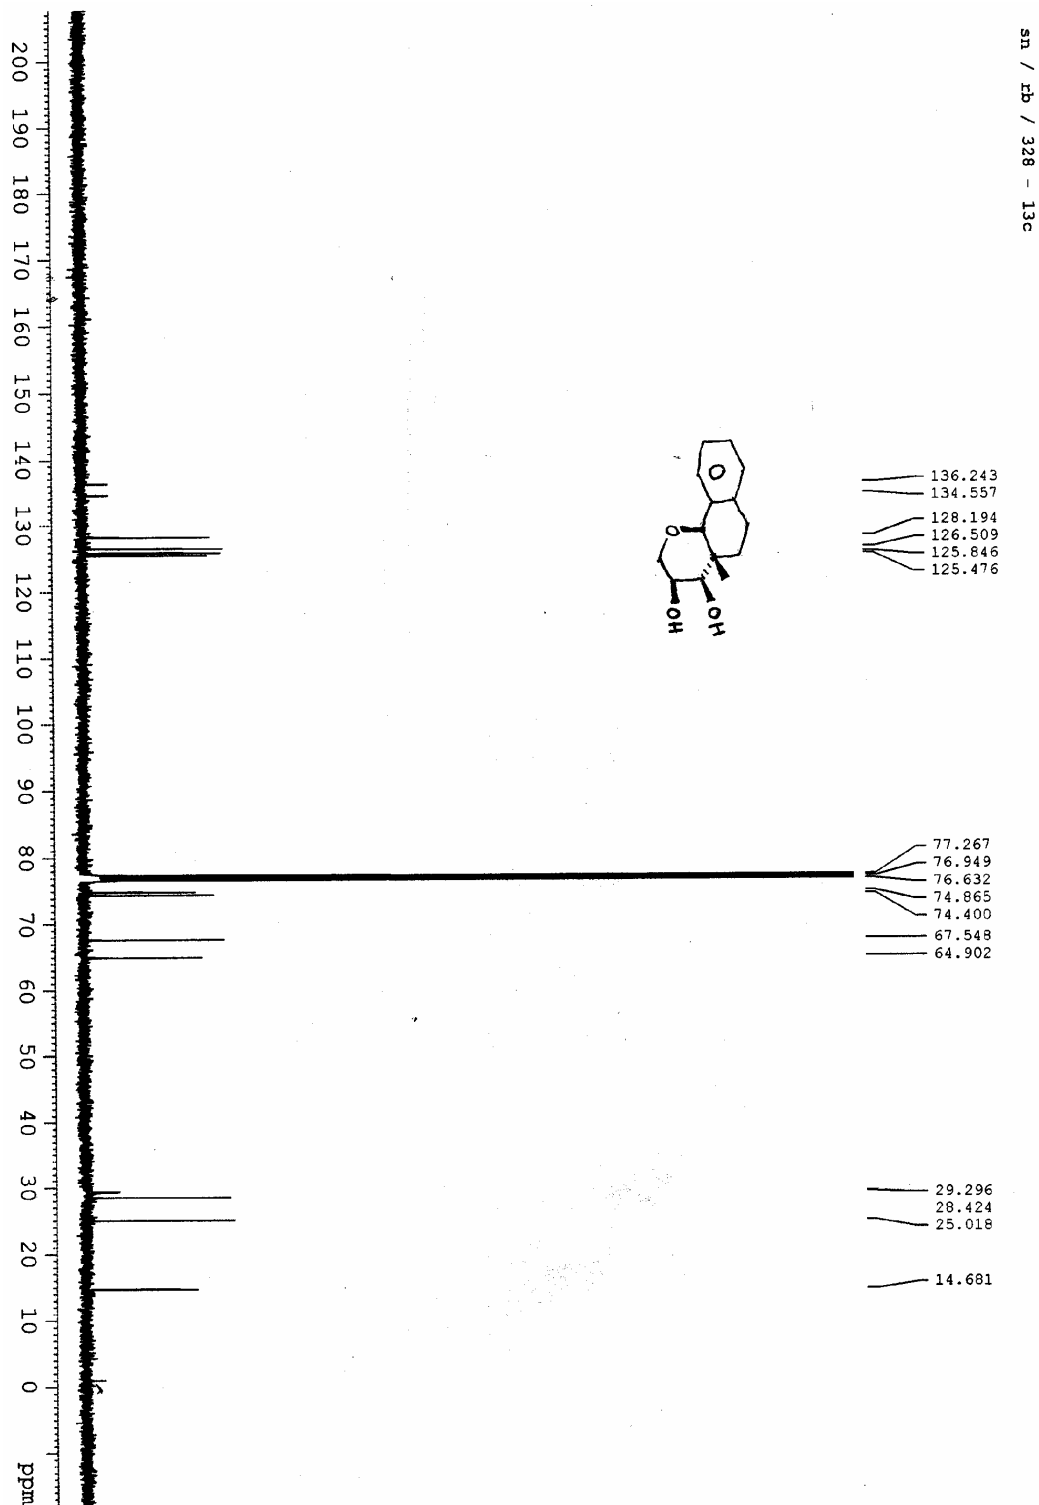

# DEPT 135 of compound 53

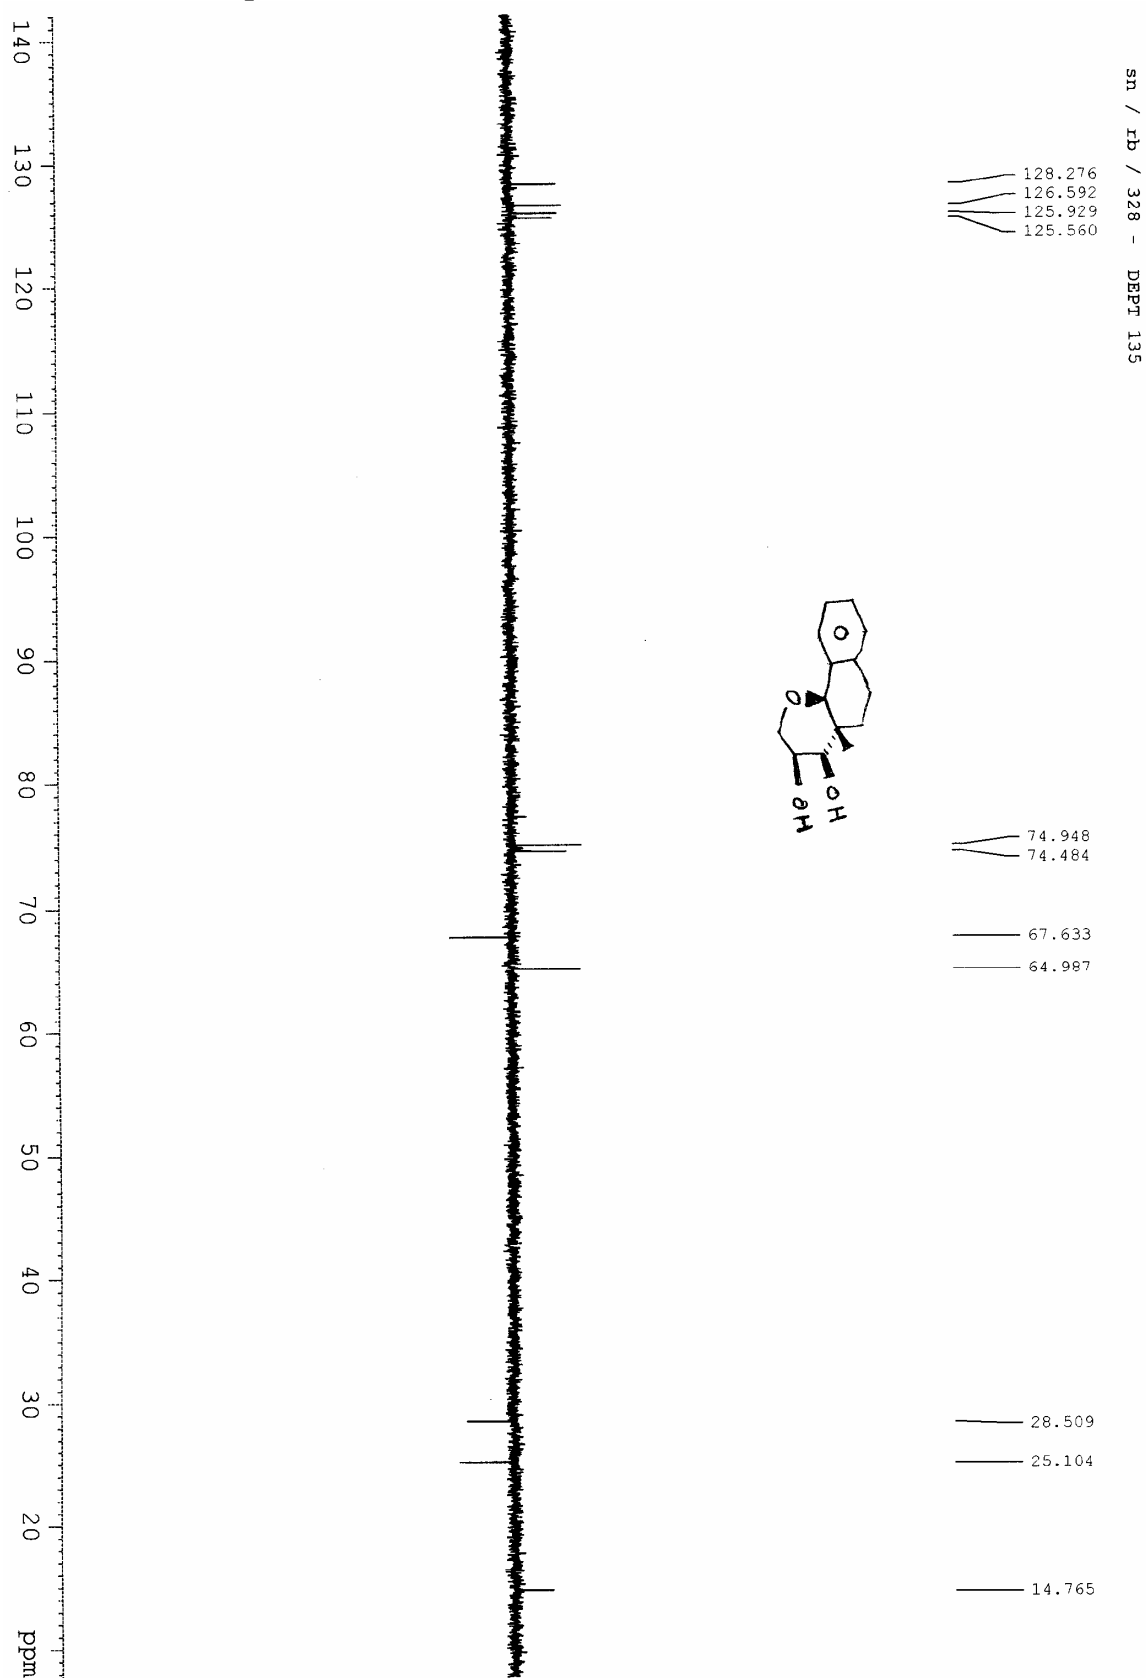



# <sup>13</sup>C NMR of compound 54

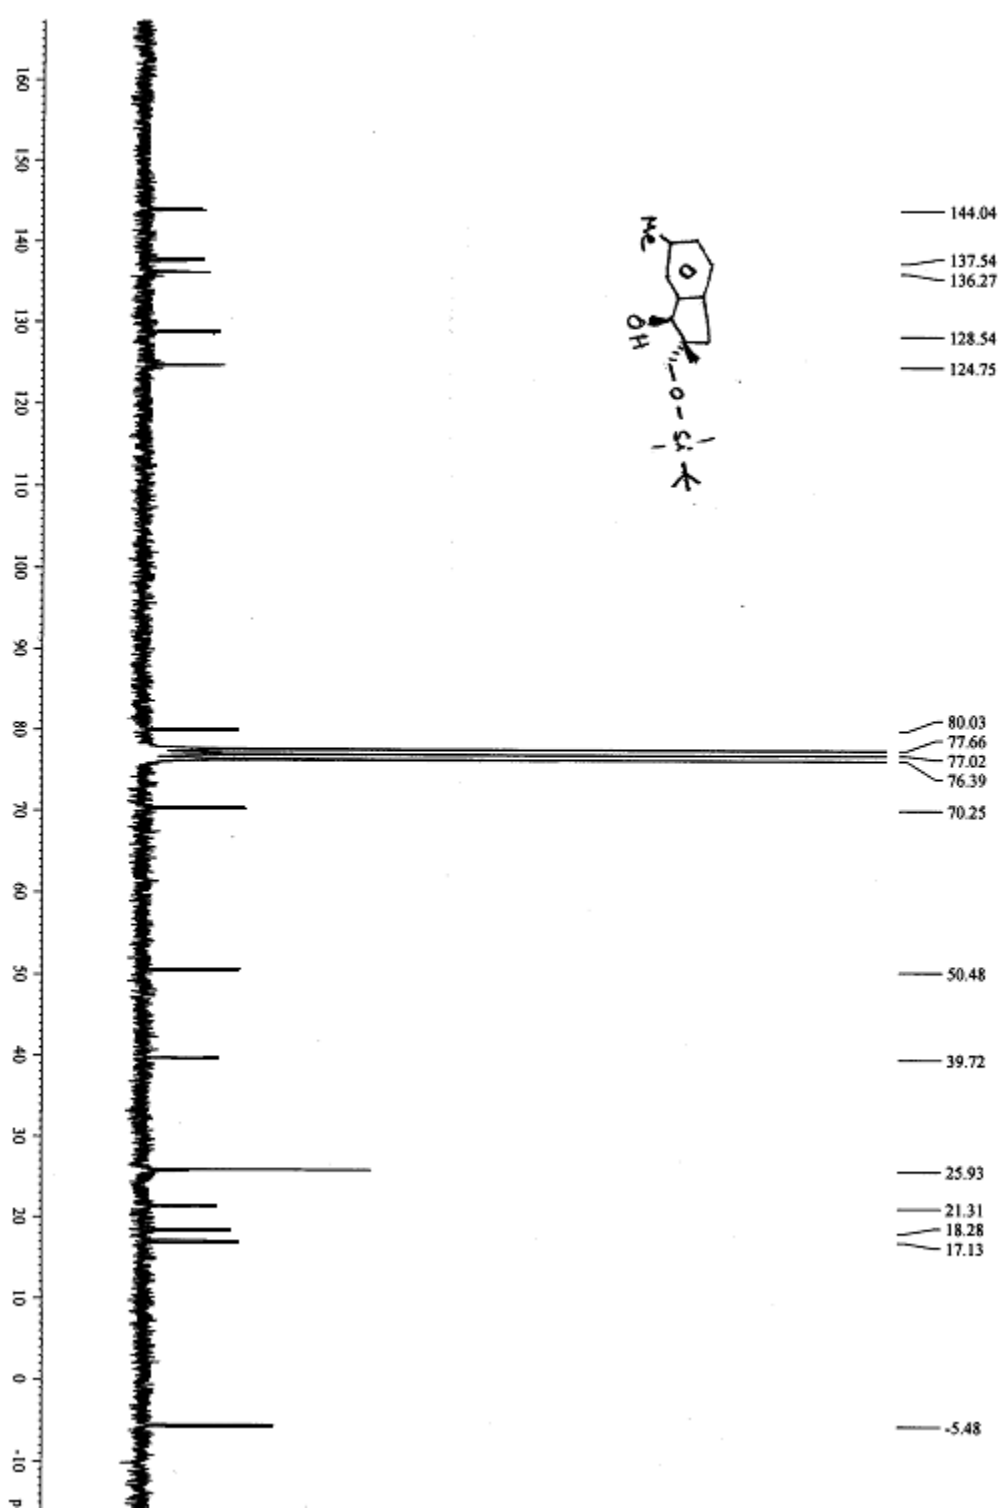

snc/rb/351

**<sup>1</sup>H NMR of compound 55**

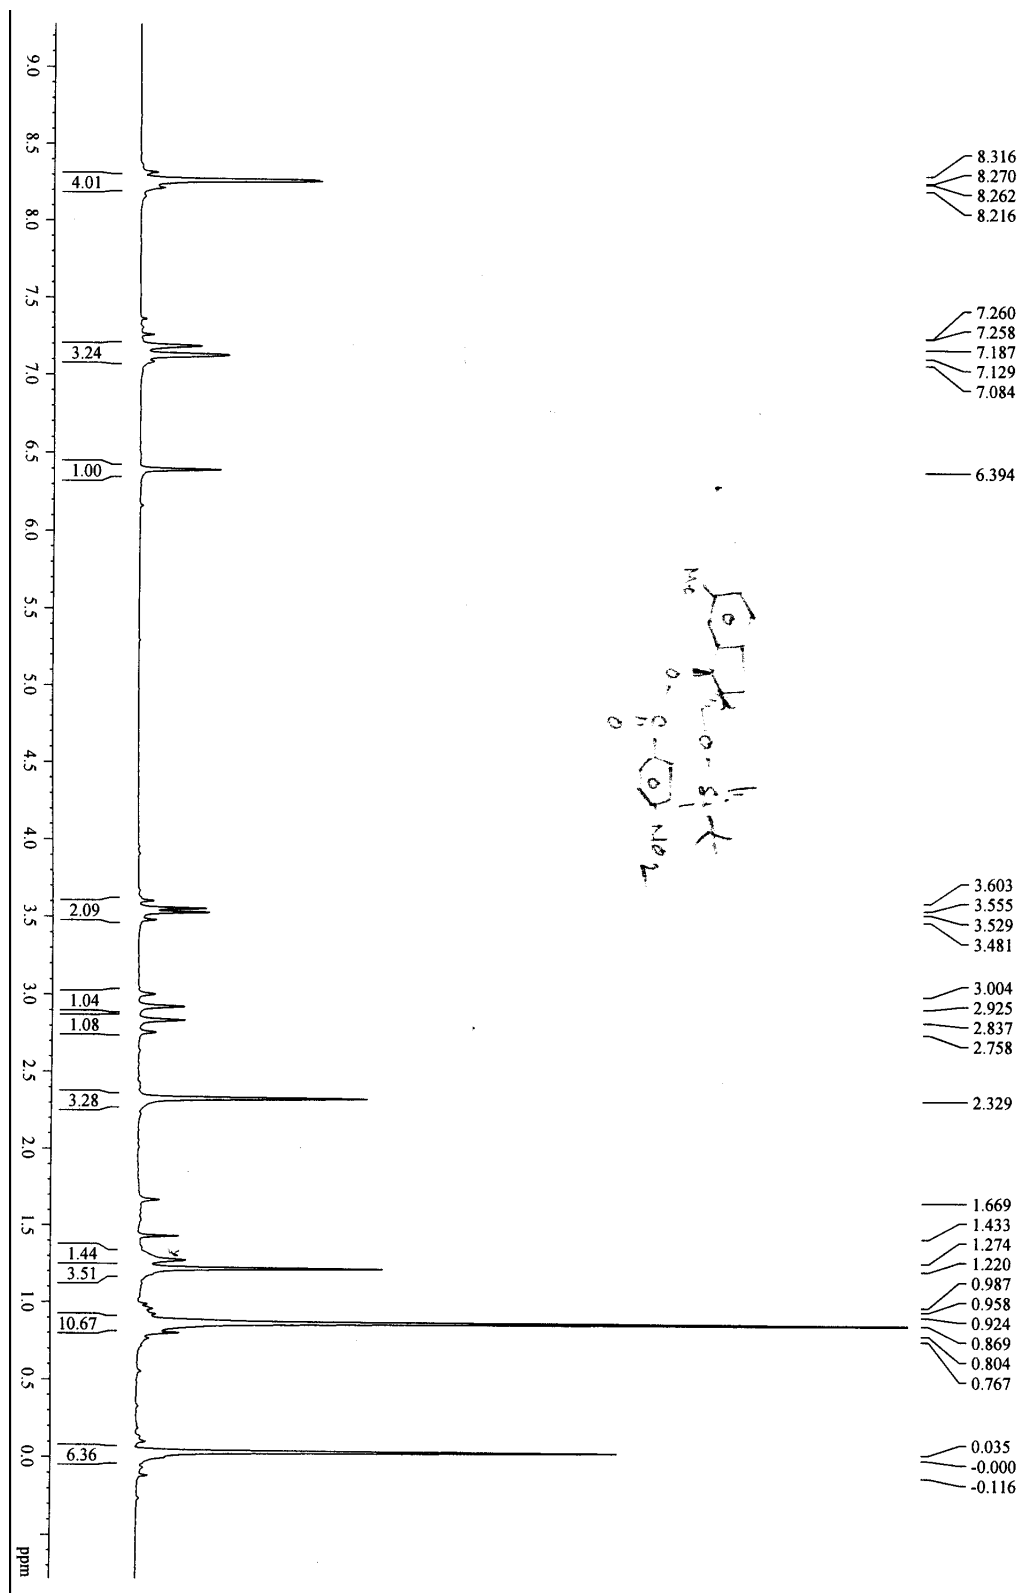

sn/rb/353

# <sup>13</sup>C NMR of compound 55

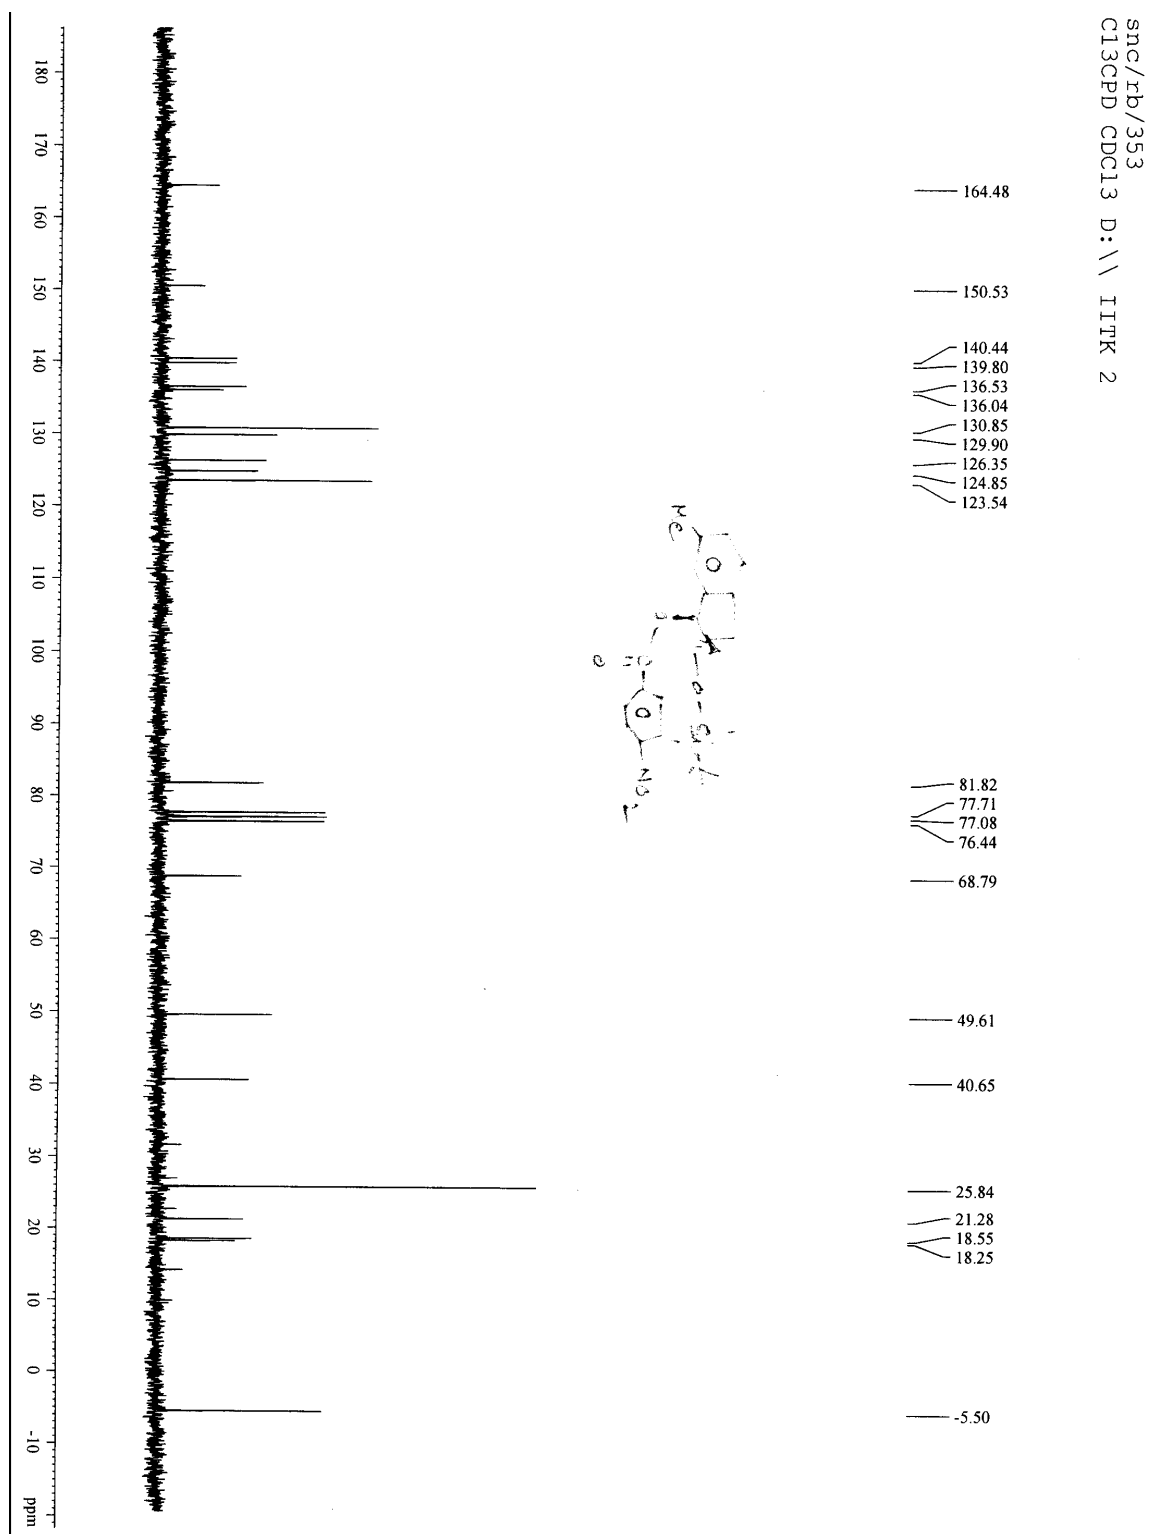



# <sup>1</sup>H NMR of compound 56

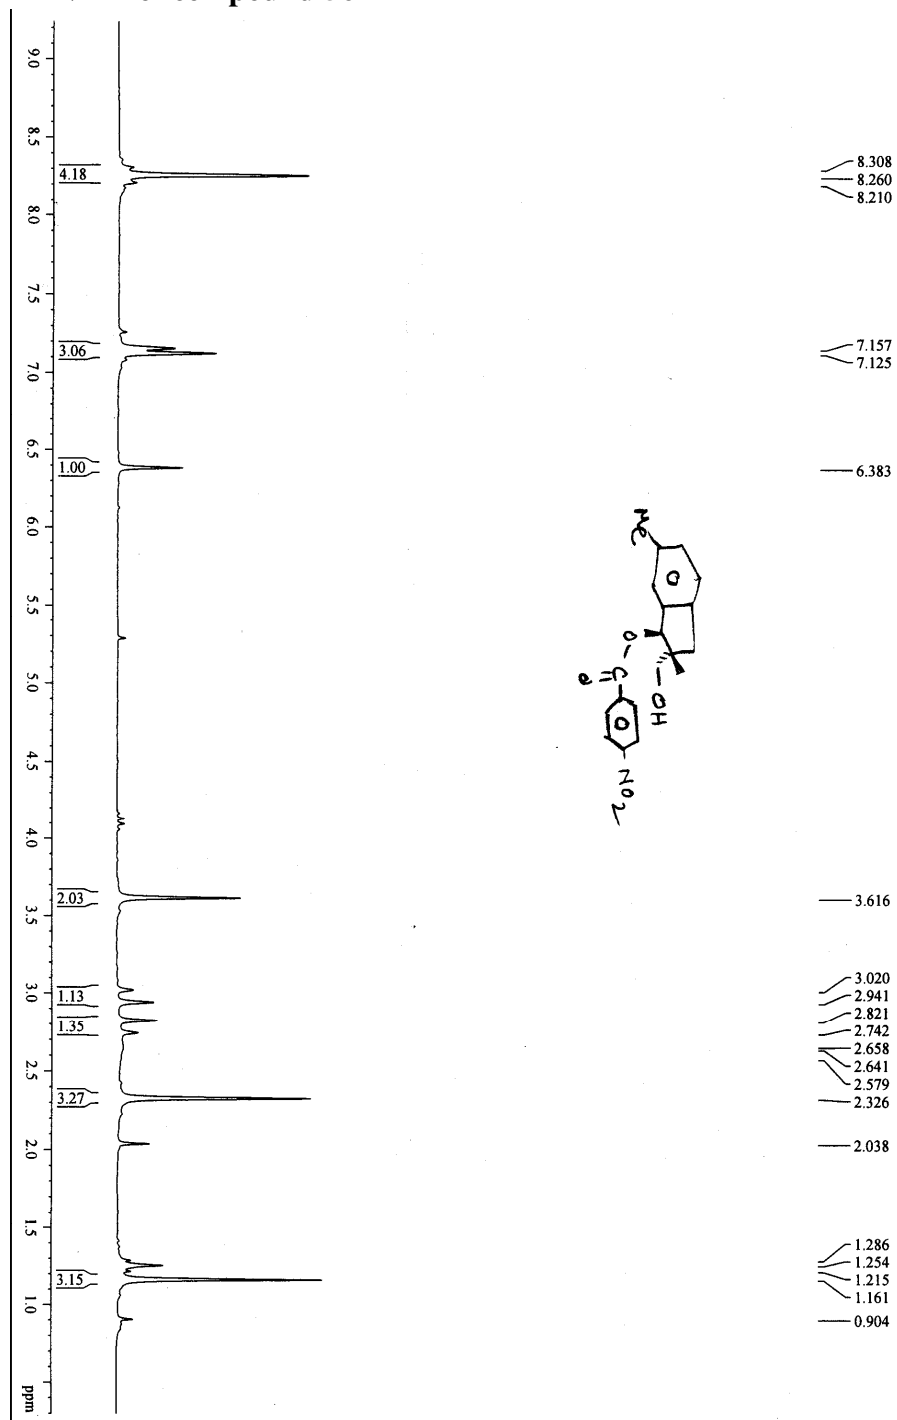

sn/rb/354

# <sup>13</sup>C NMR of compound 56

snc/rb/354  
C13CPD CDC13 D:\ IITK 34

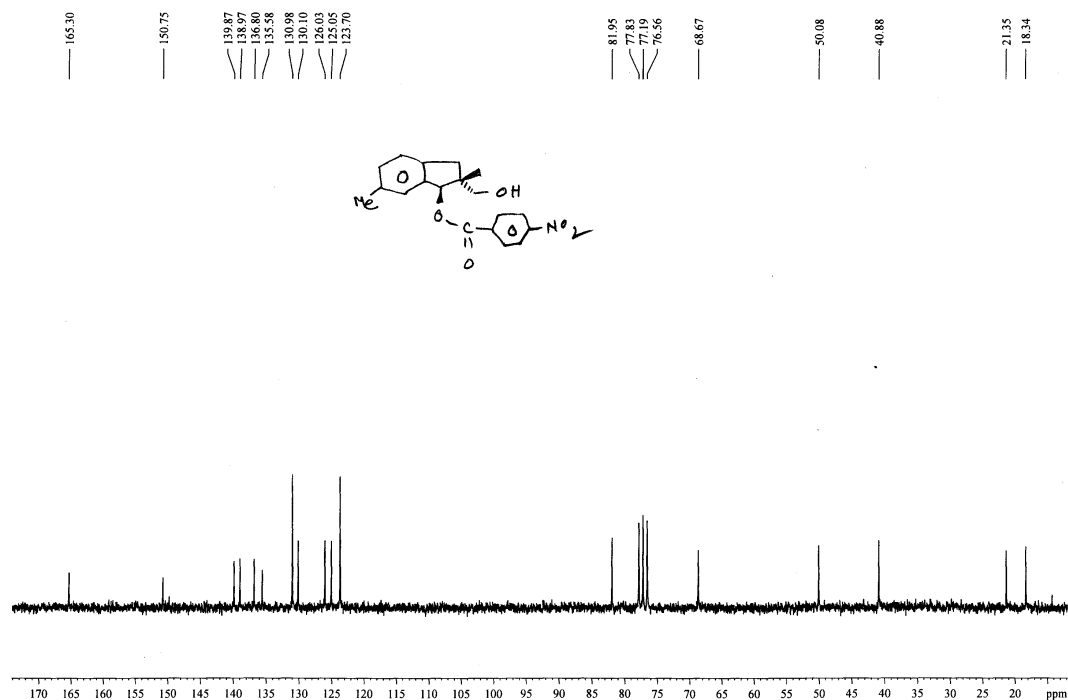

# <sup>1</sup>H NMR of compound 57

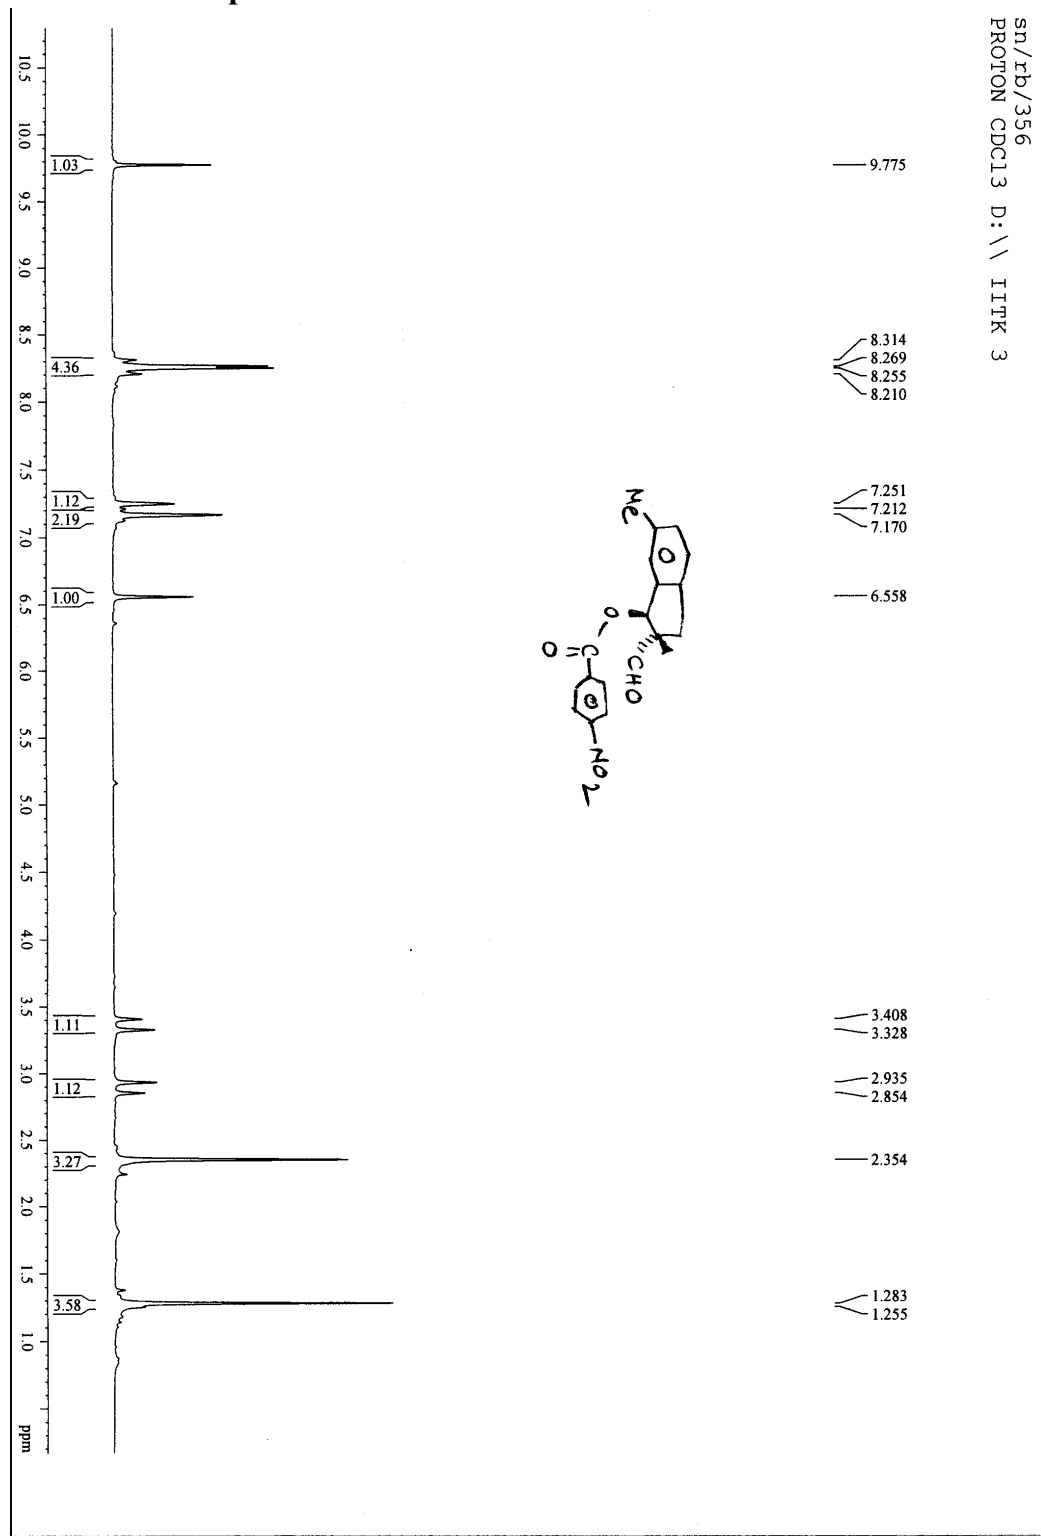

<sup>13</sup>C NMR of compound 57

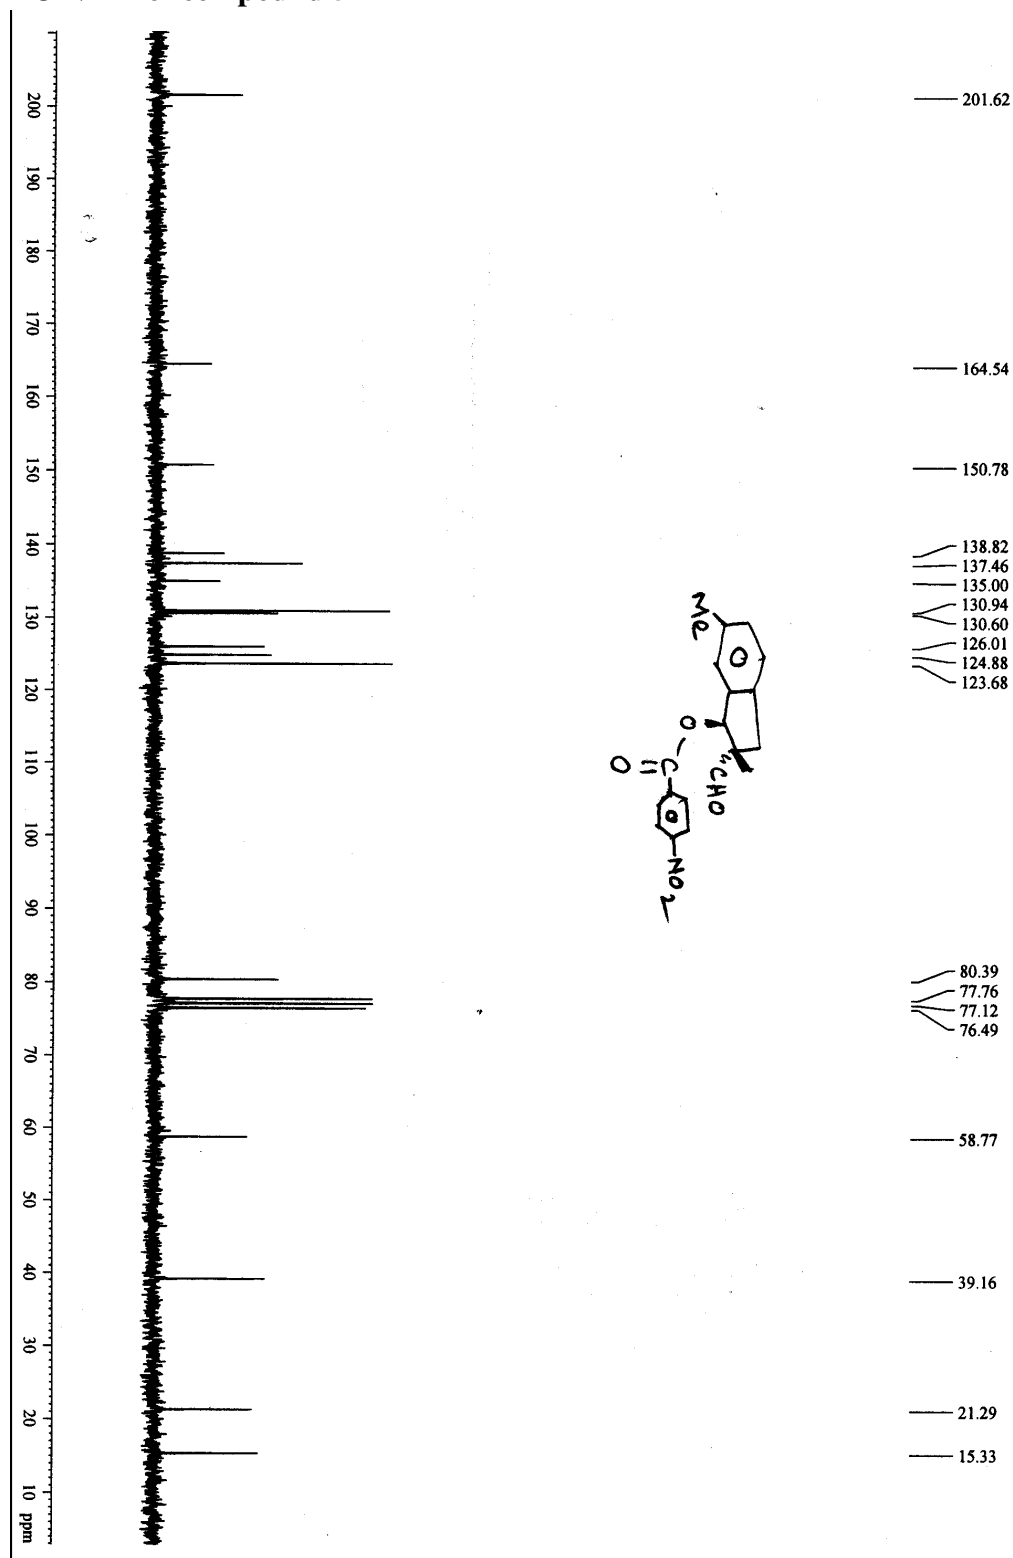

sn/rb/356  
C13CPD CDCl3 D:\ IITK 23

**<sup>1</sup>H NMR of compound 58**

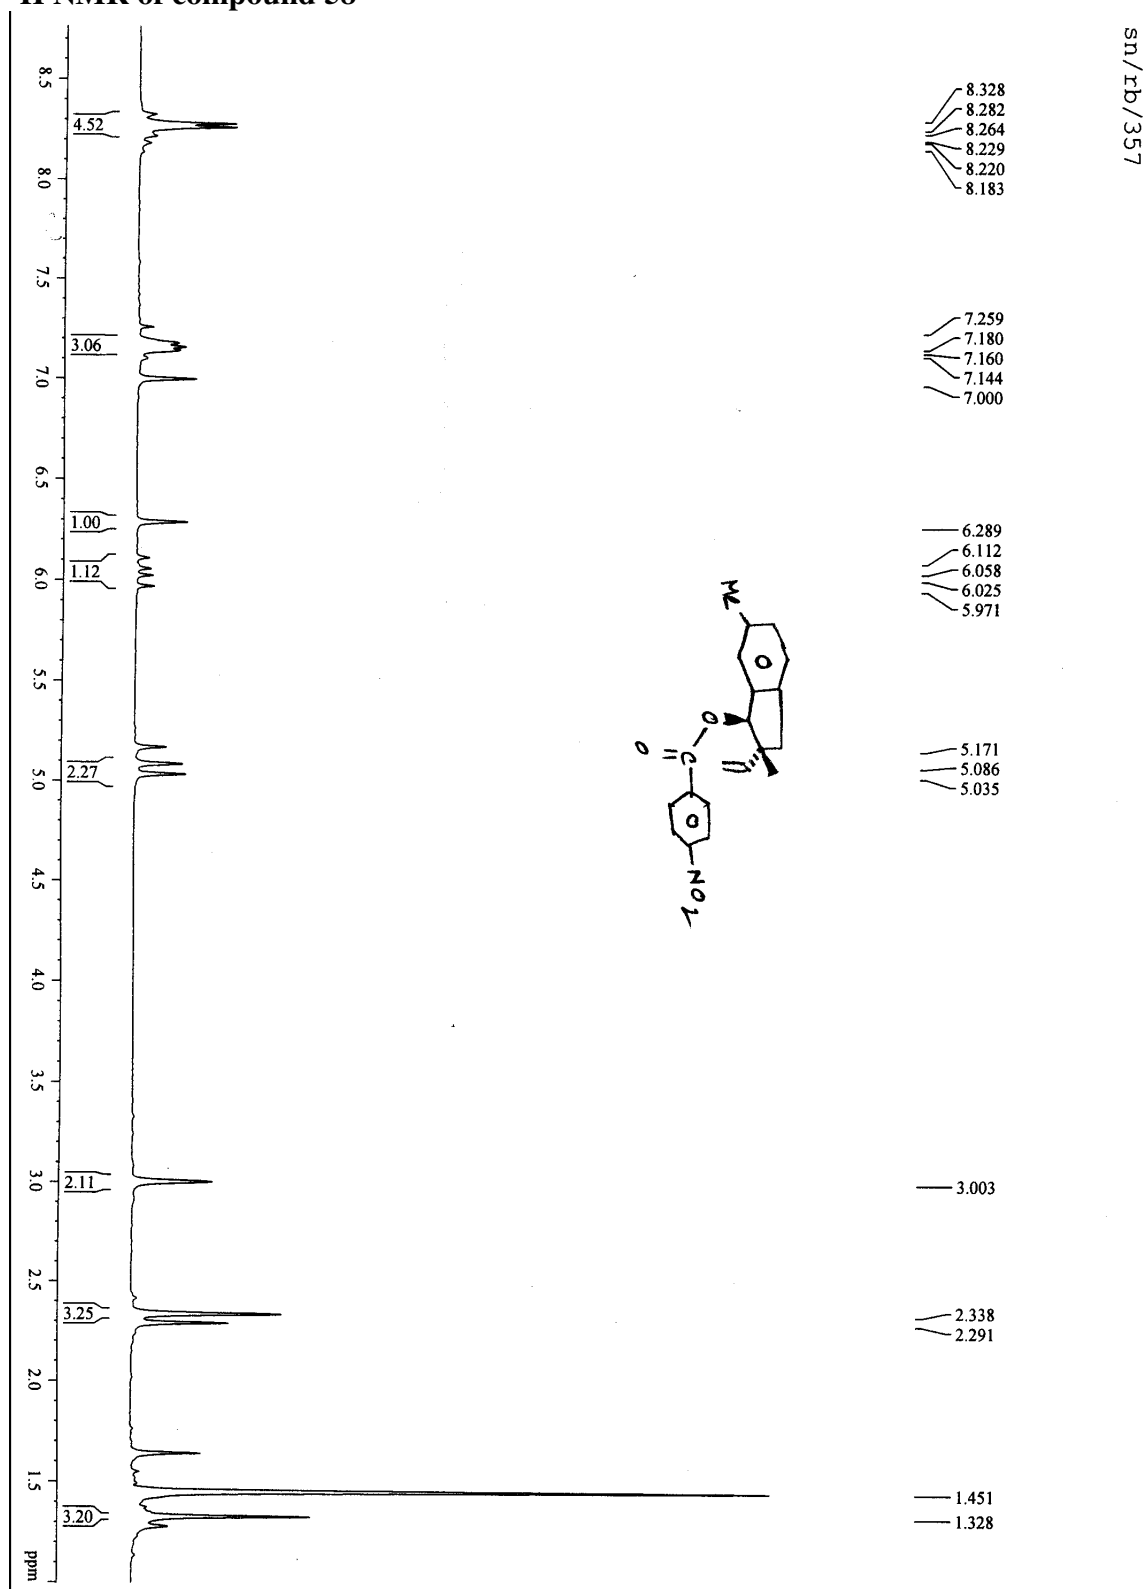

# <sup>13</sup>C NMR of compound 58

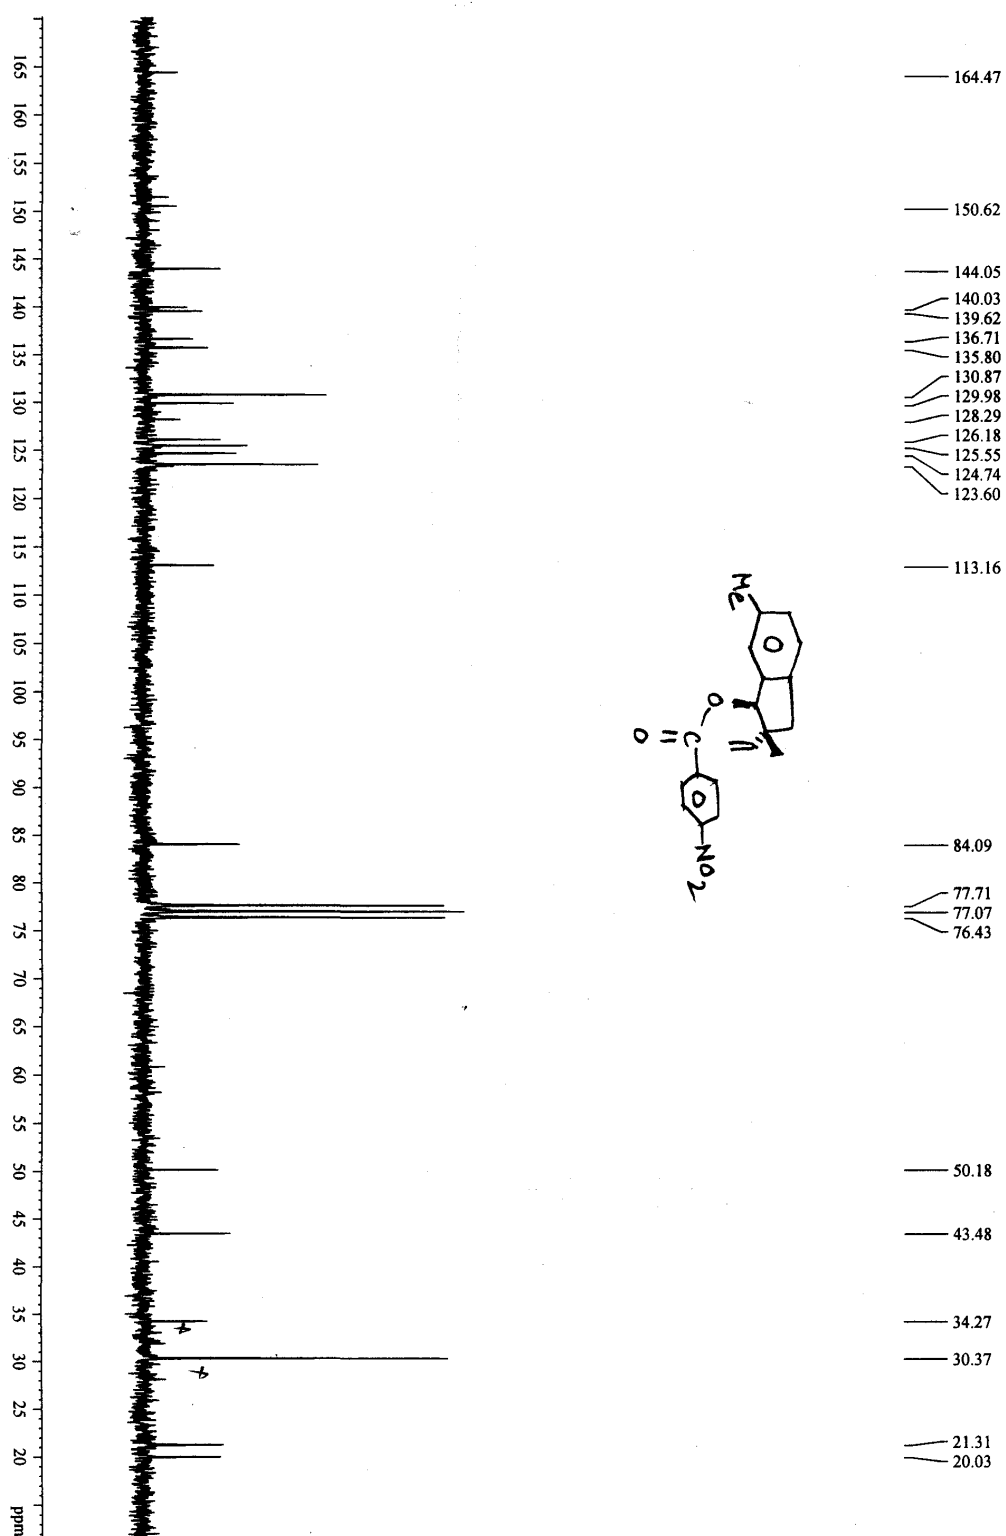

snc/rb/357  
C13CPD CDCl3 D:\ IITK 2

**<sup>1</sup>H NMR of compound 59**

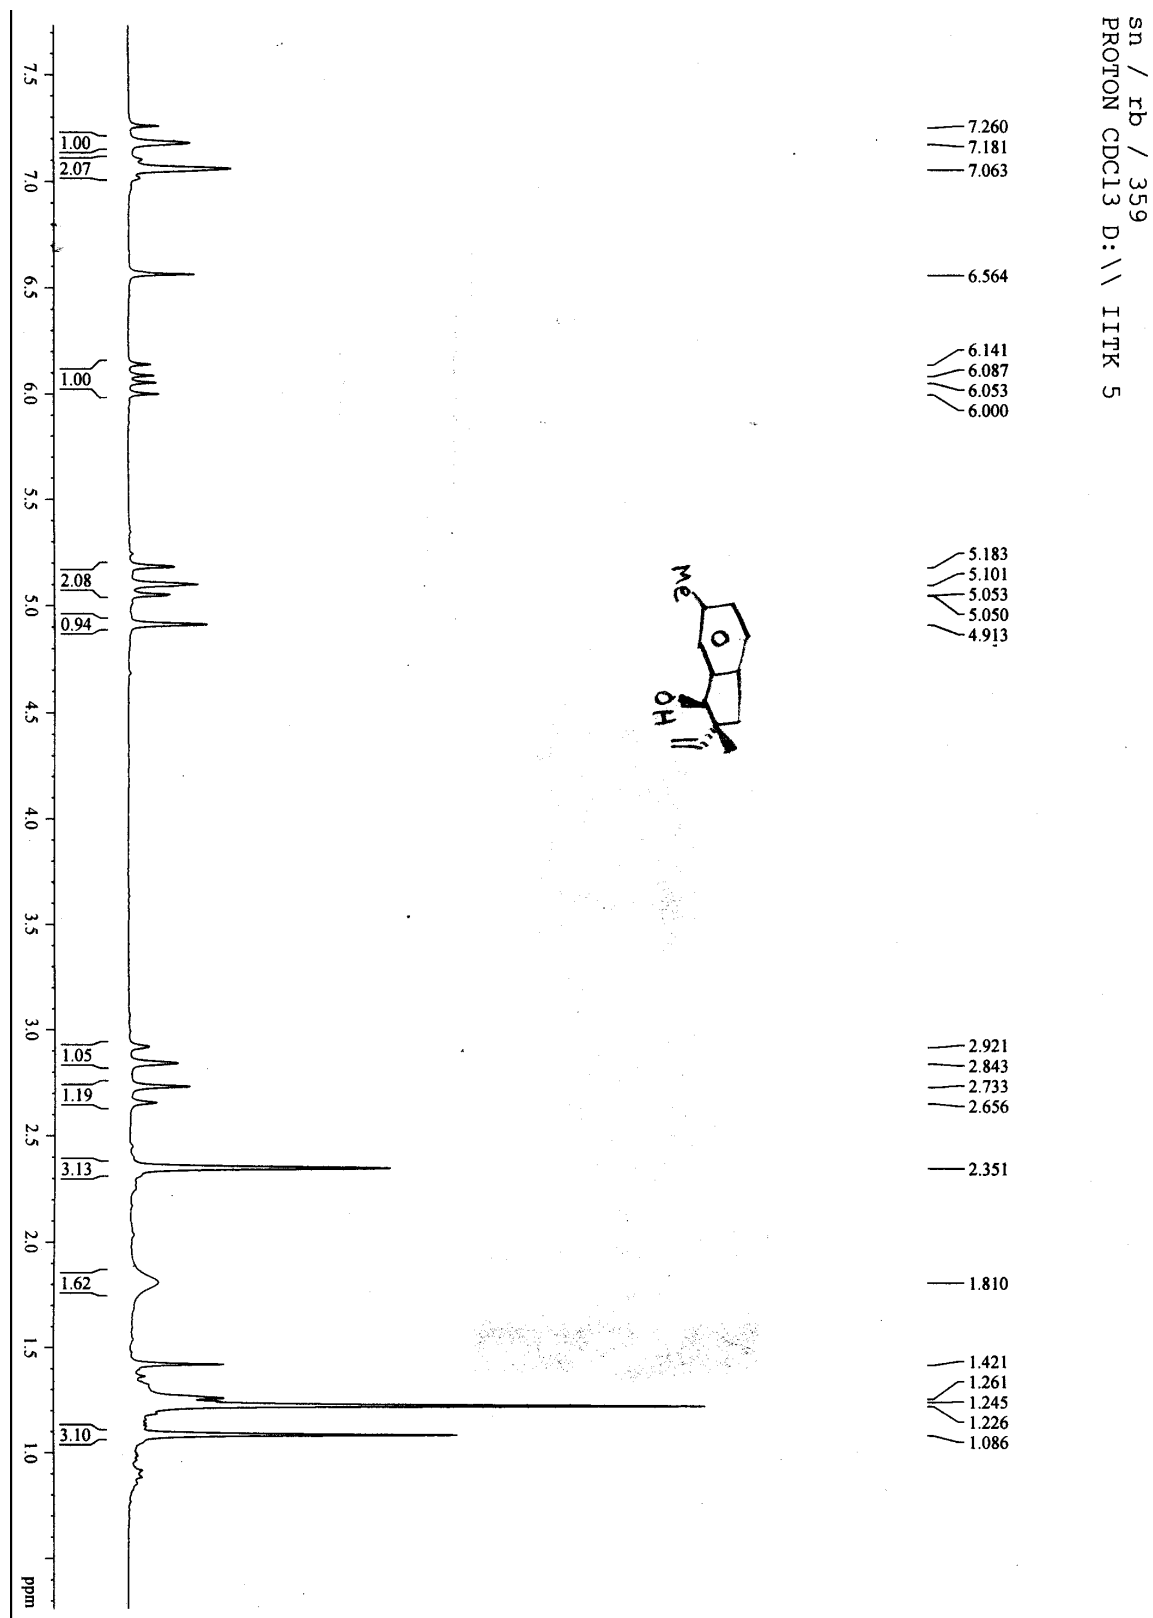

# <sup>13</sup>C NMR of compound 59

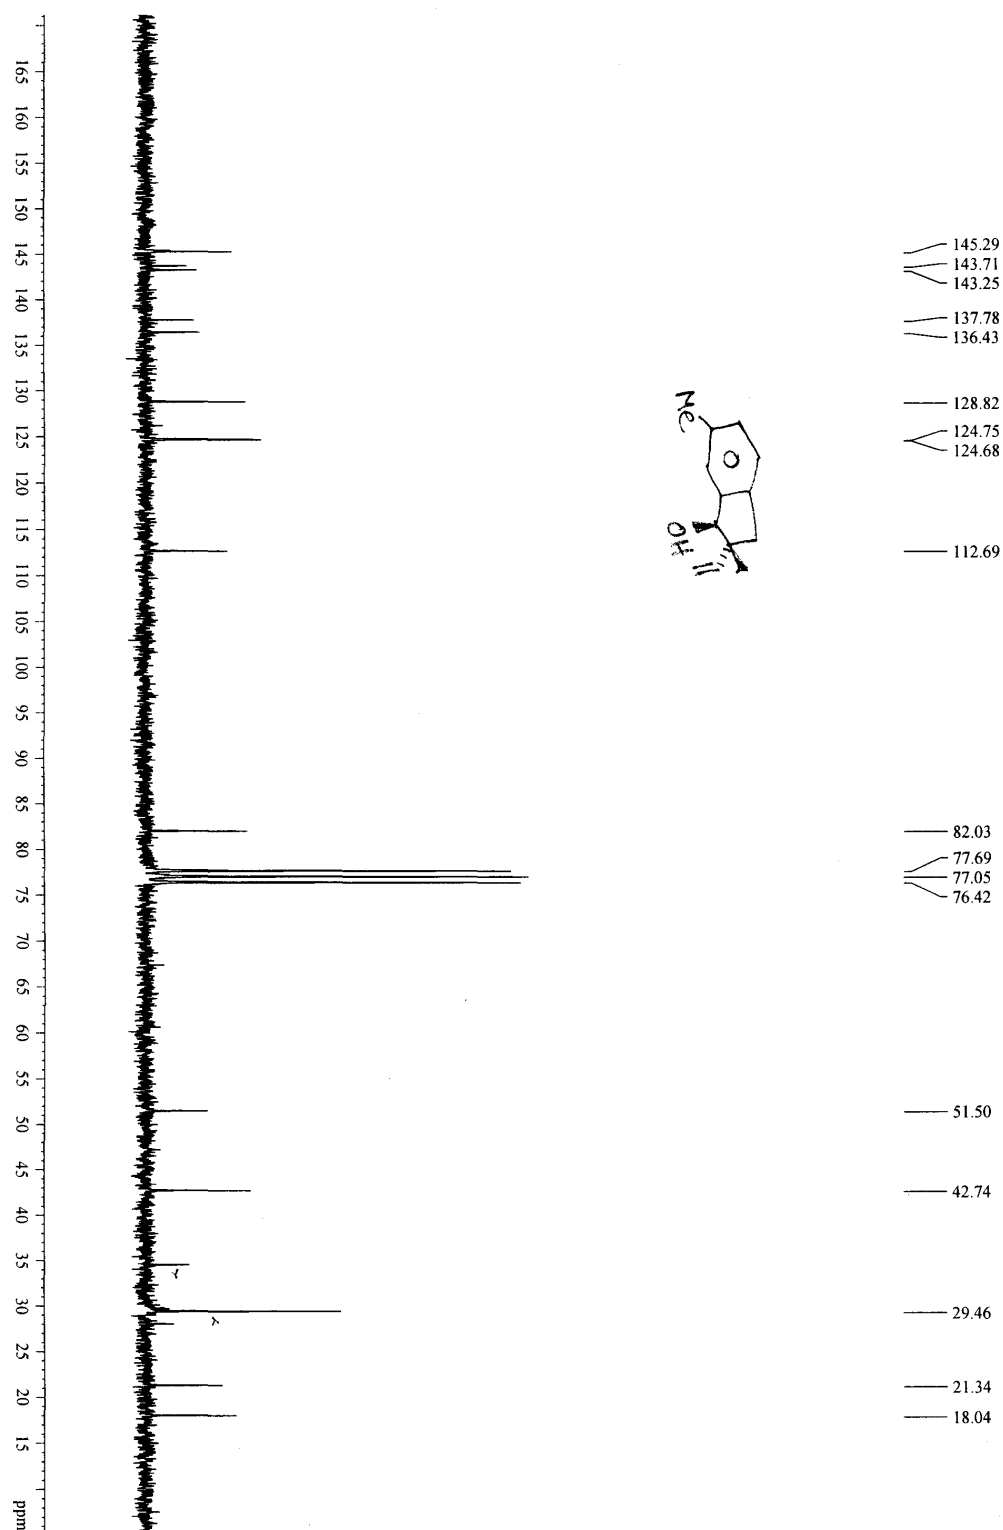

snc/rb/359  
C13CPD CDCl3 D:\ IITK 2



**<sup>1</sup>H NMR of compound 60**

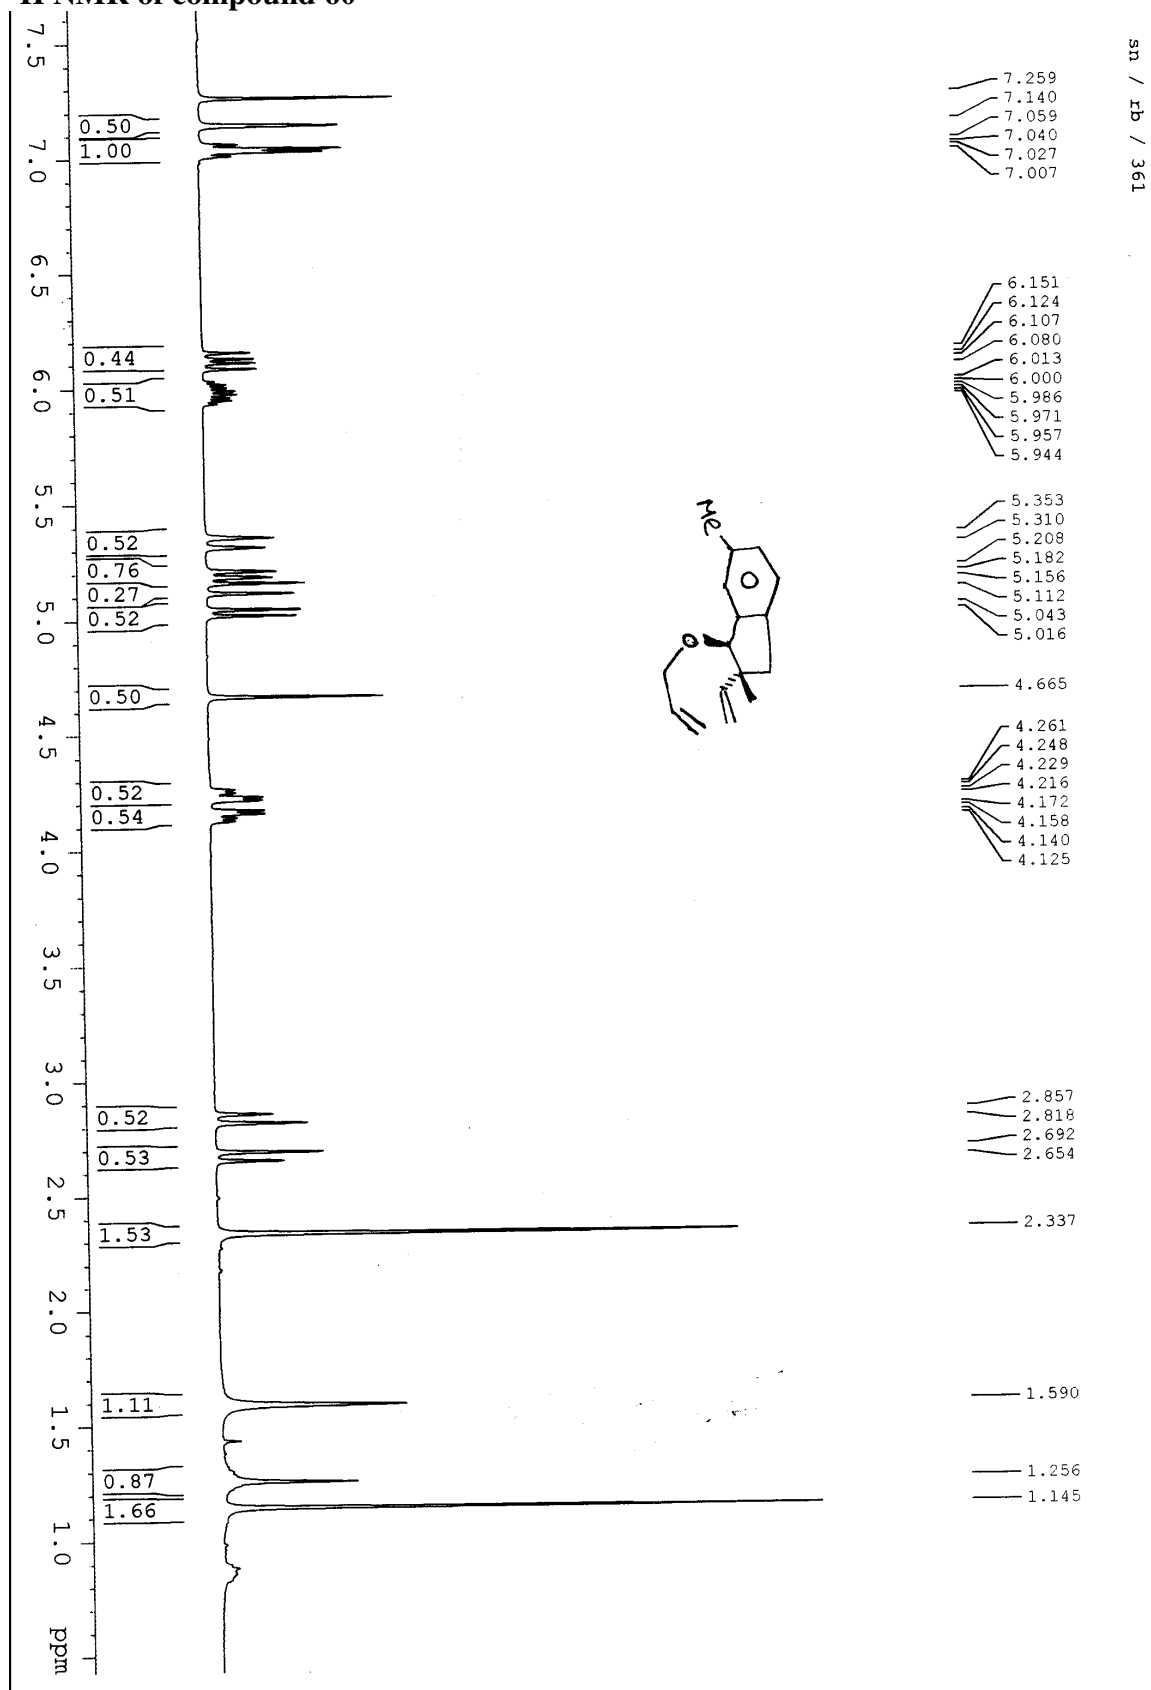

# <sup>13</sup>C NMR of compound 60

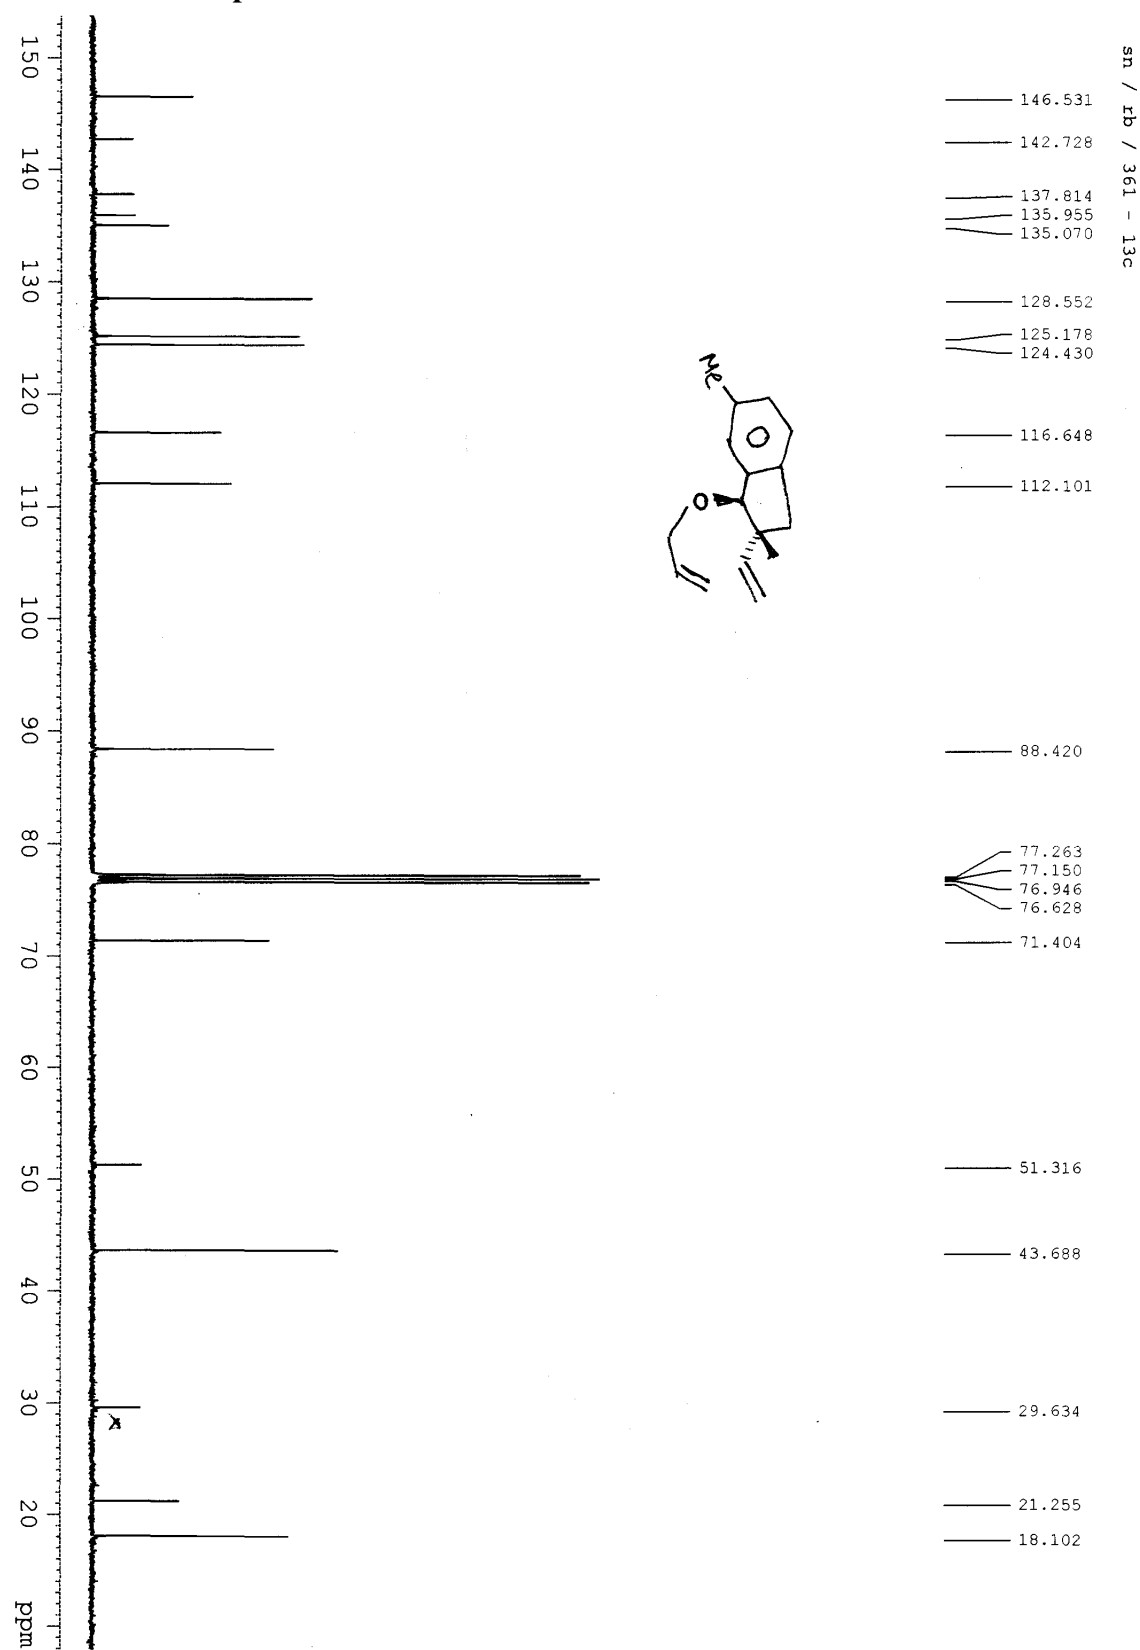

DEPT 135 NMR of compound 60

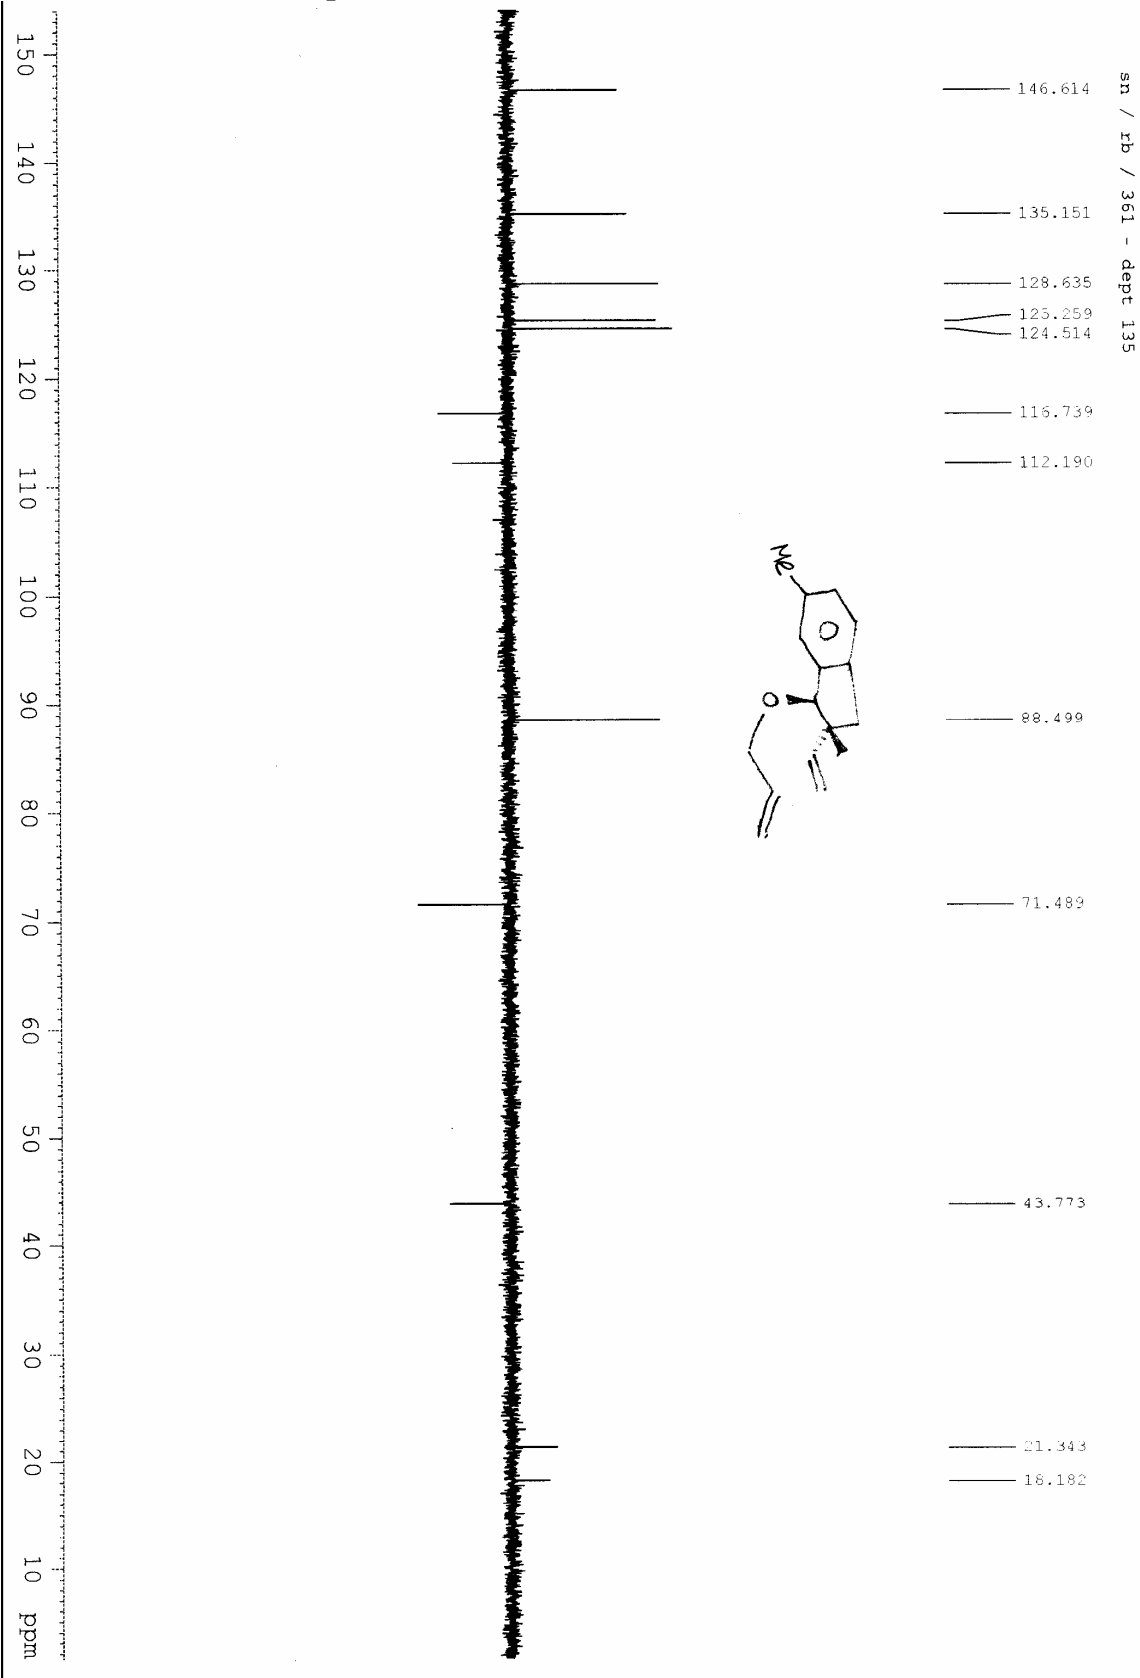

**<sup>1</sup>H NMR of compound 61**

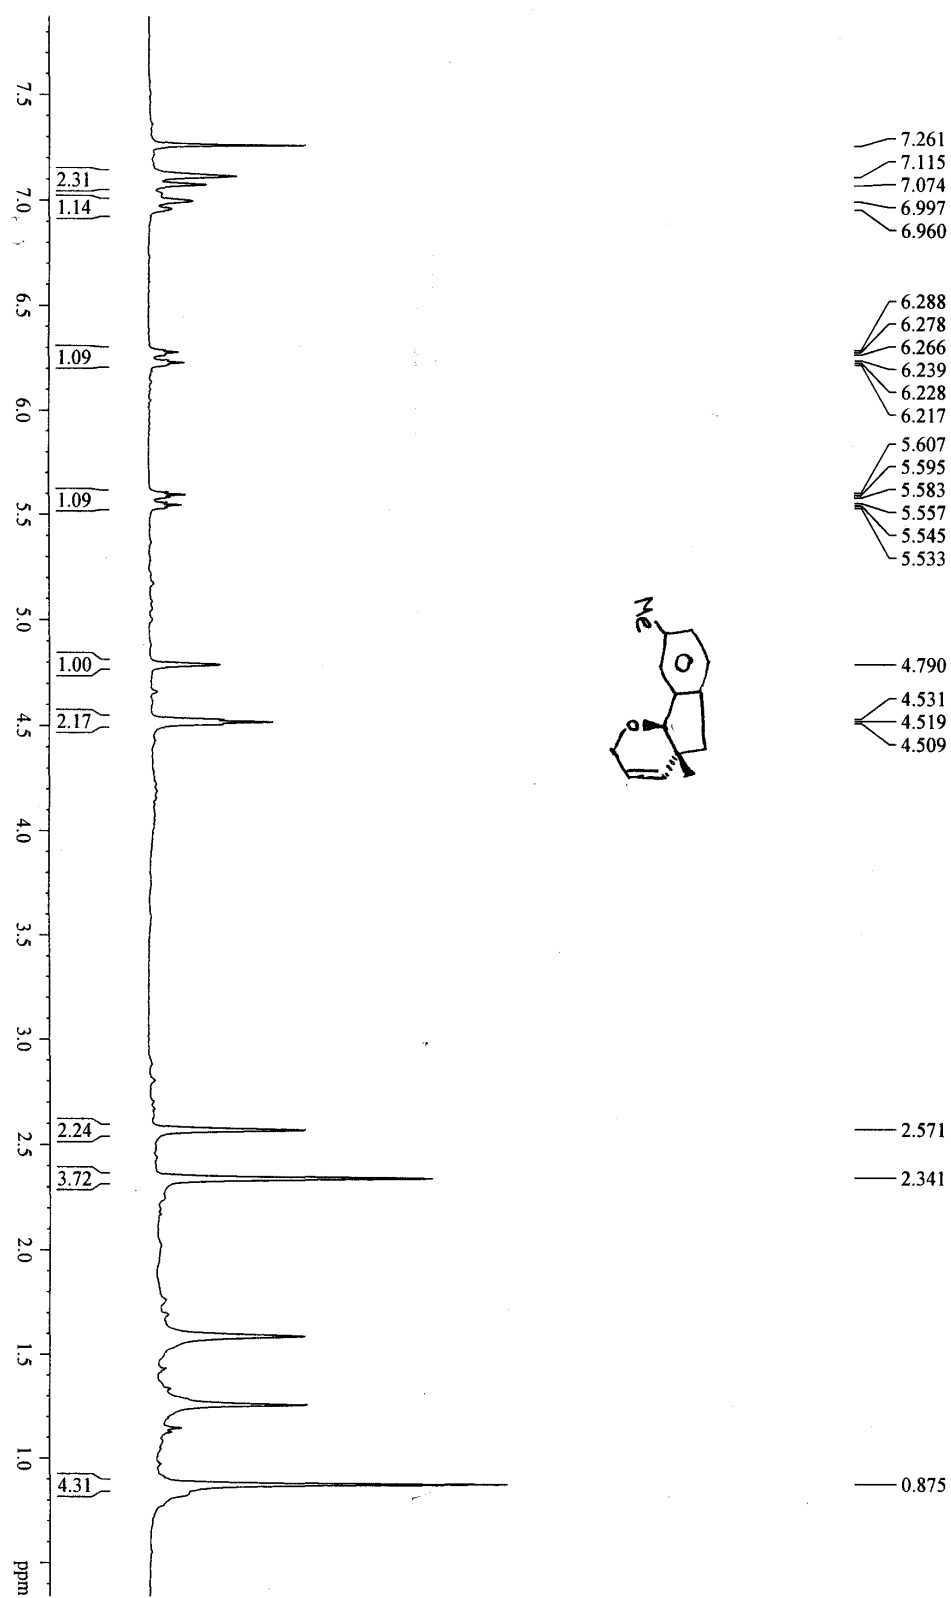

sn / rb / 368

# <sup>13</sup>C NMR of compound 61

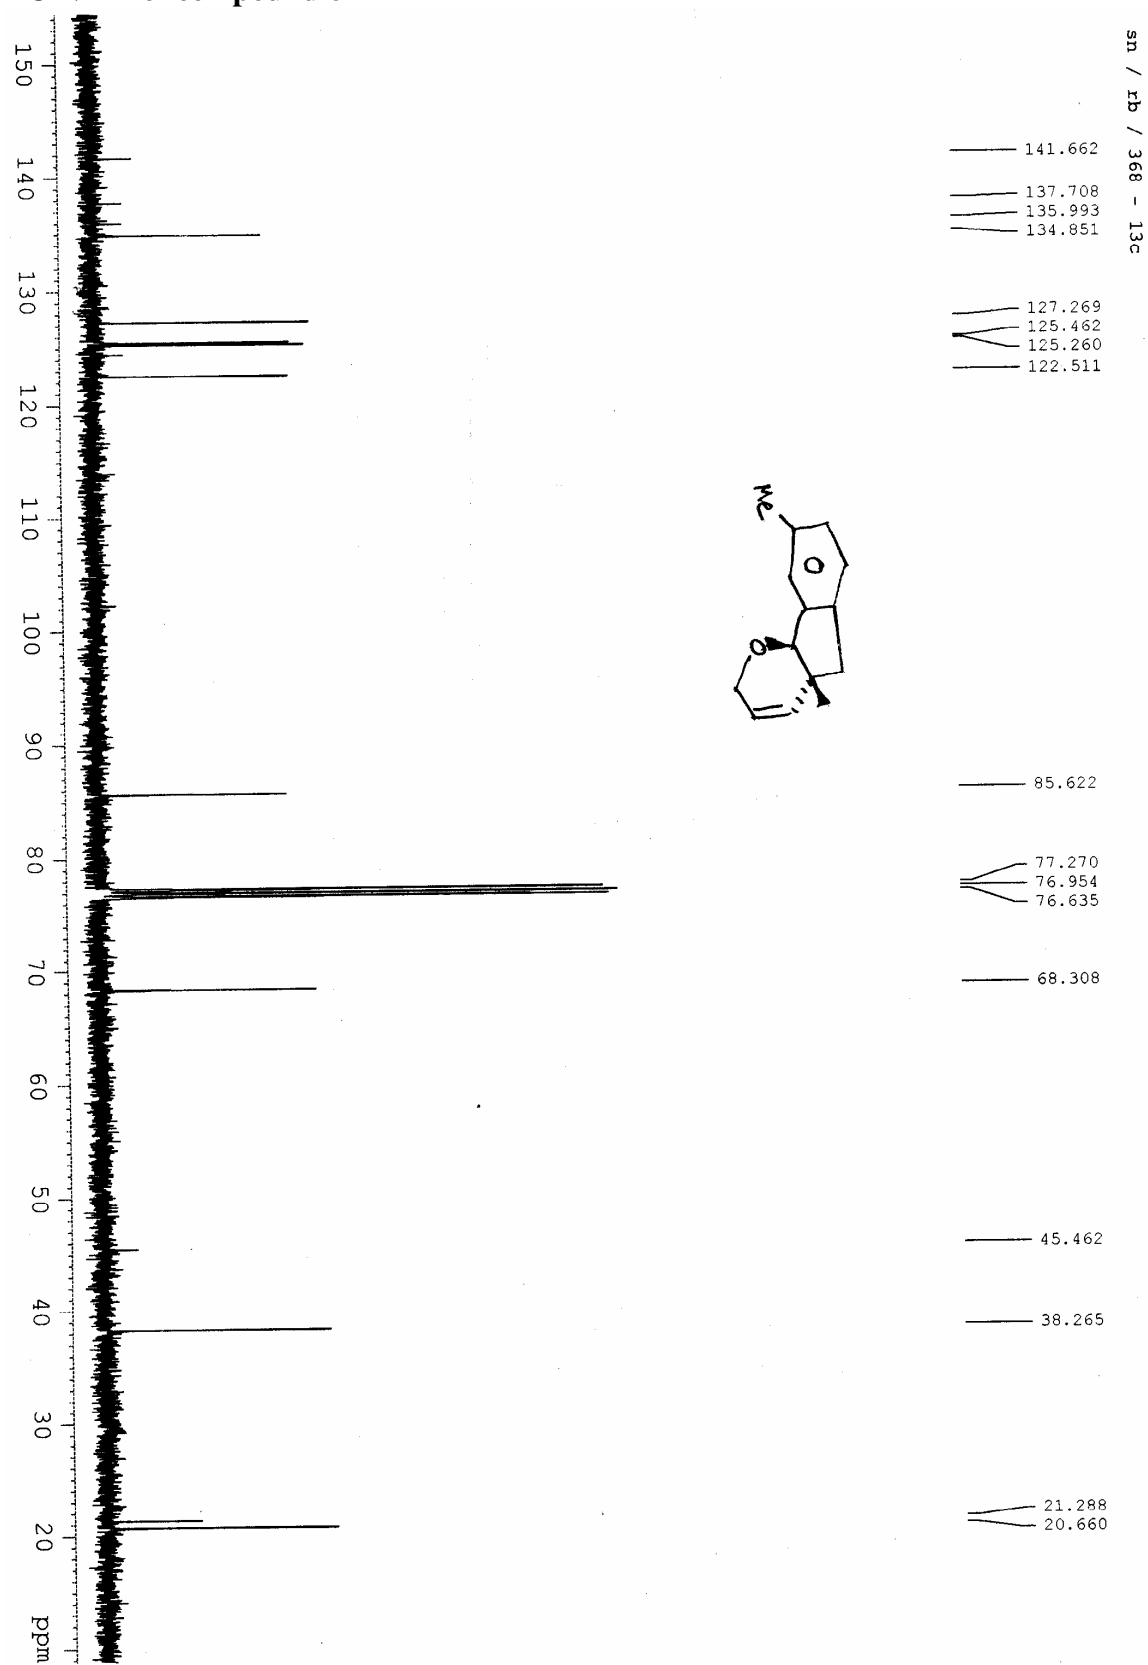

DEPT 135 NMR of compound 61

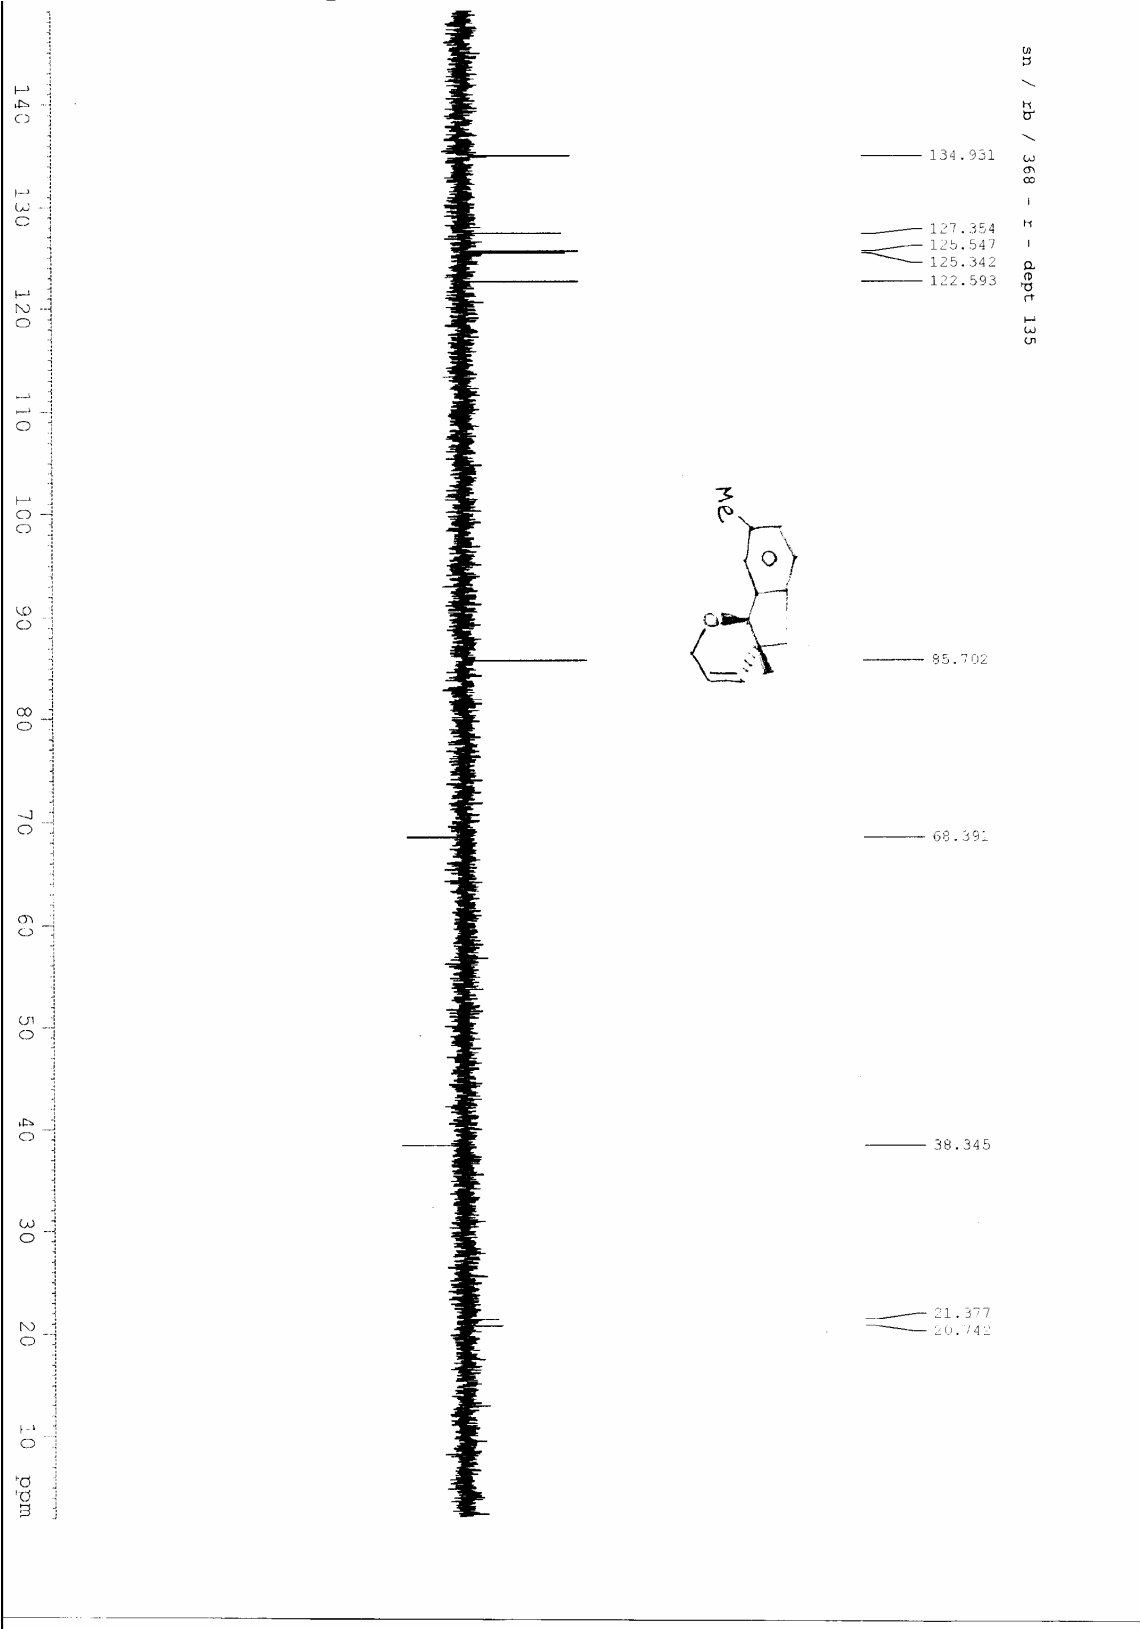

# <sup>1</sup>H NMR of compound 62

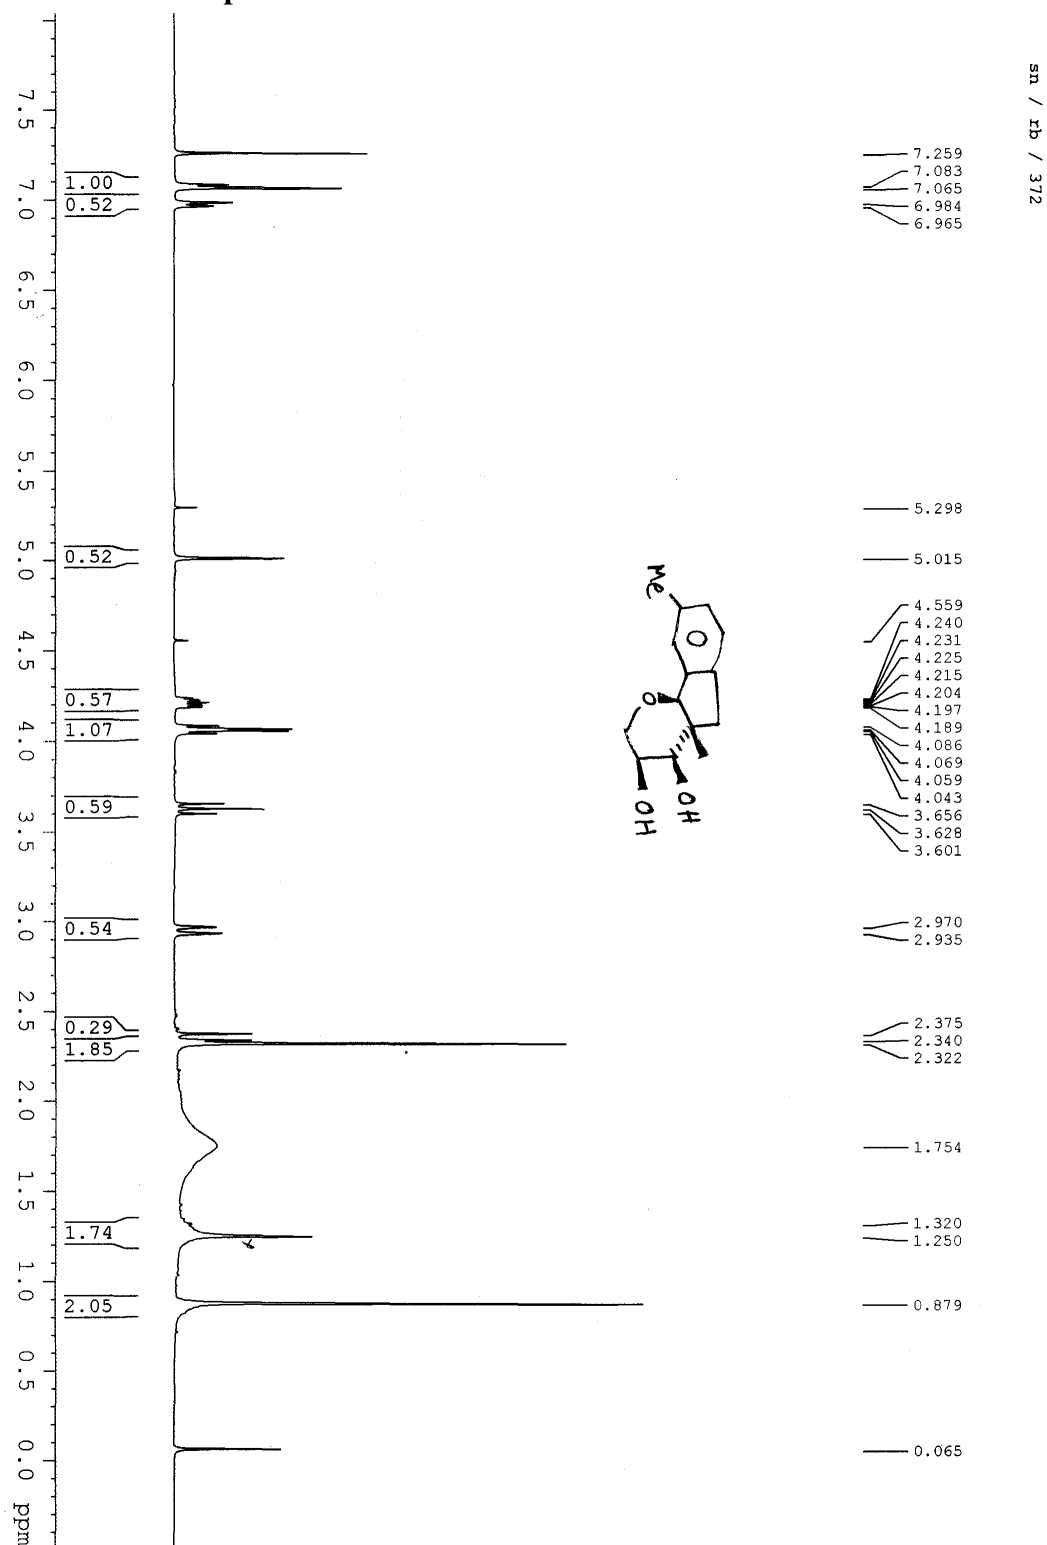

<sup>13</sup>C NMR of compound 62

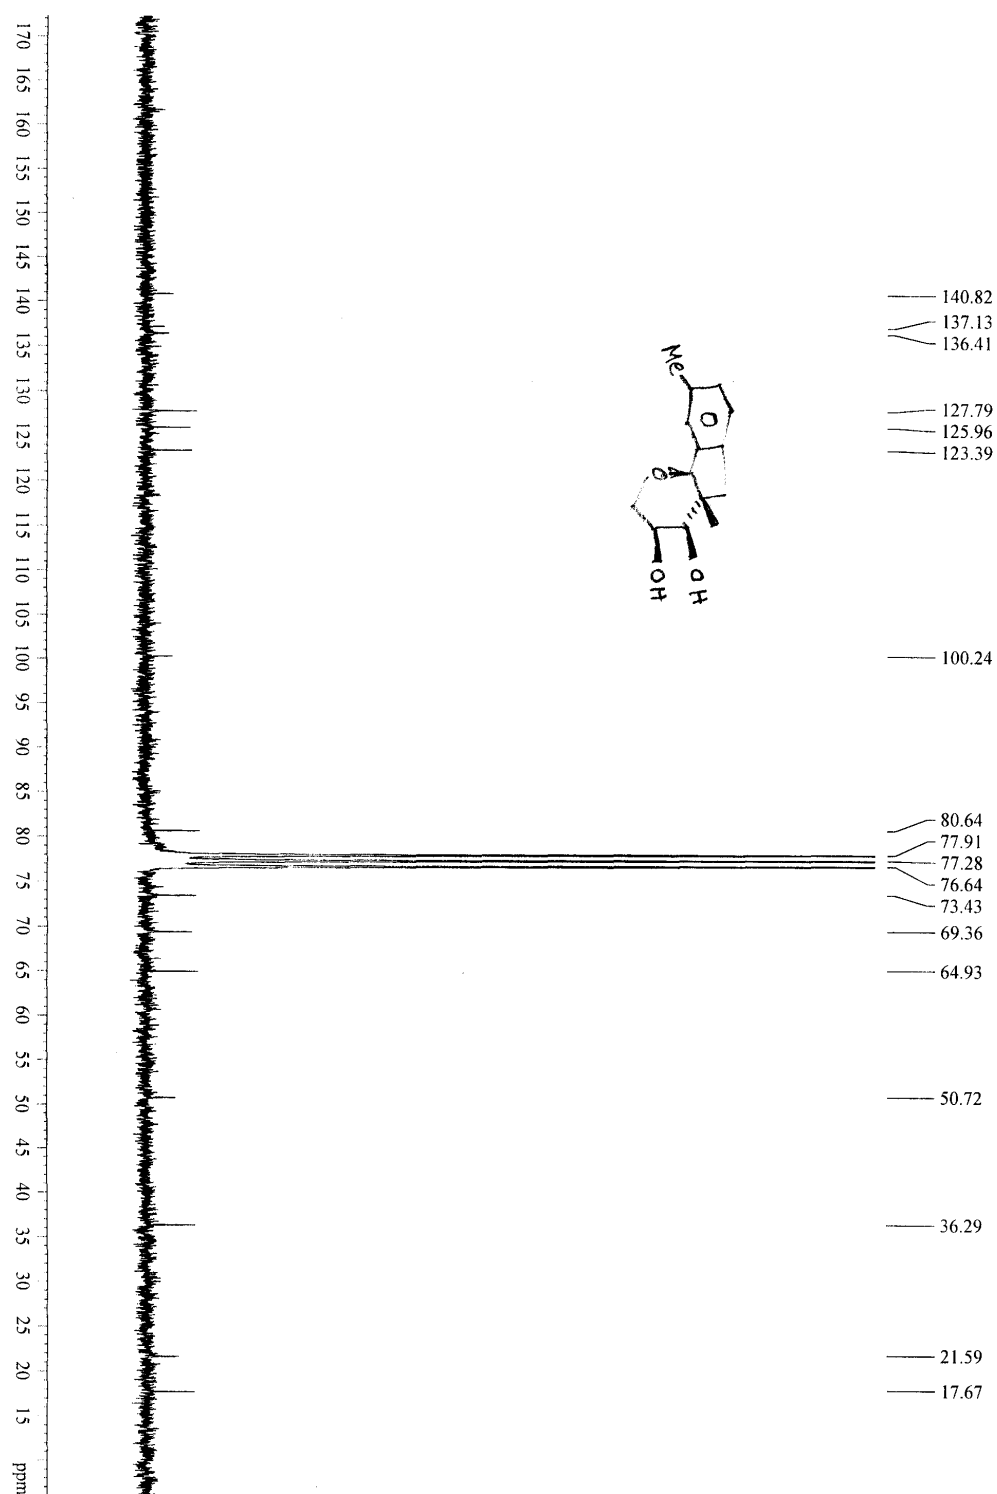

snc/rb/372  
C13CPD CDCl3 D:\ IITK 2



**<sup>1</sup>H NMR of bis PNBz derivative of 27**

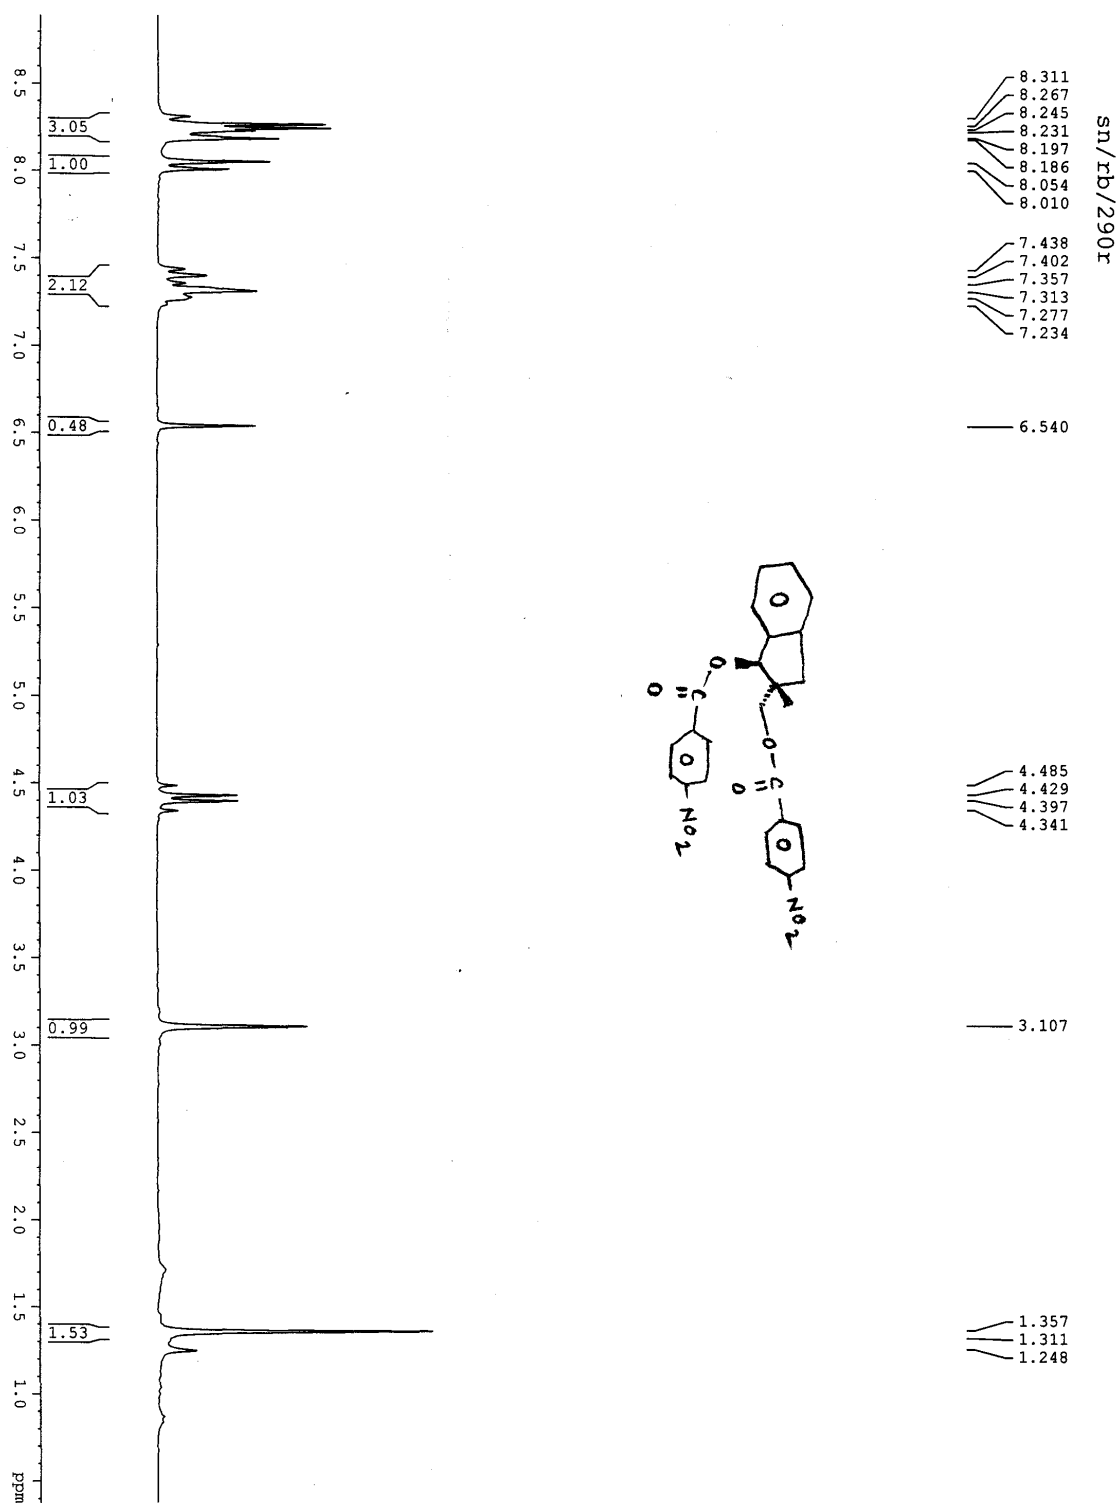

# <sup>13</sup>C NMR of bis PNBz derivative of 27

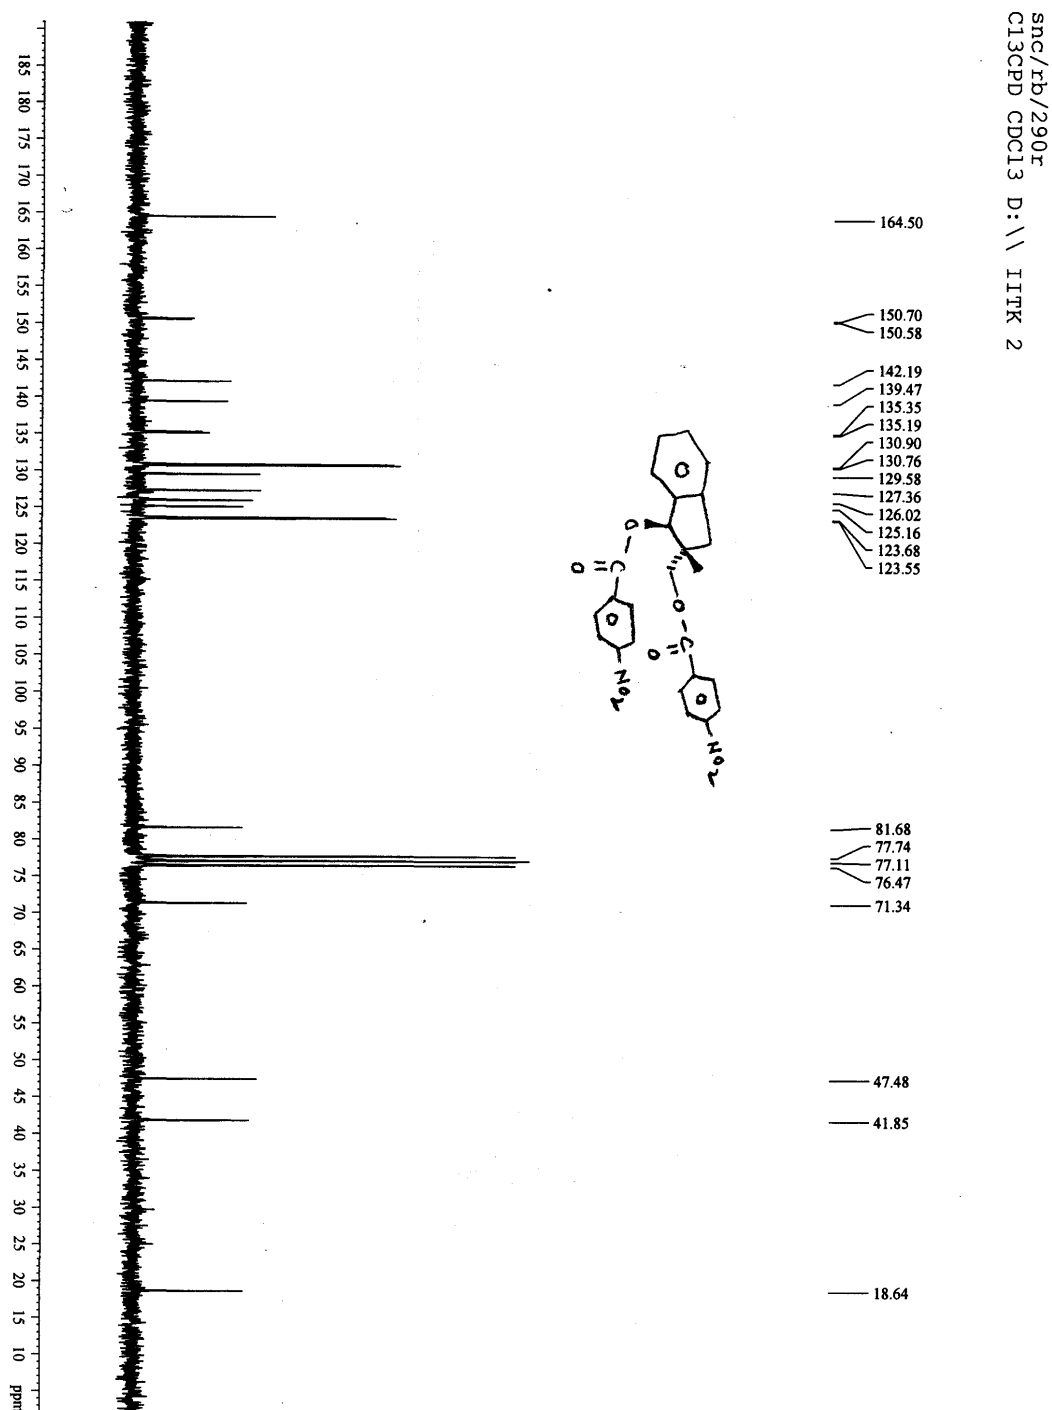

Supplement: c1ob06545a.pdf [file c1ob06545a.pdf]
