# Supplementary material for: Enantiomeric scaffolding of α-tetralone and related scaffolds by EKR (Enzymatic Kinetic Resolution) and stereoselective ketoreduction with ketoreductases
Source: Royal Society of Chemistry journal article supplement (doi:10.1039/c1ob06545a), 2011-10-04
Supplement: c1ob06545a_2.pdf [file c1ob06545a_2.pdf]

# **Enantiomeric scaffolding of $\alpha$ -tetralone and related scaffolds by EKR (Enzymatic Kinetic Resolution) and stereoselective ketoreduction with ketoreductases**

Rajib Bhuniya and Samik Nanda\*

Department of Chemistry, Indian Institute of Technology, Kharagpur, 721302, India

[snanda@chem.iitkgp.ernet.in](mailto:snanda@chem.iitkgp.ernet.in)

## **Supporting Information Part II**

| <b>Contents</b>                           | <b>Page number</b> |
|-------------------------------------------|--------------------|
| <b>X-ray crystallographic information</b> | <b>2-4</b>         |
| <b>HPLC chromatogram</b>                  | <b>5-42</b>        |

X-ray crystal data of bis-paranitrobenzoate derivative of compound **27** (the following crystal has been deposited at the Cambridge Crystallographic Data Centre and has the deposition number CCDC 830578).

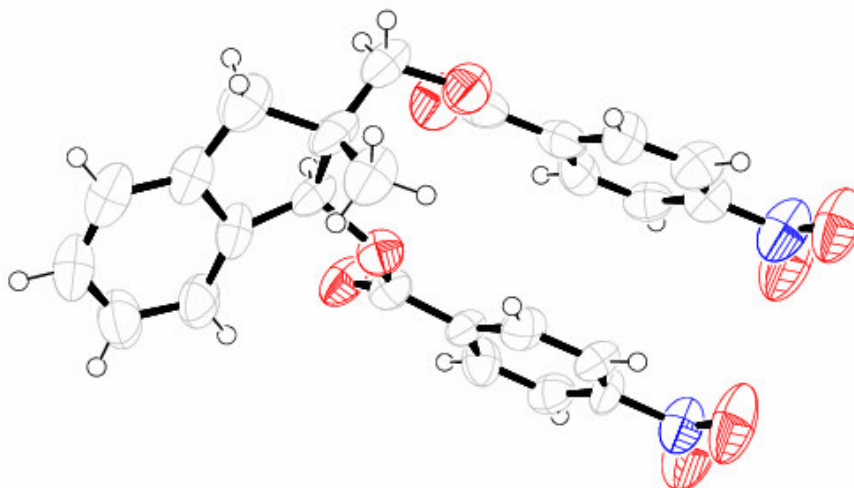

|                        |                                                                                                              |
|------------------------|--------------------------------------------------------------------------------------------------------------|
| Empirical formula      | C <sub>25</sub> H <sub>20</sub> N <sub>2</sub> O <sub>8</sub>                                                |
| Formula weight         | 476.43                                                                                                       |
| Temperature            | 293 K                                                                                                        |
| Wavelength             | 0.71073 Å                                                                                                    |
| Crystal system         | triclinic                                                                                                    |
| Space group            | P 1                                                                                                          |
| Unit cell dimensions   | a = 6.717(3) Å<br>b = 7.176(3) Å<br>c = 12.147(4) Å<br>α = 99.024(11)°<br>β = 99.364(12)°<br>γ = 91.872(11)° |
| Volume, Z              | 569.5(4) Å <sup>3</sup> , 1                                                                                  |
| Density                | 1.389 Mg/m <sup>3</sup>                                                                                      |
| Crystal description    | Prism                                                                                                        |
| Crystal color          | Colorless                                                                                                    |
| Absorption coefficient | 0.105 mm <sup>-1</sup>                                                                                       |
| F (000)                | 248                                                                                                          |

|                                    |                                                           |
|------------------------------------|-----------------------------------------------------------|
| Crystal size                       | 0.2 x 0.2 x 0.1 mm <sup>3</sup>                           |
| Reflections collected              | 5184                                                      |
| $\theta$ range for data collection | 1.72 to 22.39°                                            |
| Independent reflections            | 2942 [R (int) = 0.0654]                                   |
| Goodness -of-fit on F <sup>2</sup> | 0.997                                                     |
| Limiting indices                   | -6<= <i>h</i> <=7, -7<= <i>k</i> <=7, -12<= <i>l</i> <=13 |
| Data/ restraints/parameters        | 2942/3/317                                                |
| Final R indices [1>2 $\sigma$ (I)] | R1 = 0.0769, wR2 = 0.1893                                 |
| R indices (all data)               | R1 = 0.1285, wR2 = 0.2251                                 |
| Absolute structure parameter       | -1(4)                                                     |

X-ray crystal data of bis-paranitrobenzoate derivative of compound **18** (the following crystal has been deposited at the Cambridge Crystallographic Data Centre and has the deposition number CCDC 830577).

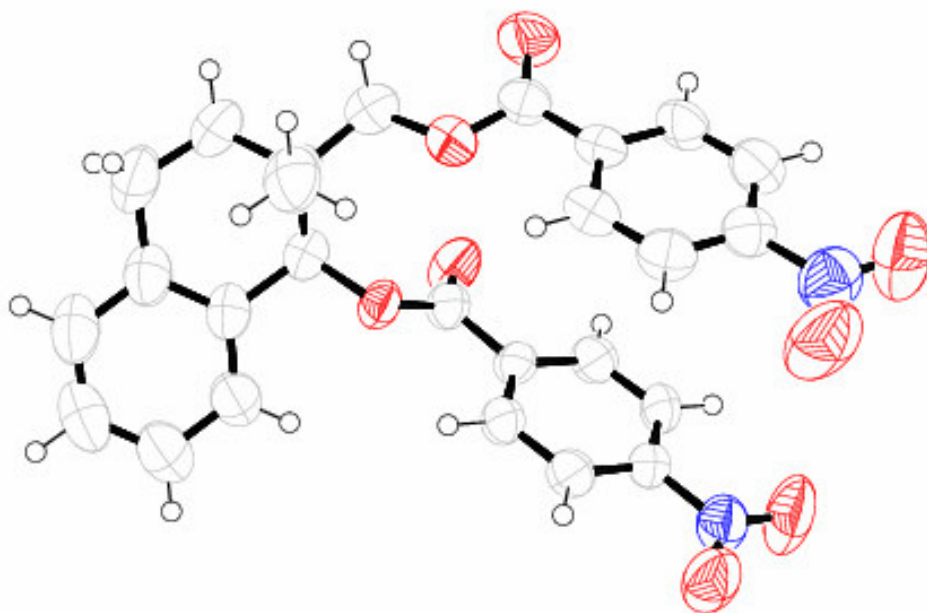

|                                    |                                                                                                                                |
|------------------------------------|--------------------------------------------------------------------------------------------------------------------------------|
| Empirical formula                  | C <sub>26</sub> H <sub>22</sub> N <sub>2</sub> O <sub>8</sub>                                                                  |
| Formula weight                     | 490.46                                                                                                                         |
| Temperature                        | 293 K                                                                                                                          |
| Wavelength                         | 0.71073 Å                                                                                                                      |
| Crystal system                     | monoclinic                                                                                                                     |
| Space group                        | P 21                                                                                                                           |
| Unit cell dimensions               | a = 6.805(5) Å<br>b = 13.163(5) Å<br>c = 13.478(5) Å<br>$\alpha$ = 90.000(5)°<br>$\beta$ = 99.373(5)°<br>$\gamma$ = 90.000(5)° |
| Volume, Z                          | 1191.2 (11) Å <sup>3</sup> , 2                                                                                                 |
| Density                            | 1.367 Mg/m <sup>3</sup>                                                                                                        |
| Crystal description                | Prism                                                                                                                          |
| Crystal color                      | Colorless                                                                                                                      |
| Absorption coefficient             | 0.103 mm <sup>-1</sup>                                                                                                         |
| F (000)                            | 512                                                                                                                            |
| Crystal size                       | 0.2 x 0.2 x 0.1 mm <sup>3</sup>                                                                                                |
| Reflections collected              | 12580                                                                                                                          |
| $\theta$ range for data collection | 1.53 to 23.75°                                                                                                                 |
| Independent reflections            | 3609 [R (int) = 0.0524]                                                                                                        |
| Goodness -of-fit on F <sup>2</sup> | 0.985                                                                                                                          |
| Limiting indices                   | -7<= $h$ <=7, -14<= $k$ <=14, -15<= $l$ <=15                                                                                   |
| Data/ restraints/parameters        | 3609/1/329                                                                                                                     |
| Final R indices [I>2 $\sigma$ (I)] | R1 = 0.0459, wR2 = 0.0823                                                                                                      |
| R indices (all data)               | R1 = 0.0973, wR2 = 0.1016                                                                                                      |
| Absolute structure parameter       | -0.5(15)                                                                                                                       |

# HPLC chromatogram of racemic 1

Department of Chemistry, IIT-Kharagpur

Sample Information  
Acquired by : Admin  
Sample Name : tetralone-me-CH2OH-racemic  
Sample ID : transesterification  
Vial# :  
Injection Volume : 5 uL  
Data Filename : tetralone-me-CH2OH-racemic.lcd  
Method Filename : adduct1.lcm  
Batch Filename :  
Report Filename : Default.lcr  
Date Acquired : 10/29/2008 2:29:46 PM  
Data Processed : 10/29/2008 2:39:51 PM

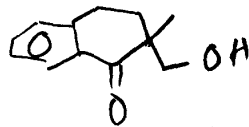

(I)

hex: iPr n: 9:1  
1ml/min

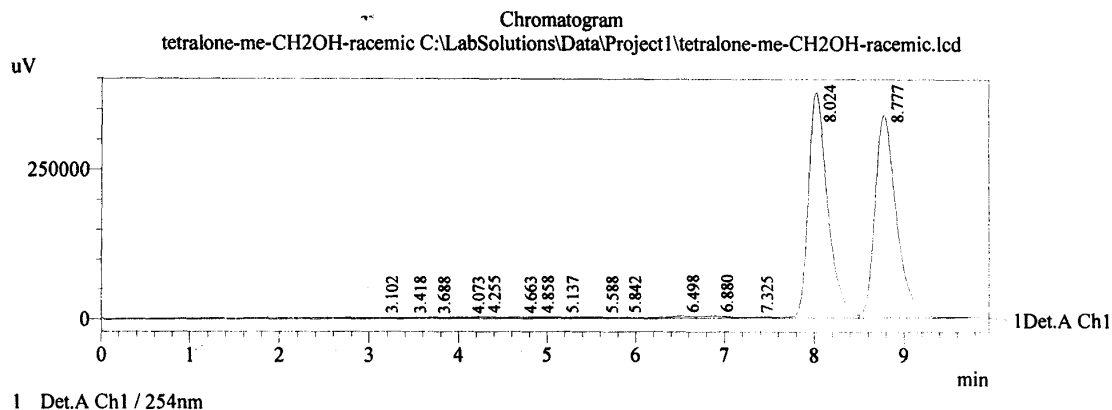

PeakTable

| Peak# | Ret. Time | Area     | Height | Area %  | Height % |
|-------|-----------|----------|--------|---------|----------|
| 1     | 3.102     | 184600   | 1421   | 1.561   | 0.193    |
| 2     | 3.418     | 17959    | 1278   | 0.152   | 0.173    |
| 3     | 3.688     | 17005    | 1316   | 0.144   | 0.179    |
| 4     | 4.073     | 30087    | 1470   | 0.254   | 0.199    |
| 5     | 4.255     | 35428    | 2398   | 0.300   | 0.325    |
| 6     | 4.663     | 21817    | 1519   | 0.185   | 0.206    |
| 7     | 4.858     | 19749    | 1466   | 0.167   | 0.199    |
| 8     | 5.137     | 27106    | 1511   | 0.229   | 0.205    |
| 9     | 5.588     | 37566    | 1453   | 0.318   | 0.197    |
| 10    | 5.842     | 19553    | 1411   | 0.165   | 0.192    |
| 11    | 6.498     | 71566    | 3533   | 0.605   | 0.480    |
| 12    | 6.880     | 71525    | 3092   | 0.605   | 0.420    |
| 13    | 7.325     | 11699    | 1050   | 0.099   | 0.143    |
| 14    | 8.024     | 5623002  | 376092 | 47.562  | 51.052   |
| 15    | 8.777     | 5633781  | 337681 | 47.653  | 45.838   |
| Total |           | 11822441 | 736691 | 100.000 | 100.000  |

## HPLC chromatogram of (S)- 1

### Department of Chemistry, IIT-Kharagpur

#### Sample Information

Acquired by : Admin  
Sample Name : tetralone-me-ch2OH-deprotection-lipase-OJH  
Sample ID : transesterification  
Vial# :  
Injection Volume : 5 uL  
Data Filename : tetralone-me-ch2OH-deprotection-lipase-OJH.lcd  
Method Filename : adduct1.lcm  
Batch Filename :  
Report Filename : Default.lcr  
Date Acquired : 5/4/2009 4:27:33 PM  
Data Processed : 5/4/2009 4:39:28 PM

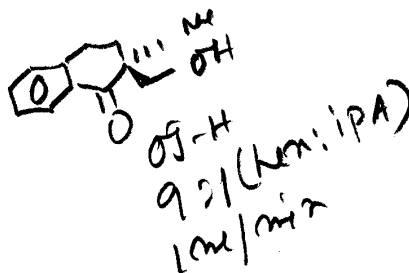

#### Chromatogram

tetralone-me-ch2OH-deprotection-lipase-OJH C:\LabSolutions\Data\Project1\tetralone-me-ch2OH-deprotection-lipase-OJH.lcd

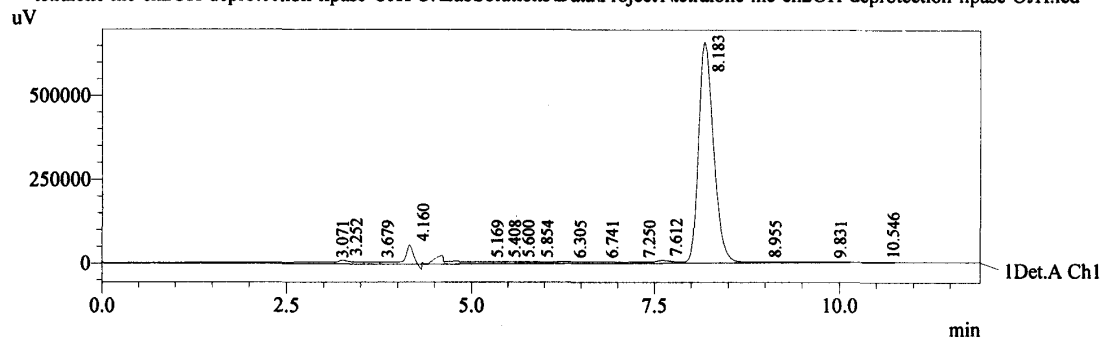

1 Det.A Ch1 / 254nm

#### PeakTable

Detector A Ch1 254nm

| Peak# | Ret. Time | Area     | Height | Area %  | Height % |
|-------|-----------|----------|--------|---------|----------|
| 1     | 3.071     | 453356   | 4451   | 3.899   | 0.573    |
| 2     | 3.252     | 156010   | 10793  | 1.342   | 1.390    |
| 3     | 3.679     | 62813    | 4944   | 0.540   | 0.637    |
| 4     | 4.160     | 418146   | 55507  | 3.596   | 7.151    |
| 5     | 5.169     | 445196   | 5558   | 3.829   | 0.716    |
| 6     | 5.408     | 49058    | 5145   | 0.422   | 0.663    |
| 7     | 5.600     | 74754    | 4986   | 0.643   | 0.642    |
| 8     | 5.854     | 81433    | 4753   | 0.700   | 0.612    |
| 9     | 6.305     | 137945   | 4775   | 1.186   | 0.615    |
| 10    | 6.741     | 114132   | 4402   | 0.982   | 0.567    |
| 11    | 7.250     | 66711    | 3239   | 0.574   | 0.417    |
| 12    | 7.612     | 154494   | 8209   | 1.329   | 1.058    |
| 13    | 8.183     | 9407646  | 659167 | 80.915  | 84.921   |
| 14    | 8.955     | 1403     | 45     | 0.012   | 0.006    |
| 15    | 9.831     | 1938     | 114    | 0.017   | 0.015    |
| 16    | 10.546    | 1561     | 122    | 0.013   | 0.016    |
| Total |           | 11626597 | 776210 | 100.000 | 100.000  |

## HPLC chromatogram of acetate derivative of racemic 1

Department of Chemistry, IIT-Kharagpur

### Sample Information

Acquired by : Admin  
Sample Name : tetralone-me-CH2OAc-racemic  
Sample ID : transesterification  
Vial# :  
Injection Volume : 5 uL  
Data Filename : tetralone-me-CH2OAc-racemic.lcd  
Method Filename : adduct1.lcm  
Batch Filename :  
Report Filename : Default.lcr  
Date Acquired : 10/29/2008 4:04:59 PM  
Data Processed : 10/29/2008 4:11:42 PM

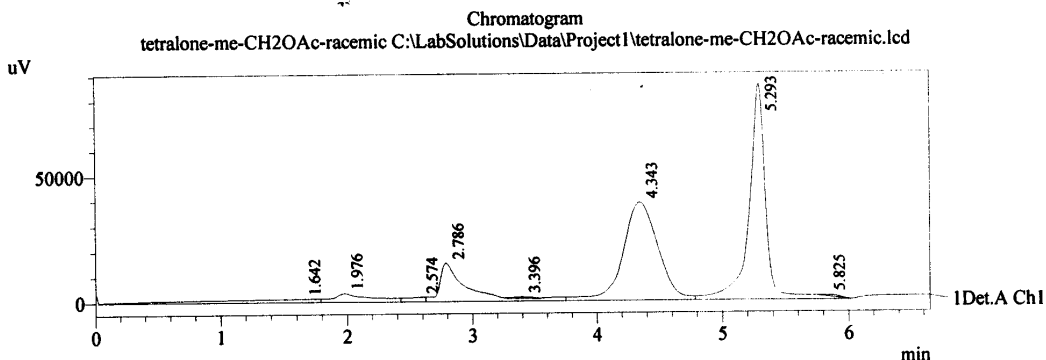

### PeakTable

Detector A Ch1 254nm

| Peak# | Ret. Time | Area    | Height | Area %  | Height % |
|-------|-----------|---------|--------|---------|----------|
| 1     | 1.642     | 80789   | 1172   | 4.127   | 0.799    |
| 2     | 1.976     | 70669   | 3357   | 3.610   | 2.289    |
| 3     | 2.574     | 18210   | 1637   | 0.930   | 1.116    |
| 4     | 2.786     | 239421  | 15161  | 12.232  | 10.337   |
| 5     | 3.396     | 4177    | 457    | 0.213   | 0.312    |
| 6     | 4.343     | 751793  | 38695  | 38.409  | 26.383   |
| 7     | 5.293     | 787501  | 85820  | 40.233  | 58.513   |
| 8     | 5.825     | 4794    | 368    | 0.245   | 0.251    |
| Total |           | 1957353 | 146668 | 100.000 | 100.000  |

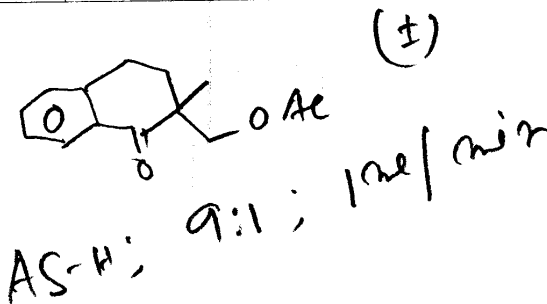

## HPLC chromatogram of (*R*)-acetate derivative of 1

Department of Chemistry, IIT-Kharagpur

Sample Information

Acquired by : Admin  
Sample Name : tetralone-me-CH<sub>2</sub>OAc-AKL  
Sample ID : transesterification  
Vial# :  
Injection Volume : 5  $\mu$ L  
Data Filename : tetralone-me-CH<sub>2</sub>OAc-AKL.lcd  
Method Filename : adduct1.lcm  
Batch Filename :  
Report Filename : Default.lcr  
Date Acquired : 10/29/2008 4:31:24 PM  
Data Processed : 10/29/2008 4:54:25 PM

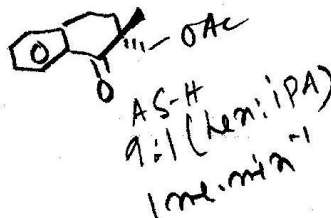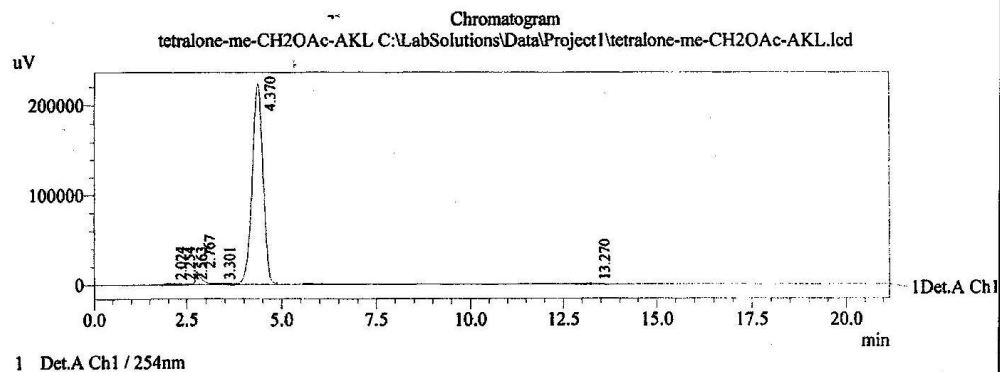



# HPLC chromatogram of acetate derivative of racemic 2

Department of Chemistry, IIT-Kharagpur

Sample Information  
Acquired by : Admin  
Sample Name : 5-OMetetalone-me-ch2OAc-racemic-OJH  
Sample ID : transesterification  
Vial# :  
Injection Volume : 5 uL  
Data Filename : 5-OMetetalone-me-ch2OAc-racemic-OJH.lcd  
Method Filename : adduct1.lcm  
Batch Filename :  
Report Filename : Default.lcr  
Date Acquired : 5/11/2009 3:18:45 PM  
Data Processed : 5/11/2009 3:37:21 PM

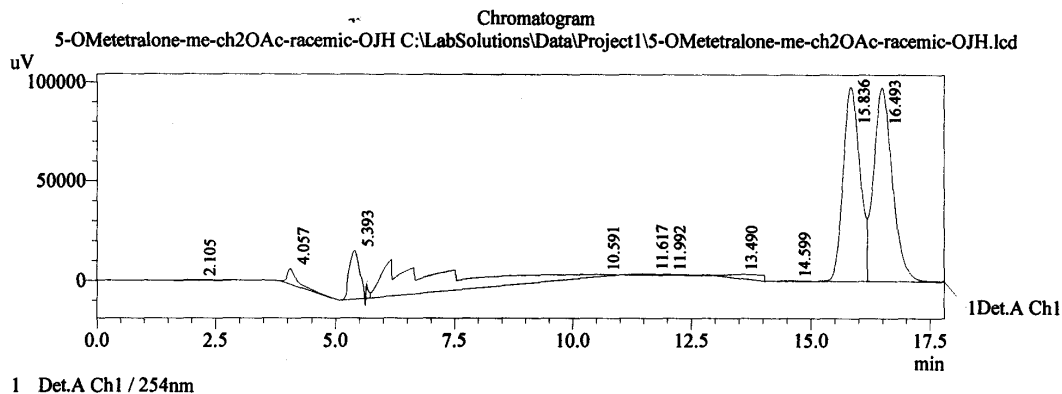

PeakTable

| Peak# | Ret. Time | Area    | Height | Area %  | Height % |
|-------|-----------|---------|--------|---------|----------|
| 1     | 2.105     | 8711    | 266    | 0.118   | 0.115    |
| 2     | 4.057     | 105547  | 7782   | 1.426   | 3.363    |
| 3     | 5.393     | 384721  | 24258  | 5.199   | 10.483   |
| 4     | 10.591    | 1694525 | 816    | 22.901  | 0.352    |
| 5     | 11.617    | 13998   | 460    | 0.189   | 0.199    |
| 6     | 11.992    | 8095    | 280    | 0.109   | 0.121    |
| 7     | 13.490    | 107142  | 1851   | 1.448   | 0.800    |
| 8     | 14.599    | 1806    | 83     | 0.024   | 0.036    |
| 9     | 15.836    | 2392447 | 97998  | 32.333  | 42.350   |
| 10    | 16.493    | 2682330 | 97609  | 36.251  | 42.182   |
| Total |           | 7399322 | 231402 | 100.000 | 100.000  |

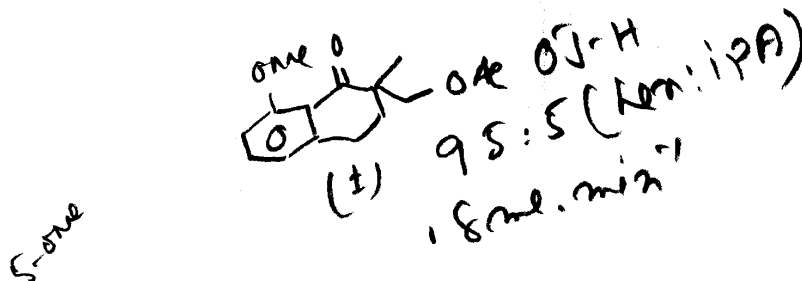

# HPLC chromatogram of (R)-acetate derivative of 2

Department of Chemistry, IIT-Kharagpur

Sample Information  
Acquired by : Admin  
Sample Name : 5-OMetetalone-me-ch2OAc-AKL-OJH  
Sample ID : transesterification  
Vail# :  
Injection Volume : 5 uL  
Data Filename : 5-OMetetalone-me-ch2OAc-AKL-OJH.lcd  
Method Filename : adduct1.lcm  
Batch Filename :  
Report Filename : Default.lcr  
Date Acquired : 5/11/2009 3:39:38 PM  
Data Processed : 5/11/2009 3:58:23 PM

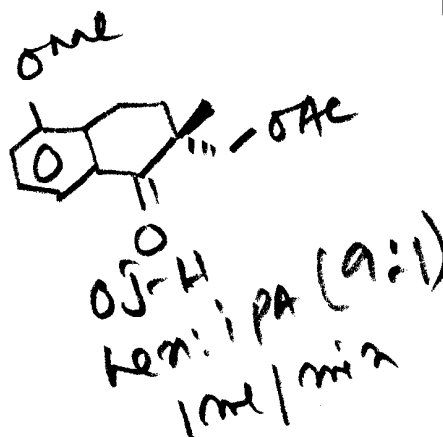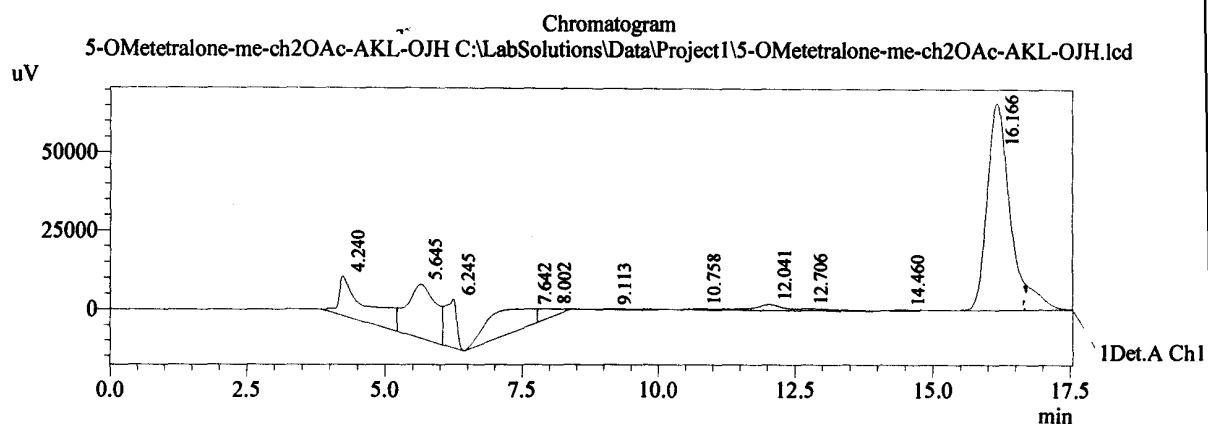

Detector A Ch1 254nm

PeakTable

| Peak# | Ret. Time | Area    | Height | Area %  | Height % |
|-------|-----------|---------|--------|---------|----------|
| 1     | 4.240     | 453496  | 12399  | 11.631  | 10.179   |
| 2     | 5.645     | 633500  | 17077  | 16.248  | 14.019   |
| 3     | 6.245     | 224736  | 15555  | 5.764   | 12.769   |
| 4     | 7.642     | 446486  | 5130   | 11.452  | 4.211    |
| 5     | 8.002     | 74632   | 2668   | 1.914   | 2.191    |
| 6     | 9.113     | 4007    | 138    | 0.103   | 0.113    |
| 7     | 10.758    | 7499    | 228    | 0.192   | 0.187    |
| 8     | 12.041    | 58059   | 1699   | 1.489   | 1.395    |
| 9     | 12.706    | 21604   | 524    | 0.554   | 0.430    |
| 10    | 14.460    | 4443    | 231    | 0.114   | 0.190    |
| 11    | 16.166    | 1970427 | 66165  | 50.538  | 54.317   |
| Total |           | 3898890 | 121814 | 100.000 | 100.000  |

## HPLC chromatogram of racemic 3

### Department of Chemistry, IIT-Kharagpur

Sample Information

Acquired by : Admin  
Sample Name : 6-OMe-tetralone-Me-CH<sub>2</sub>OH-racemic-OJH  
Sample ID : transesterification  
Vial# :  
Injection Volume : 5 µL  
Data Filename : 6-OMe-tetralone-Me-CH<sub>2</sub>OH-racemic-OJH.lcd  
Method Filename : adduct1.lcm  
Batch Filename :  
Report Filename : Default.lcr  
Date Acquired : 7/8/2009 8:46:24 AM  
Data Processed : 7/8/2009 9:02:35 AM

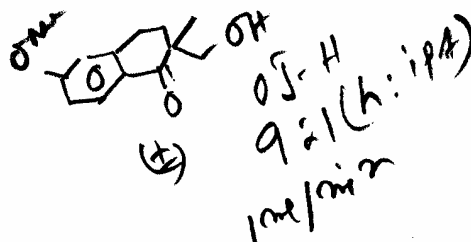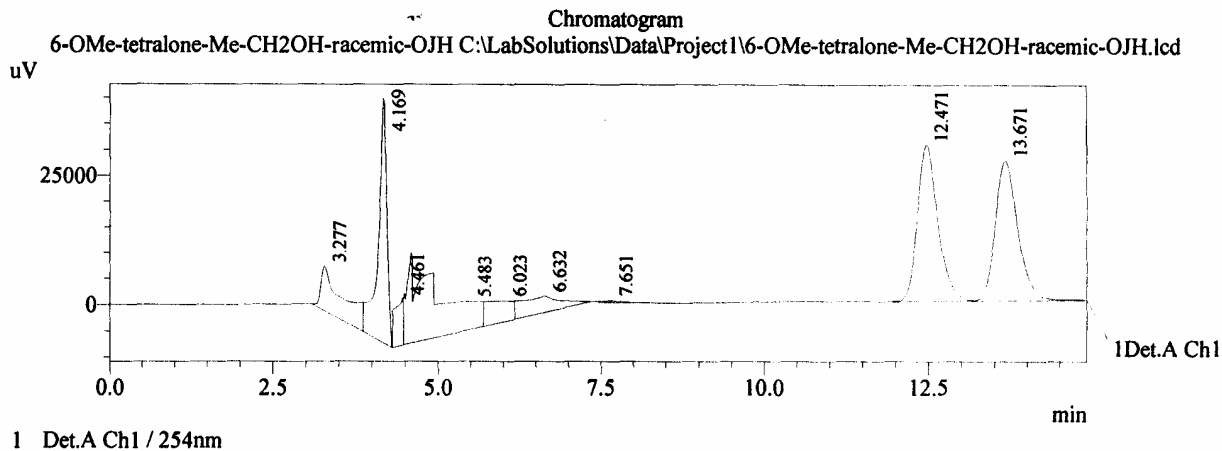

PeakTable

Detector A Ch1 254nm

| Peak# | Ret. Time | Area    | Height | Area %  | Height % |
|-------|-----------|---------|--------|---------|----------|
| 1     | 3.277     | 203172  | 8464   | 7.134   | 6.289    |
| 2     | 4.169     | 426918  | 47140  | 14.990  | 35.026   |
| 3     | 4.461     | 77876   | 9001   | 2.734   | 6.688    |
| 4     | 5.483     | 581109  | 5301   | 20.404  | 3.939    |
| 5     | 6.023     | 118640  | 3887   | 4.166   | 2.888    |
| 6     | 6.632     | 136762  | 3117   | 4.802   | 2.316    |
| 7     | 7.651     | 3114    | 249    | 0.109   | 0.185    |
| 8     | 12.471    | 652369  | 30337  | 22.906  | 22.540   |
| 9     | 13.671    | 648045  | 27092  | 22.754  | 20.130   |
| Total |           | 2848005 | 134588 | 100.000 | 100.000  |

# HPLC chromatogram of (S)-3

## Department of Chemistry, IIT-Kharagpur

Sample Information  
Acquired by : Admin  
Sample Name : 5-OMe-indanone-Me-CH2OAc-AKL-OJH  
Sample ID : transesterification  
Vail# :  
Injection Volume : 5 uL  
Data Filename : 5-OMe-indanone-Me-CH2OAc-AKL-OJH.lcd  
Method Filename : adduct1.lcm  
Batch Filename :  
Report Filename : Default.lcr  
Date Acquired : 8/7/2009 3:27:37 PM  
Data Processed : 8/7/2009 3:44:06 PM

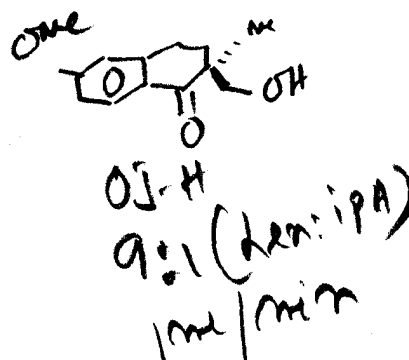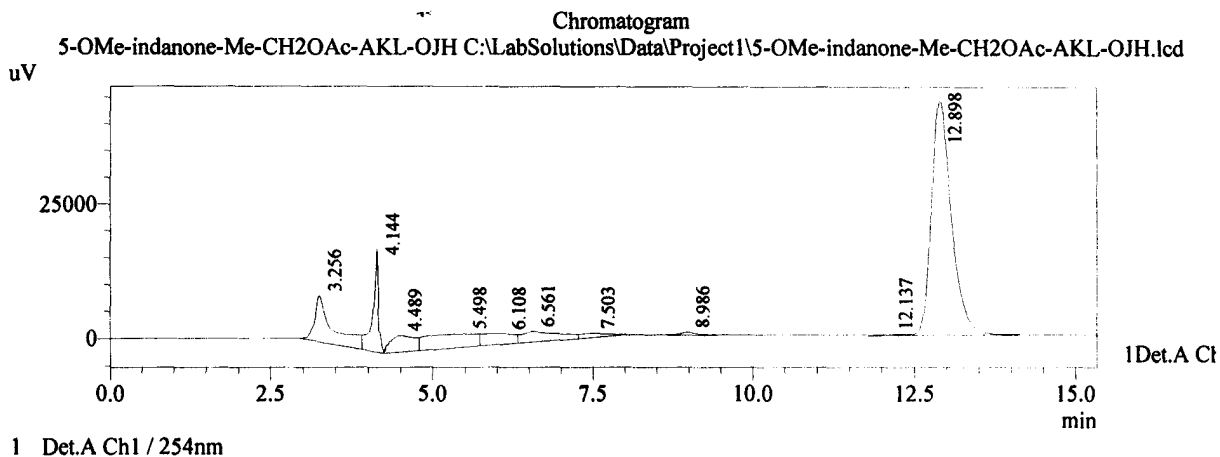

PeakTable

Detector A Ch1 254nm

| Peak# | Ret. Time | Area    | Height | Area %  | Height % |
|-------|-----------|---------|--------|---------|----------|
| 1     | 3.256     | 162498  | 8447   | 10.172  | 10.338   |
| 2     | 4.144     | 109528  | 19096  | 6.856   | 23.371   |
| 3     | 4.489     | 77146   | 2947   | 4.829   | 3.607    |
| 4     | 5.498     | 136804  | 2363   | 8.564   | 2.893    |
| 5     | 6.108     | 66803   | 1858   | 4.182   | 2.274    |
| 6     | 6.561     | 75401   | 1909   | 4.720   | 2.337    |
| 7     | 7.503     | 19715   | 719    | 1.234   | 0.881    |
| 8     | 8.986     | 7851    | 450    | 0.491   | 0.551    |
| 9     | 12.137    | 3239    | 163    | 0.203   | 0.200    |
| 10    | 12.898    | 938480  | 43752  | 58.748  | 53.549   |
| Total |           | 1597464 | 81705  | 100.000 | 100.000  |

## HPLC chromatogram of racemic 4

Department of Chemistry, IIT-Kharagpur

### Sample Information

Acquired by : Admin  
Sample Name : 1-tetralone-Et-CH<sub>2</sub>OH-racemic-OJH  
Sample ID : transesterification  
Vial# :  
Injection Volume : 5 uL  
Data Filename : 1-tetralone-Et-CH<sub>2</sub>OH-racemic-OJH.lcd  
Method Filename : adduct1.lcm  
Batch Filename :  
Report Filename : Default.lcr  
Date Acquired : 1/1/2010 2:27:08 PM  
Data Processed : 1/1/2010 2:41:17 PM

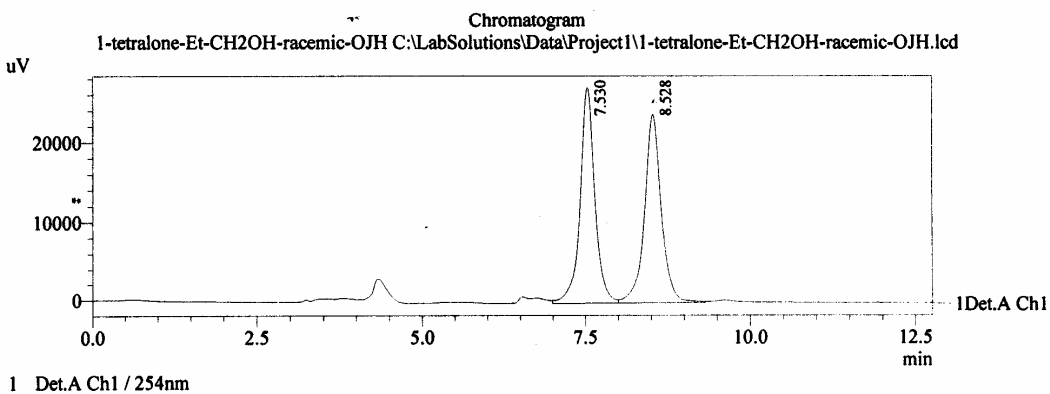

### PeakTable

Detector A Ch1 254nm

| Peak# | Ret. Time | Area   | Height | Area %  | Height % |
|-------|-----------|--------|--------|---------|----------|
| 1     | 7.530     | 429843 | 27266  | 50.076  | 53.325   |
| 2     | 8.528     | 428539 | 23866  | 49.924  | 46.675   |
| Total |           | 858382 | 51132  | 100.000 | 100.000  |

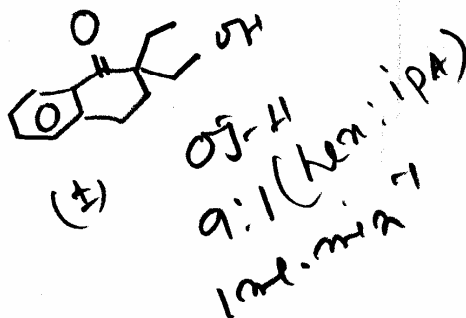

## HPLC chromatogram of (S)-4

### Department of Chemistry, IIT-Kharagpur

Sample Information  
Acquired by : Admin  
Sample Name : 1-tetralone-Et-CH<sub>2</sub>OH-PS-OJH  
Sample ID : transesterification  
Vial# :  
Injection Volume : 5 µL  
Data Filename : 1-tetralone-Et-CH<sub>2</sub>OH-PS-OJH.lcd  
Method Filename : adduct1.lcm  
Batch Filename :  
Report Filename : Default.lcr  
Date Acquired : 1/1/2010 2:45:22 PM  
Data Processed : 1/1/2010 2:54:53 PM

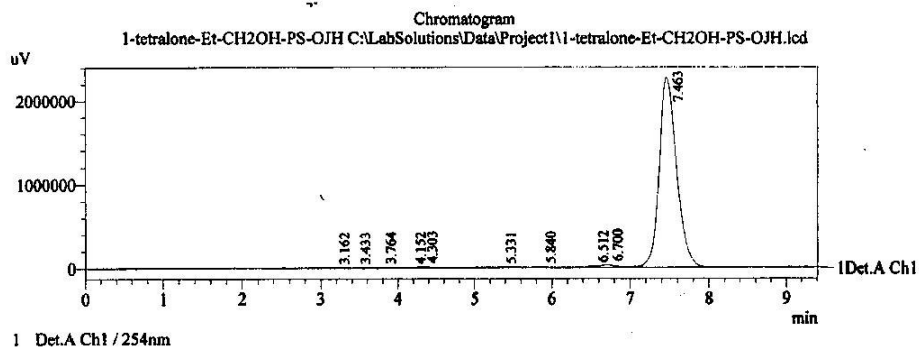

PeakTable

| Peak# | Ret. Time | Area     | Height  | Area %  | Height % |
|-------|-----------|----------|---------|---------|----------|
| 1     | 3.162     | 56461    | 479     | 0.130   | 0.017    |
| 2     | 3.433     | 16735    | 1531    | 0.039   | 0.054    |
| 3     | 3.764     | 66896    | 4522    | 0.154   | 0.160    |
| 4     | 4.152     | 55366    | 6137    | 0.128   | 0.218    |
| 5     | 4.303     | 188948   | 17798   | 0.436   | 0.631    |
| 6     | 5.331     | 158619   | 4021    | 0.366   | 0.143    |
| 7     | 5.840     | 143157   | 5389    | 0.330   | 0.191    |
| 8     | 6.512     | 187974   | 16850   | 0.434   | 0.597    |
| 9     | 6.700     | 427359   | 32258   | 0.986   | 1.143    |
| 10    | 7.463     | 34611897 | 2272201 | 79.892  | 80.541   |
| 11    | 8.446     | 7409752  | 460000  | 17.103  | 16.305   |
| Total |           | 43323163 | 2821187 | 100.000 | 100.000  |

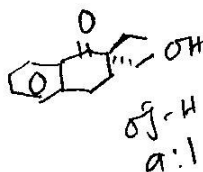

# HPLC chromatogram of acetate derivative of racemic 5

Department of Chemistry, IIT-Kharagpur

Acquired by : Admin  
Sample Name : 5,8dimethoxy  
Sample ID : monohydroxylation  
Vial# :  
Injection Volume : 10 uL  
Data Filename : 5,8dimethoxy.lcd  
Method Filename : tetralone 6 methoxy.lcm  
Batch Filename :  
Report Filename : Default.lcr  
Date Acquired : 12/27/2007 10:07:22 AM  
Data Processed : 12/27/2007 11:07:25 AM

## Sample Information

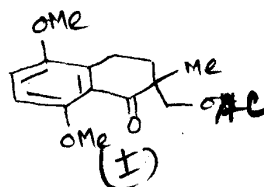

Flow rate = 1 ml/min  
0.5-H  
9:1 (Hex: IPA)

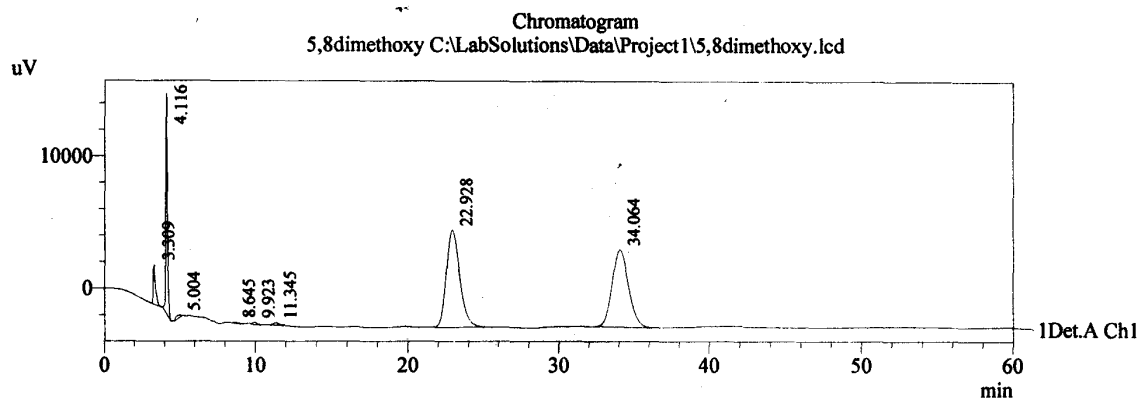

1 Det.A Ch1 / 254nm

## PeakTable

Detector A Ch1 254nm

| Peak# | Ret. Time | Area    | Height | Area %  | Height % |
|-------|-----------|---------|--------|---------|----------|
| 1     | 3.309     | 30978   | 2988   | 2.929   | 8.977    |
| 2     | 4.116     | 125674  | 16631  | 11.882  | 49.959   |
| 3     | 5.004     | 4372    | 145    | 0.413   | 0.437    |
| 4     | 8.645     | 1040    | 69     | 0.098   | 0.208    |
| 5     | 9.923     | 2502    | 146    | 0.237   | 0.437    |
| 6     | 11.345    | 3637    | 165    | 0.344   | 0.496    |
| 7     | 22.928    | 453015  | 7332   | 42.832  | 22.027   |
| 8     | 34.064    | 436429  | 5812   | 41.264  | 17.459   |
| Total |           | 1057647 | 33289  | 100.000 | 100.000  |

# HPLC chromatogram of (R)-acetate derivative of 5

## Department of Chemistry, IIT-Kharagpur

Sample Information

Acquired by : Admin  
Sample Name : methylenedioxi-chromanone-me-acetate-PSL  
Sample ID : transesterification  
Vail# :  
Injection Volume : 10 uL  
Data Filename : methylenedioxi-chromanone-me-acetate-PSL.lcd  
Method Filename : tetralone 6 methoxy.lcm  
Batch Filename :  
Report Filename : Default.lcr  
Date Acquired : 1/29/2008 4:01:59 PM  
Data Processed : 1/29/2008 4:34:10 PM

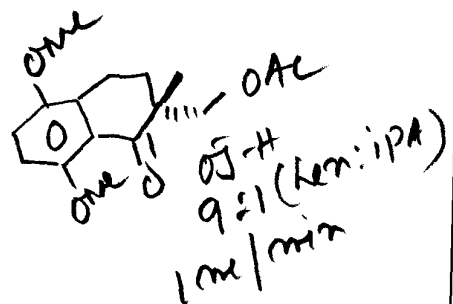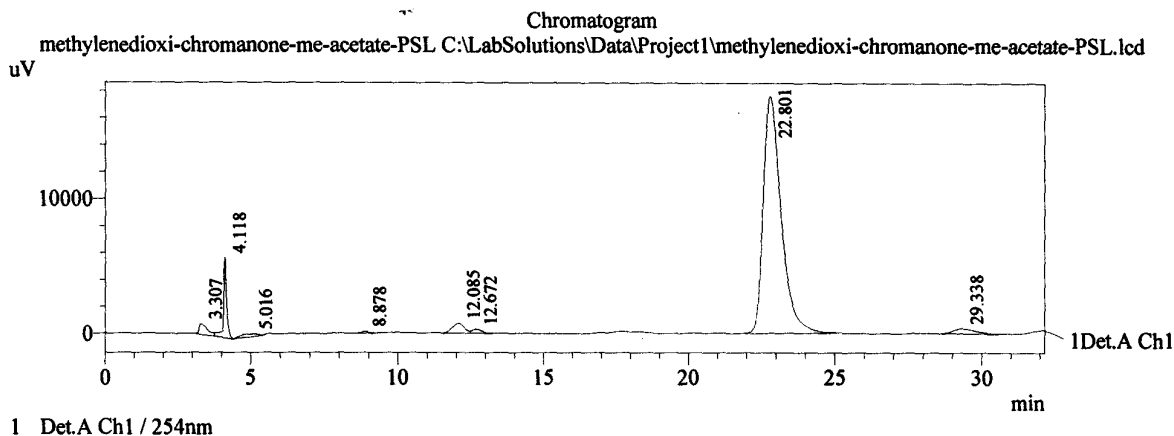

PeakTable

Detector A Ch1 254nm

| Peak# | Ret. Time | Area   | Height | Area %  | Height % |
|-------|-----------|--------|--------|---------|----------|
| 1     | 3.307     | 15194  | 793    | 1.762   | 3.048    |
| 2     | 4.118     | 44067  | 5991   | 5.111   | 23.041   |
| 3     | 5.016     | 7960   | 196    | 0.923   | 0.755    |
| 4     | 8.878     | 1591   | 113    | 0.185   | 0.434    |
| 5     | 12.085    | 19251  | 686    | 2.233   | 2.640    |
| 6     | 12.672    | 6270   | 277    | 0.727   | 1.064    |
| 7     | 22.801    | 749790 | 17577  | 86.956  | 67.599   |
| 8     | 29.338    | 18139  | 369    | 2.104   | 1.418    |
| Total |           | 862263 | 26002  | 100.000 | 100.000  |



HPLC chromatogram of racemic 6

IIT

Sample Information  
Acquired by : Admin  
Sample Name : indanone-me  
Sample ID : monohydroxylation  
Vial# :  
Injection Volume : 10 uL  
Data Filename : indanone-me.lcd  
Method Filename : tetralone 6 methoxy.lcm  
Batch Filename :  
Report Filename : Default.lcr  
Date Acquired : 12/27/2007 11:20:49 AM  
Data Processed : 12/27/2007 11:37:12 AM

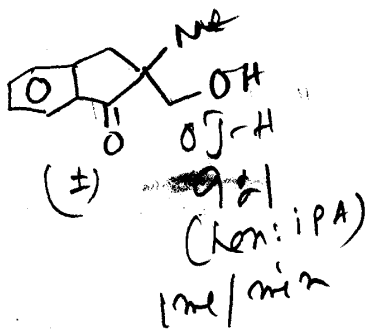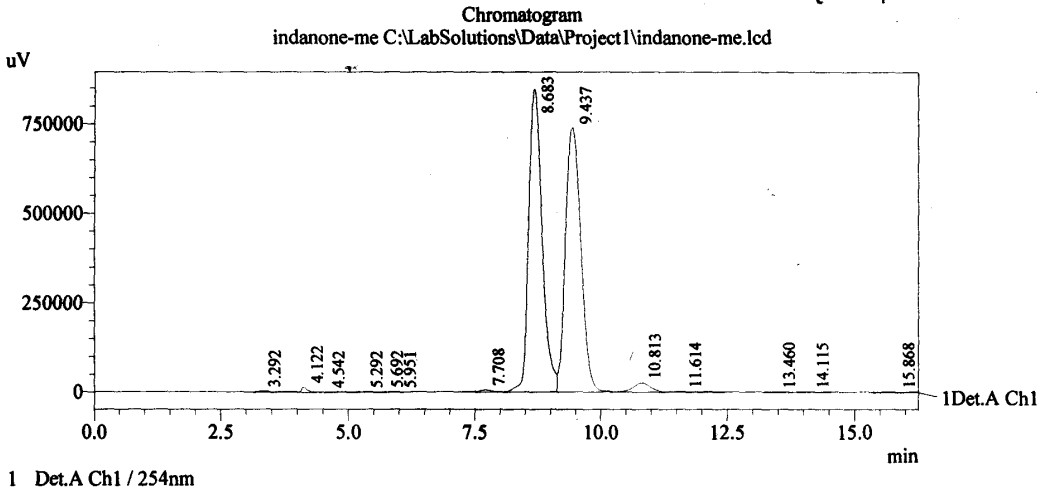

PeakTable

Detector A Ch1 254nm

| Peak# | Ret. Time | Area     | Height  | Area %  | Height % |
|-------|-----------|----------|---------|---------|----------|
| 1     | 3.292     | 31560    | 1972    | 0.097   | 0.121    |
| 2     | 4.122     | 105063   | 13987   | 0.323   | 0.855    |
| 3     | 4.542     | 1018     | 127     | 0.003   | 0.008    |
| 4     | 5.292     | 17390    | 321     | 0.053   | 0.020    |
| 5     | 5.692     | 3399     | 172     | 0.010   | 0.011    |
| 6     | 5.951     | 1396     | 98      | 0.004   | 0.006    |
| 7     | 7.708     | 89095    | 5790    | 0.274   | 0.354    |
| 8     | 8.683     | 15800321 | 846864  | 48.564  | 51.775   |
| 9     | 9.437     | 15833492 | 739433  | 48.666  | 45.207   |
| 10    | 10.813    | 606331   | 25340   | 1.864   | 1.549    |
| 11    | 11.614    | 38819    | 1256    | 0.119   | 0.077    |
| 12    | 13.460    | 1452     | 87      | 0.004   | 0.005    |
| 13    | 14.115    | 1303     | 68      | 0.004   | 0.004    |
| 14    | 15.868    | 4201     | 155     | 0.013   | 0.009    |
| Total |           | 32534839 | 1635668 | 100.000 | 100.000  |

# HPLC chromatogram of (S)-6

Department of Chemistry, IIT-Kharagpur

Sample Information

Acquired by : Admin  
Sample Name : 1-tetralone-me-acetate-PSL  
Sample ID : transesterification  
Vial# :  
Injection Volume : 5 uL  
Data Filename : 1-tetralone-me-acetate-PSL.lcd  
Method Filename : tetralone 6 methoxy.lcm  
Batch Filename :  
Report Filename : Default.lcr  
Date Acquired : 1/29/2008 10:14:06 AM  
Data Processed : 1/29/2008 10:26:36 AM

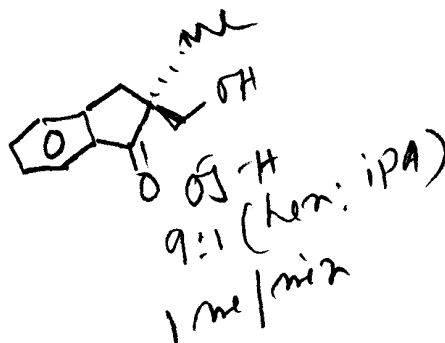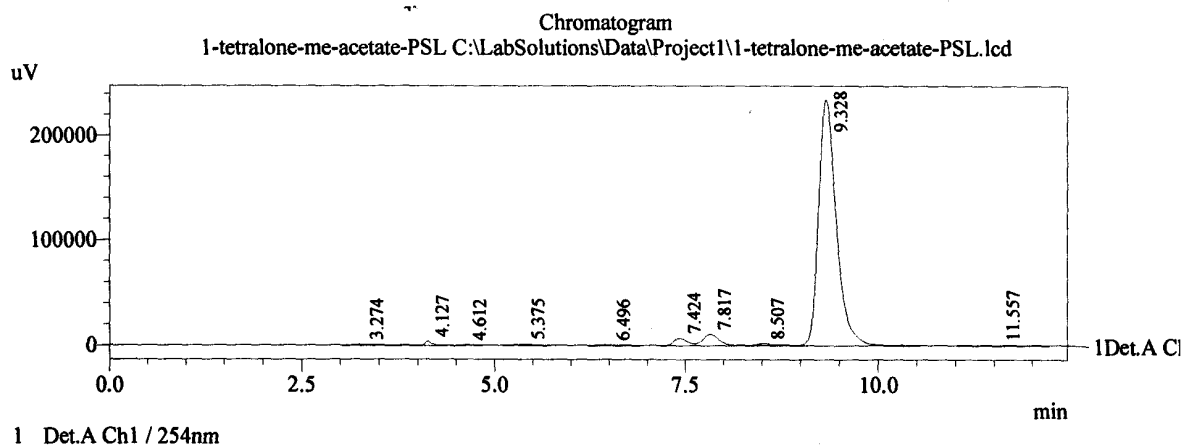

PeakTable

Detector A Ch1 254nm

| Peak# | Ret. Time | Area    | Height | Area %  | Height % |
|-------|-----------|---------|--------|---------|----------|
| 1     | 3.274     | 14889   | 789    | 0.368   | 0.304    |
| 2     | 4.127     | 27090   | 3781   | 0.670   | 1.456    |
| 3     | 4.612     | 4005    | 366    | 0.099   | 0.141    |
| 4     | 5.375     | 13165   | 1051   | 0.325   | 0.405    |
| 5     | 6.496     | 4154    | 324    | 0.103   | 0.125    |
| 6     | 7.424     | 80334   | 6799   | 1.986   | 2.618    |
| 7     | 7.817     | 151210  | 10516  | 3.739   | 4.049    |
| 8     | 8.507     | 27110   | 1411   | 0.670   | 0.543    |
| 9     | 9.328     | 3714698 | 234465 | 91.846  | 90.278   |
| 10    | 11.557    | 7823    | 213    | 0.193   | 0.082    |
| Total |           | 4044477 | 259714 | 100.000 | 100.000  |

# HPLC chromatogram of acetate derivative of racemic 6

Department of Chemistry, IIT-Kharagpur

Sample Information

Acquired by : Admin  
Sample Name : 1-indalone-me-acetate-racemic  
Sample ID : transesterification  
Vail# :  
Injection Volume : 5 uL  
Data Filename : 1-indalone-me-acetate-racemic.lcd  
Method Filename : tetralone 6 methoxy.lcm  
Batch Filename :  
Report Filename : Default.lcr  
Date Acquired : 1/29/2008 9:36:37 AM  
Data Processed : 1/29/2008 9:49:43 AM

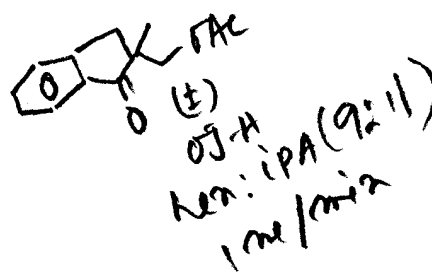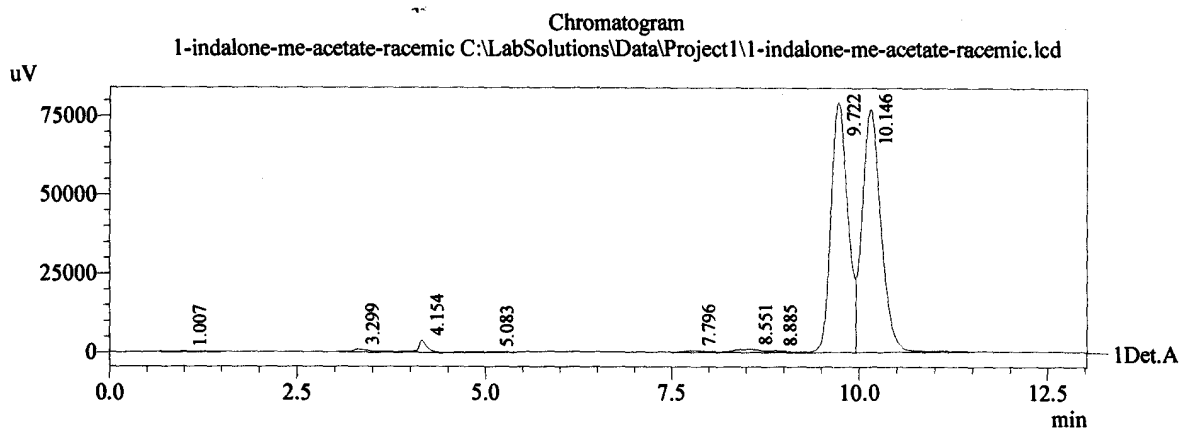

1 Det.A Ch1 / 254nm

PeakTable

Detector A Ch1 254nm

| Peak# | Ret. Time | Area    | Height | Area %  | Height % |
|-------|-----------|---------|--------|---------|----------|
| 1     | 1.007     | 1243    | 49     | 0.047   | 0.030    |
| 2     | 3.299     | 13950   | 821    | 0.525   | 0.503    |
| 3     | 4.154     | 29043   | 3802   | 1.094   | 2.330    |
| 4     | 5.083     | 4486    | 121    | 0.169   | 0.074    |
| 5     | 7.796     | 8572    | 464    | 0.323   | 0.284    |
| 6     | 8.551     | 21440   | 873    | 0.808   | 0.535    |
| 7     | 8.885     | 6999    | 443    | 0.264   | 0.271    |
| 8     | 9.722     | 1245254 | 79448  | 46.906  | 48.688   |
| 9     | 10.146    | 1323796 | 77155  | 49.865  | 47.283   |
| Total |           | 2654782 | 163176 | 100.000 | 100.000  |

11

# HPLC chromatogram of (R)-acetate derivative of 6

Department of Chemistry, IIT-Kharagpur

Sample Information

Acquired by : Admin  
Sample Name : 1-indalone-me-acetate-AKL  
Sample ID : transesterification  
Vail# :  
Injection Volume : 5 uL  
Data Filename : 1-indalone-me-acetate-AKL.lcd  
Method Filename : tetralone 6 methoxy.lcm  
Batch Filename :  
Report Filename : Default.lcr  
Date Acquired : 1/29/2008 9:52:50 AM  
Data Processed : 1/29/2008 10:10:42 AM

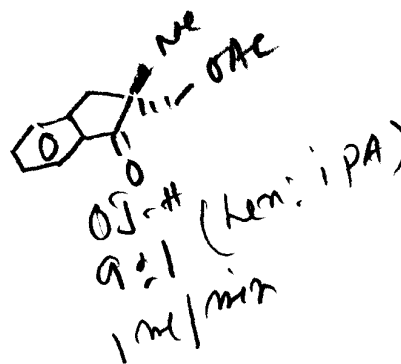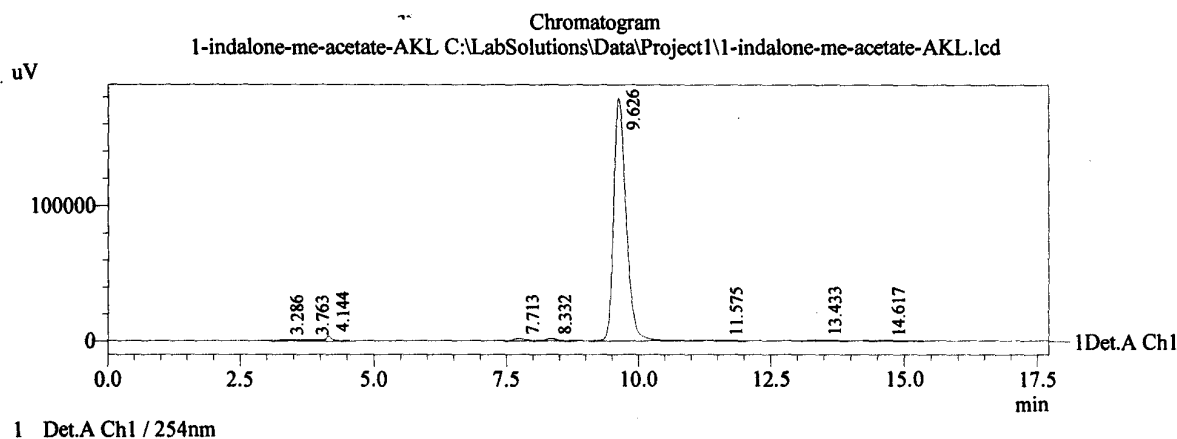

PeakTable

Detector A Ch1 254nm

| Peak# | Ret. Time | Area    | Height | Area %  | Height % |
|-------|-----------|---------|--------|---------|----------|
| 1     | 3.286     | 9421    | 686    | 0.308   | 0.364    |
| 2     | 3.763     | 26338   | 851    | 0.861   | 0.452    |
| 3     | 4.144     | 24782   | 3600   | 0.810   | 1.910    |
| 4     | 7.713     | 27594   | 1671   | 0.902   | 0.887    |
| 5     | 8.332     | 22101   | 1473   | 0.723   | 0.782    |
| 6     | 9.626     | 2926642 | 179156 | 95.693  | 95.069   |
| 7     | 11.575    | 2003    | 96     | 0.065   | 0.051    |
| 8     | 13.433    | 12160   | 615    | 0.398   | 0.326    |
| 9     | 14.617    | 7338    | 300    | 0.240   | 0.159    |
| Total |           | 3058378 | 188448 | 100.000 | 100.000  |

## HPLC chromatogram of racemic 7

Department of Chemistry, IIT-Kharagpur

Sample Information  
Acquired by : Admin  
Sample Name : 1-tetralone-me-acetate-racemic  
Sample ID : transesterification  
Vial# :  
Injection Volume : 5 uL  
Data Filename : 1-tetralone-me-acetate-racemic.lcd  
Method Filename : tetralone 6 methoxy.lcm  
Batch Filename :  
Report Filename : Default.lcr  
Date Acquired : 1/29/2008 9:17:40 AM  
Data Processed : 1/29/2008 9:32:52 AM

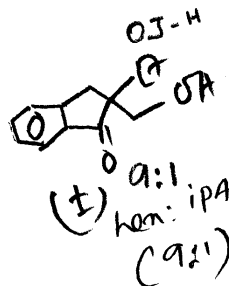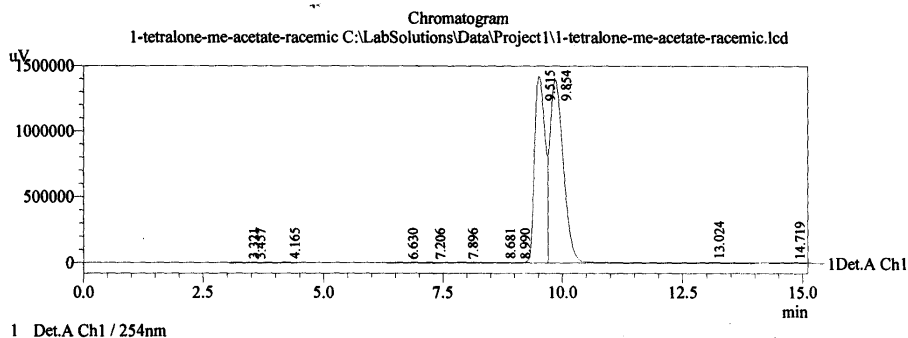

PeakTable  
Detector A Ch1 254nm

| Peak# | Ret. Time | Area     | Height  | Area %  | Height % |
|-------|-----------|----------|---------|---------|----------|
| 1     | 3.321     | 8722     | 795     | 0.018   | 0.028    |
| 2     | 3.457     | 8963     | 702     | 0.018   | 0.025    |
| 3     | 4.165     | 38407    | 4501    | 0.078   | 0.159    |
| 4     | 6.630     | 1753     | 150     | 0.004   | 0.005    |
| 5     | 7.206     | 6052     | 400     | 0.012   | 0.014    |
| 6     | 7.896     | 37576    | 1655    | 0.077   | 0.059    |
| 7     | 8.681     | 22488    | 1189    | 0.046   | 0.042    |
| 8     | 8.990     | 12338    | 891     | 0.025   | 0.032    |
| 9     | 9.515     | 21728734 | 1419635 | 44.270  | 50.256   |
| 10    | 9.854     | 27159401 | 1392355 | 55.334  | 49.290   |
| 11    | 13.024    | 36772    | 1518    | 0.075   | 0.054    |
| 12    | 14.719    | 21201    | 1042    | 0.043   | 0.037    |
| Total |           | 49082406 | 2824834 | 100.000 | 100.000  |

tr = 9.5 (ma)  
tr = 9.85 (mi)

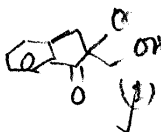

## HPLC chromatogram of (S)-7

Department of Chemistry, IIT-Kharagpur

Sample Information

Acquired by : Admin  
Sample Name : 1-indanone-Et-CH2OH-PSL-OJH  
Sample ID : transesterification  
Vial# :  
Injection Volume : 5 uL  
Data Filename : 1-indanone-Et-CH2OH-PSL-OJH.lcd  
Method Filename : adduct1.lcm  
Batch Filename :  
Report Filename : Default.lcr  
Date Acquired : 9/9/2009 9:56:27 AM  
Data Processed : 9/9/2009 10:08:43 AM

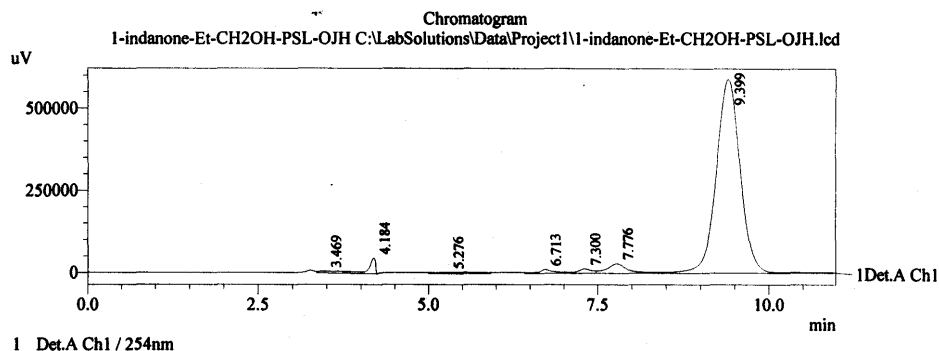

PeakTable

Detector A Ch1 254nm

| Peak# | Ret. Time | Area     | Height | Area %  | Height % |
|-------|-----------|----------|--------|---------|----------|
| 1     | 3.469     | 185329   | 5126   | 1.171   | 0.736    |
| 2     | 4.184     | 269826   | 46713  | 1.705   | 6.709    |
| 3     | 5.276     | 134963   | 2756   | 0.853   | 0.396    |
| 4     | 6.713     | 179870   | 11224  | 1.137   | 1.612    |
| 5     | 7.300     | 184051   | 12914  | 1.163   | 1.855    |
| 6     | 7.776     | 577626   | 28621  | 3.651   | 4.110    |
| 7     | 9.399     | 14289994 | 588962 | 90.319  | 84.583   |
| Total |           | 15821661 | 696315 | 100.000 | 100.000  |

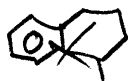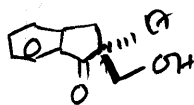

OS-4  
9.1  
1ml/min

# HPLC chromatogram of acetate derivative of racemic 8

## Department of Chemistry, IIT-Kharagpur

Sample Information

Acquired by : Admin  
Sample Name : 5-OMe-indanone-mono-CH2OH  
Sample ID : transesterification  
Vial# :  
Injection Volume : 10 uL  
Data Filename : 5-OMe-indanone-mono-CH2OH.lcd  
Method Filename : adduct1.lcm  
Batch Filename :  
Report Filename : Default.lcr  
Date Acquired : 4/14/2008 3:31:48 PM  
Data Processed : 4/14/2008 3:43:05 PM

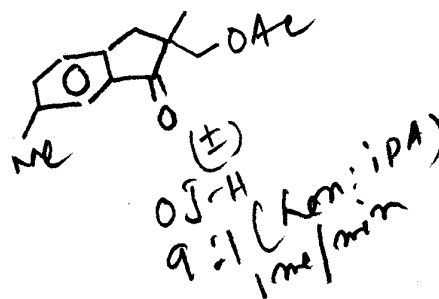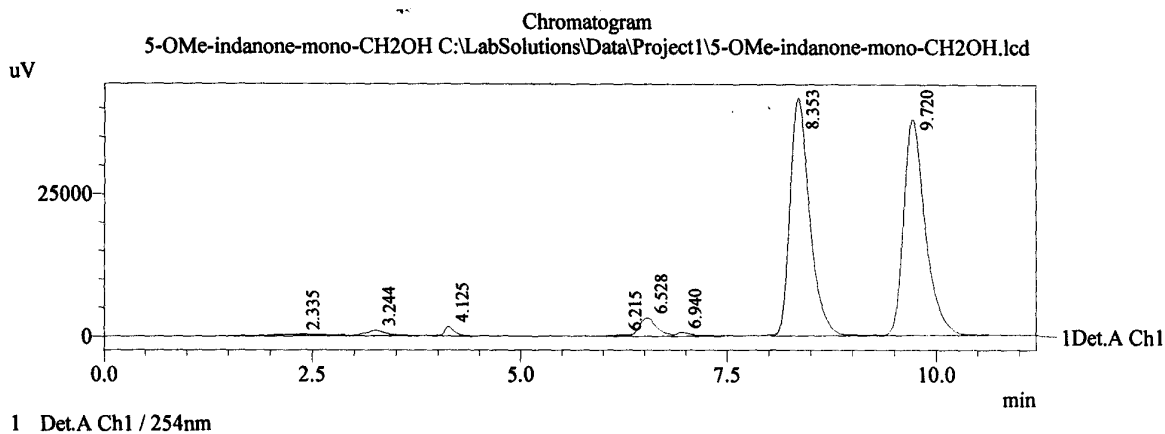

PeakTable

Detector A Ch1 254nm

| Peak# | Ret. Time | Area    | Height | Area %  | Height % |
|-------|-----------|---------|--------|---------|----------|
| 1     | 2.335     | 12773   | 262    | 0.876   | 0.304    |
| 2     | 3.244     | 14671   | 901    | 1.006   | 1.043    |
| 3     | 4.125     | 12409   | 1530   | 0.851   | 1.771    |
| 4     | 6.215     | 1935    | 201    | 0.133   | 0.232    |
| 5     | 6.528     | 45297   | 3125   | 3.106   | 3.618    |
| 6     | 6.940     | 7386    | 603    | 0.506   | 0.698    |
| 7     | 8.353     | 681134  | 41763  | 46.709  | 48.347   |
| 8     | 9.720     | 682651  | 37997  | 46.813  | 43.987   |
| Total |           | 1458258 | 86383  | 100.000 | 100.000  |

# HPLC chromatogram of (R)-acetate derivative of 8

Department of Chemistry, IIT-Kharagpur

## Sample Information

Acquired by : Admin  
Sample Name : indanone-Me-CH2OH-AK-OJH  
Sample ID : transesterification  
Vial# :  
Injection Volume : 5 uL  
Data Filename : indanone-Me-CH2OH-AK-OJH.lcd  
Method Filename : adduct1.lcm  
Batch Filename :  
Report Filename : Default.lcr  
Date Acquired : 1/1/2010 3:52:06 PM  
Data Processed : 1/1/2010 4:03:44 PM

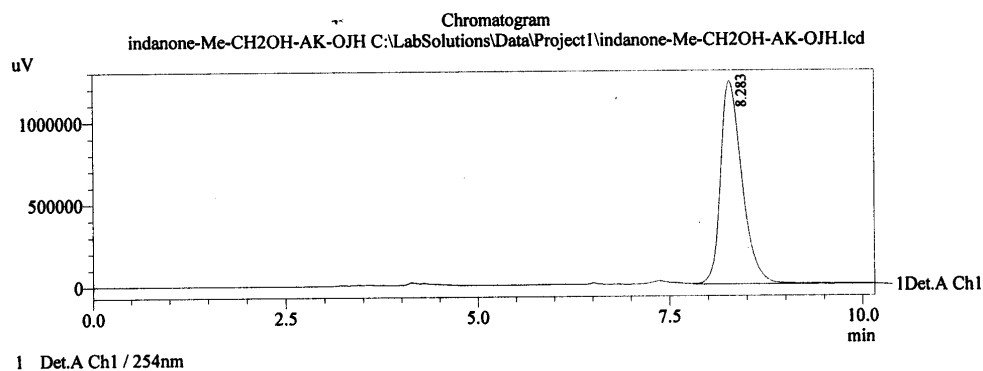

## PeakTable

Detector A Ch1 254nm

| Peak# | Ret. Time | Area     | Height  | Area %  | Height % |
|-------|-----------|----------|---------|---------|----------|
| 1     | 8.283     | 23712343 | 1231381 | 100.000 | 100.000  |
| Total |           | 23712343 | 1231381 | 100.000 | 100.000  |

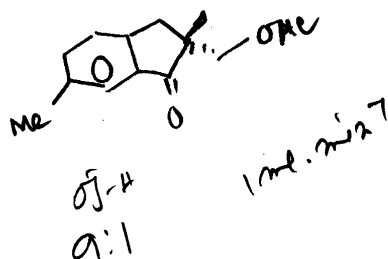



## HPLC chromatogram of racemic 9

Department of Chemistry, IIT-Kharagpur

Sample Information  
Acquired by : Admin  
Sample Name : 5-OMe-indanone-Me-CH2OH-racemic-ASH  
Sample ID : transesterification  
Vial# :  
Injection Volume : 5 uL  
Data Filename : 5-OMe-indanone-Me-CH2OH-racemic-ASH.lcd  
Method Filename : adduct1.lcm  
Batch Filename :  
Report Filename : Default.lcr  
Date Acquired : 5/29/2009 5:31:16 PM  
Data Processed : 5/29/2009 5:48:17 PM

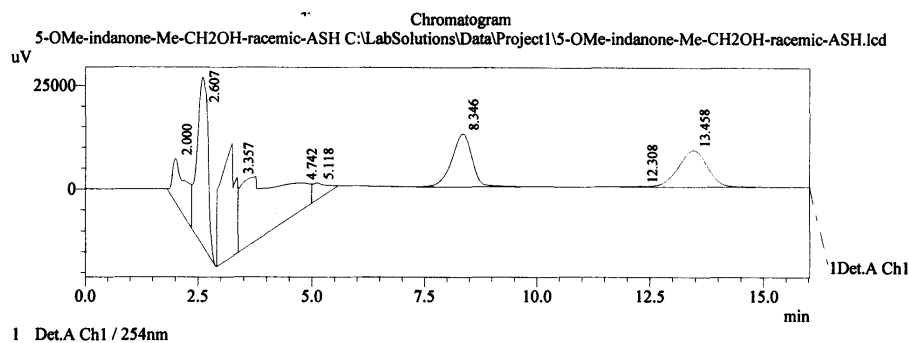

PeakTable

| Peak# | Ret. Time | Area    | Height | Area %  | Height % |
|-------|-----------|---------|--------|---------|----------|
| 1     | 2.000     | 240218  | 10422  | 7.122   | 10.305   |
| 2     | 2.607     | 672364  | 40561  | 19.935  | 40.105   |
| 3     | 3.357     | 583983  | 17981  | 17.314  | 17.778   |
| 4     | 4.742     | 1006837 | 6654   | 29.851  | 6.579    |
| 5     | 5.118     | 81842   | 3953   | 2.426   | 3.909    |
| 6     | 8.346     | 395977  | 12696  | 11.740  | 12.553   |
| 7     | 12.308    | 1745    | 83     | 0.052   | 0.082    |
| 8     | 13.458    | 389879  | 8788   | 11.559  | 8.689    |
| Total |           | 3372843 | 101138 | 100.000 | 100.000  |

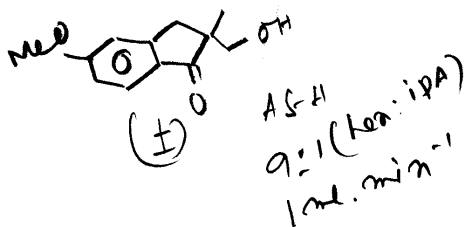

# HPLC chromatogram of (S)- 9

Department of Chemistry, IIT-Kharagpur

## Sample Information

Acquired by : Admin  
Sample Name : 1-indanone-Et-CH2OH-PSL-ASH  
Sample ID : transesterification  
Vial# :  
Injection Volume : 5 uL  
Data Filename : 1-indanone-Et-CH2OH-PSL-ASH.lcd  
Method Filename : adduct1.lcm  
Batch Filename :  
Report Filename : Default.lcr  
Date Acquired : 9/9/2009 10:29:06 AM  
Data Processed : 9/9/2009 10:43:45 AM

## Chromatogram

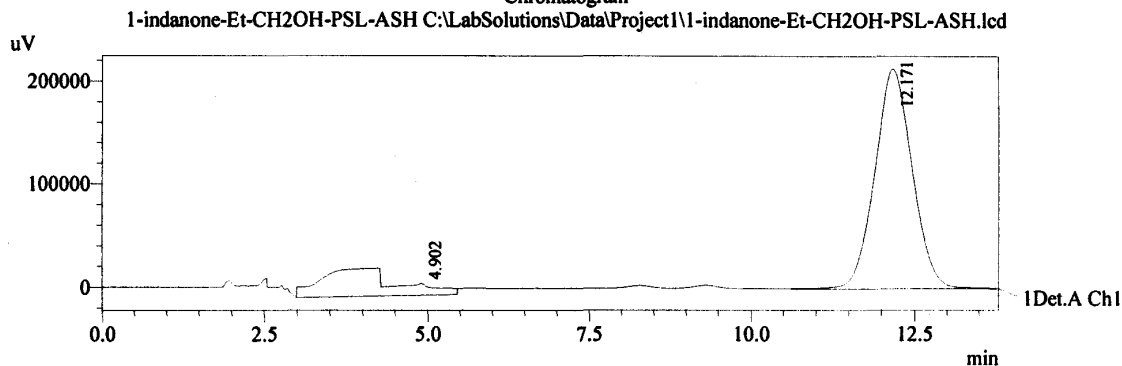

## PeakTable

Detector A Ch1 254nm

| Peak# | Ret. Time | Area     | Height | Area %  | Height % |
|-------|-----------|----------|--------|---------|----------|
| 1     | 4.902     | 2170868  | 10993  | 20.355  | 4.890    |
| 2     | 12.171    | 8494242  | 213820 | 79.645  | 95.110   |
| Total |           | 10665111 | 224813 | 100.000 | 100.000  |

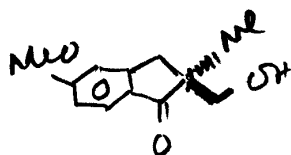

AS-H  
9:1  
1ml. mix<sup>-1</sup>

# HPLC chromatogram of acetate derivative of racemic 9

Department of Chemistry, IIT-Kharagpur

Sample Information  
Acquired by : Admin  
Sample Name : 5-OMe-indanone-Me-CH2OAc-racemic-OJH  
Sample ID : transesterification  
Vial# :  
Injection Volume : 5 uL  
Data Filename : 5-OMe-indanone-Me-CH2OAc-racemic-OJH.lcd  
Method Filename : adduct1.lcm  
Batch Filename :  
Report Filename : Default.lcr  
Date Acquired : 5/29/2009 5:03:55 PM  
Data Processed : 5/29/2009 5:20:16 PM

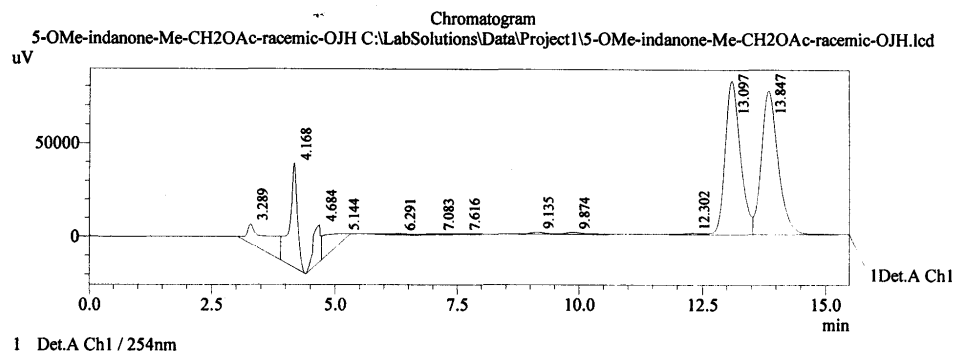

PeakTable

Detector A Ch1 254nm

| Peak# | Ret. Time | Area    | Height | Area %  | Height % |
|-------|-----------|---------|--------|---------|----------|
| 1     | 3.289     | 381973  | 10353  | 7.488   | 4.114    |
| 2     | 4.168     | 617046  | 55837  | 12.096  | 22.188   |
| 3     | 4.684     | 212638  | 19643  | 4.168   | 7.805    |
| 4     | 5.144     | 233761  | 3926   | 4.582   | 1.560    |
| 5     | 6.291     | 12871   | 444    | 0.252   | 0.176    |
| 6     | 7.083     | 8849    | 322    | 0.173   | 0.128    |
| 7     | 7.616     | 9327    | 282    | 0.183   | 0.112    |
| 8     | 9.135     | 18328   | 997    | 0.359   | 0.396    |
| 9     | 9.874     | 20065   | 955    | 0.393   | 0.379    |
| 10    | 12.302    | 14490   | 614    | 0.284   | 0.244    |
| 11    | 13.097    | 1762253 | 81761  | 34.544  | 32.489   |
| 12    | 13.847    | 1809822 | 76522  | 35.477  | 30.407   |
| Total |           | 5101423 | 251657 | 100.000 | 100.000  |

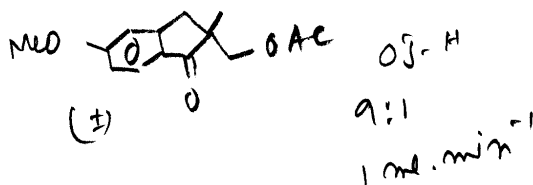

# HPLC chromatogram of (R)-acetate of 9

Department of Chemistry, IIT-Kharagpur

Sample Information  
Acquired by : Admin  
Sample Name : 6-OMe-tetralone-Me-CH2OH-PSL-OJH  
Sample ID : transesterification  
Vial# :  
Injection Volume : 5 uL  
Data Filename : 6-OMe-tetralone-Me-CH2OH-PSL-OJH.lcd  
Method Filename : adduct1.lcm  
Batch Filename :  
Report Filename : Default.lcr  
Date Acquired : 9/9/2009 9:37:15 AM  
Data Processed : 9/9/2009 9:54:04 AM

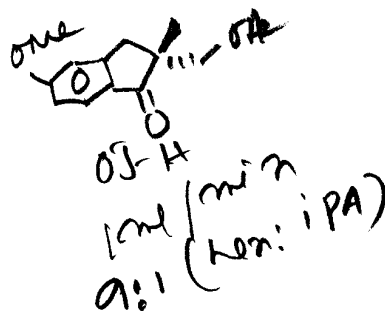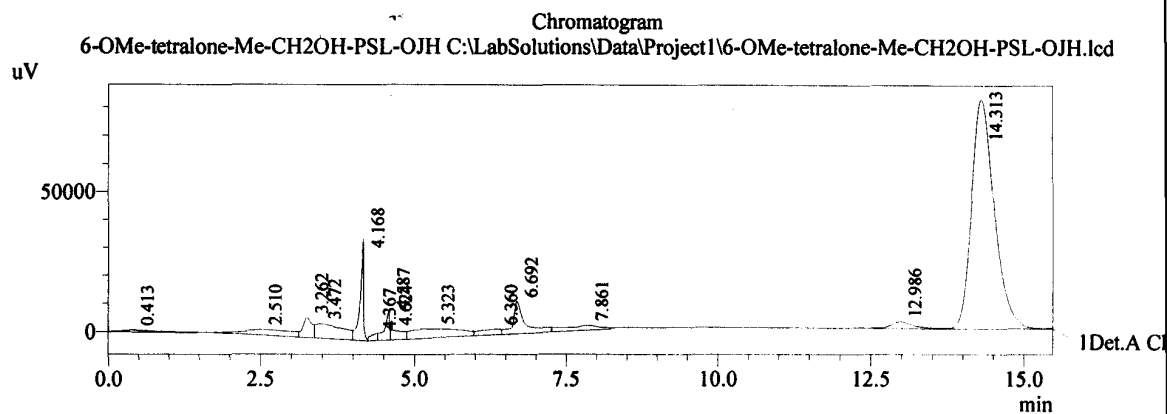

PeakTable

Detector A Ch1 254nm

| Peak# | Ret. Time | Area    | Height | Area %  | Height % |
|-------|-----------|---------|--------|---------|----------|
| 1     | 0.413     | 17807   | 533    | 0.555   | 0.317    |
| 2     | 2.510     | 100337  | 1776   | 3.130   | 1.057    |
| 3     | 3.262     | 71020   | 6863   | 2.215   | 4.086    |
| 4     | 3.472     | 155561  | 4954   | 4.852   | 2.950    |
| 5     | 4.168     | 134851  | 36178  | 4.206   | 21.543   |
| 6     | 4.367     | 17365   | 2271   | 0.542   | 1.353    |
| 7     | 4.587     | 54794   | 10312  | 1.709   | 6.140    |
| 8     | 4.624     | 46335   | 3271   | 1.445   | 1.948    |
| 9     | 5.323     | 166796  | 2873   | 5.202   | 1.711    |
| 10    | 6.360     | 44971   | 1746   | 1.403   | 1.040    |
| 11    | 6.692     | 155931  | 11343  | 4.864   | 6.754    |
| 12    | 7.861     | 66638   | 1646   | 2.078   | 0.980    |
| 13    | 12.986    | 53964   | 2299   | 1.683   | 1.369    |
| 14    | 14.313    | 2119729 | 81870  | 66.116  | 48.751   |
| Total |           | 3206100 | 167933 | 100.000 | 100.000  |

# HPLC chromatogram of acetate derivative of racemic 10

Department of Chemistry, IIT-Kharagpur

Sample Information  
Acquired by : Admin  
Sample Name : 5-F-indanone-Me-CH2OAc-racemic-OJH  
Sample ID : transesterification  
Vial# :  
Injection Volume : 5 uL  
Data Filename : 5-F-indanone-Me-CH2OAc-racemic-OJH.lcd  
Method Filename : adduct1.lcm  
Batch Filename :  
Report Filename : Default.lcr  
Date Acquired : 7/13/2009 9:42:10 AM  
Data Processed : 7/13/2009 9:55:58 AM

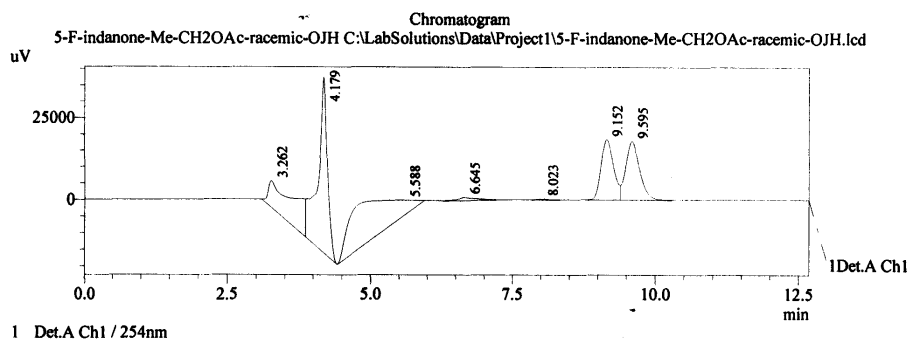

PeakTable

| Peak# | Ret. Time | Area    | Height | Area %  | Height % |
|-------|-----------|---------|--------|---------|----------|
| 1     | 3.262     | 317882  | 7990   | 14.298  | 7.738    |
| 2     | 4.179     | 625790  | 53368  | 28.147  | 51.686   |
| 3     | 5.588     | 682211  | 4592   | 30.685  | 4.447    |
| 4     | 6.645     | 18676   | 907    | 0.840   | 0.879    |
| 5     | 8.023     | 3032    | 214    | 0.136   | 0.208    |
| 6     | 9.152     | 276901  | 18372  | 12.455  | 17.793   |
| 7     | 9.595     | 298777  | 17811  | 13.439  | 17.250   |
| Total |           | 2223270 | 103255 | 100.000 | 100.000  |

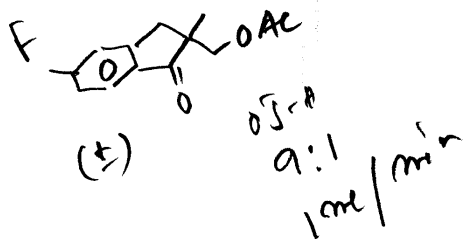

## HPLC chromatogram of (*R*)-acetate derivative of 10

### Department of Chemistry, IIT-Kharagpur

#### Sample Information

Acquired by : Admin  
Sample Name : fluoro-indanone-Me-CH2OC-OJH-AKL  
Sample ID : transesterification  
Vial# :  
Injection Volume : 5 uL  
Data Filename : fluoro-indanone-Me-CH2OC-OJH-AKL.lcd  
Method Filename : adduct1.lcm  
Batch Filename :  
Report Filename : Default.lcr  
Date Acquired : 10/15/2009 4:06:20 PM  
Data Processed : 10/15/2009 4:18:17 PM

#### Chromatogram

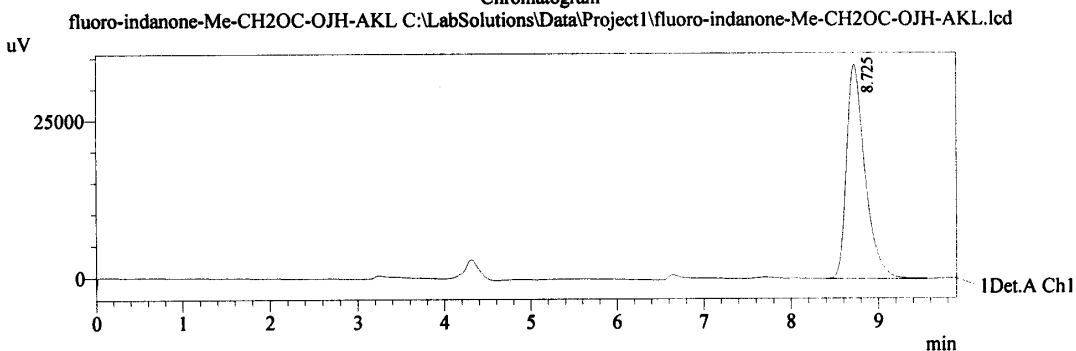

#### PeakTable

Detector A Ch1 254nm

| Peak# | Ret. Time | Area   | Height | Area %  | Height % |
|-------|-----------|--------|--------|---------|----------|
| 1     | 8.725     | 496932 | 34048  | 100.000 | 100.000  |
| Total |           | 496932 | 34048  | 100.000 | 100.000  |

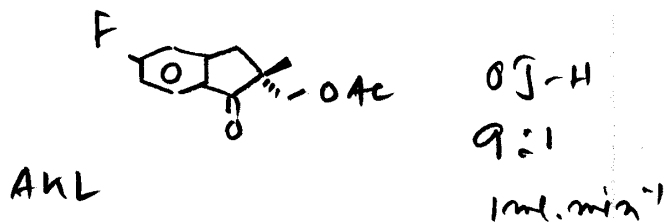

## HPLC chromatogram of racemic 10

==== Shimadzu LCsolution LC Data Image ====

<Chromatogram>

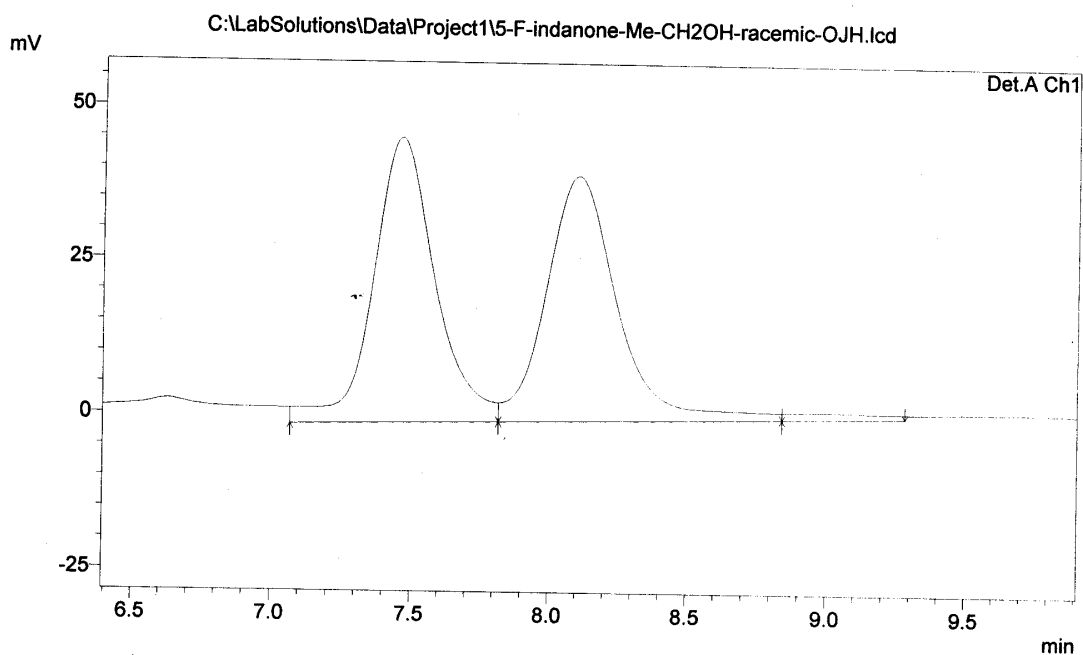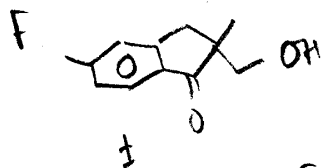

OJ-H

921

1 ml/min

## HPLC chromatogram of (S)- 10

### Department of Chemistry, IIT-Kharagpur

Sample Information  
Acquired by : Admin  
Sample Name : fluoro-indanone-Me-CH<sub>2</sub>OH-PS-OJH  
Sample ID : transesterification  
Vail# :  
Injection Volume : 5 uL  
Data Filename : fluoro-indanone-Me-CH<sub>2</sub>OH-PS-OJH.lcd  
Method Filename : adduct1.lcm  
Batch Filename :  
Report Filename : Default.lcr  
Date Acquired : 10/23/2009 9:47:26 AM  
Data Processed : 10/23/2009 9:56:44 AM

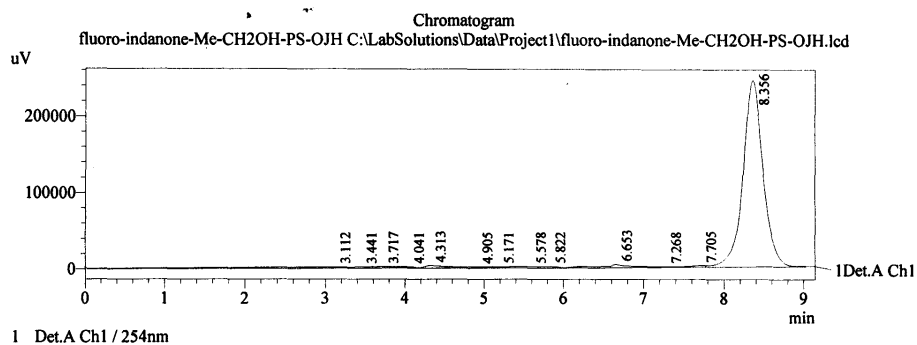

PeakTable

| Peak# | Ret. Time | Area    | Height | Area %  | Height % |
|-------|-----------|---------|--------|---------|----------|
| 1     | 3.112     | 175177  | 1410   | 3.617   | 0.530    |
| 2     | 3.441     | 22896   | 1525   | 0.473   | 0.573    |
| 3     | 3.717     | 30836   | 1653   | 0.637   | 0.621    |
| 4     | 4.041     | 22591   | 1477   | 0.466   | 0.555    |
| 5     | 4.313     | 59430   | 3174   | 1.227   | 1.193    |
| 6     | 4.905     | 21566   | 1358   | 0.445   | 0.510    |
| 7     | 5.171     | 22968   | 1448   | 0.474   | 0.544    |
| 8     | 5.578     | 40666   | 1548   | 0.840   | 0.582    |
| 9     | 5.822     | 20819   | 1504   | 0.430   | 0.565    |
| 10    | 6.653     | 98398   | 4079   | 2.032   | 1.533    |
| 11    | 7.268     | 18798   | 852    | 0.388   | 0.320    |
| 12    | 7.705     | 29203   | 1942   | 0.603   | 0.730    |
| 13    | 8.356     | 4279727 | 244172 | 88.368  | 91.745   |
| Total |           | 4843075 | 266143 | 100.000 | 100.000  |

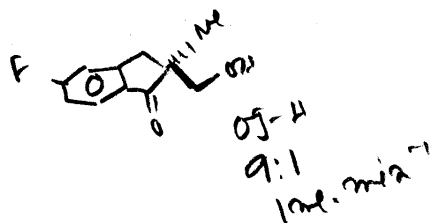



## HPLC chromatogram of racemic 11

### Department of Chemistry, IIT-Kharagpur

Sample Information  
Acquired by : Admin  
Sample Name : 5-Br-indanone-Me-CH<sub>2</sub>OH-racemic-OJH  
Sample ID : transesterification  
Vial# :  
Injection Volume : 5 uL  
Data Filename : 5-Br-indanone-Me-CH<sub>2</sub>OH-racemic-OJH.lcd  
Method Filename : adduct1.lcm  
Batch Filename :  
Report Filename : Default.lcr  
Date Acquired : 7/8/2009 9:40:55 AM  
Data Processed : 7/8/2009 9:51:48 AM

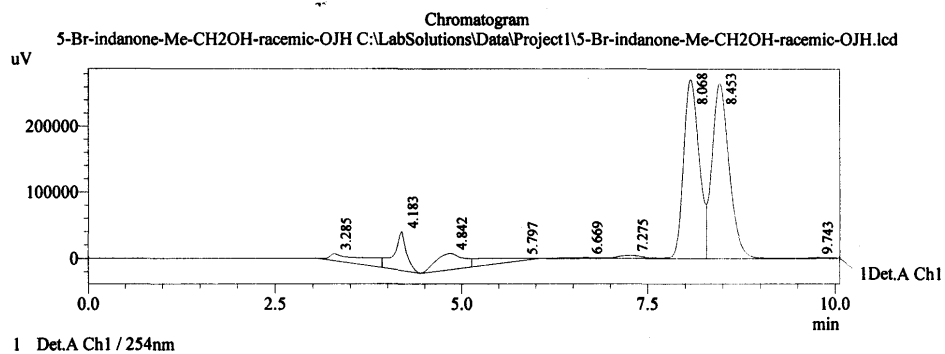

PeakTable

| Peak# | Ret. Time | Area     | Height | Area %  | Height % |
|-------|-----------|----------|--------|---------|----------|
| 1     | 3.285     | 428020   | 10048  | 4.183   | 1.574    |
| 2     | 4.183     | 656208   | 57531  | 6.413   | 9.011    |
| 3     | 4.842     | 621074   | 23930  | 6.070   | 3.748    |
| 4     | 5.797     | 332699   | 3375   | 3.252   | 0.529    |
| 5     | 6.669     | 17744    | 1069   | 0.173   | 0.167    |
| 6     | 7.275     | 89094    | 4190   | 0.871   | 0.656    |
| 7     | 8.068     | 3876692  | 271567 | 37.888  | 42.535   |
| 8     | 8.453     | 4196583  | 265809 | 41.014  | 41.633   |
| 9     | 9.743     | 13909    | 940    | 0.136   | 0.147    |
| Total |           | 10232023 | 638458 | 100.000 | 100.000  |

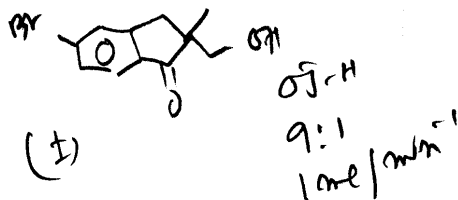

## HPLC chromatogram of (S)-11

### Department of Chemistry, IIT-Kharagpur

#### Sample Information

Acquired by : Admin  
Sample Name : bromo-indanone-Me-CH2OH-PS-OJH  
Sample ID : transesterification  
Vial# :  
Injection Volume : 5 uL  
Data Filename : bromo-indanone-Me-CH2OH-PS-OJH.lcd  
Method Filename : adduct1.lcm  
Batch Filename :  
Report Filename : Default.lcr  
Date Acquired : 10/23/2009 9:34:46 AM  
Data Processed : 10/23/2009 9:45:22 AM

#### Chromatogram

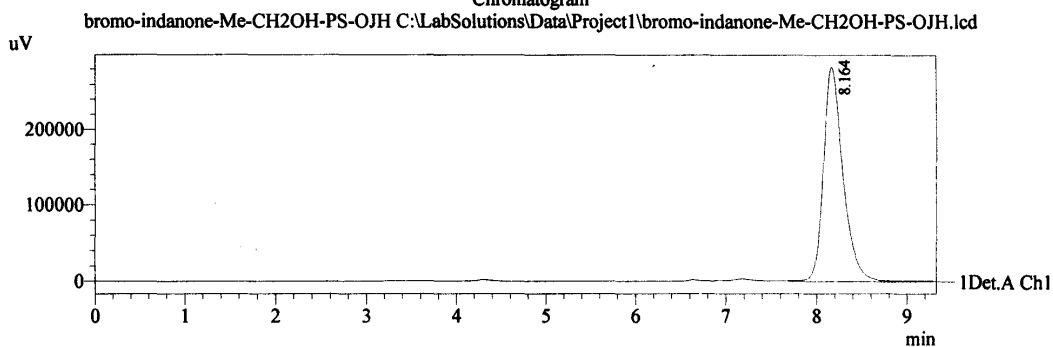

#### PeakTable

Detector A Ch1 254nm

| Peak# | Ret. Time | Area    | Height | Area %  | Height % |
|-------|-----------|---------|--------|---------|----------|
| 1     | 8.164     | 4226319 | 283269 | 100.000 | 100.000  |
| Total |           | 4226319 | 283269 | 100.000 | 100.000  |

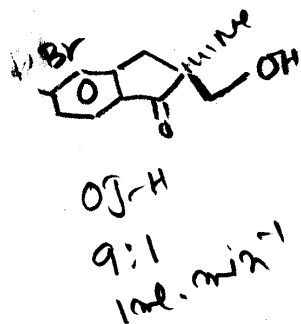

## HPLC chromatogram of racemic 12

### Department of Chemistry, IIT-Kharagpur

#### Sample Information

Acquired by : Admin  
Sample Name : 6-Me-indanone-Et-CH2OH-racemic-OJH  
Sample ID : transesterification  
Vail# :  
Injection Volume : 5 uL  
Data Filename : 6-Me-indanone-Et-CH2OH-racemic-OJH.lcd  
Method Filename : adduct1.lcm  
Batch Filename :  
Report Filename : Default.lcr  
Date Acquired : 6/5/2009 9:50:41 AM  
Data Processed : 6/5/2009 10:02:57 AM

#### Chromatogram

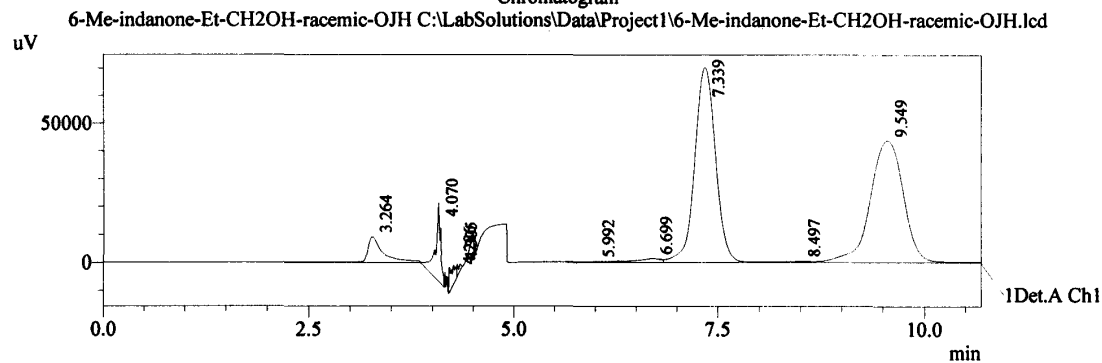

#### PeakTable

Detector A Ch1 254nm

| Peak# | Ret. Time | Area    | Height | Area %  | Height % |
|-------|-----------|---------|--------|---------|----------|
| 1     | 3.264     | 119113  | 9108   | 4.323   | 5.667    |
| 2     | 4.070     | 120064  | 27681  | 4.358   | 17.223   |
| 3     | 4.286     | 34580   | 4520   | 1.255   | 2.813    |
| 4     | 4.305     | 7756    | 4279   | 0.281   | 2.663    |
| 5     | 5.992     | 2497    | 155    | 0.091   | 0.096    |
| 6     | 6.699     | 28741   | 1337   | 1.043   | 0.832    |
| 7     | 7.339     | 1229128 | 69994  | 44.609  | 43.550   |
| 8     | 8.497     | 1423    | 107    | 0.052   | 0.067    |
| 9     | 9.549     | 1212015 | 43538  | 43.988  | 27.090   |
| Total |           | 2755317 | 160719 | 100.000 | 100.000  |

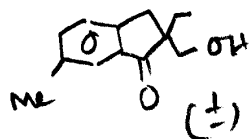

OJ-H  
9:1  
1ml.min<sup>-1</sup>

## HPLC chromatogram of (S)-12

### Department of Chemistry, IIT-Kharagpur

Sample Information

Acquired by : Admin  
Sample Name : methyl-indanone-Et-CH2OH-AKL-OJH  
Sample ID : transesterification  
Vial# :  
Injection Volume : 5 uL  
Data Filename : methyl-indanone-Et-CH2OH-AKL-OJH.lcd  
Method Filename : adduct1.lcm  
Batch Filename :  
Report Filename : Default.lcr  
Date Acquired : 10/15/2009 4:53:21 PM  
Data Processed : 10/15/2009 4:55:57 PM

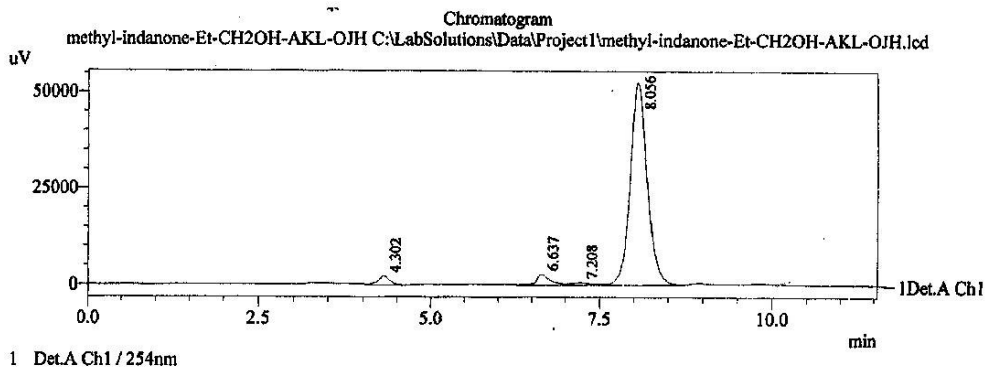

PeakTable

Detector A Ch1 254nm

| Peak# | Ret. Time | Area    | Height | Area %  | Height % |
|-------|-----------|---------|--------|---------|----------|
| 1     | 4.302     | 26839   | 2279   | 2.517   | 3.661    |
| 2     | 6.637     | 37816   | 2753   | 3.547   | 4.422    |
| 3     | 7.208     | 10063   | 544    | 0.944   | 0.874    |
| 4     | 8.056     | 897068  | 52504  | 84.143  | 84.345   |
| 5     | 10.604    | 94331   | 4170   | 8.848   | 6.698    |
| Total |           | 1066118 | 62249  | 100.000 | 100.000  |

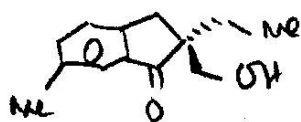

OJ-H  
9:1  
1ml/min

# HPLC chromatogram acetate derivative of racemic 12

Department of Chemistry, IIT-Kharagpur

## Sample Information

Acquired by : Admin  
Sample Name : methyl-indanone-Et-CH2acracemic-OJH  
Sample ID : transesterification  
Vial# :  
Injection Volume : 5 uL  
Data Filename : methyl-indanone-Et-CH2acracemic-OJH.lcd  
Method Filename : adduct1.lcm  
Batch Filename :  
Report Filename : Default.lcr  
Date Acquired : 10/15/2009 4:59:07 PM  
Data Processed : 10/15/2009 5:17:42 PM

## Chromatogram

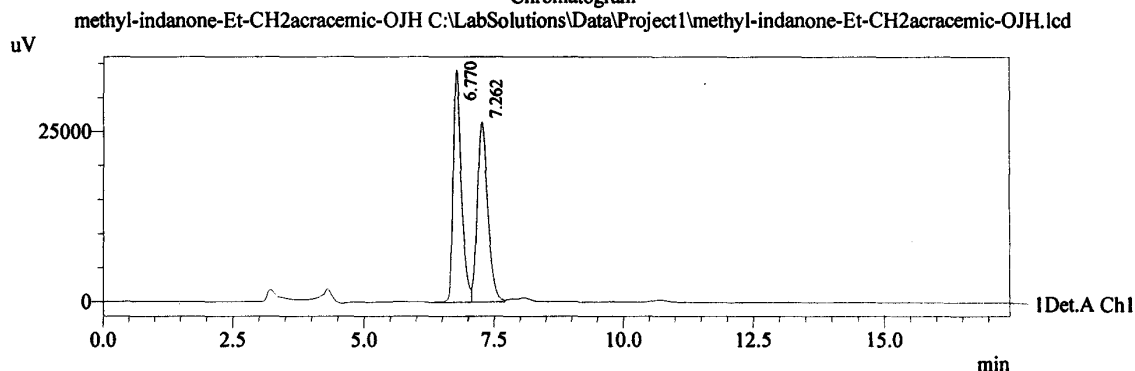

## PeakTable

Detector A Ch1 254nm

| Peak# | Ret. Time | Area   | Height | Area %  | Height % |
|-------|-----------|--------|--------|---------|----------|
| 1     | 6.770     | 372530 | 34155  | 49.939  | 56.333   |
| 2     | 7.262     | 373435 | 26475  | 50.061  | 43.667   |
| Total |           | 745965 | 60630  | 100.000 | 100.000  |

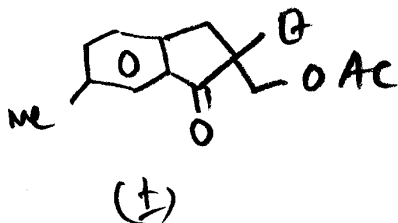

OJ-H  
9:1  
1 ml. min<sup>-1</sup>

# HPLC chromatogram (*R*)-acetate derivative of 12

## Department of Chemistry, IIT-Kharagpur

Sample Information  
Acquired by : Admin  
Sample Name : methyl-indanone-Et-CH<sub>2</sub>OAc-AKL-OJH  
Sample ID : transesterification  
Vial# :  
Injection Volume : 5 uL  
Data Filename : methyl-indanone-Et-CH<sub>2</sub>OAc-AKL-OJH.lcd  
Method Filename : adduct1.lcm  
Batch Filename :  
Report Filename : Default.lcr  
Date Acquired : 10/15/2009 5:20:18 PM  
Data Processed : 10/15/2009 5:30:18 PM

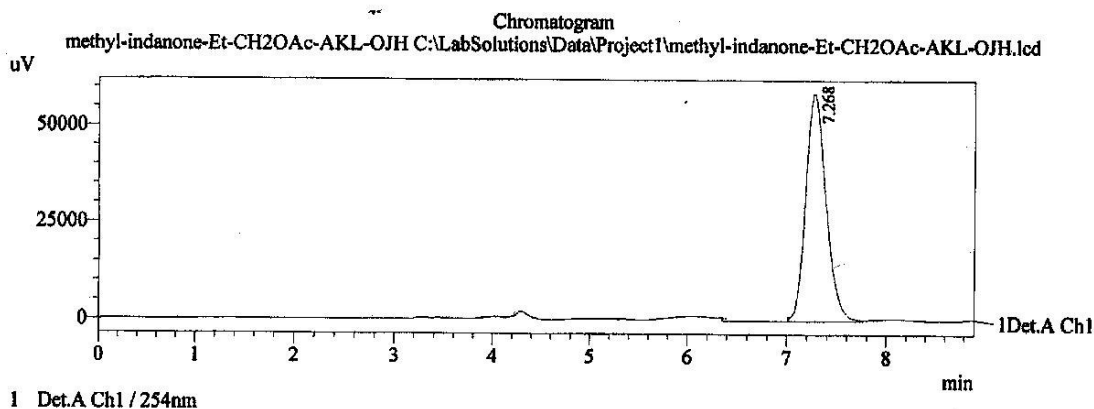

Detector A Ch1 254nm

PeakTable

| Peak# | Ret. Time | Area    | Height | Area %  | Height % |
|-------|-----------|---------|--------|---------|----------|
| 1     | 6.622     | 209951  | 13284  | 20.195  | 18.418   |
| 2     | 7.268     | 829659  | 58842  | 79.805  | 81.582   |
| Total |           | 1039611 | 72127  | 100.000 | 100.000  |

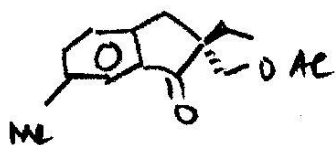

05-H  
9:1 (Hex:IPA)  
1 ml/min

## HPLC chromatogram of acetate derivative of racemic 13

Department of Chemistry, IIT-Kharagpur

Sample Information  
Acquired by : Admin  
Sample Name : chromanone-me-OAc-racemic  
Sample ID : monohydroxylation  
Vial# :  
Injection Volume : 5 uL  
Data Filename : chromanone-me-OAc-racemic.lcd  
Method Filename : tetralone 6 methoxy.lcm  
Batch Filename :  
Report Filename : Default.lcr  
Date Acquired : 1/15/2008 4:20:02 PM  
Data Processed : 1/15/2008 4:35:38 PM

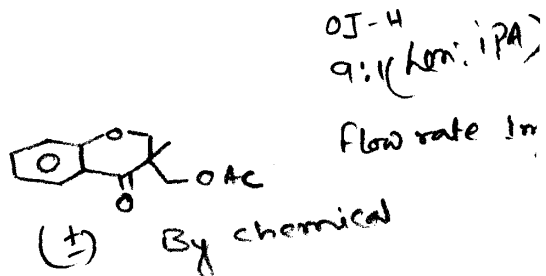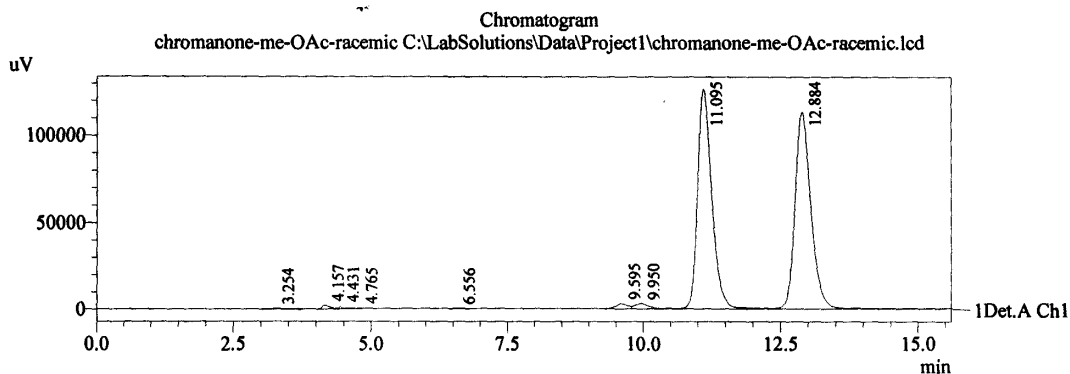

PeakTable

| Peak# | Ret. Time | Area    | Height | Area %  | Height % |
|-------|-----------|---------|--------|---------|----------|
| 1     | 3.254     | 5981    | 389    | 0.129   | 0.156    |
| 2     | 4.157     | 19370   | 2077   | 0.417   | 0.834    |
| 3     | 4.431     | 3110    | 1289   | 0.067   | 0.518    |
| 4     | 4.765     | 1180    | 88     | 0.025   | 0.035    |
| 5     | 6.556     | 1198    | 125    | 0.026   | 0.050    |
| 6     | 9.595     | 41627   | 2800   | 0.895   | 1.124    |
| 7     | 9.950     | 49158   | 2898   | 1.057   | 1.163    |
| 8     | 11.095    | 2264668 | 126357 | 48.704  | 50.736   |
| 9     | 12.884    | 2263540 | 113024 | 48.680  | 45.383   |
| Total |           | 4649833 | 249047 | 100.000 | 100.000  |

# HPLC chromatogram of (R)-acetate derivative of 13

Department of Chemistry, IIT-Kharagpur

Sample Information  
Acquired by : Admin  
Sample Name : chromanone-me-OAc-PSL  
Sample ID : monohydroxylation  
Vial# :  
Injection Volume : 5 uL  
Data Filename : chromanone-me-OAc-PSL.lcd  
Method Filename : tetralone 6 methoxy.lcm  
Batch Filename :  
Report Filename : Default.lcr  
Date Acquired : 1/15/2008 4:40:16 PM  
Data Processed : 1/15/2008 4:55:44 PM

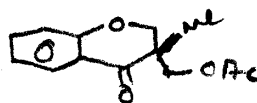

OJ-4  
9:1 (hex:IPA)  
1ml/min

From PS-Lipase  
trans esterification

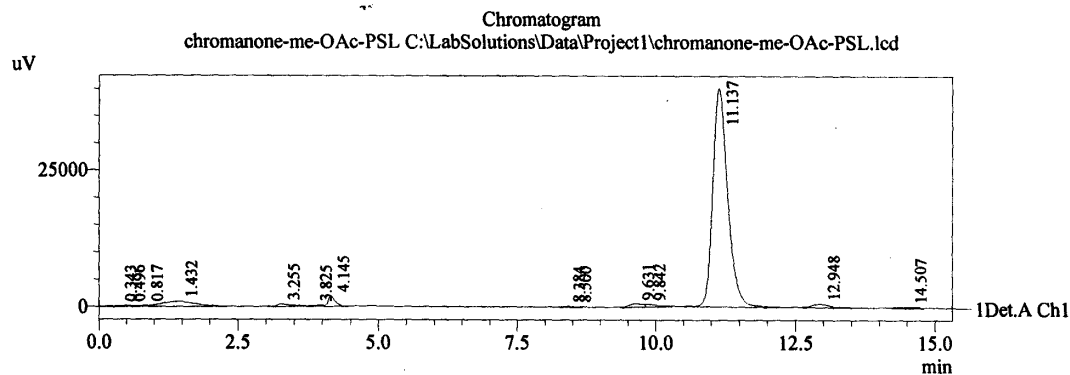

PeakTable

Detector A Ch1 254nm

| Peak# | Ret. Time | Area   | Height | Area %  | Height % |
|-------|-----------|--------|--------|---------|----------|
| 1     | 0.343     | 1772   | 134    | 0.210   | 0.292    |
| 2     | 0.496     | 1577   | 146    | 0.187   | 0.319    |
| 3     | 0.817     | 2153   | 157    | 0.255   | 0.342    |
| 4     | 1.432     | 37102  | 889    | 4.399   | 1.937    |
| 5     | 3.255     | 7963   | 420    | 0.944   | 0.915    |
| 6     | 3.825     | 1619   | 120    | 0.192   | 0.262    |
| 7     | 4.145     | 16308  | 1927   | 1.934   | 4.197    |
| 8     | 8.384     | 1144   | 116    | 0.136   | 0.253    |
| 9     | 8.500     | 1069   | 107    | 0.127   | 0.233    |
| 10    | 9.631     | 9858   | 539    | 1.169   | 1.174    |
| 11    | 9.842     | 5960   | 449    | 0.707   | 0.978    |
| 12    | 11.137    | 738318 | 40021  | 87.543  | 87.175   |
| 13    | 12.948    | 13299  | 646    | 1.577   | 1.408    |
| 14    | 14.507    | 5239   | 237    | 0.621   | 0.517    |
| Total |           | 843381 | 45909  | 100.000 | 100.000  |



# HPLC chromatogram of racemic 14

## Department of Chemistry, IIT-Kharagpur

Acquired by : Admin  
Sample Name : 6,7methoxychromanone-me  
Sample ID : monohydroxylation  
Vail# :  
Injection Volume : 10 uL  
Data Filename : 6,7methoxychromanone-me.lcd  
Method Filename : tetralone 6 methoxy.lcm  
Batch Filename :  
Report Filename : Default.lcr  
Date Acquired : 12/28/2007 12:10:03 PM  
Data Processed : 12/28/2007 12:30:38 PM

### Sample Information

ODH

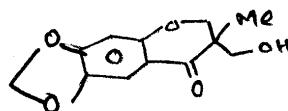

(D) 1ml/min

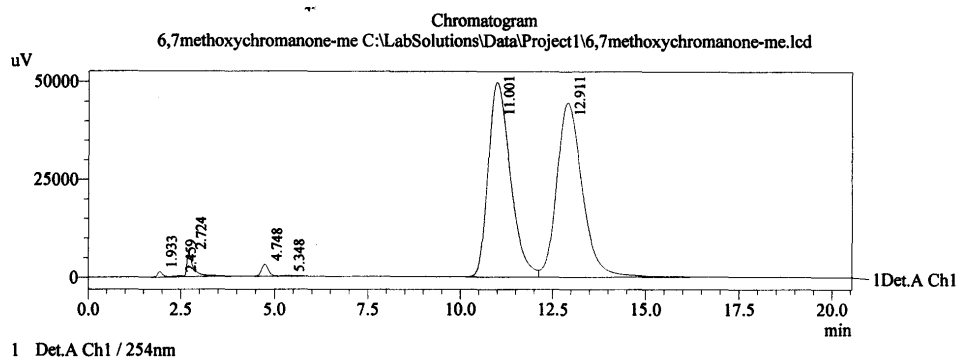

### PeakTable

Detector A Ch1 254nm

| Peak# | Ret. Time | Area    | Height | Area %  | Height % |
|-------|-----------|---------|--------|---------|----------|
| 1     | 1.933     | 12162   | 1311   | 0.281   | 1.250    |
| 2     | 2.459     | 2567    | 224    | 0.059   | 0.214    |
| 3     | 2.724     | 71762   | 5955   | 1.658   | 5.678    |
| 4     | 4.748     | 37139   | 2955   | 0.858   | 2.818    |
| 5     | 5.348     | 1894    | 119    | 0.044   | 0.113    |
| 6     | 11.001    | 2074847 | 49775  | 47.928  | 47.465   |
| 7     | 12.911    | 2128714 | 44527  | 49.172  | 42.461   |
| Total |           | 4329084 | 104865 | 100.000 | 100.000  |

# HPLC chromatogram of (S)- 14

Department of Chemistry, IIT-Kharagpur

Acquired by : Admin  
Sample Name : 1-tet-Ome-ch2OH-PSL-OJH  
Sample ID : transesterification  
Vial# :  
Injection Volume : 5 uL  
Data Filename : 1-tet-Ome-ch2OH-PSL-OJH.lcd  
Method Filename : adduct1.lcm  
Batch Filename :  
Report Filename : Default.lcr  
Date Acquired : 5/18/2009 5:18:59 PM  
Data Processed : 5/18/2009 5:38:00 PM

## Sample Information

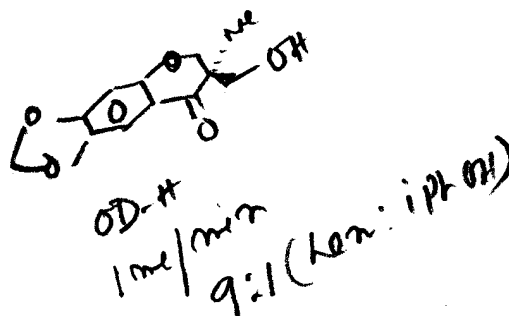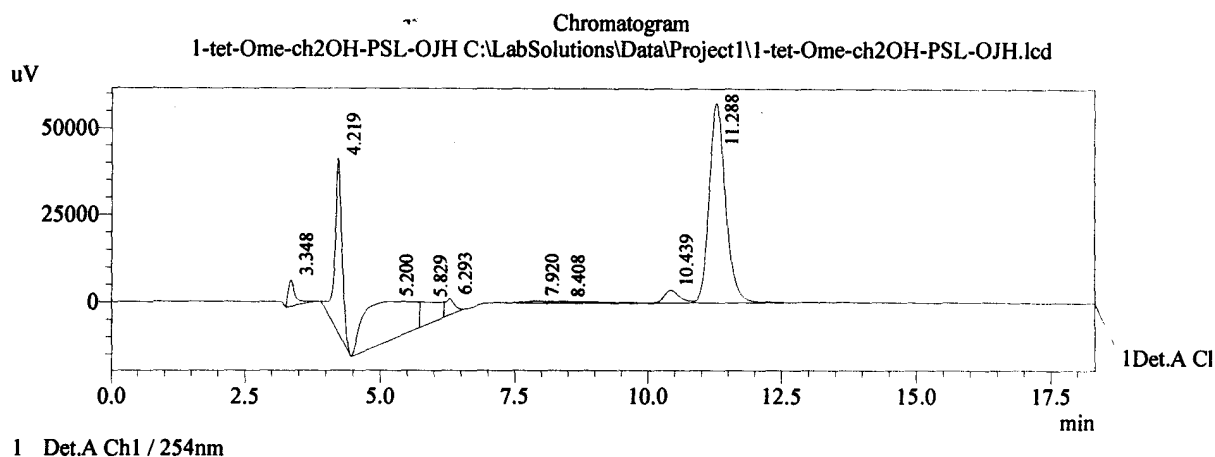

## PeakTable

Detector A Ch1 254nm

| Peak# | Ret. Time | Area    | Height | Area %  | Height % |
|-------|-----------|---------|--------|---------|----------|
| 1     | 3.348     | 65351   | 7461   | 2.357   | 5.266    |
| 2     | 4.219     | 456621  | 50127  | 16.466  | 35.375   |
| 3     | 5.200     | 715631  | 10955  | 25.806  | 7.731    |
| 4     | 5.829     | 156147  | 6634   | 5.631   | 4.681    |
| 5     | 6.293     | 53973   | 4521   | 1.946   | 3.190    |
| 6     | 7.920     | 12325   | 531    | 0.444   | 0.374    |
| 7     | 8.408     | 17466   | 351    | 0.630   | 0.248    |
| 8     | 10.439    | 72548   | 3641   | 2.616   | 2.570    |
| 9     | 11.288    | 1223004 | 57480  | 44.103  | 40.564   |
| Total |           | 2773066 | 141702 | 100.000 | 100.000  |
